# Supplementary material
Source: PubMed Central journal article supplement (PMC6097937)
Supplement: NIHMS978043-supplement-01.pdf [file NIHMS978043-supplement-01.pdf]

# Supporting Information

## Photoredox Cyanomethylation of Indoles: Catalyst Modification and Mechanism

Connor J. O'Brien, Daniel G. Droege, Alexander Y. Jiu, Shivaani S. Gandhi, Nick A. Paras, Steven H. Olson, & Jay Conrad\*

Institute for Neurodegenerative Diseases (IND), Weill Institute for Neurosciences, University of California, San Francisco, San Francisco, California 94158, United States.

### Contents

|                                                                                                                                                                                                                               |     |
|-------------------------------------------------------------------------------------------------------------------------------------------------------------------------------------------------------------------------------|-----|
| <b>Figure S1.</b> Reaction progress for the conversion of <b>1</b> to <b>3</b> following Procedure A, with the LED light turned on for 2 h, then off between 2-4 h, turned on between 4-6 h, then turned off from 6-8 h. .... | S2  |
| <b>Figure S2.</b> Time course for the reaction of indole and bromoacetonitrile using catalyst <b>6</b> or <b>11</b> . ....                                                                                                    | S3  |
| <b>Figure S3.</b> LCMS characterization of BrCH <sub>2</sub> CN addition to catalyst <b>6</b> . ....                                                                                                                          | S4  |
| <b>Figure S4.</b> LCMS trace for Catalyst <b>6</b> , LCMS, Time 0 with MS spectrum for main peak. ....                                                                                                                        | S5  |
| <b>Figure S5.</b> LCMS trace for catalyst <b>6</b> , 30 min, 50 equiv BrMeCN, Blue LED with MS spectra for peaks. ....                                                                                                        | S7  |
| <b>Figure S6.</b> LCMS characterization of BrCH <sub>2</sub> CN addition to catalyst <b>11</b> . ....                                                                                                                         | S8  |
| <b>Figure S7.</b> LCMS trace for Catalyst <b>11</b> , LCMS, Time 0 with MS spectrum for main peak. ....                                                                                                                       | S9  |
| <b>Figure S8.</b> LCMS trace for catalyst <b>11</b> , 30 min, 50 equiv BrMeCN, Blue LED with MS spectra for peaks. ....                                                                                                       | S11 |
| <b>Figure S9.</b> LCMS characterization of catalyst <b>6</b> or <b>11</b> with BrCH <sub>2</sub> CN added and kept in the dark for 30 min. ....                                                                               | S12 |
| NMR Spectra .....                                                                                                                                                                                                             | S13 |

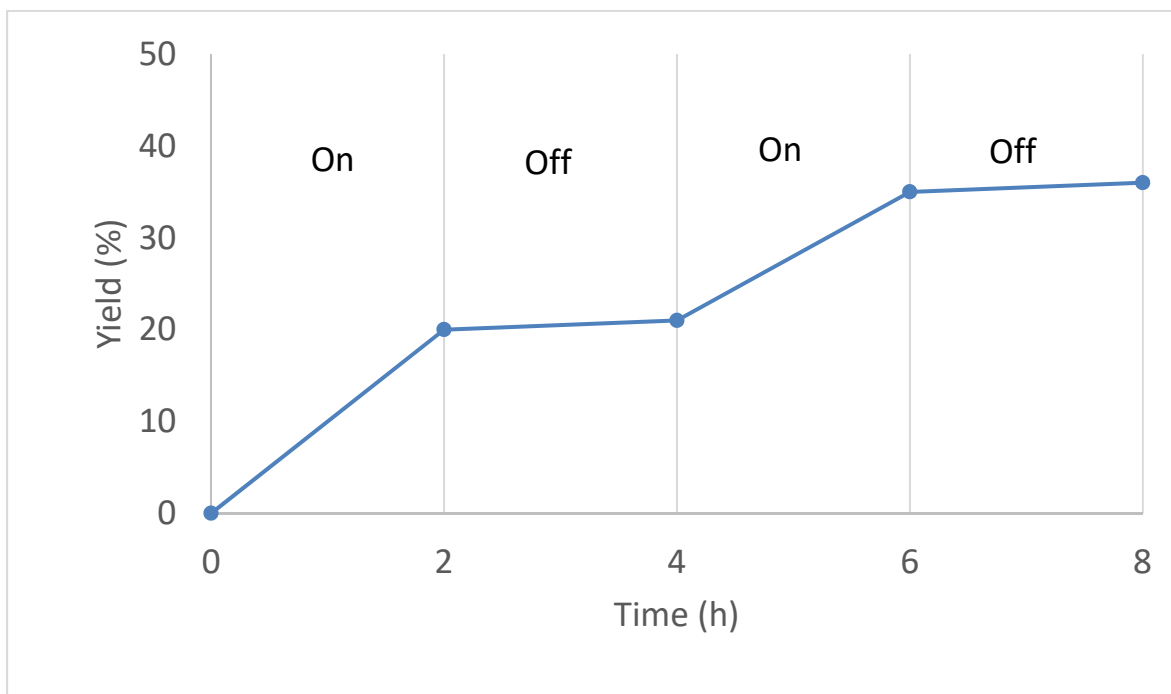

**Figure S1.** Reaction progress for the conversion of **1** to **3** following Procedure A, with the LED light turned on for 2 h, then off between 2-4 h, turned on between 4-6 h, then turned off from 6-8 h.

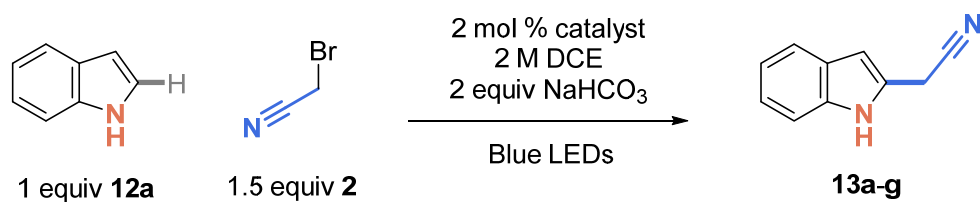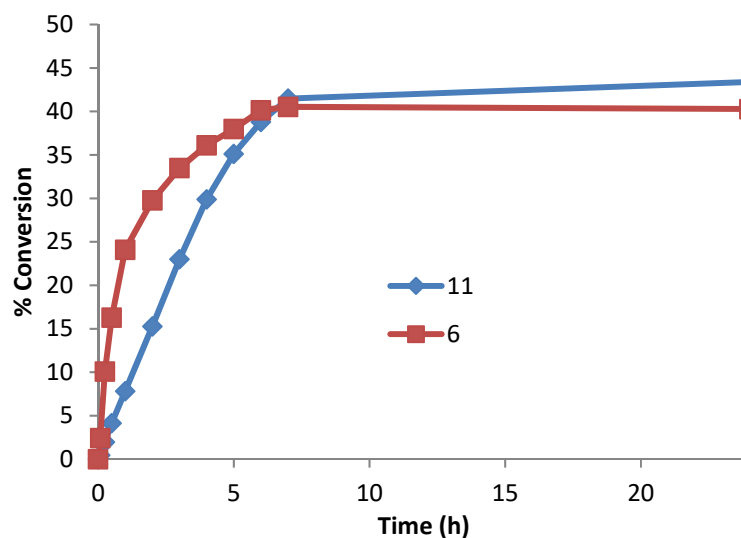

**Figure S2.** Time course for the reaction of indole and bromoacetonitrile using catalyst **6** or **11**.

**Procedure for time course:**

Indole (66 mg, 563  $\mu\text{mol}$ ), catalyst (0.02 Eq, 11.3  $\mu\text{mol}$ ), internal standard ethyl 6-(trifluoromethyl)nicotinate (62 mg, 0.5 equiv, 282  $\mu\text{mol}$ ) and sodium hydrogen carbonate (95 mg, 2 Eq, 1.13 mmol) were added to a flame dried vial. The vial was then evacuated, and back-filled with argon three times. Under positive pressure of argon, DCE (0.23 mL) and bromoacetonitrile (101 mg, 58.9  $\mu\text{L}$ , 1.5 equiv, 845  $\mu\text{mol}$ ) were added successively. The resulting solution was sparged under argon for 15 min. The vial was then placed in front of the blue light under positive pressure of argon. The reaction was then sampled at set timepoints and the assay yield determined relative to internal standard. Average of two runs +/- 2%.

## LC-MS Characterization of BrMeCN Addition to Catalyst

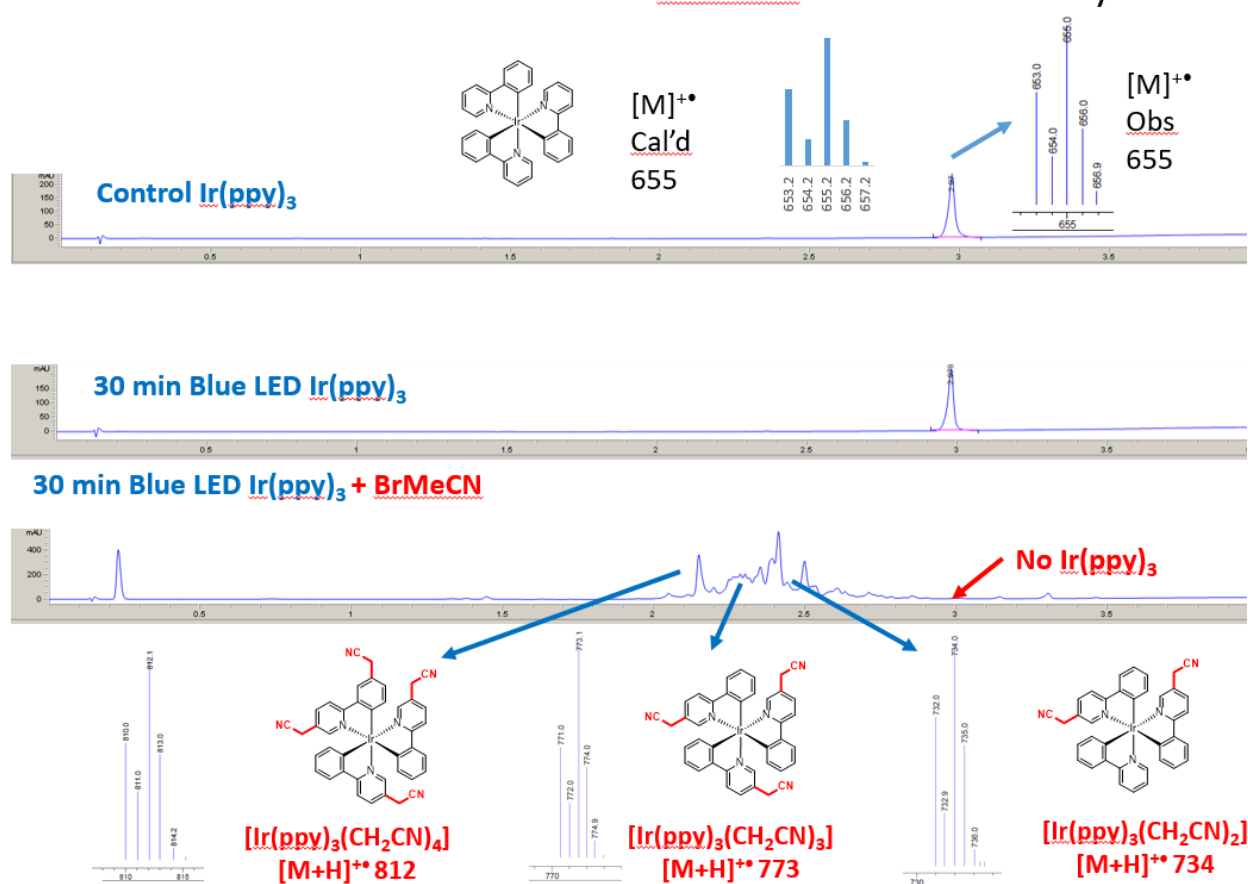

**Figure S3.** LCMS characterization of  $\text{BrCH}_2\text{CN}$  addition to catalyst **6**.

Current Chromatogram(s)

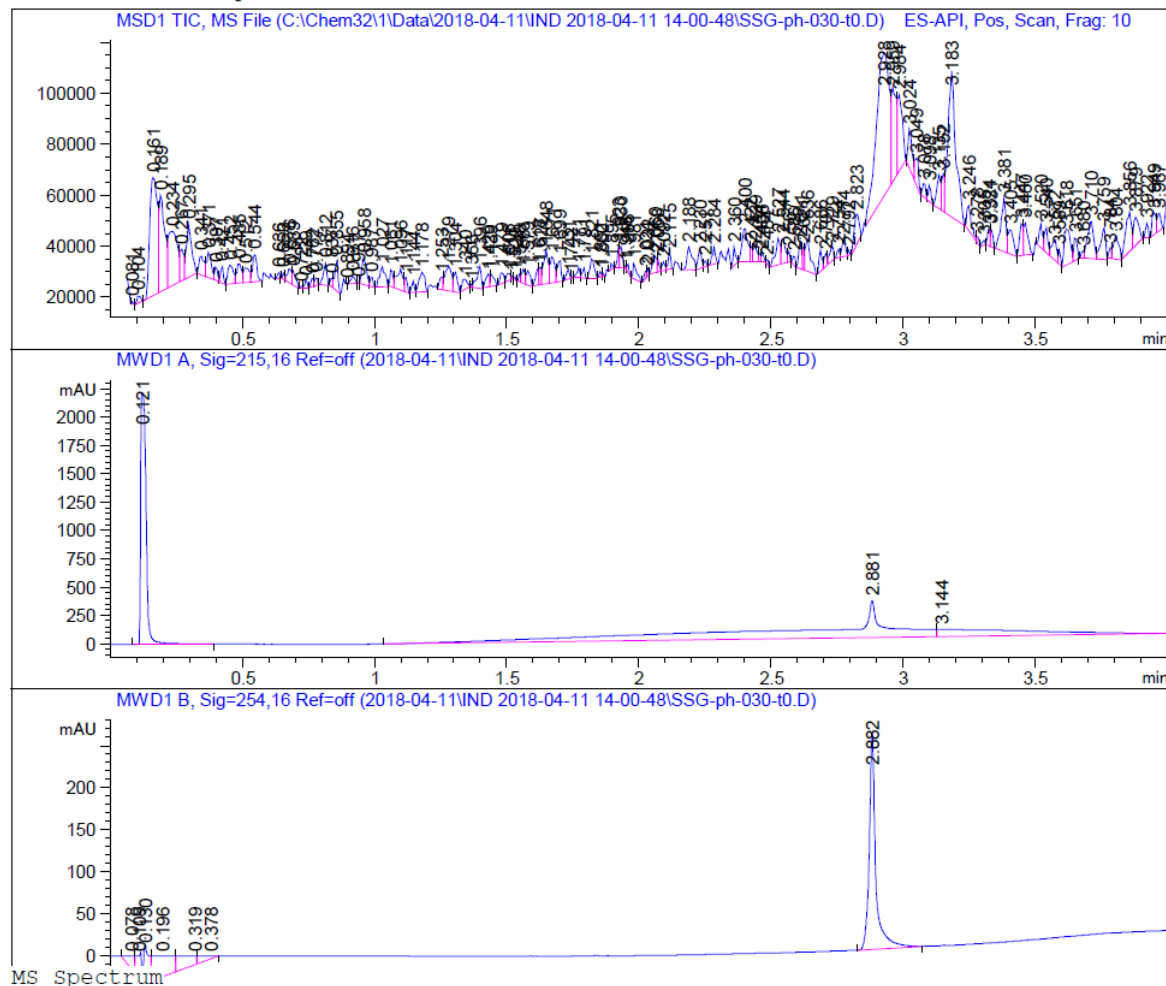

Current Chromatogram(s)

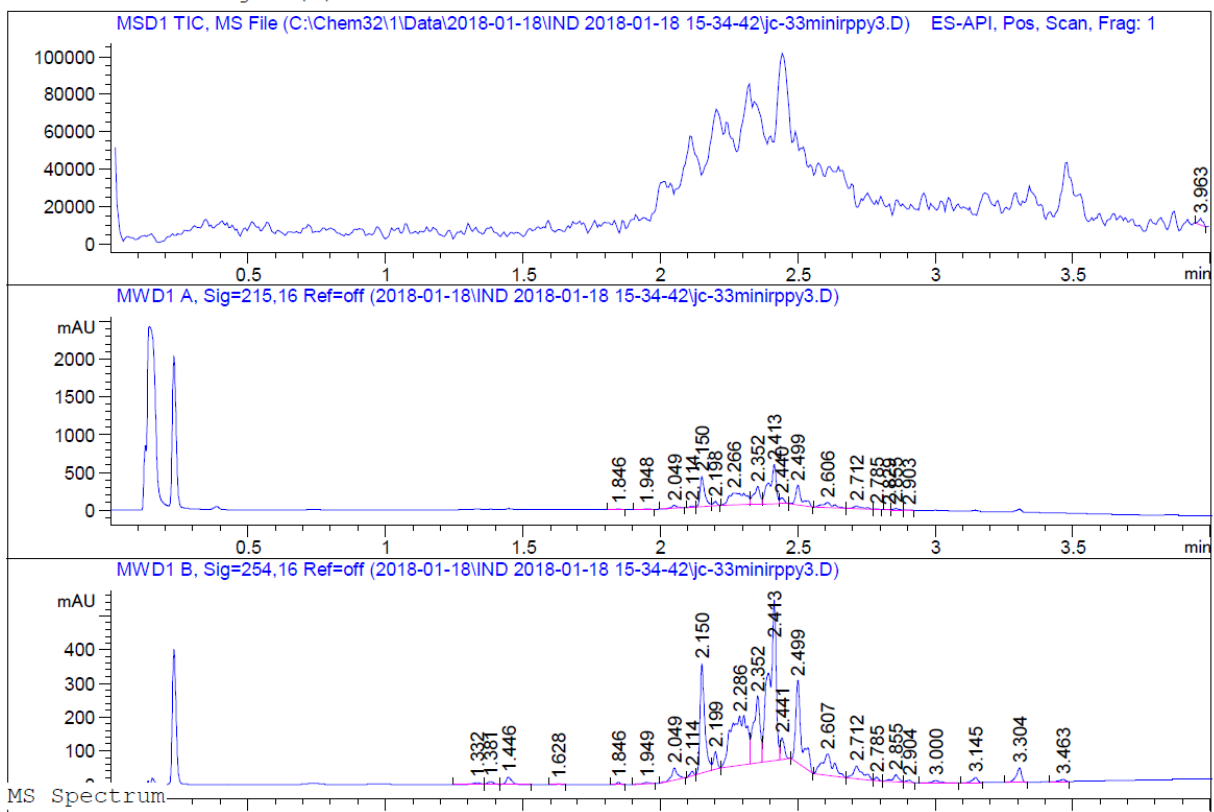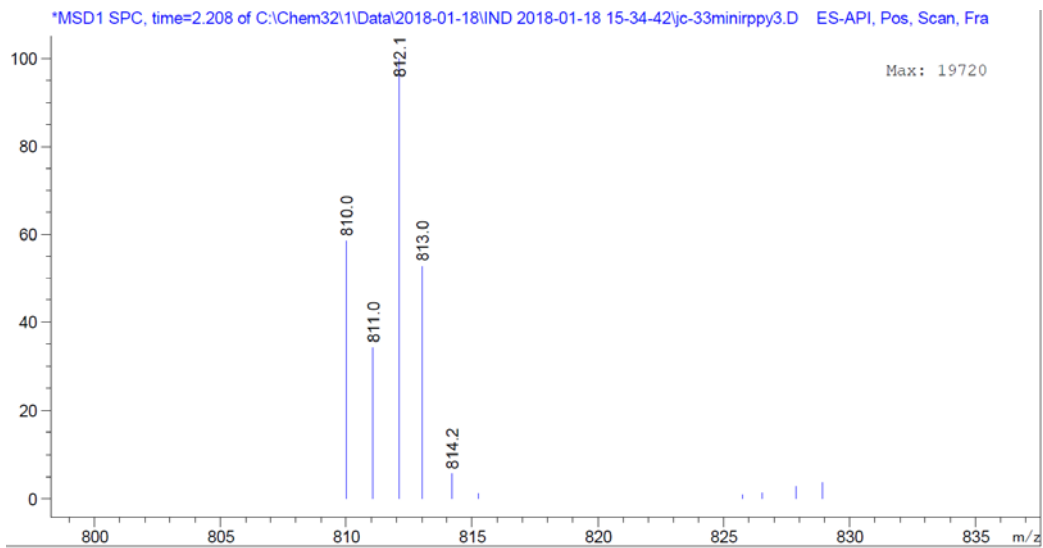

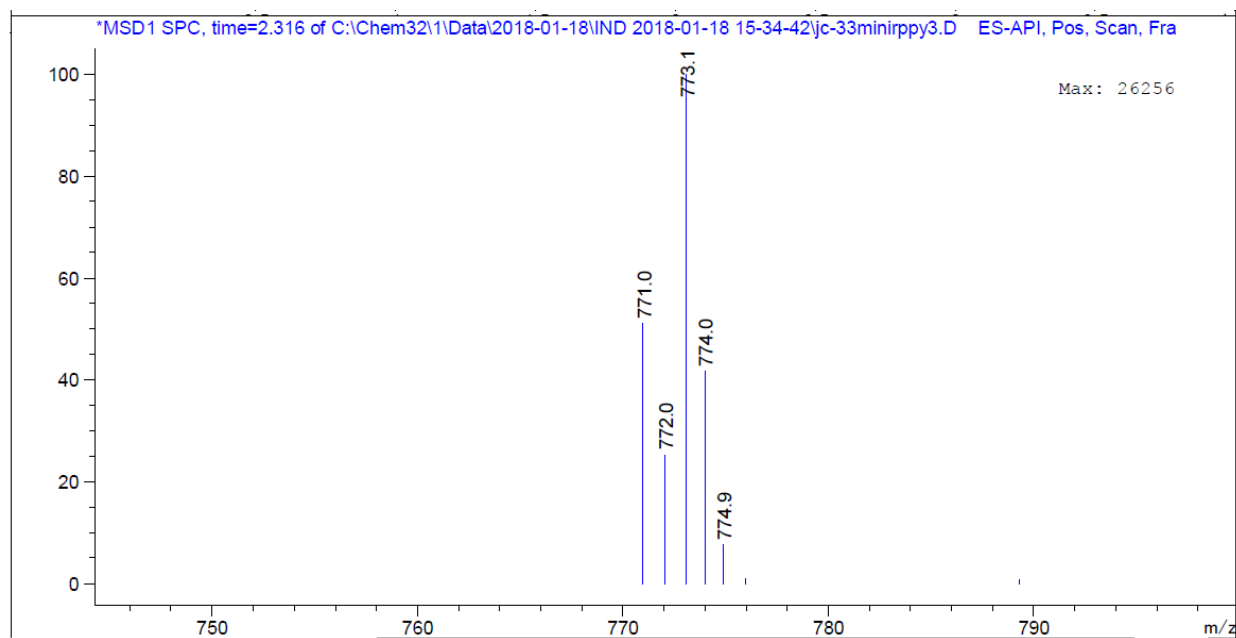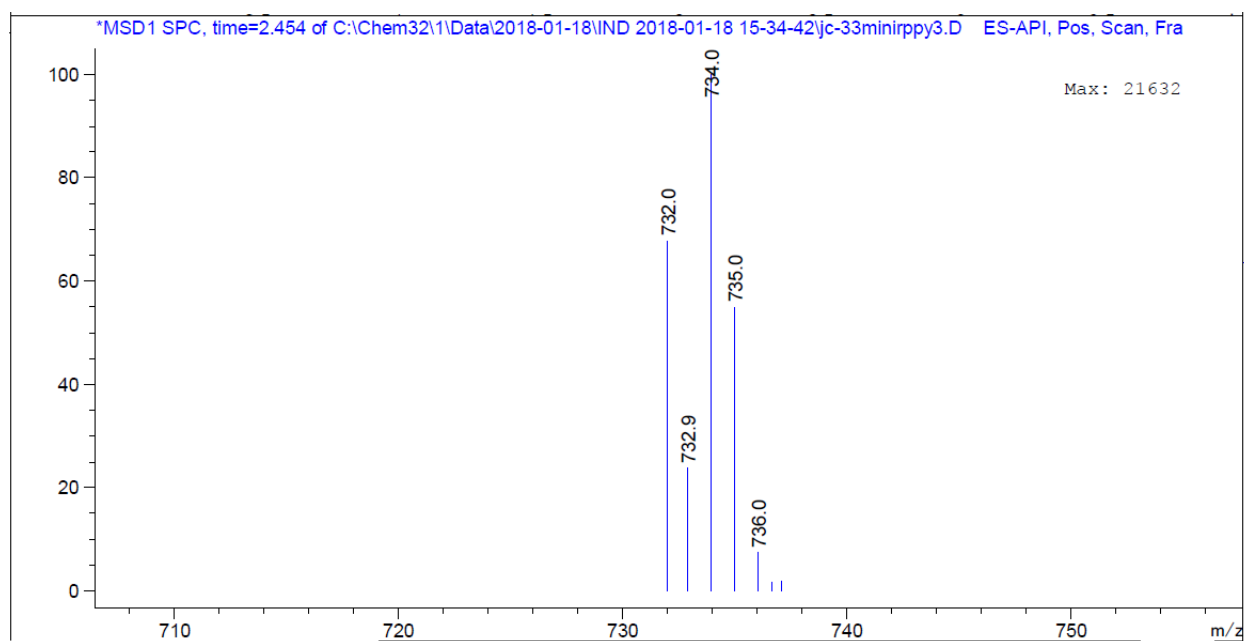

**Figure S5.** LCMS trace for catalyst **6**, 30 min, 50 equiv BrMeCN, Blue LED with MS spectra for peaks.

## LC-MS Characterization of BrMeCN Addition to Catalyst

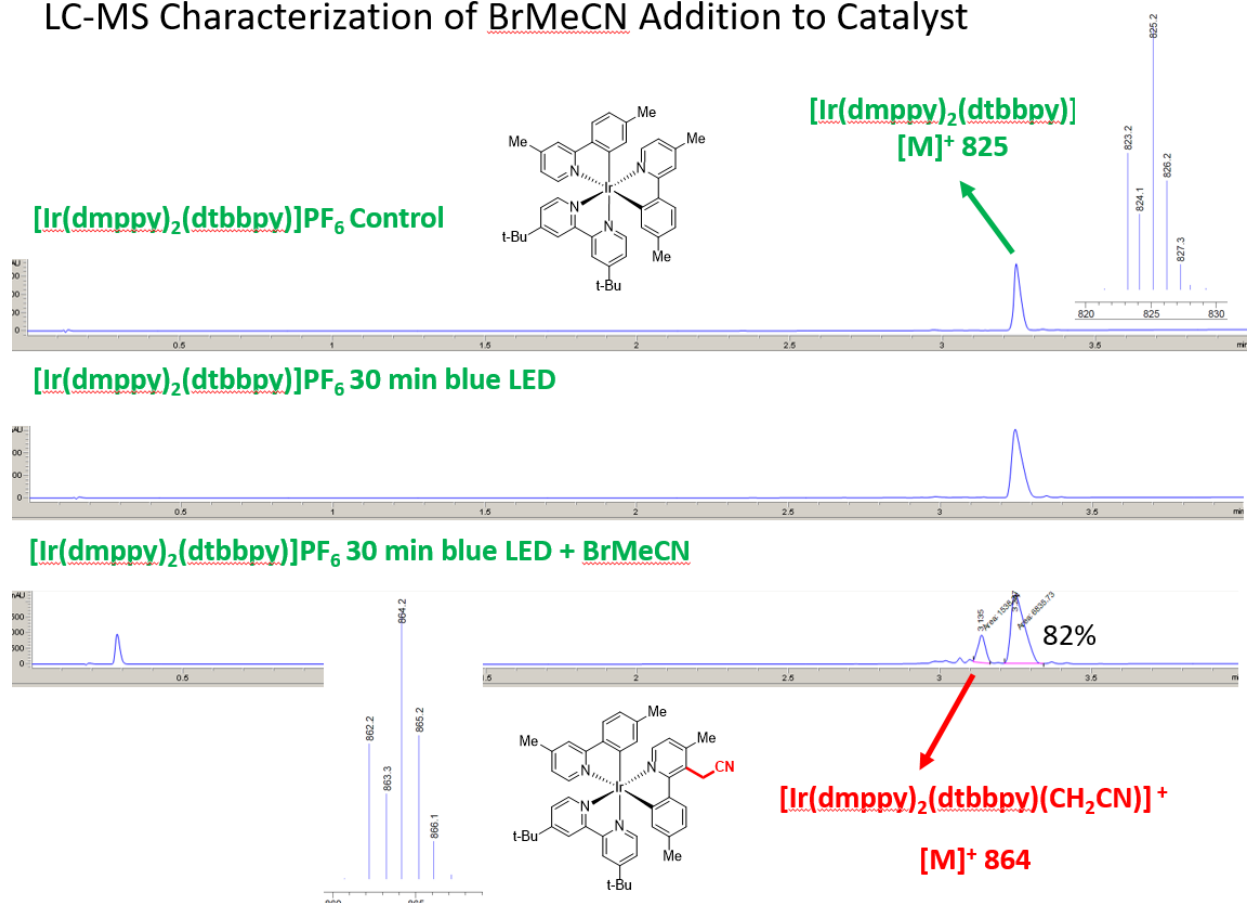

**Figure S6.** LCMS characterization of BrCH<sub>2</sub>CN addition to catalyst **11**.



Current Chromatogram(s)

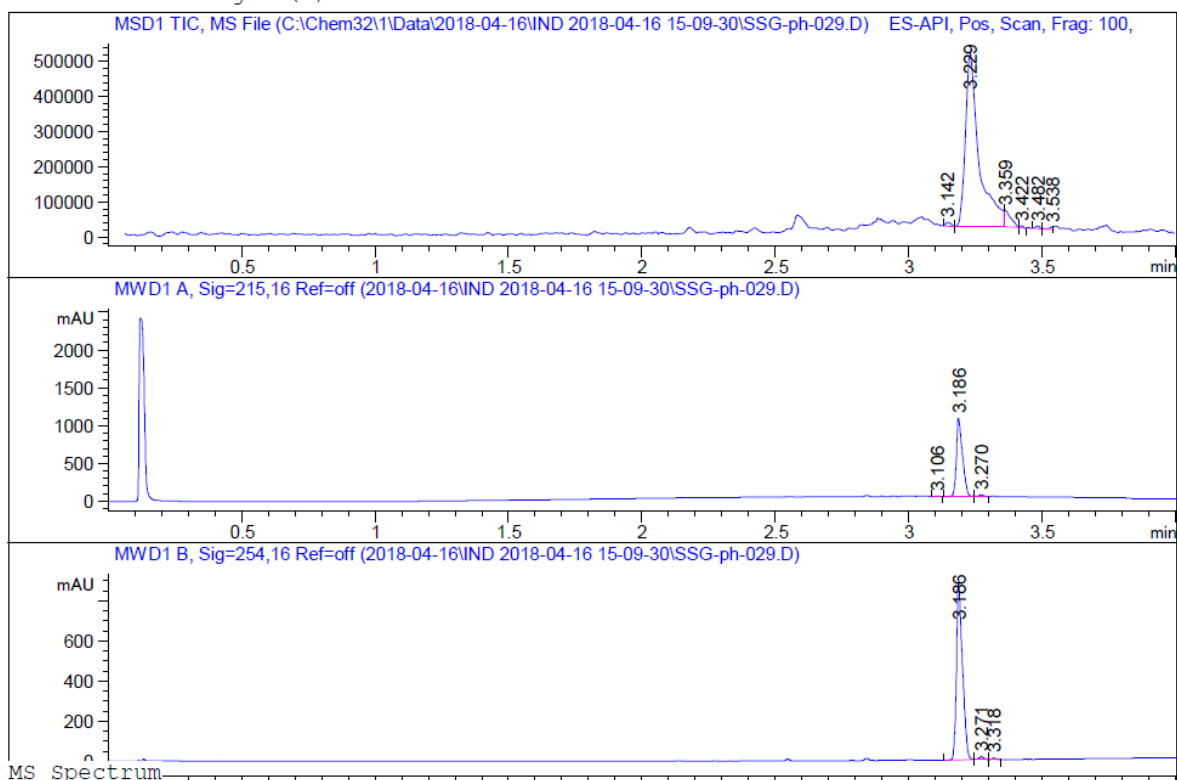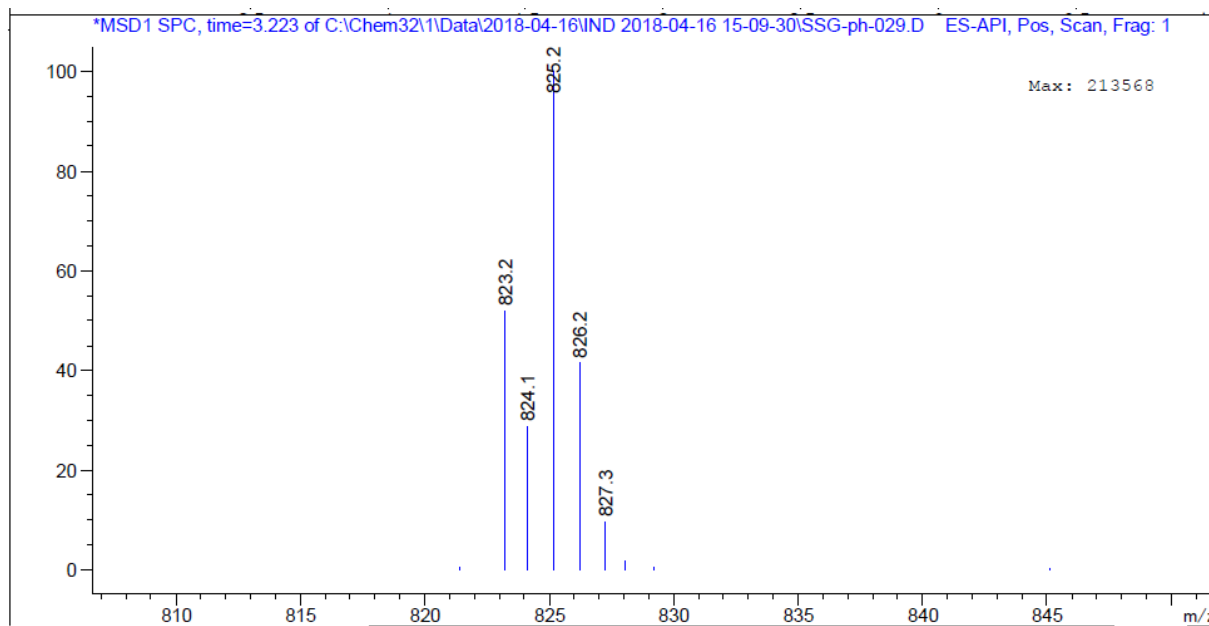

**Figure S7.** LCMS trace for Catalyst **11**, LCMS, Time 0 with MS spectrum for main peak.

Current Chromatogram(s)

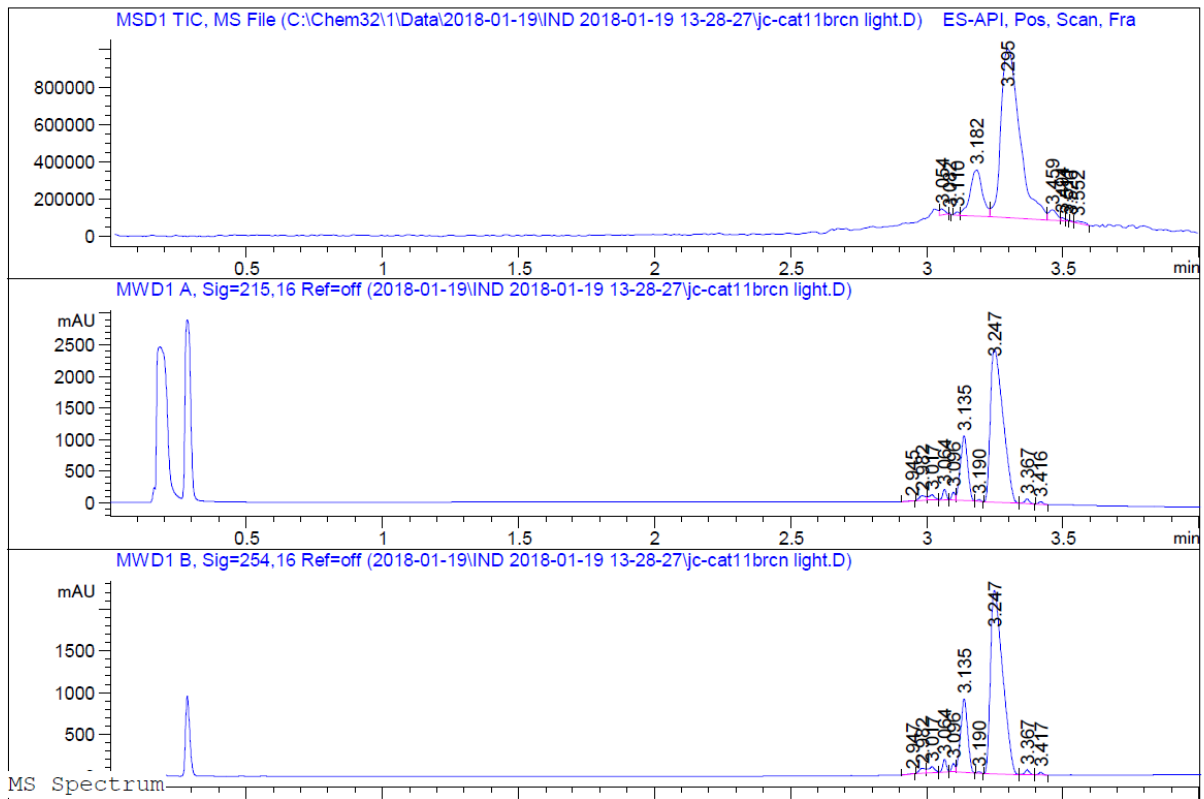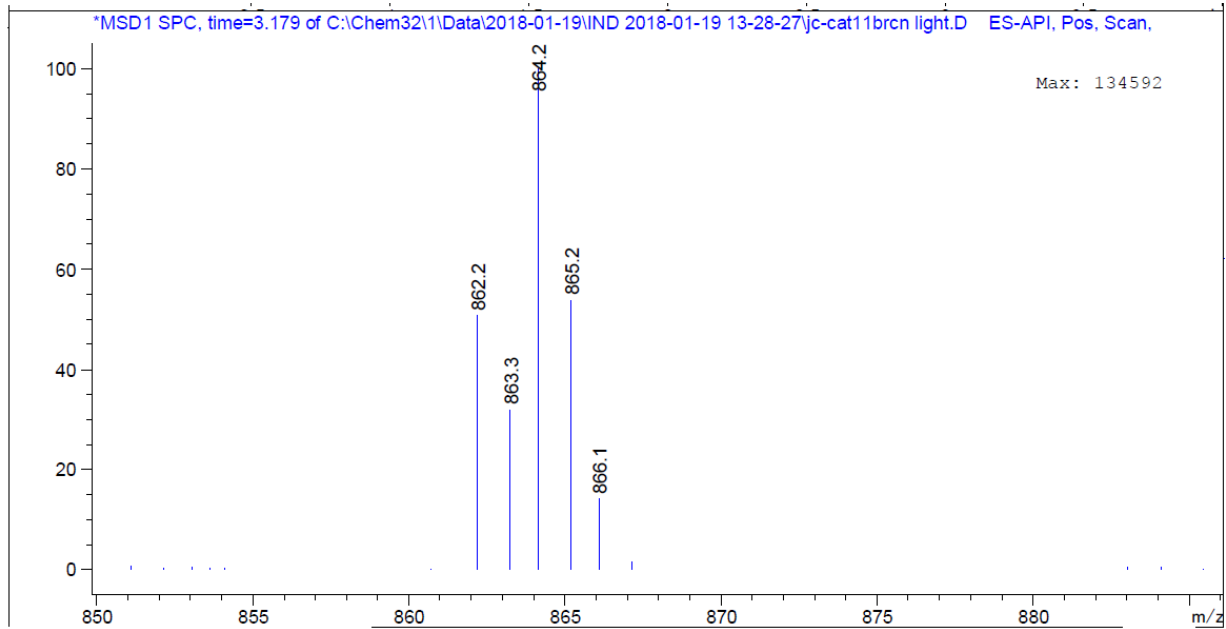

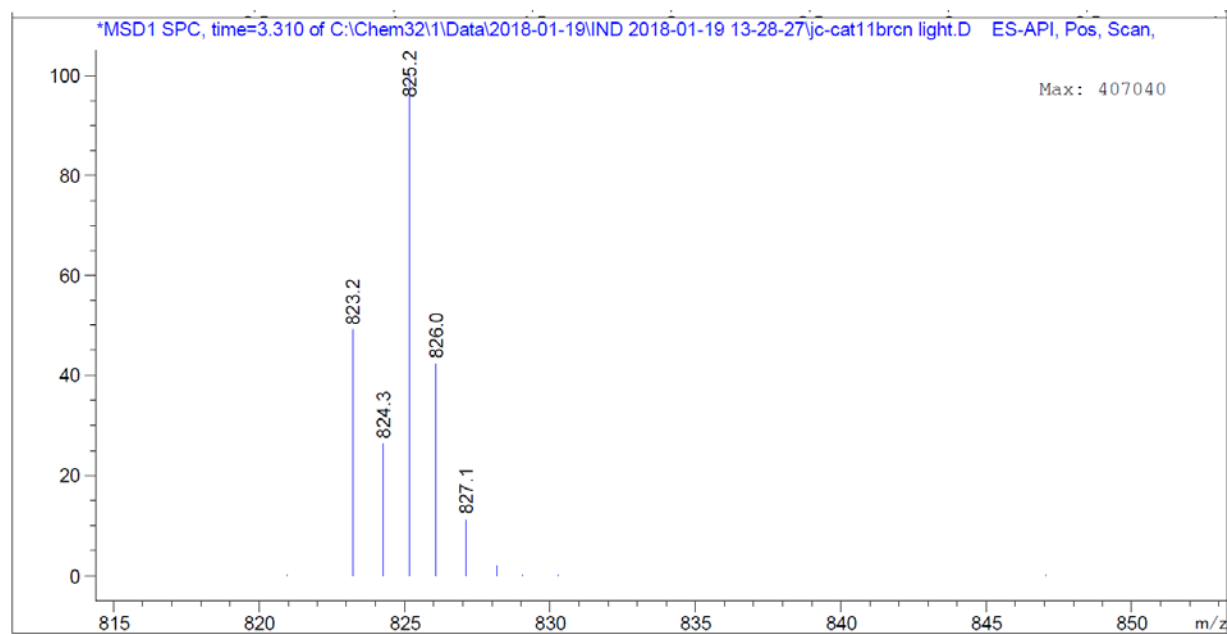

**Figure S8.** LCMS trace for catalyst **11**, 30 min, 50 equiv BrMeCN, Blue LED with MS spectra for peaks.

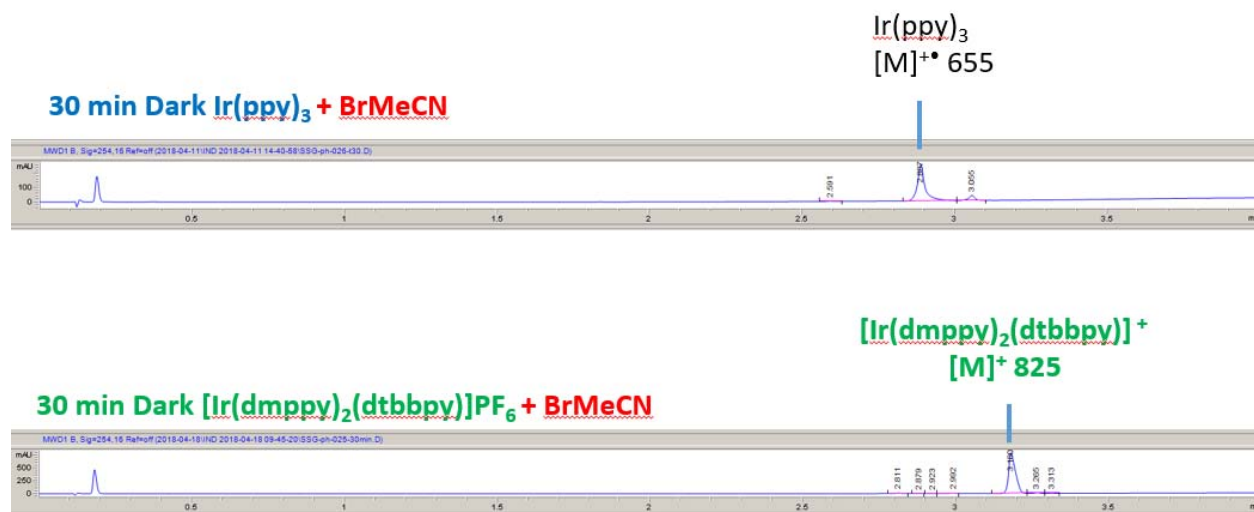

**Figure S9.** LCMS characterization of catalyst **6** or **11** with  $\text{BrCH}_2\text{CN}$  added and kept in the dark for 30 min.

## NMR Spectra

|                        |                        |                        |                      |                      |                      |
|------------------------|------------------------|------------------------|----------------------|----------------------|----------------------|
| Acquisition Time (sec) | 4.0894                 | Date                   | 21 Jul 2017 08:08:48 | Date Stamp           | 21 Jul 2017 08:08:48 |
| File Name              | D:\NMR\CJO\CJO-A\1\fid | Frequency (MHz)        | 400.15               | Nucleus              | <sup>1</sup> H       |
| Origin                 | spect                  | Original Points Count  | 32768                | Owner                | IND-NMR              |
| Receiver Gain          | 141.25                 | SW(cyclical) (Hz)      | 8012.82              | Points Count         | 32768                |
| Sweep Width (Hz)       | 8012.58                | Solvent                | DMSO-d6              | Spectrum Offset (Hz) | 2470.9260            |
|                        |                        | Temperature (degree C) | 22.852               | Number of Transients | 32                   |
|                        |                        |                        |                      | Pulse Sequence       | zg30                 |
|                        |                        |                        |                      | Spectrum Type        | STANDARD             |

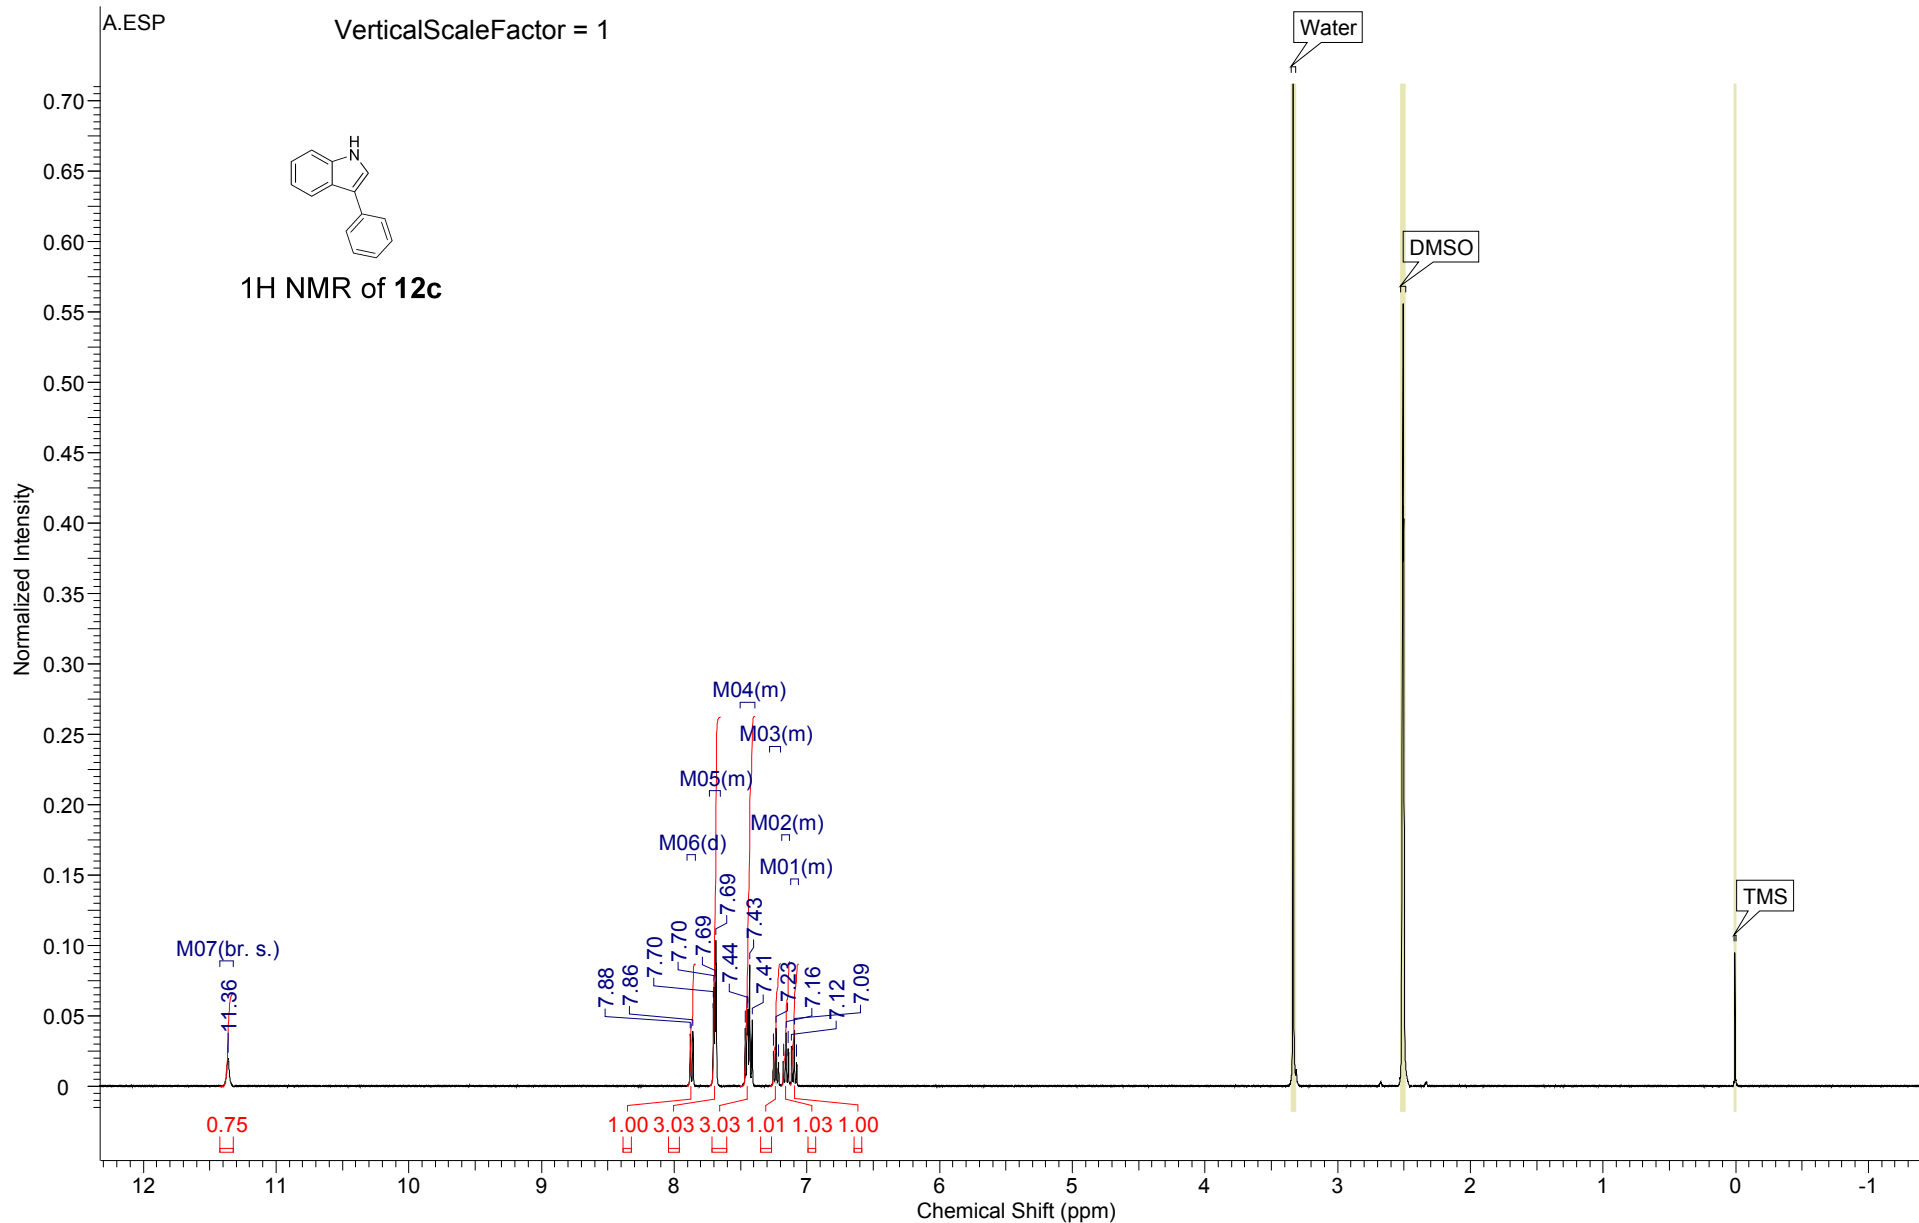

|                        |                             |                        |                      |                       |                      |
|------------------------|-----------------------------|------------------------|----------------------|-----------------------|----------------------|
| Acquisition Time (sec) | 1.3631                      | Date                   | 27 Jul 2017 01:51:12 | Date Stamp            | 27 Jul 2017 01:51:12 |
| File Name              | D:\NMR\CJO\CJO-A\CARBON.fid | Frequency (MHz)        | 100.63               | Nucleus               | 13C                  |
| Number of Transients   | 4000                        | Origin                 | spect                | Original Points Count | 32768                |
| Points Count           | 32768                       | Pulse Sequence         | zgpg30               | Receiver Gain         | 196.40               |
| Solvent                | DMSO-d6                     | Spectrum Offset (Hz)   | 10061.7803           | SW(cyclical) (Hz)     | 24038.46             |
| Sweep Width (Hz)       | 24037.73                    | Temperature (degree C) | 23.270               | Spectrum Type         | STANDARD             |

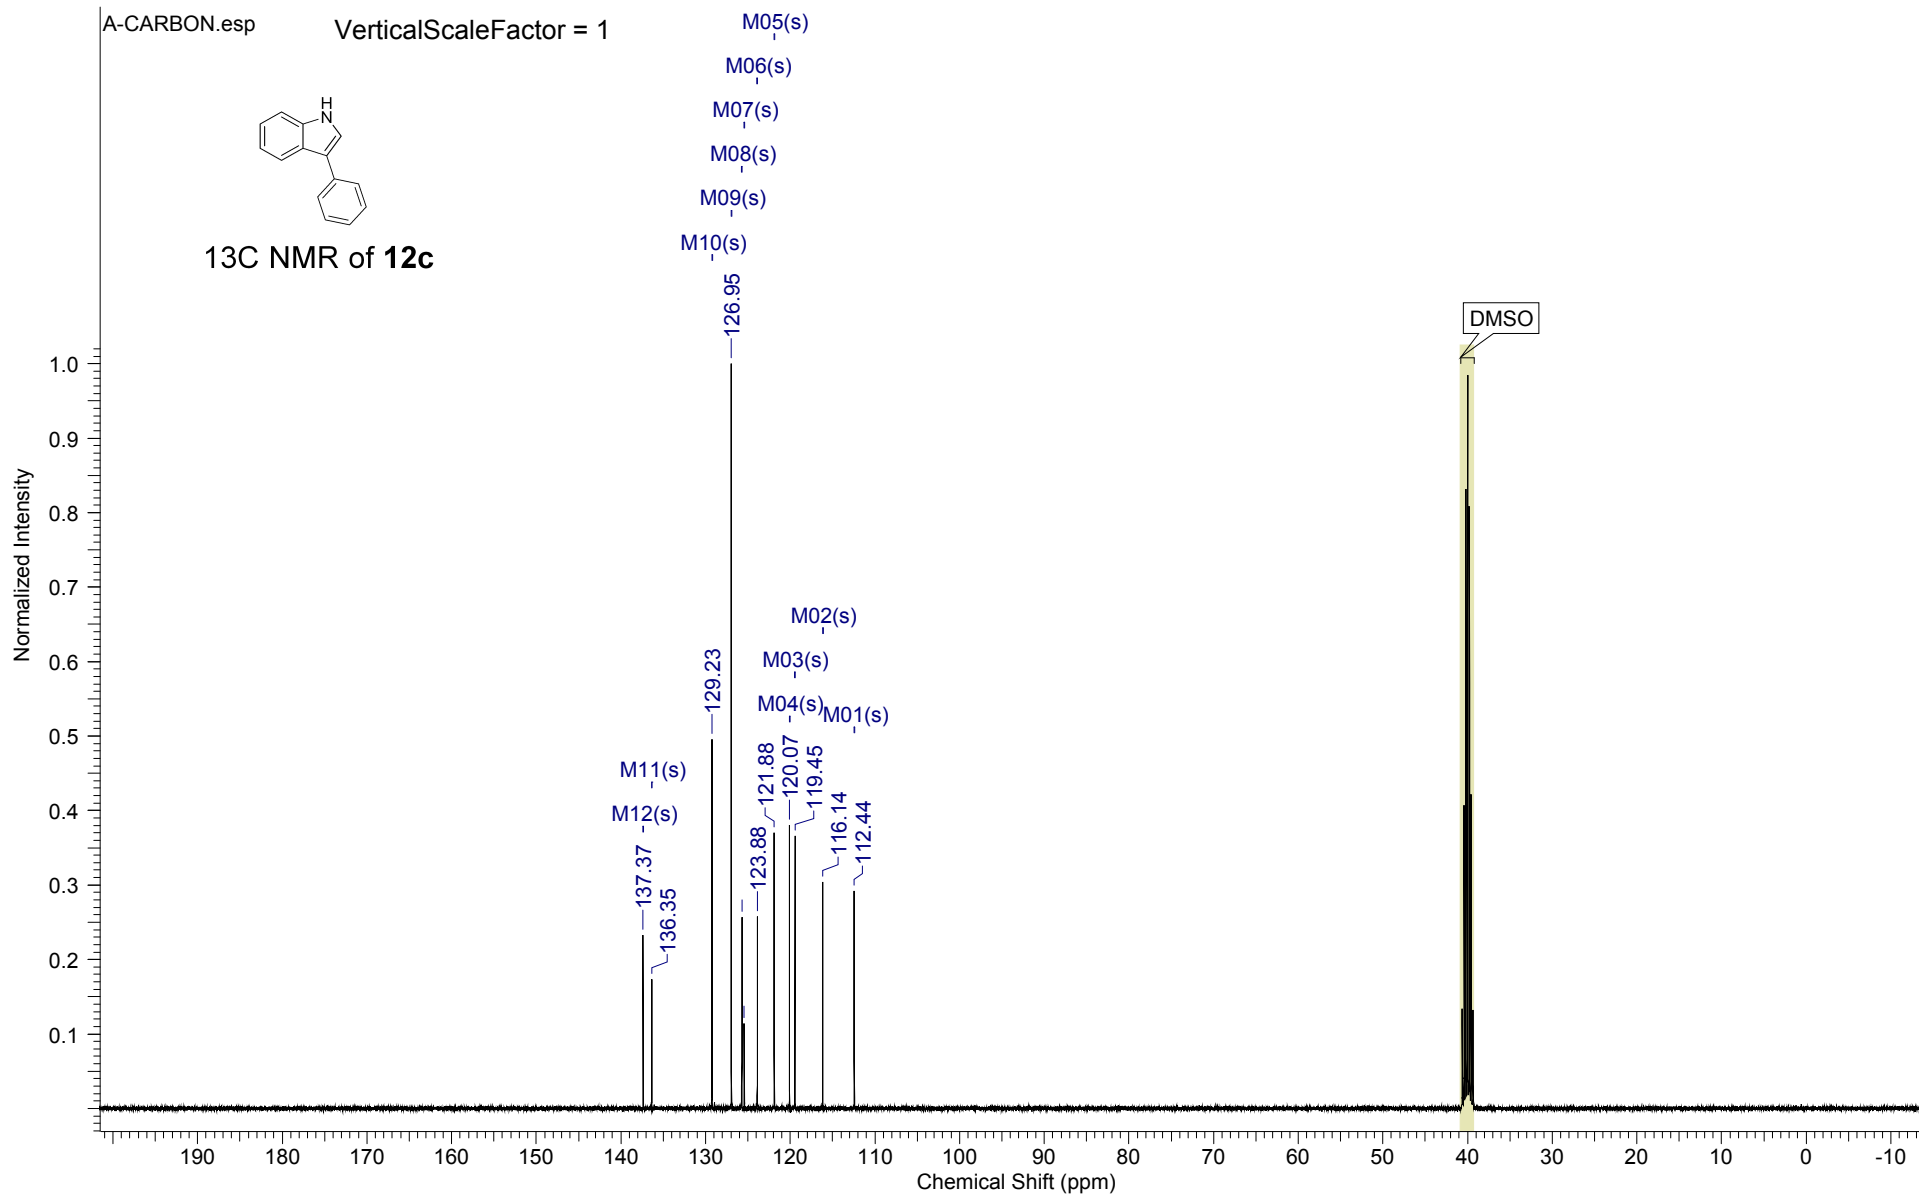

|                               |                       |                               |                        |                   |                      |                             |                             |                       |          |
|-------------------------------|-----------------------|-------------------------------|------------------------|-------------------|----------------------|-----------------------------|-----------------------------|-----------------------|----------|
| <b>Acquisition Time (sec)</b> | 4.0894                | <b>Date</b>                   | 21 Jul 2017 08:19:28   | <b>Date Stamp</b> | 21 Jul 2017 08:19:28 |                             |                             |                       |          |
| <b>File Name</b>              | D:\NMR\CJO\CJO-N1\fid |                               | <b>Frequency (MHz)</b> | 400.15            | <b>Nucleus</b>       | 1H                          | <b>Number of Transients</b> | 32                    |          |
| <b>Origin</b>                 | spect                 | <b>Original Points Count</b>  | 32768                  | <b>Owner</b>      | IND-NMR              | <b>Points Count</b>         | 32768                       | <b>Pulse Sequence</b> | zg30     |
| <b>Receiver Gain</b>          | 196.40                | <b>SW(cyclical) (Hz)</b>      | 8012.82                | <b>Solvent</b>    | DMSO-d6              | <b>Spectrum Offset (Hz)</b> | 2470.9260                   | <b>Spectrum Type</b>  | STANDARD |
| <b>Sweep Width (Hz)</b>       | 8012.58               | <b>Temperature (degree C)</b> | 22.620                 |                   |                      |                             |                             |                       |          |

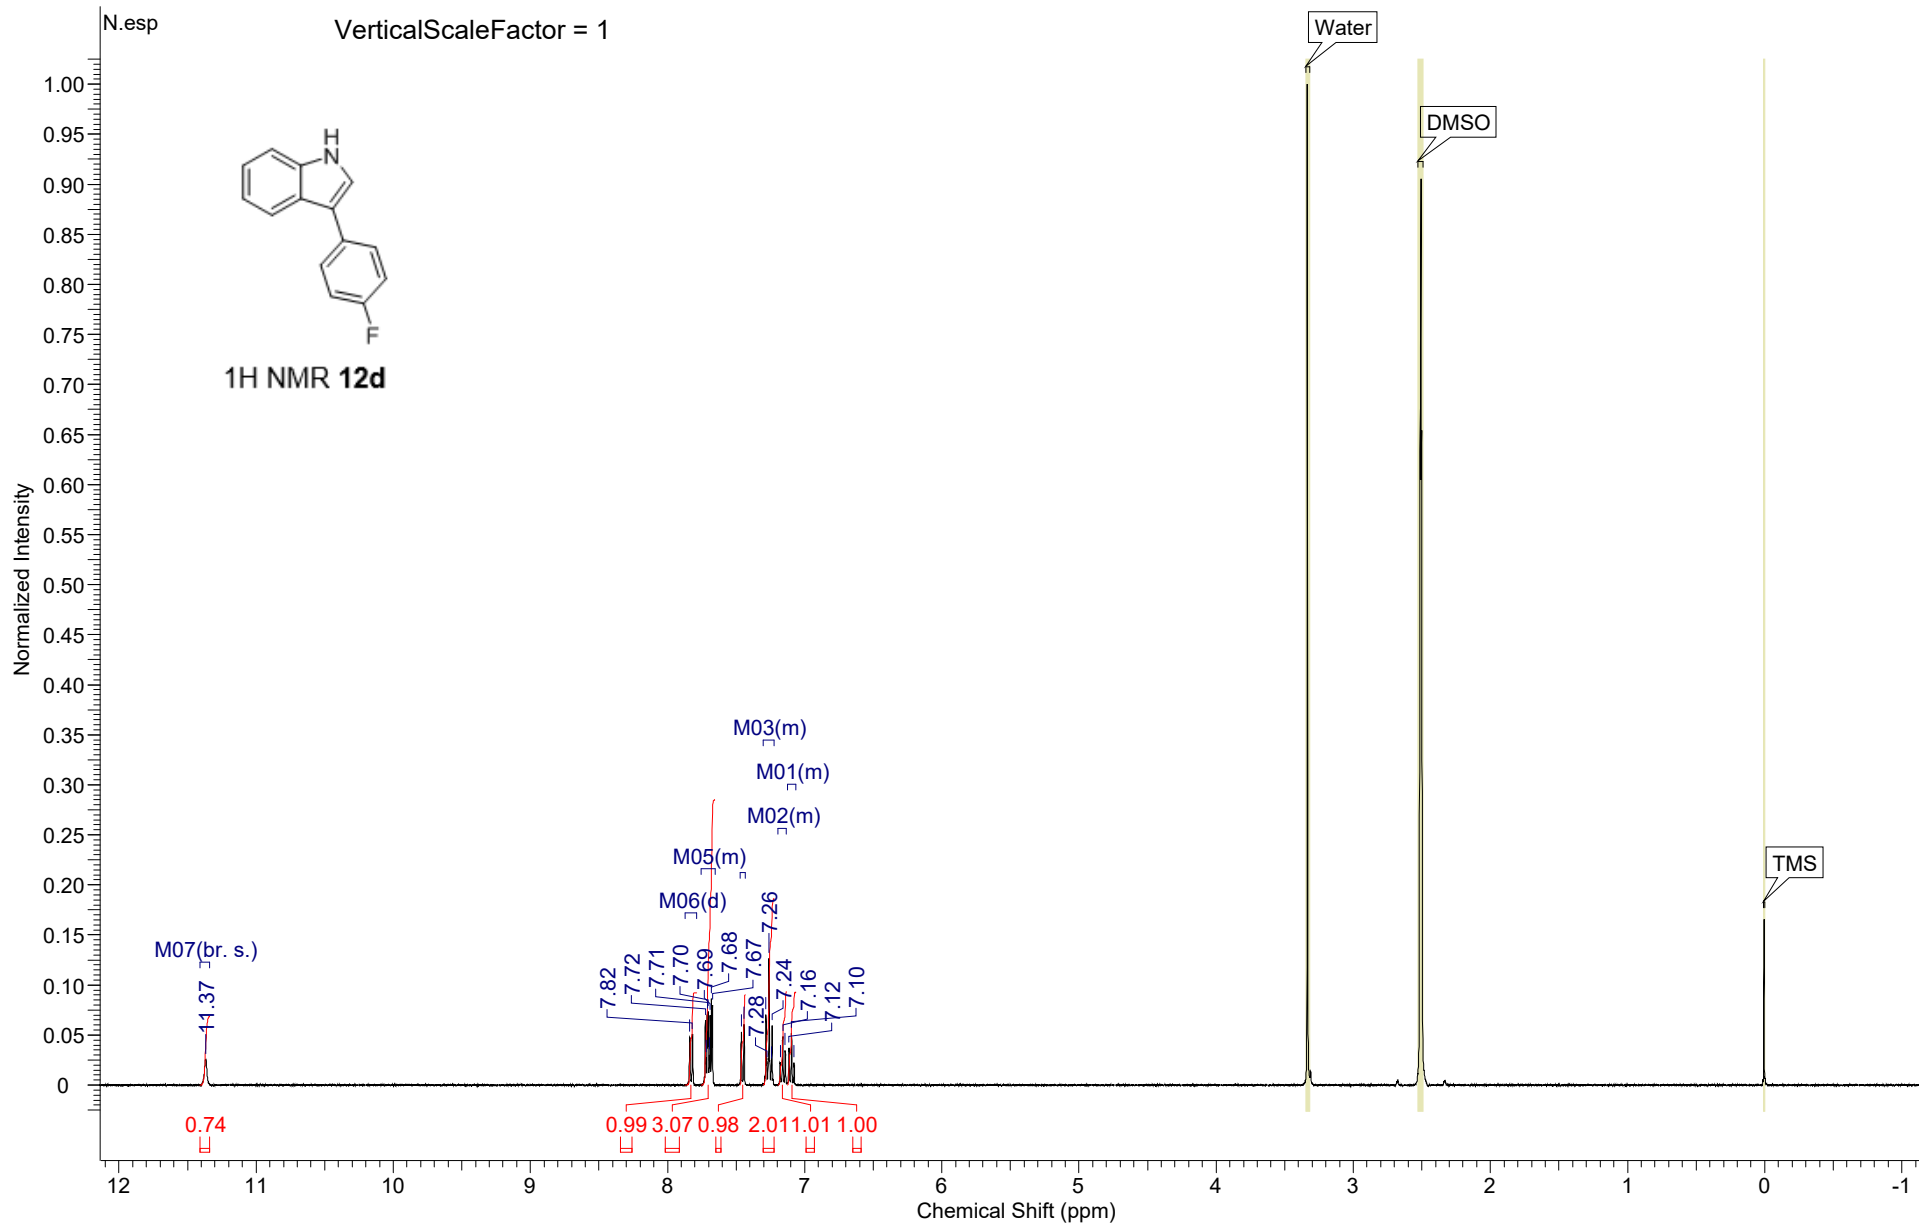



|                               |                             |                               |                      |                              |                      |
|-------------------------------|-----------------------------|-------------------------------|----------------------|------------------------------|----------------------|
| <b>Acquisition Time (sec)</b> | 1.3631                      | <b>Date</b>                   | 29 Jul 2017 03:48:32 | <b>Date Stamp</b>            | 29 Jul 2017 03:48:32 |
| <b>File Name</b>              | D:\NMR\CJO\CJO-NICARBON\fid | <b>Frequency (MHz)</b>        | 100.63               | <b>Nucleus</b>               | 13C                  |
| <b>Number of Transients</b>   | 3000                        | <b>Origin</b>                 | spect                | <b>Original Points Count</b> | 32768                |
| <b>Points Count</b>           | 32768                       | <b>Pulse Sequence</b>         | zgpg30               | <b>Receiver Gain</b>         | 196.40               |
| <b>Solvent</b>                | DMSO-d6                     | <b>Spectrum Offset (Hz)</b>   | 10061.7803           | <b>SW(cyclical) (Hz)</b>     | 24038.46             |
| <b>Sweep Width (Hz)</b>       | 24037.73                    | <b>Temperature (degree C)</b> | 23.327               | <b>Spectrum Type</b>         | STANDARD             |

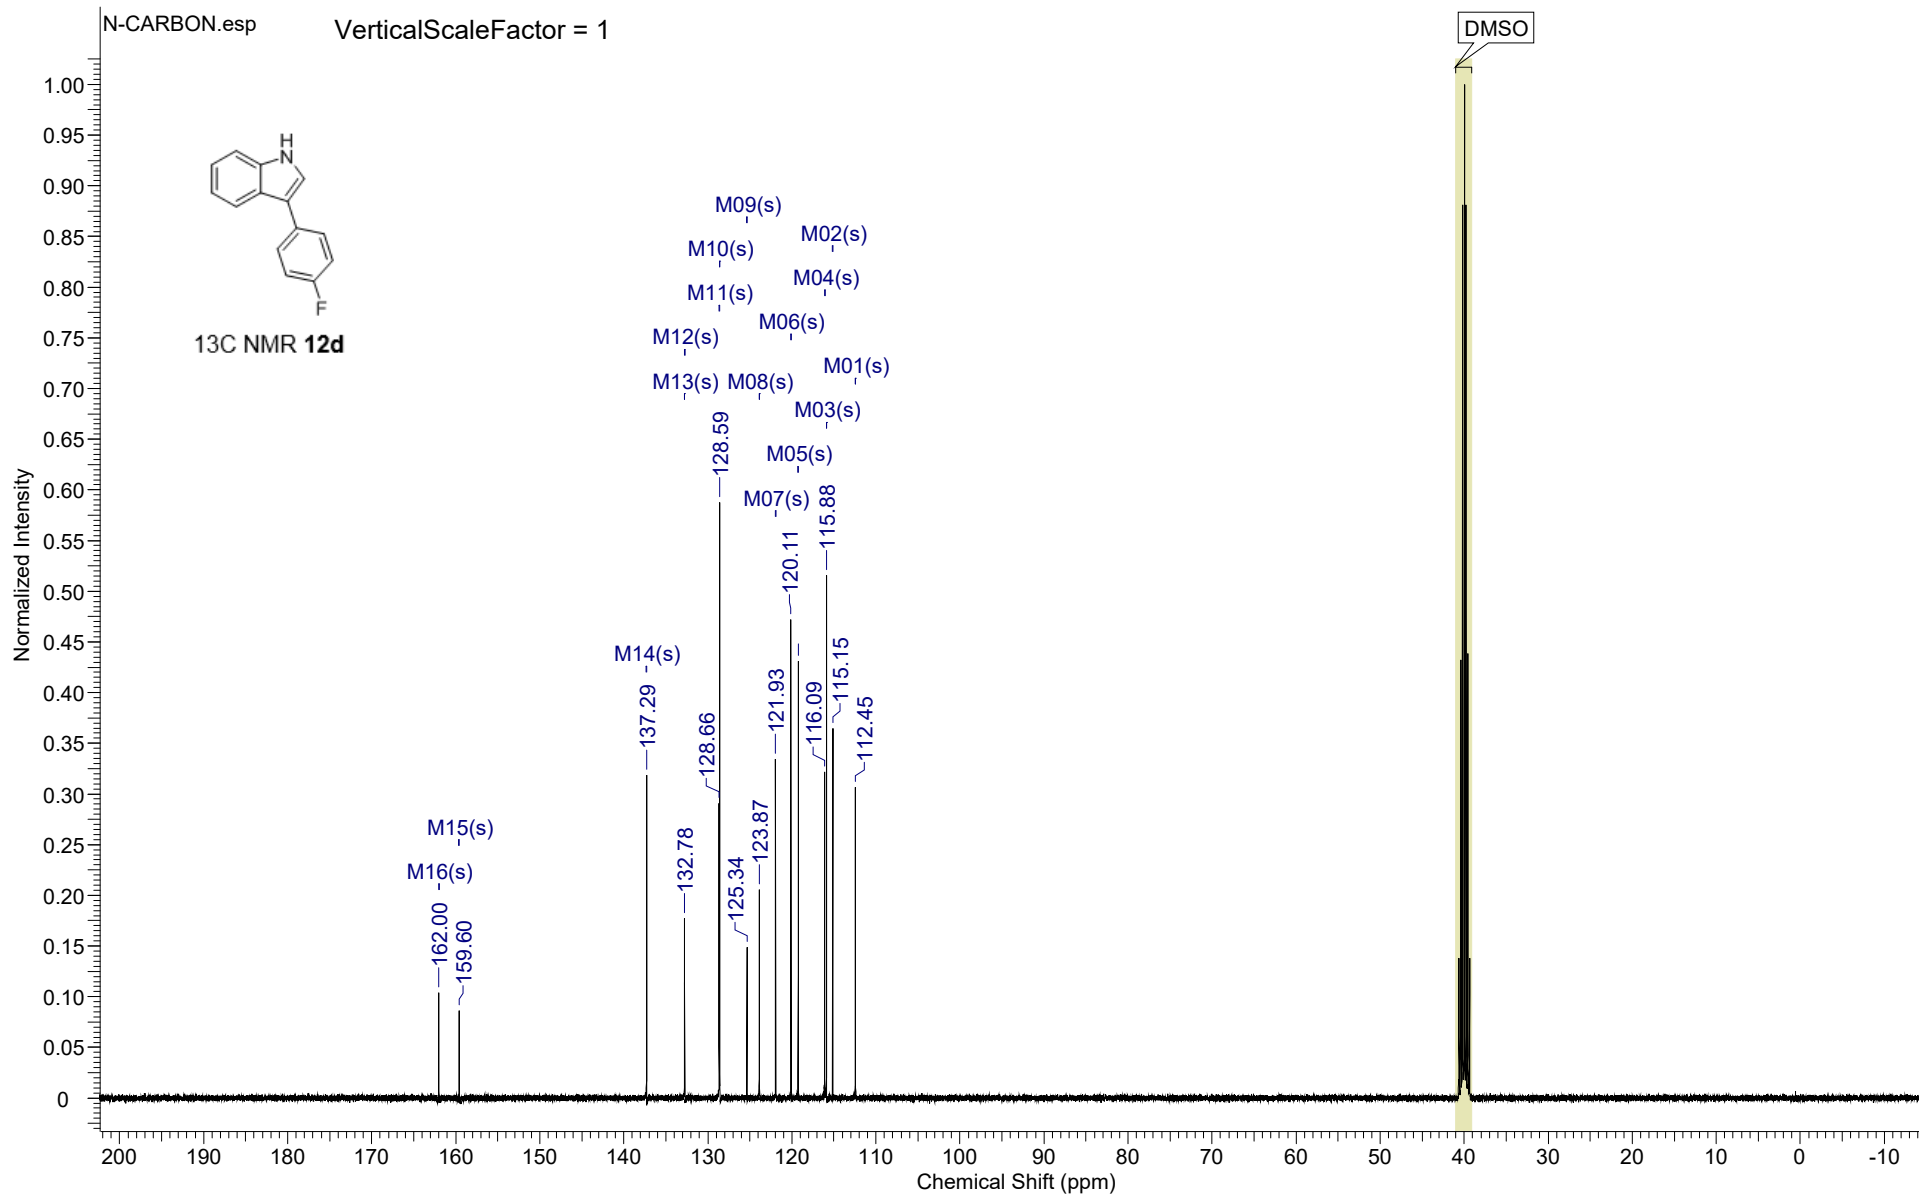

|                        |                        |                        |                      |                      |                      |
|------------------------|------------------------|------------------------|----------------------|----------------------|----------------------|
| Acquisition Time (sec) | 4.0894                 | Date                   | 02 Aug 2017 09:00:00 | Date Stamp           | 02 Aug 2017 09:00:00 |
| File Name              | D:\NMR\CJO\CJO-O\1\fid | Frequency (MHz)        | 400.15               | Nucleus              | <sup>1</sup> H       |
| Origin                 | spect                  | Original Points Count  | 32768                | Owner                | IND-NMR              |
| Receiver Gain          | 97.12                  | SW(cyclical) (Hz)      | 8012.82              | Points Count         | 32768                |
| Sweep Width (Hz)       | 8012.58                | Solvent                | DMSO-d6              | Spectrum Offset (Hz) | 2470.9260            |
|                        |                        | Temperature (degree C) | 22.626               | Pulse Sequence       | zg30                 |
|                        |                        |                        |                      | Spectrum Type        | STANDARD             |

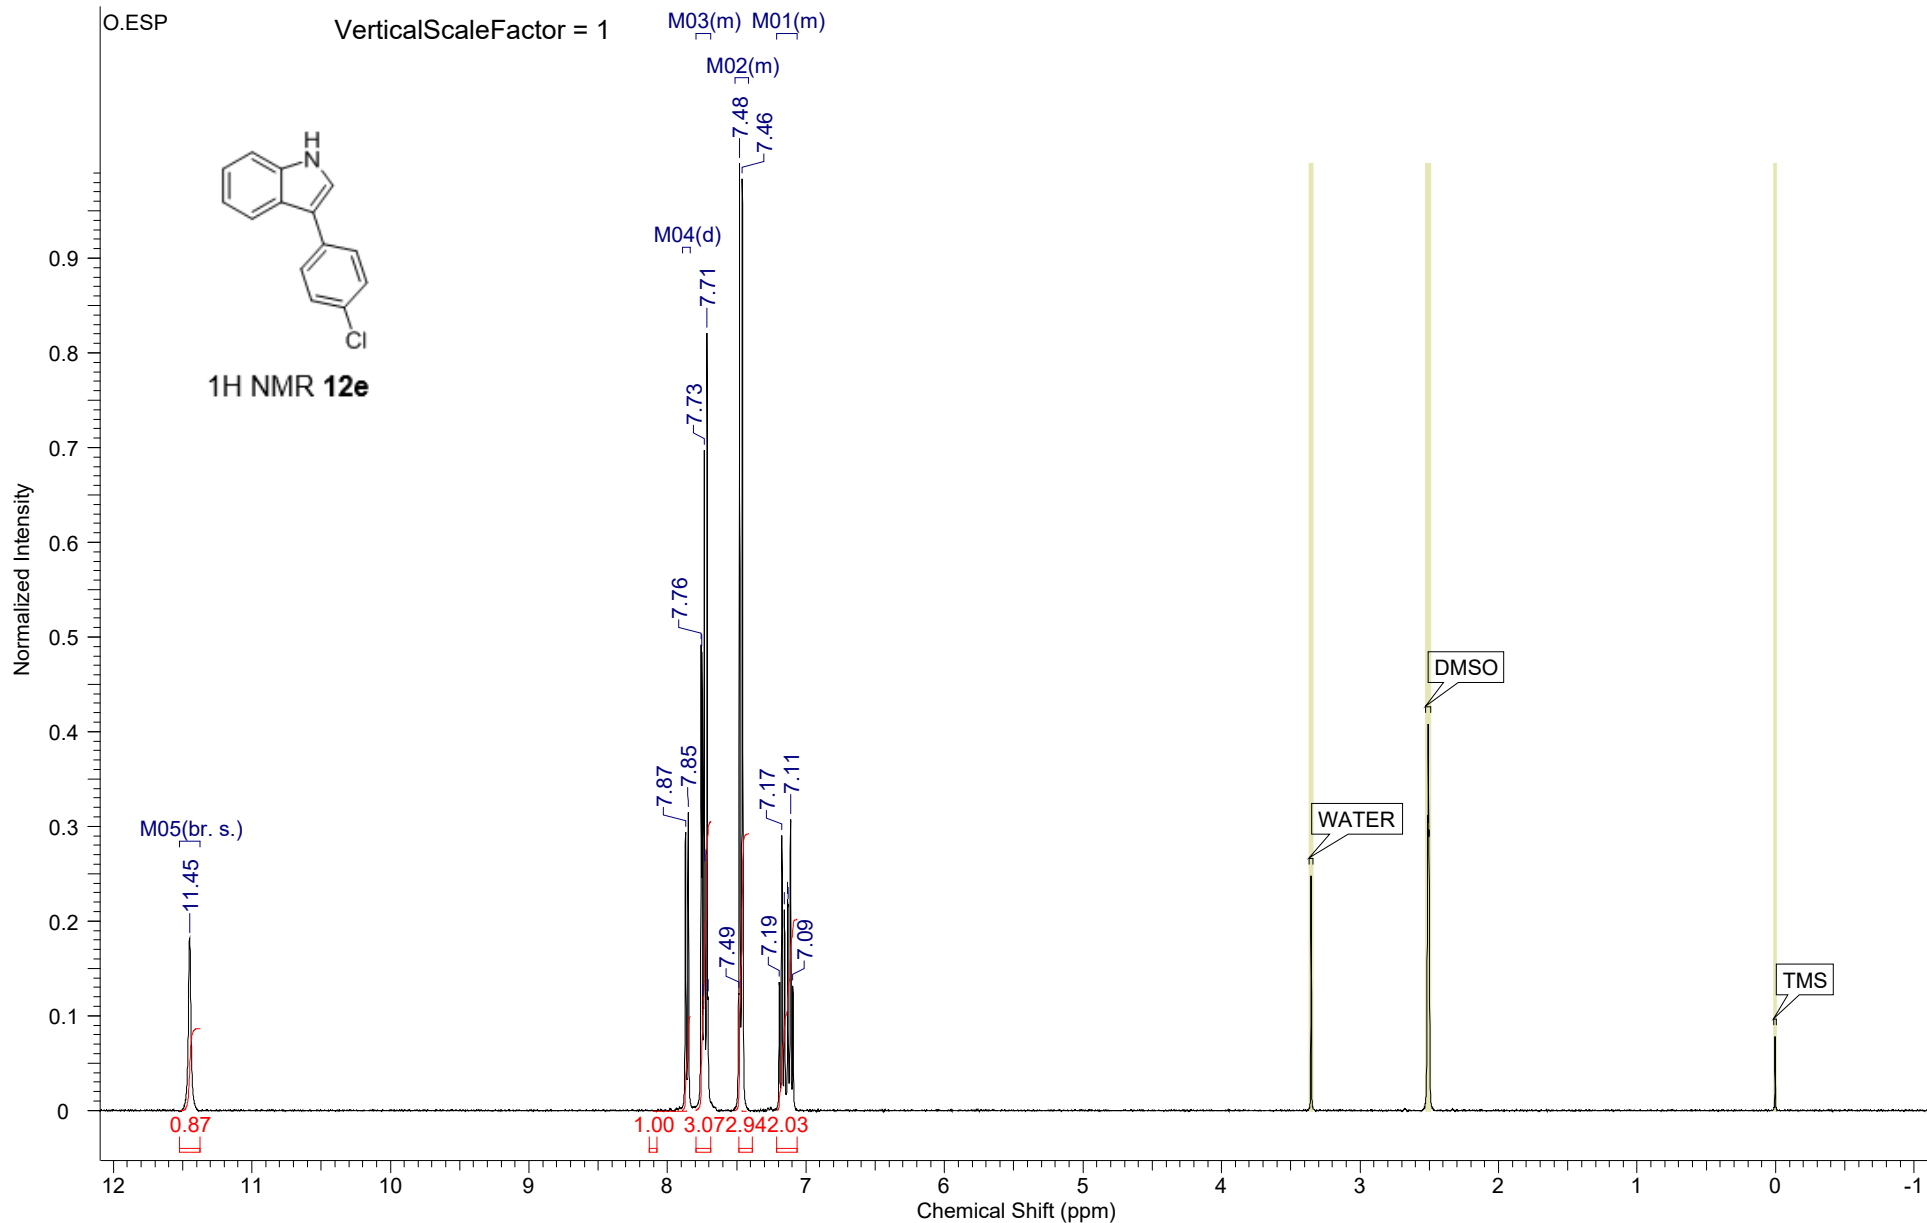

|                        |                             |                      |                      |                       |                      |
|------------------------|-----------------------------|----------------------|----------------------|-----------------------|----------------------|
| Acquisition Time (sec) | 1.3631                      | Date                 | 03 Aug 2017 01:51:12 | Date Stamp            | 03 Aug 2017 01:51:12 |
| File Name              | D:\NMR\CJO\CJO-O\CARBON\fid | Frequency (MHz)      | 100.63               | Nucleus               | 13C                  |
| Number of Transients   | 4000                        | Origin               | spect                | Original Points Count | 32768                |
| Points Count           | 32768                       | Pulse Sequence       | zgpg30               | Receiver Gain         | 196.40               |
| Solvent                | DMSO-d6                     | Spectrum Offset (Hz) | 10061.7803           | Spectrum Type         | STANDARD             |
| Temperature (degree C) | 23.281                      | SW(cyclical) (Hz)    |                      | Sweep Width (Hz)      | 24037.73             |

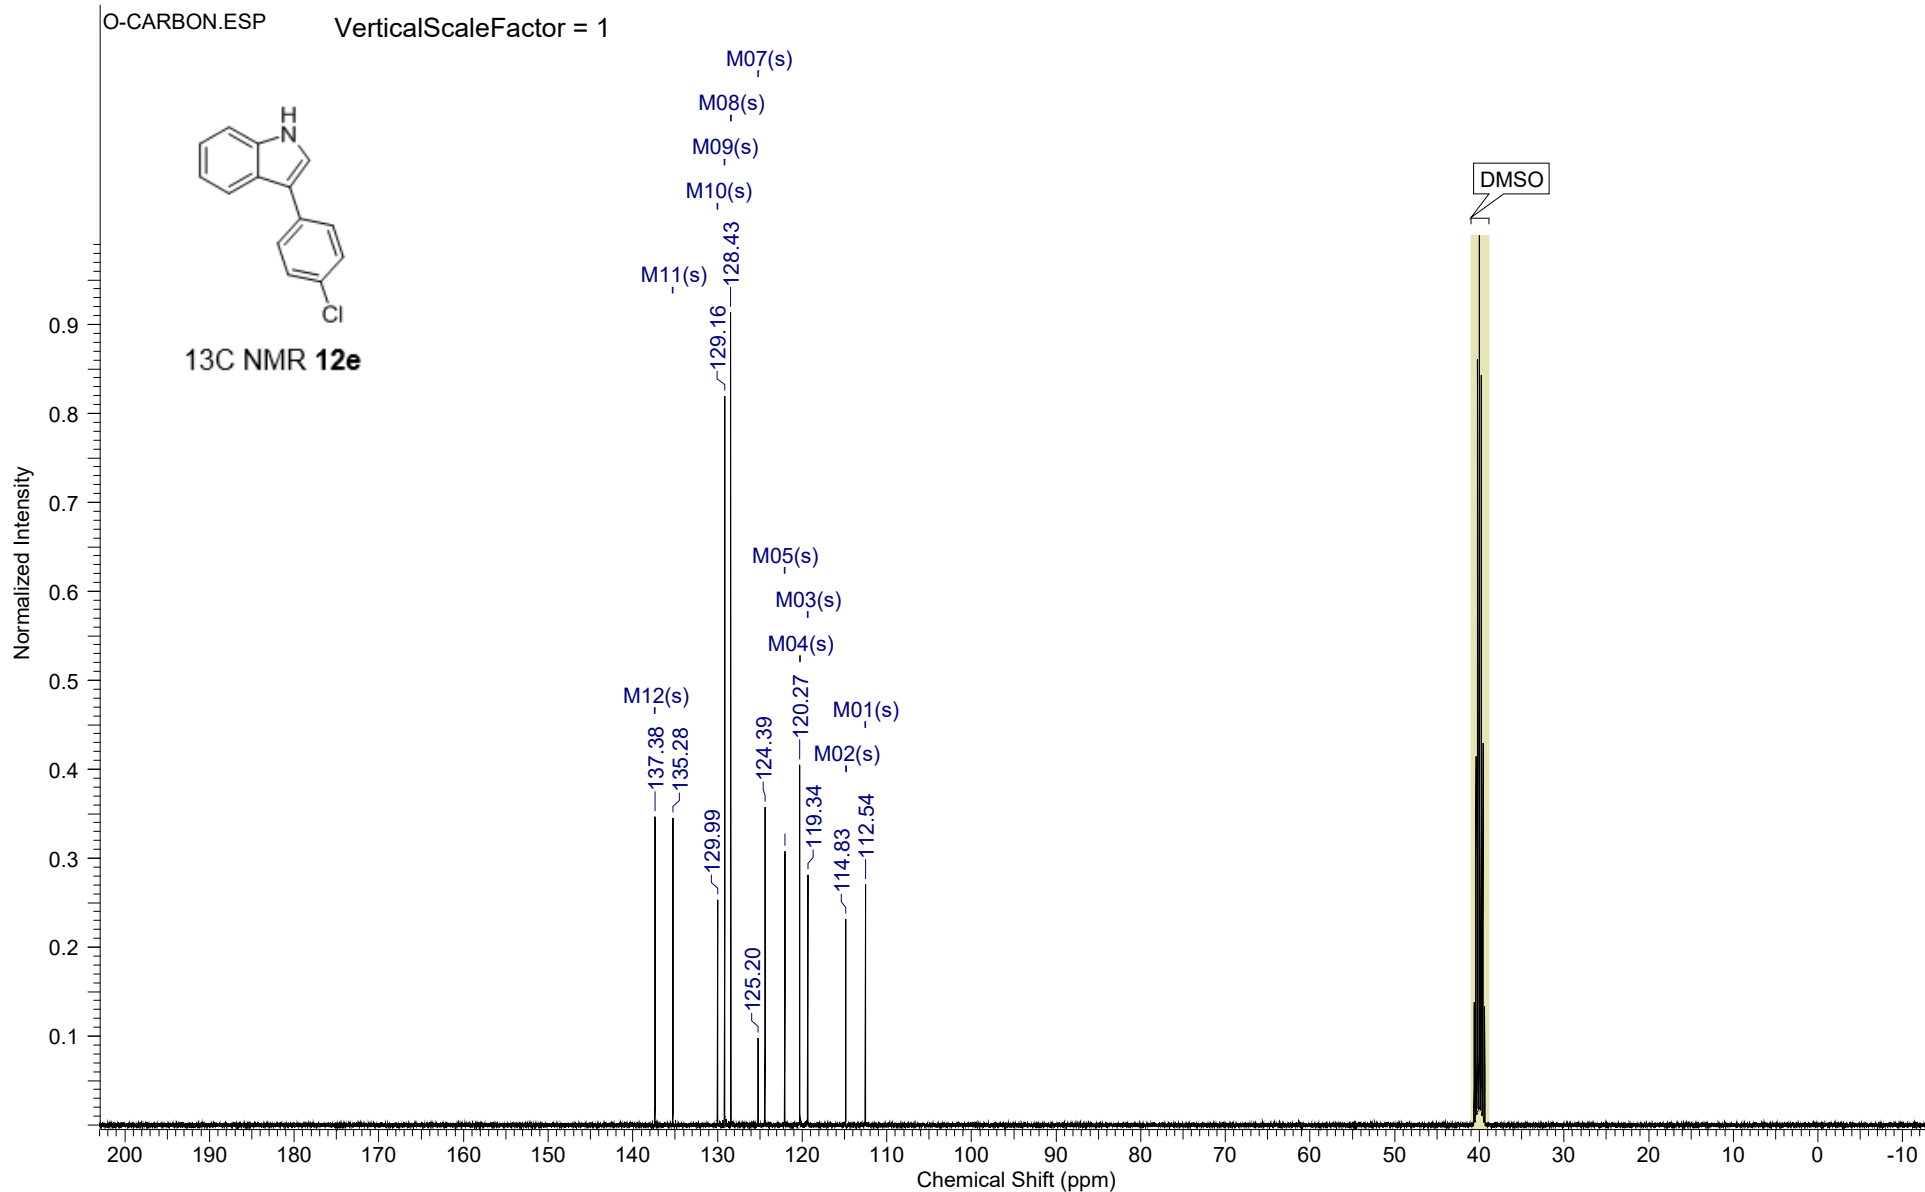

|                               |                       |                               |                        |                   |                      |                             |                             |                       |          |
|-------------------------------|-----------------------|-------------------------------|------------------------|-------------------|----------------------|-----------------------------|-----------------------------|-----------------------|----------|
| <b>Acquisition Time (sec)</b> | 4.0894                | <b>Date</b>                   | 21 Jul 2017 08:23:44   | <b>Date Stamp</b> | 21 Jul 2017 08:23:44 |                             |                             |                       |          |
| <b>File Name</b>              | D:\NMR\CJO\CJO-P1\fid |                               | <b>Frequency (MHz)</b> | 400.15            | <b>Nucleus</b>       | 1H                          | <b>Number of Transients</b> | 32                    |          |
| <b>Origin</b>                 | spect                 | <b>Original Points Count</b>  | 32768                  | <b>Owner</b>      | IND-NMR              | <b>Points Count</b>         | 32768                       | <b>Pulse Sequence</b> | zg30     |
| <b>Receiver Gain</b>          | 141.25                | <b>SW(cyclical) (Hz)</b>      | 8012.82                | <b>Solvent</b>    | DMSO-d6              | <b>Spectrum Offset (Hz)</b> | 2470.9260                   | <b>Spectrum Type</b>  | STANDARD |
| <b>Sweep Width (Hz)</b>       | 8012.58               | <b>Temperature (degree C)</b> | 22.619                 |                   |                      |                             |                             |                       |          |

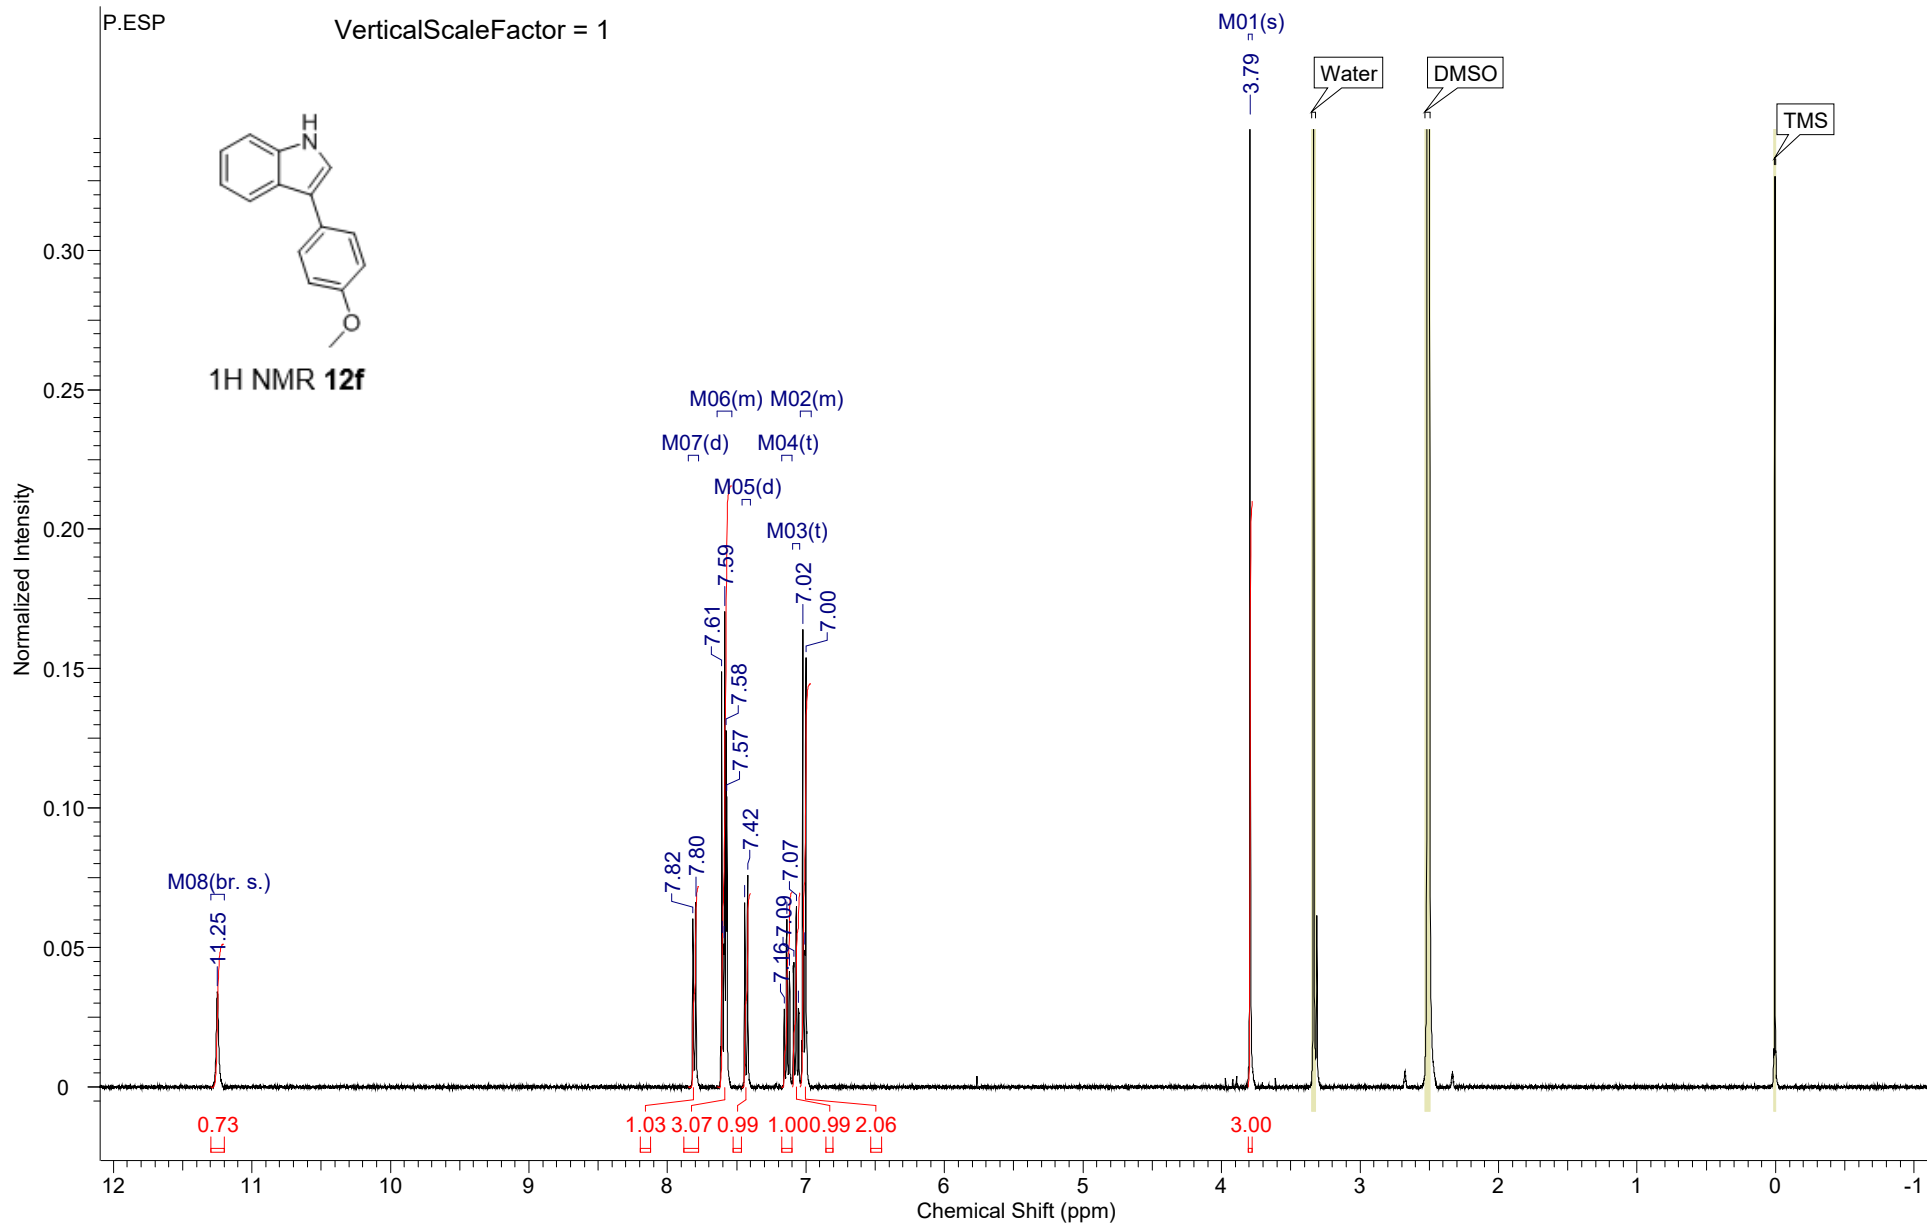

|                               |                              |                               |                      |                              |                      |
|-------------------------------|------------------------------|-------------------------------|----------------------|------------------------------|----------------------|
| <b>Acquisition Time (sec)</b> | 1.3631                       | <b>Date</b>                   | 28 Jul 2017 05:41:36 | <b>Date Stamp</b>            | 28 Jul 2017 05:41:36 |
| <b>File Name</b>              | D:\NMR\CJO\CJO-PI\CARBON\fid | <b>Frequency (MHz)</b>        | 100.63               | <b>Nucleus</b>               | 13C                  |
| <b>Number of Transients</b>   | 4000                         | <b>Origin</b>                 | spect                | <b>Original Points Count</b> | 32768                |
| <b>Points Count</b>           | 32768                        | <b>Pulse Sequence</b>         | zgpg30               | <b>Receiver Gain</b>         | 196.40               |
| <b>Solvent</b>                | DMSO-d6                      | <b>Spectrum Offset (Hz)</b>   | 10061.7803           | <b>SW(cyclical) (Hz)</b>     | 24038.46             |
| <b>Sweep Width (Hz)</b>       | 24037.73                     | <b>Temperature (degree C)</b> | 23.007               | <b>Spectrum Type</b>         | STANDARD             |

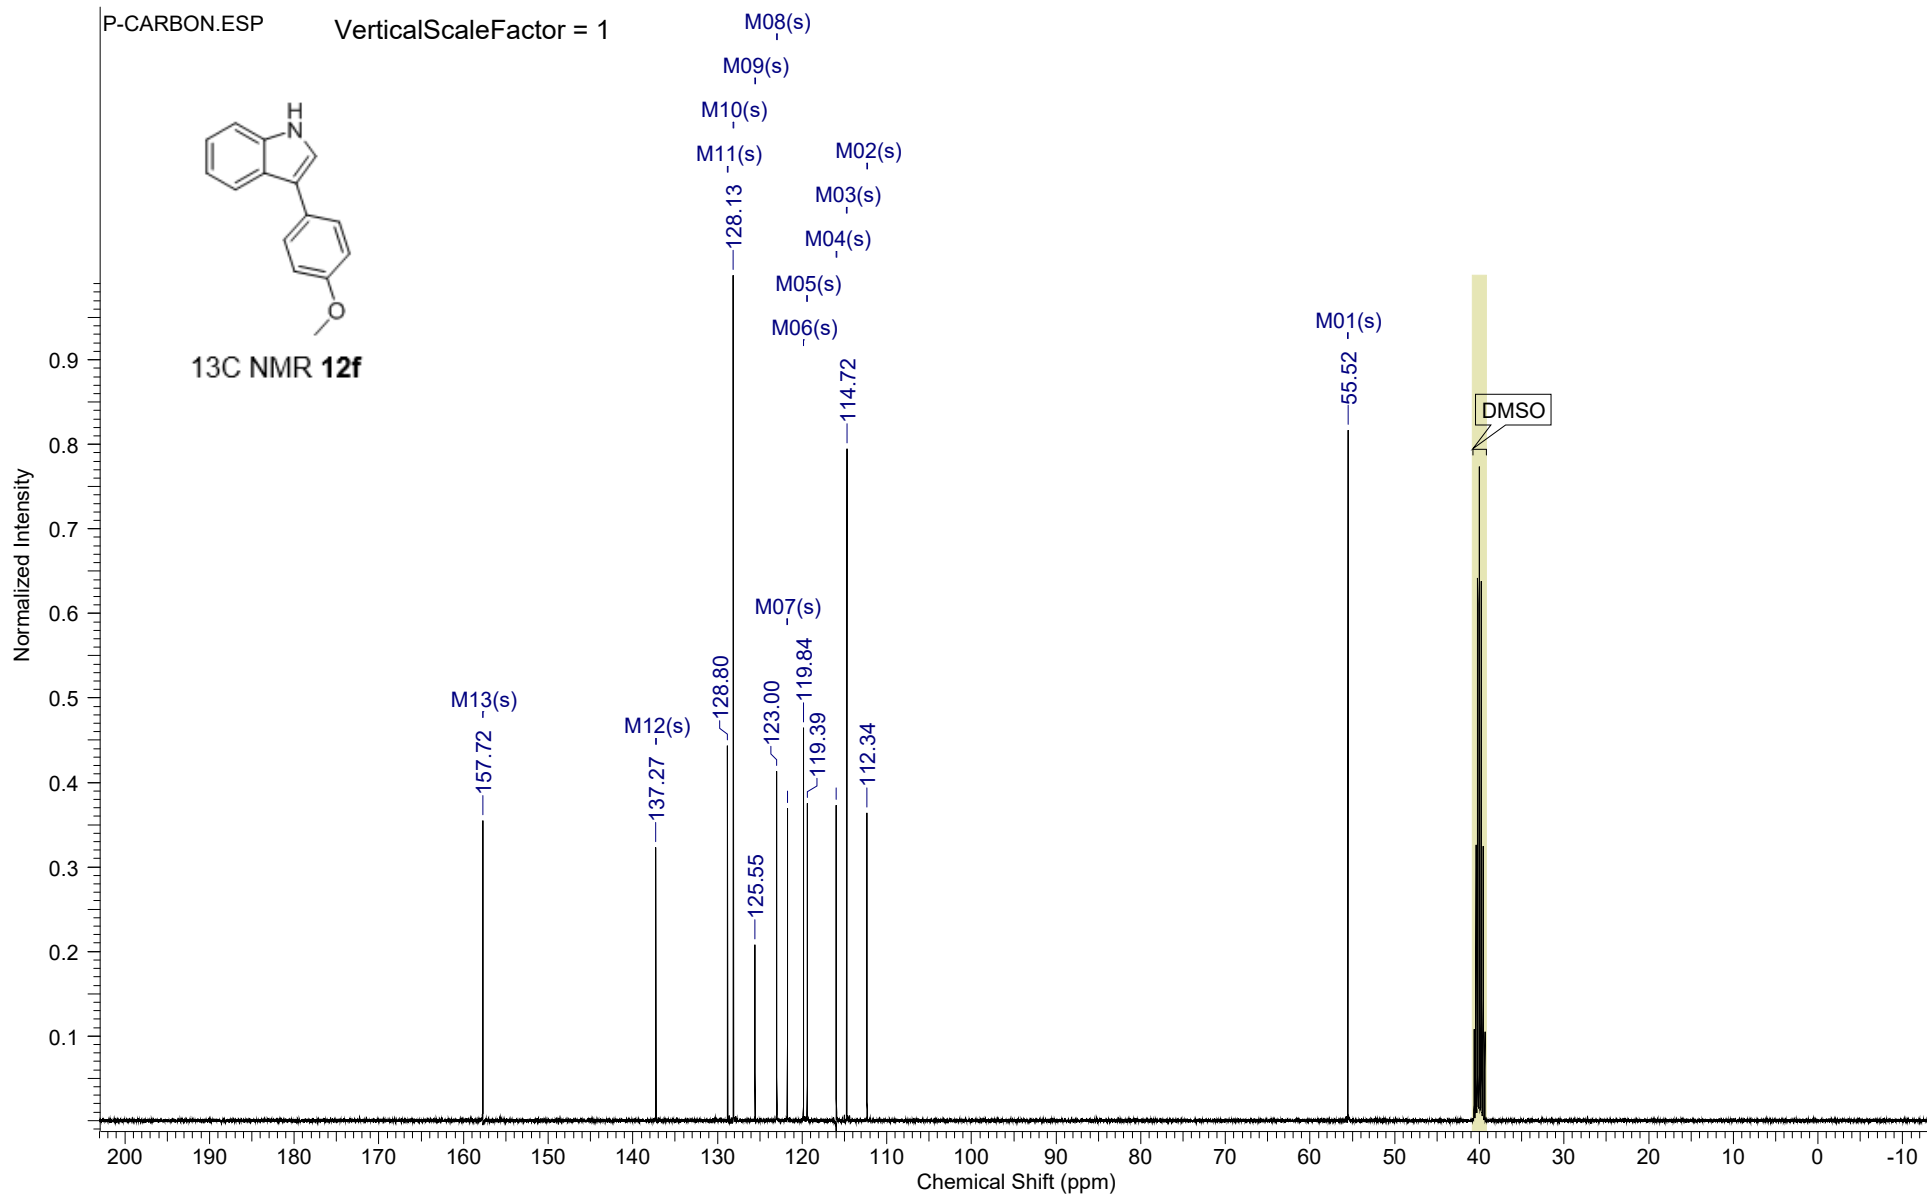

|                        |                       |                        |                      |                      |                      |
|------------------------|-----------------------|------------------------|----------------------|----------------------|----------------------|
| Acquisition Time (sec) | 4.0894                | Date                   | 03 Aug 2017 09:27:44 | Date Stamp           | 03 Aug 2017 09:27:44 |
| File Name              | D:\NMR\CJO\CJO-R1\fid | Frequency (MHz)        | 400.15               | Nucleus              | <sup>1</sup> H       |
| Origin                 | spect                 | Original Points Count  | 32768                | Owner                | IND-NMR              |
| Receiver Gain          | 97.12                 | SW(cyclical) (Hz)      | 8012.82              | Points Count         | 32768                |
| Sweep Width (Hz)       | 8012.58               | Solvent                | DMSO-d6              | Spectrum Offset (Hz) | 2470.9260            |
|                        |                       | Temperature (degree C) | 22.620               | Pulse Sequence       | zg30                 |
|                        |                       |                        |                      | Spectrum Type        | STANDARD             |

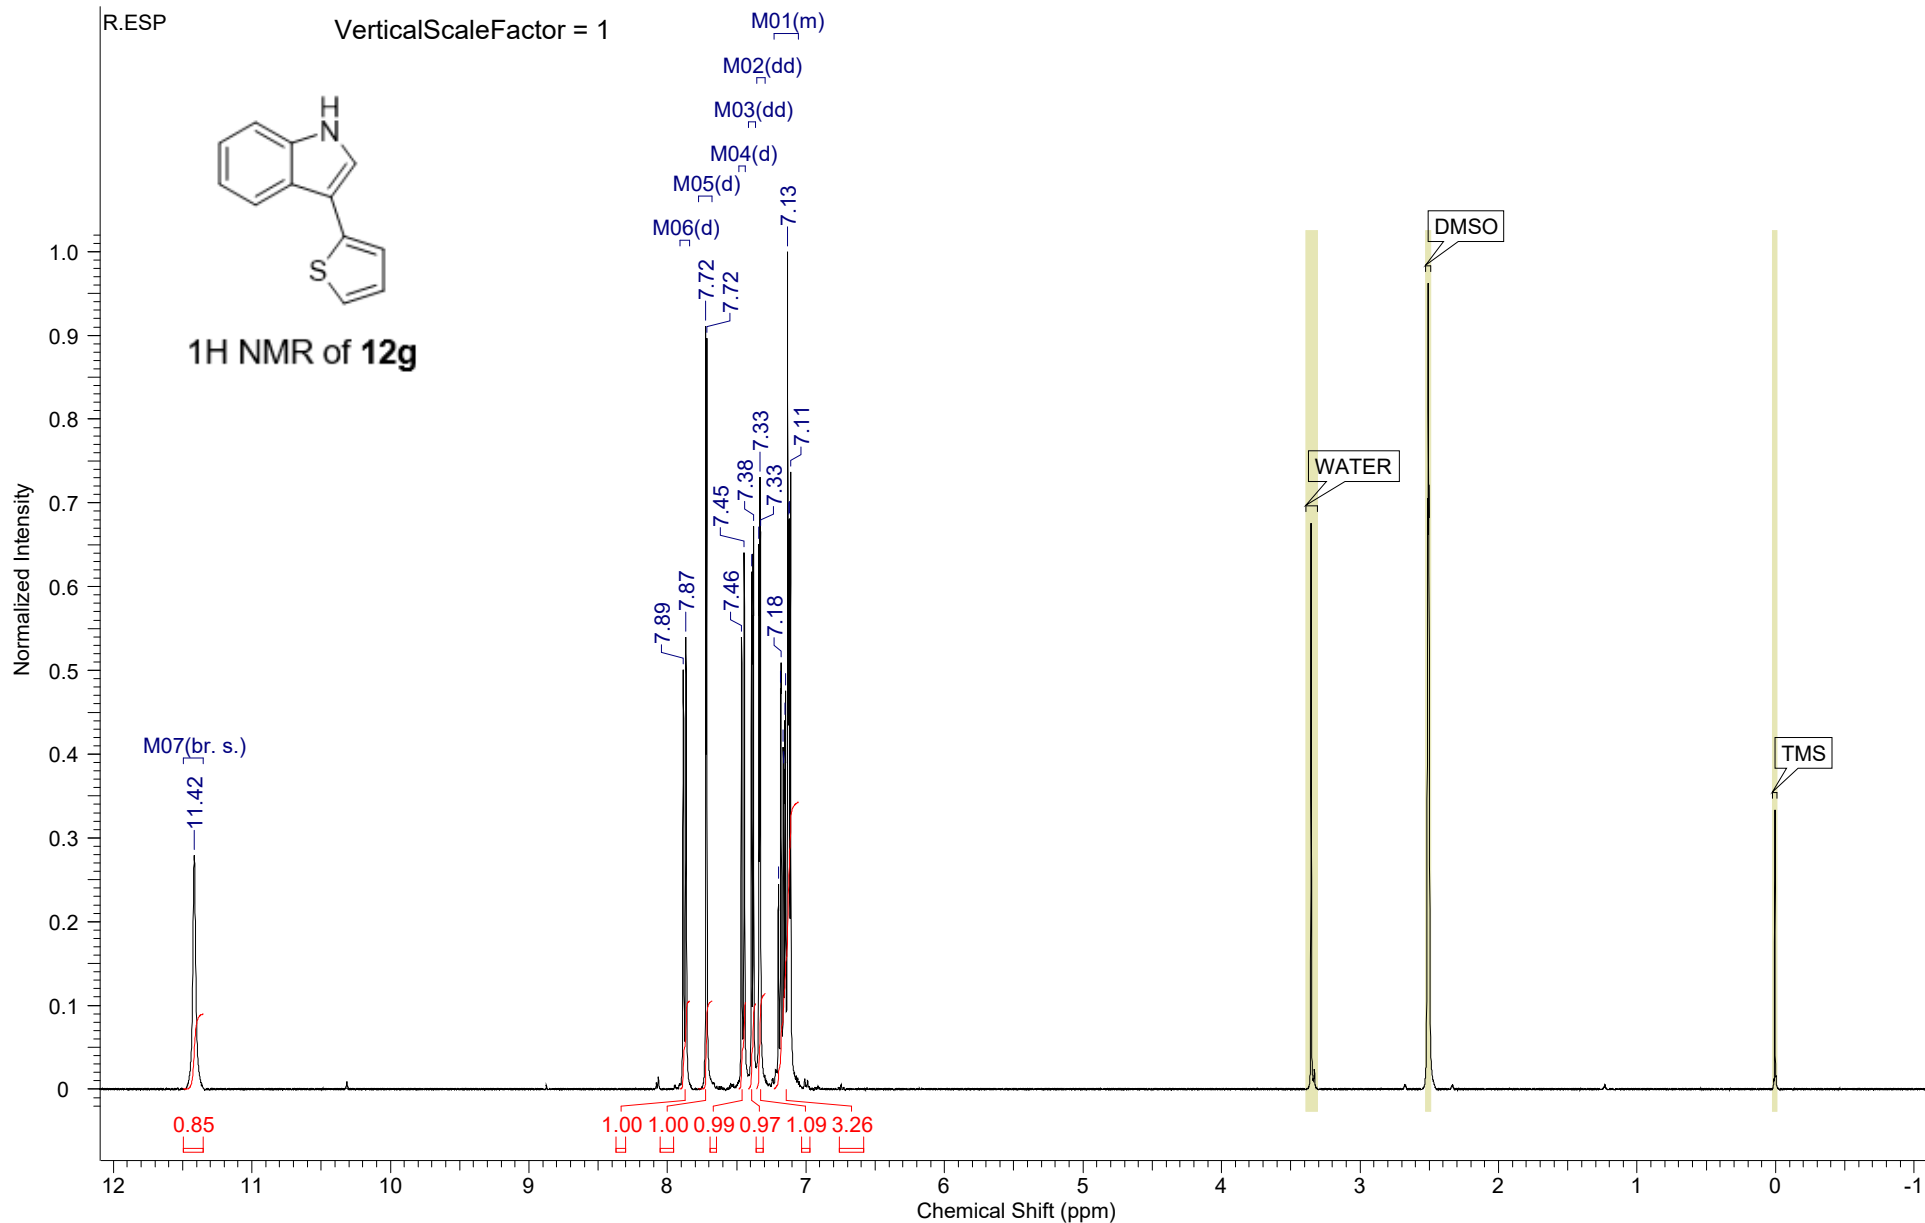

|                               |                             |                             |                      |                              |                      |
|-------------------------------|-----------------------------|-----------------------------|----------------------|------------------------------|----------------------|
| <b>Acquisition Time (sec)</b> | 1.3631                      | <b>Date</b>                 | 04 Aug 2017 03:48:32 | <b>Date Stamp</b>            | 04 Aug 2017 03:48:32 |
| <b>File Name</b>              | D:\NMR\CJO\CJO-R\CARBON\fid | <b>Frequency (MHz)</b>      | 100.63               | <b>Nucleus</b>               | <sup>13</sup> C      |
| <b>Number of Transients</b>   | 3000                        | <b>Origin</b>               | spect                | <b>Original Points Count</b> | 32768                |
| <b>Points Count</b>           | 32768                       | <b>Pulse Sequence</b>       | zgpg30               | <b>Receiver Gain</b>         | 196.40               |
| <b>Solvent</b>                | DMSO-d6                     | <b>Spectrum Offset (Hz)</b> | 10061.7803           | <b>Spectrum Type</b>         | STANDARD             |
| <b>Temperature (degree C)</b> | 23.440                      |                             |                      | <b>SW(cyclical) (Hz)</b>     | 24038.46             |
|                               |                             |                             |                      | <b>Sweep Width (Hz)</b>      | 24037.73             |

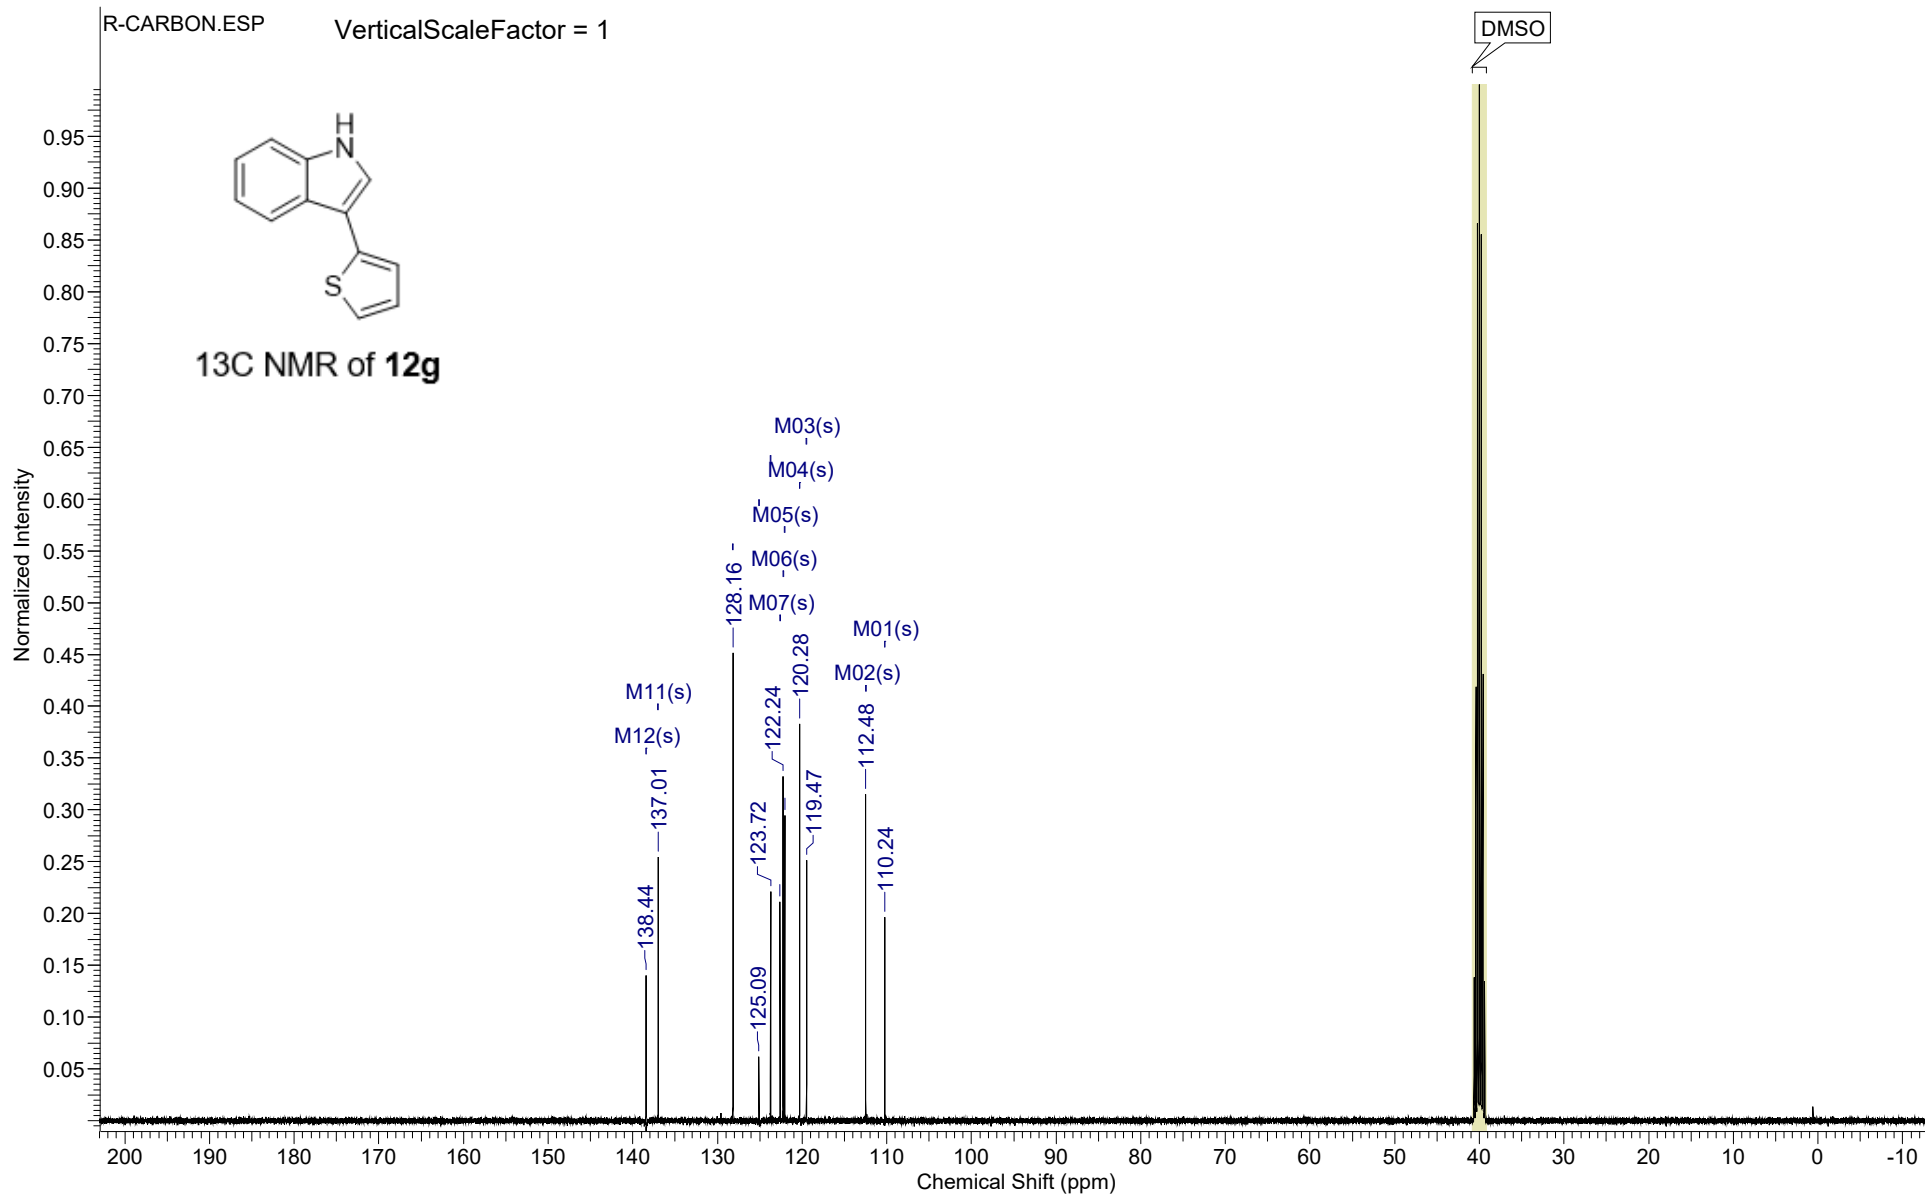

|                               |                                               |                             |                      |                              |                      |
|-------------------------------|-----------------------------------------------|-----------------------------|----------------------|------------------------------|----------------------|
| <b>Acquisition Time (sec)</b> | 4.0894                                        | <b>Date</b>                 | 20 Jul 2017 14:26:24 | <b>Date Stamp</b>            | 20 Jul 2017 14:26:24 |
| <b>File Name</b>              | D:\NMR\New folder\New folder\015-013(H)\1\fid | <b>Frequency (MHz)</b>      | 400.15               | <b>Nucleus</b>               | 1H                   |
| <b>Number of Transients</b>   | 16                                            | <b>Origin</b>               | spect                | <b>Original Points Count</b> | 32768                |
| <b>Points Count</b>           | 32768                                         | <b>Pulse Sequence</b>       | zg30                 | <b>Receiver Gain</b>         | 97.12                |
| <b>Solvent</b>                | DMSO-d6                                       | <b>Spectrum Offset (Hz)</b> | 2470.9255            | <b>Spectrum Type</b>         | STANDARD             |
| <b>Temperature (degree C)</b> | 22.521                                        |                             |                      | <b>SW(cyclical) (Hz)</b>     | 8012.82              |
|                               |                                               |                             |                      | <b>Sweep Width (Hz)</b>      | 8012.58              |

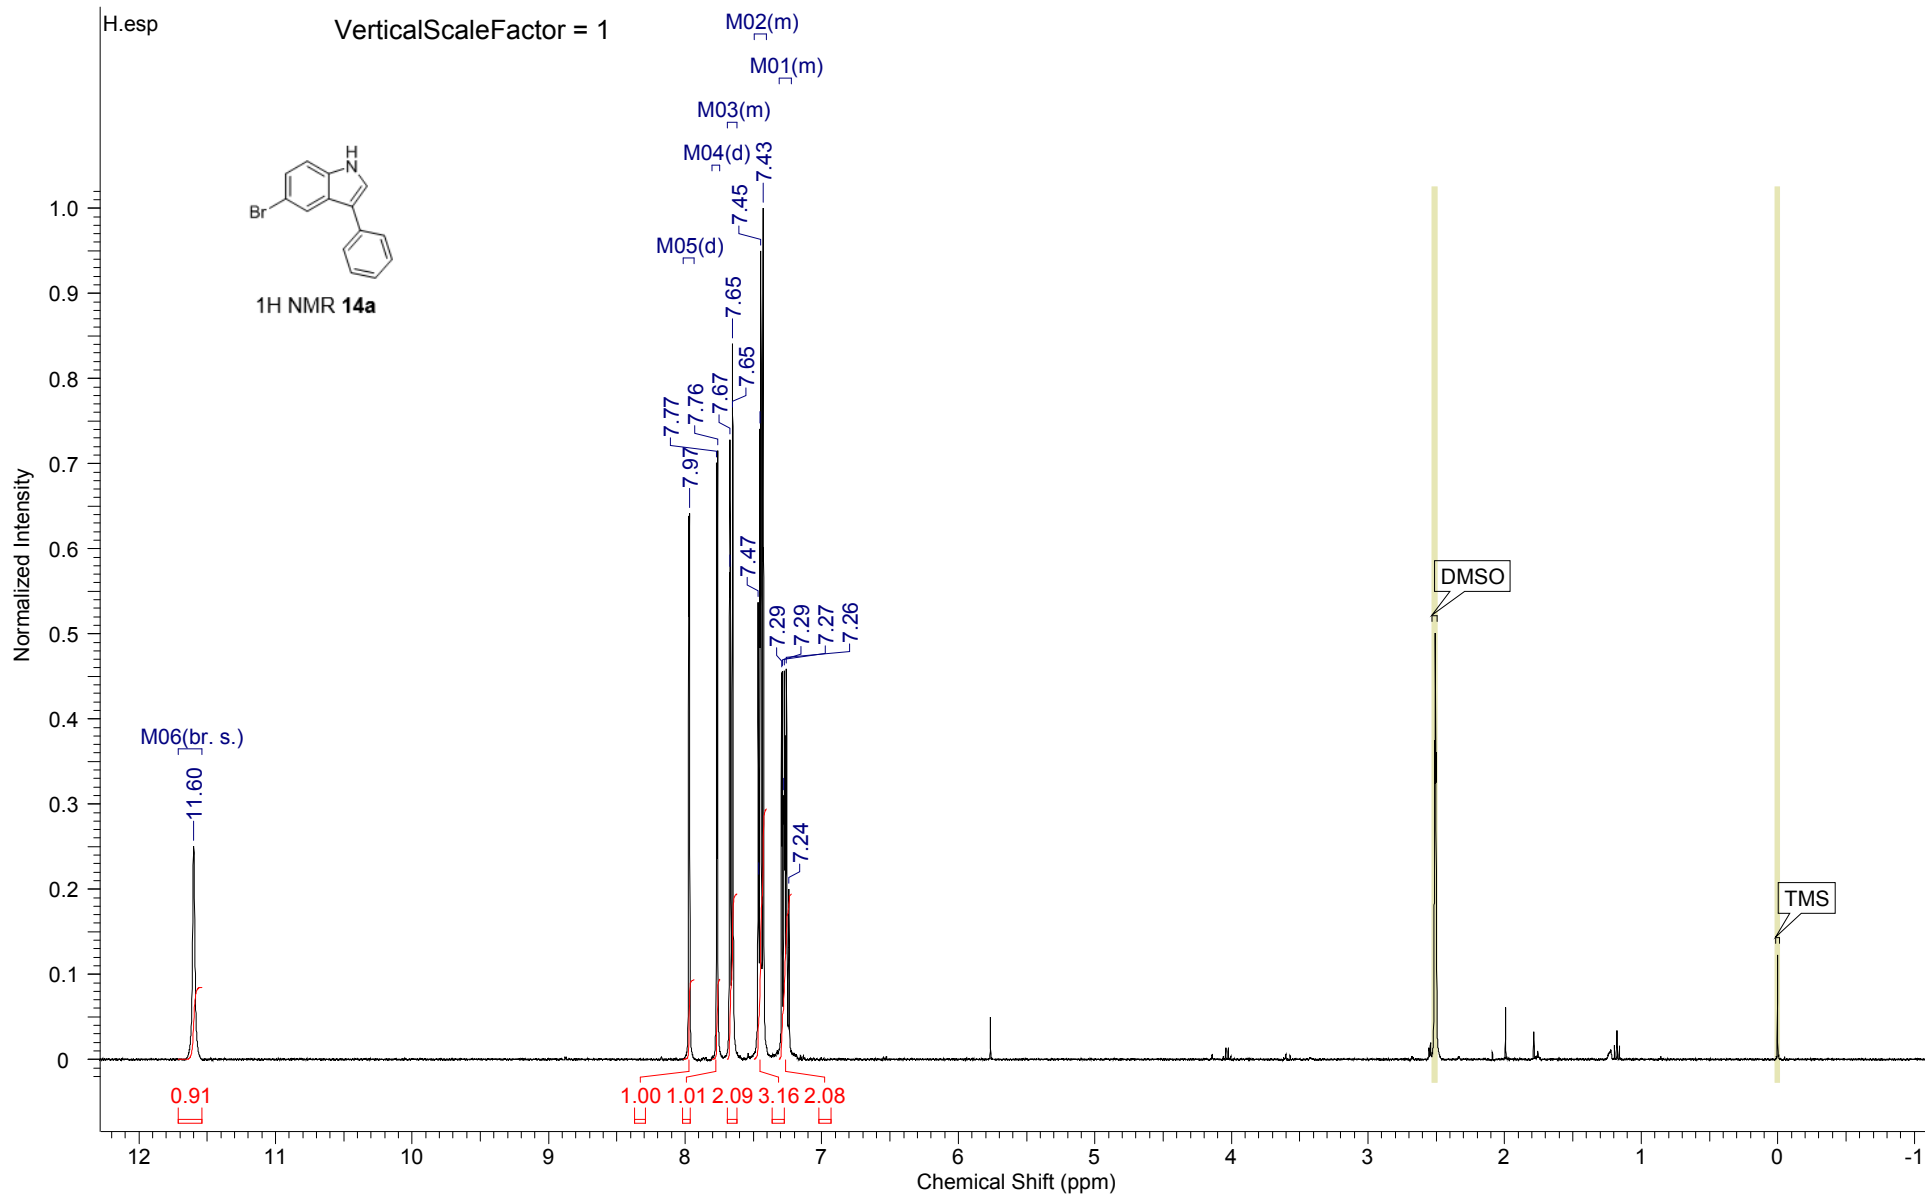



|                               |                             |                               |                      |                              |                      |
|-------------------------------|-----------------------------|-------------------------------|----------------------|------------------------------|----------------------|
| <b>Acquisition Time (sec)</b> | 1.3631                      | <b>Date</b>                   | 29 Jul 2017 15:21:52 | <b>Date Stamp</b>            | 29 Jul 2017 15:21:52 |
| <b>File Name</b>              | D:\NMR\CJO\CJO-H\CARBON.fid | <b>Frequency (MHz)</b>        | 100.63               | <b>Nucleus</b>               | <sup>13</sup> C      |
| <b>Number of Transients</b>   | 4000                        | <b>Origin</b>                 | spect                | <b>Original Points Count</b> | 32768                |
| <b>Points Count</b>           | 32768                       | <b>Pulse Sequence</b>         | zgpg30               | <b>Receiver Gain</b>         | 196.40               |
| <b>Solvent</b>                | DMSO-d6                     | <b>Spectrum Offset (Hz)</b>   | 10061.7803           | <b>SW(cyclical) (Hz)</b>     | 24038.46             |
| <b>Sweep Width (Hz)</b>       | 24037.73                    | <b>Temperature (degree C)</b> | 23.301               | <b>Spectrum Type</b>         | STANDARD             |

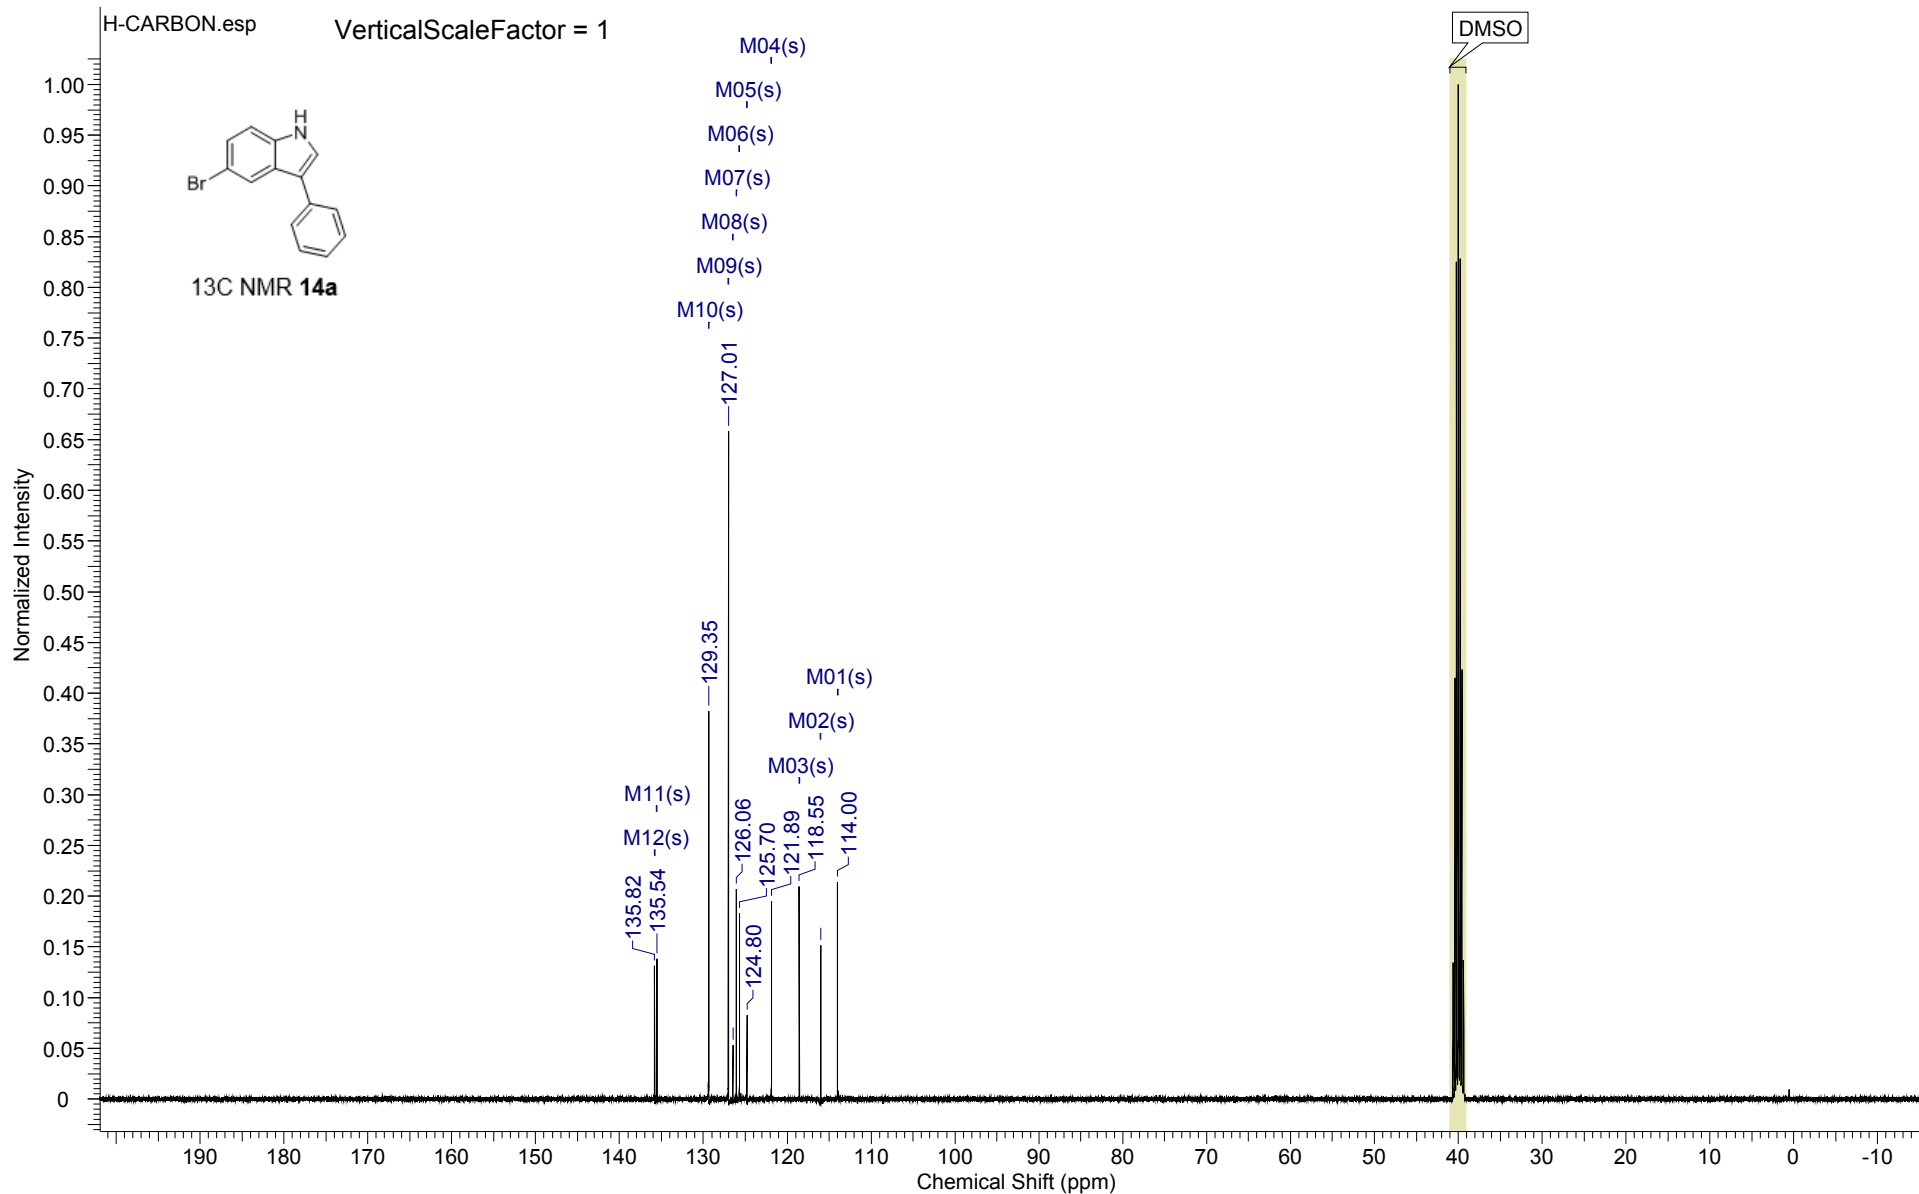

|                               |                                               |                             |                      |                              |                      |
|-------------------------------|-----------------------------------------------|-----------------------------|----------------------|------------------------------|----------------------|
| <b>Acquisition Time (sec)</b> | 4.0894                                        | <b>Date</b>                 | 20 Jul 2017 14:22:08 | <b>Date Stamp</b>            | 20 Jul 2017 14:22:08 |
| <b>File Name</b>              | D:\NMR\New folder\New folder\015-012(G)\1\fid | <b>Frequency (MHz)</b>      | 400.15               | <b>Nucleus</b>               | 1H                   |
| <b>Number of Transients</b>   | 16                                            | <b>Origin</b>               | spect                | <b>Original Points Count</b> | 32768                |
| <b>Points Count</b>           | 32768                                         | <b>Pulse Sequence</b>       | zg30                 | <b>Receiver Gain</b>         | 77.61                |
| <b>Solvent</b>                | DMSO-d6                                       | <b>Spectrum Offset (Hz)</b> | 2470.9255            | <b>Spectrum Type</b>         | STANDARD             |
| <b>Temperature (degree C)</b> | 22.546                                        |                             |                      | <b>SW(cyclical) (Hz)</b>     | 8012.82              |
|                               |                                               |                             |                      | <b>Sweep Width (Hz)</b>      | 8012.58              |

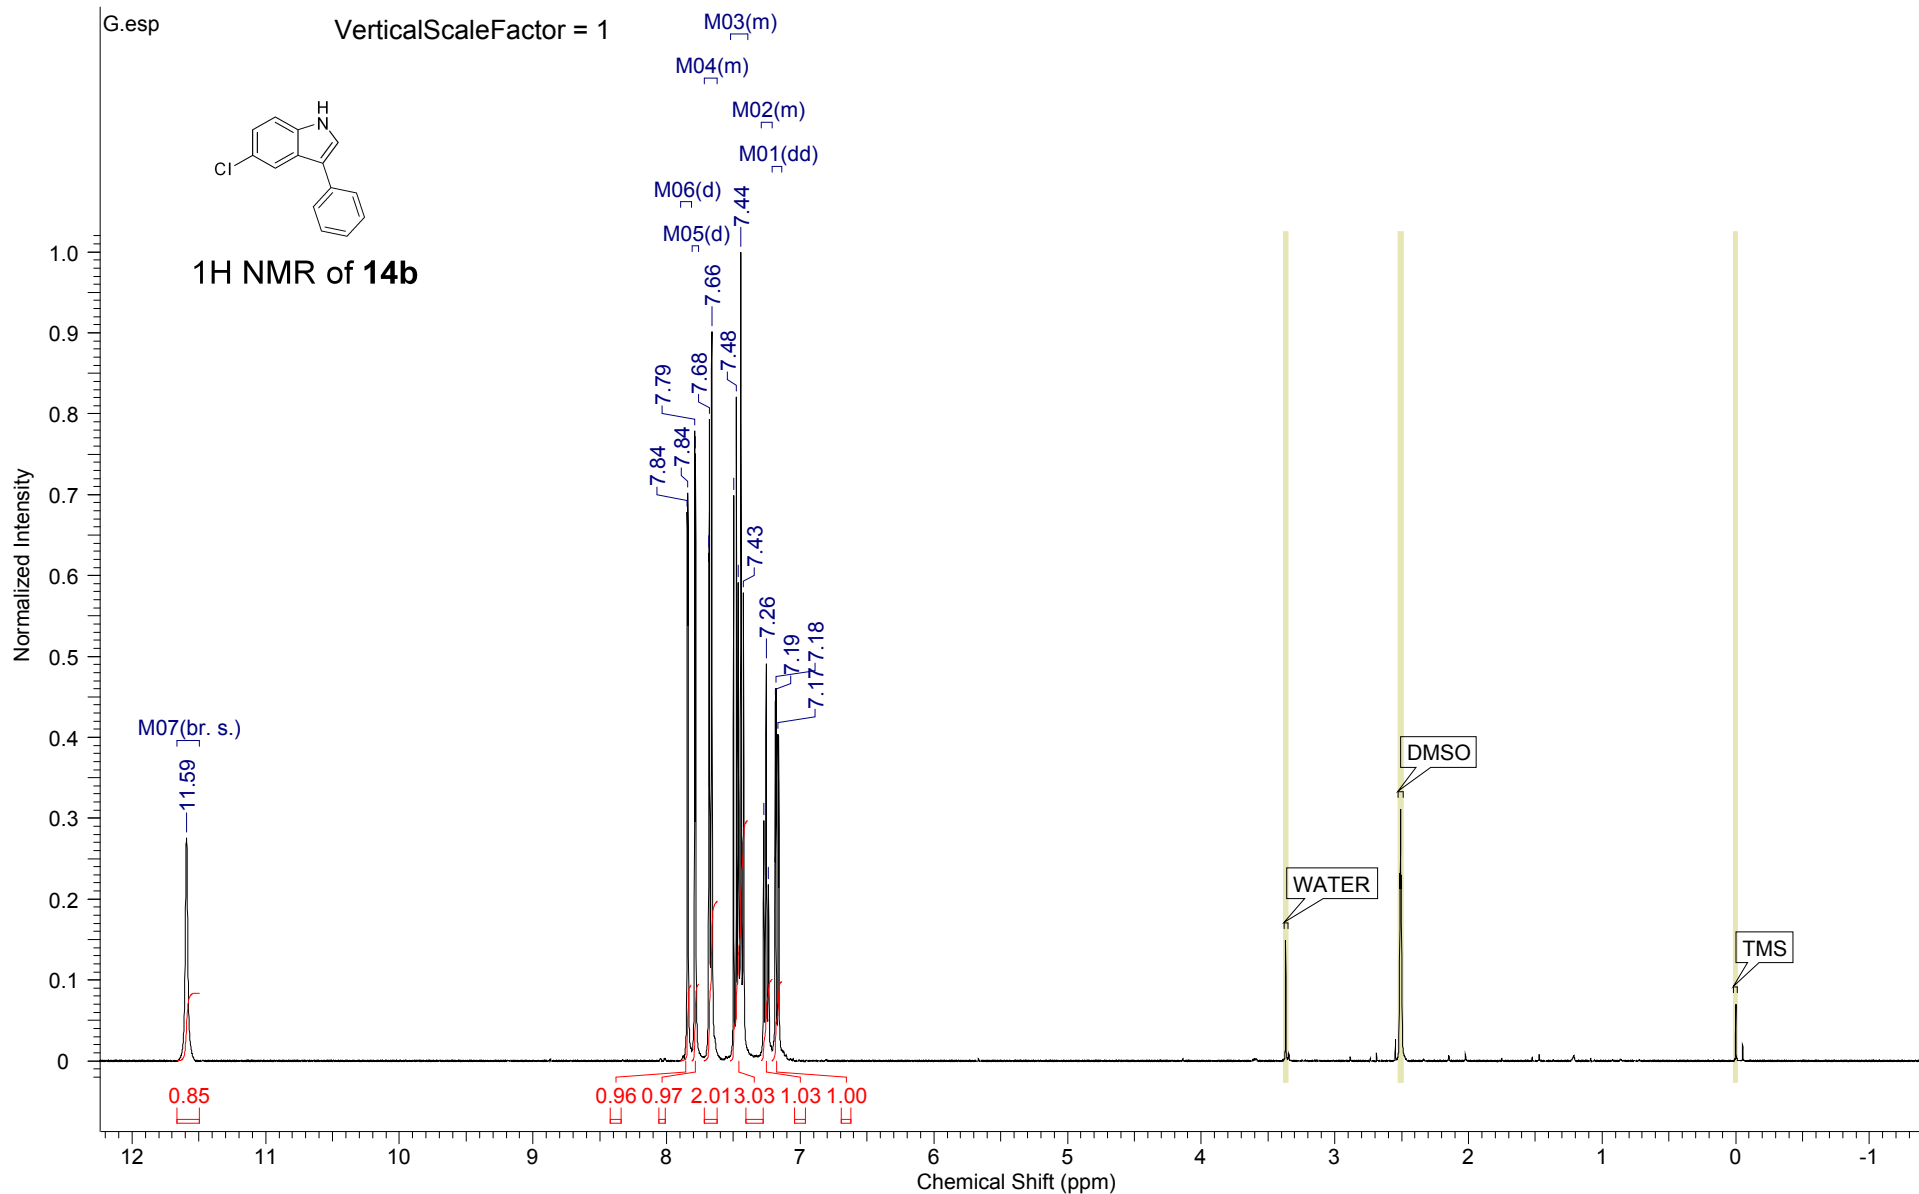

|                        |                        |                        |                      |               |            |                      |            |
|------------------------|------------------------|------------------------|----------------------|---------------|------------|----------------------|------------|
| Acquisition Time (sec) | 1.3631                 | Date                   | 29 Jul 2017 07:38:56 |               | Date Stamp | 29 Jul 2017 07:38:56 |            |
| File Name              | D:\NMR\CJO\CJO-G\1\fid | Frequency (MHz)        | 100.63               | Nucleus       | 13C        | Number of Transients | 4000       |
| Origin                 | spect                  | Original Points Count  | 32768                | Owner         | IND-NMR    | Points Count         | 32768      |
| Receiver Gain          | 196.40                 | SW(cyclical) (Hz)      | 24038.46             | Solvent       | DMSO-d6    | Spectrum Offset (Hz) | 10061.7803 |
| Sweep Width (Hz)       | 24037.73               | Temperature (degree C) | 23.193               | Spectrum Type | STANDARD   |                      |            |

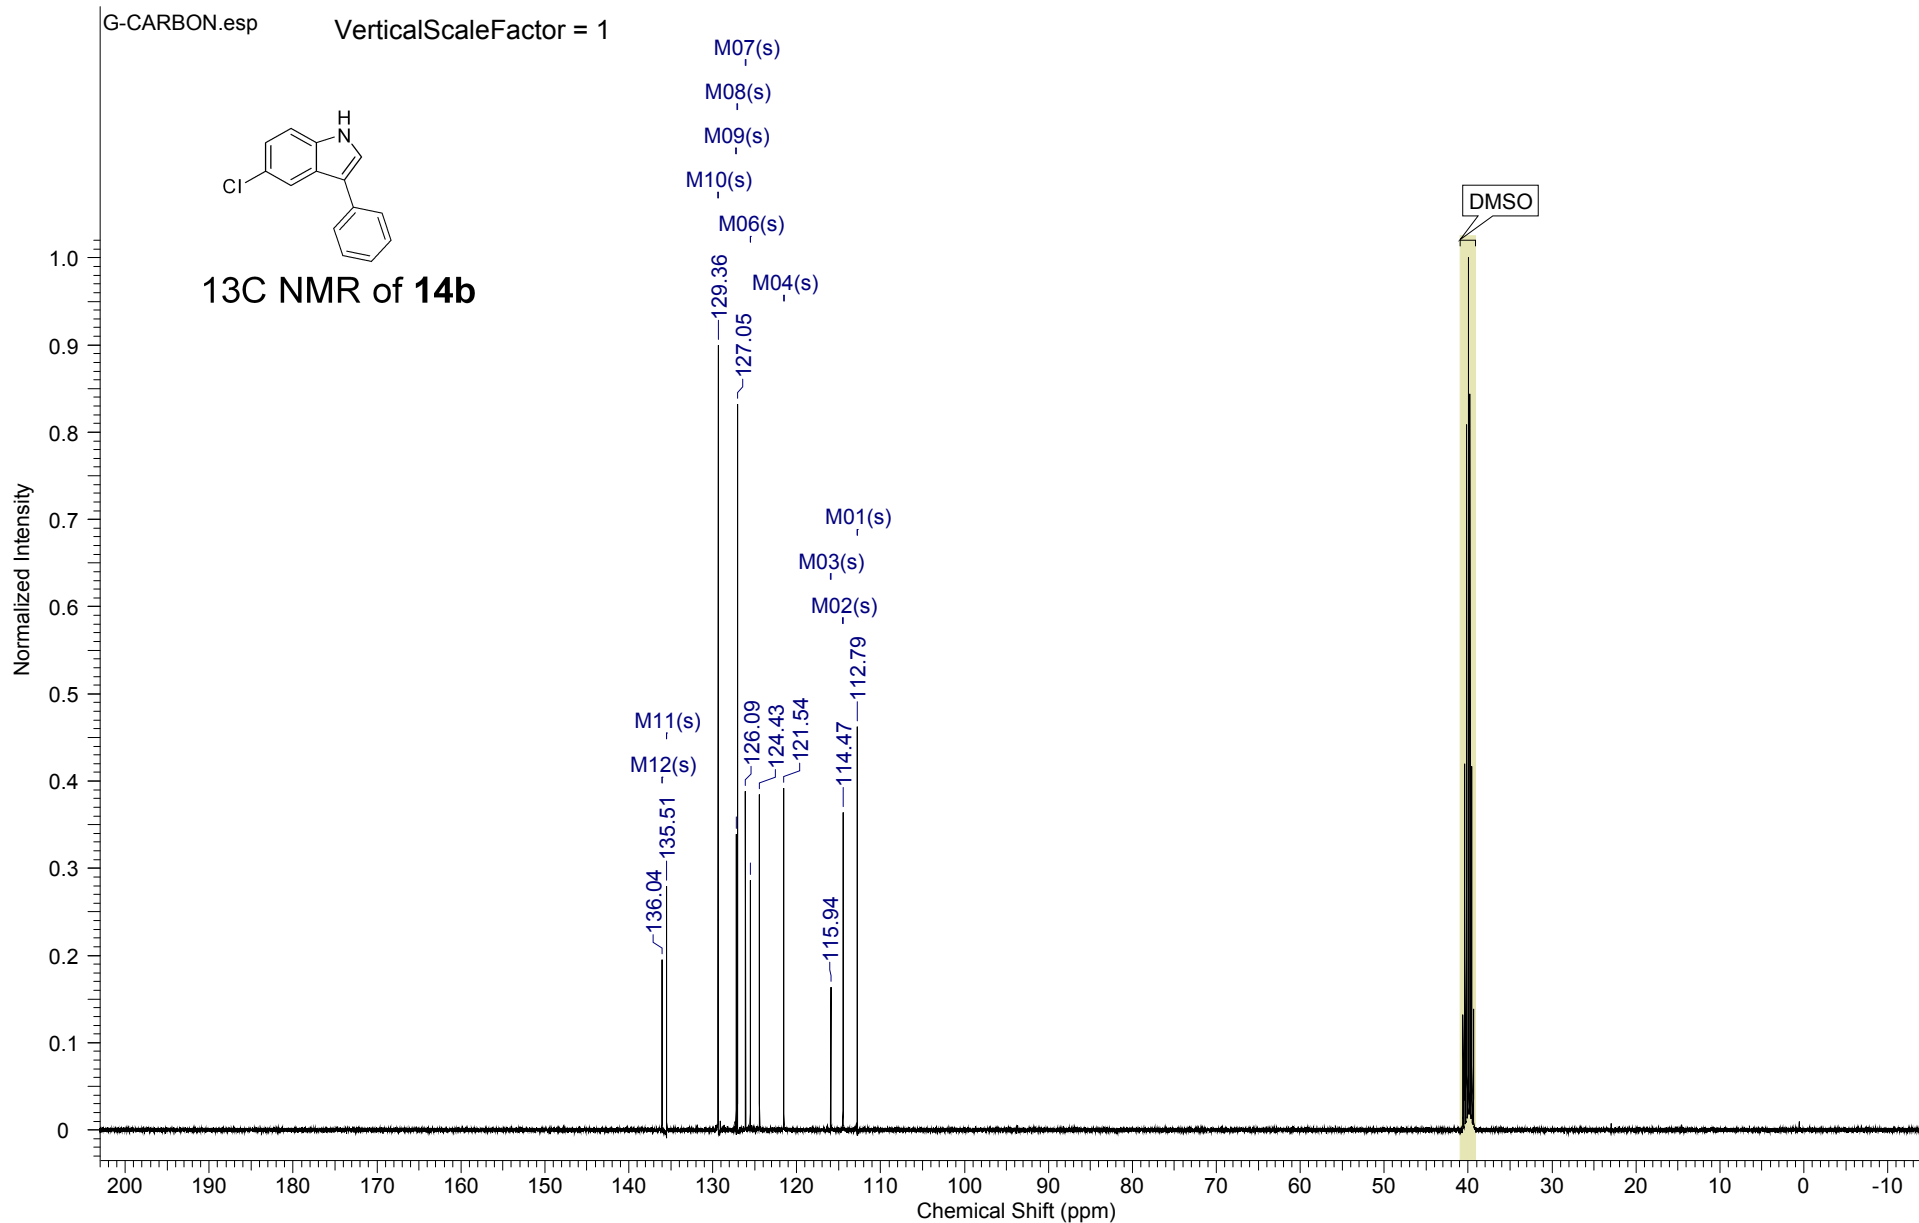

|                        |                       |                        |                      |                      |                      |
|------------------------|-----------------------|------------------------|----------------------|----------------------|----------------------|
| Acquisition Time (sec) | 4.0894                | Date                   | 21 Jul 2017 08:53:36 | Date Stamp           | 21 Jul 2017 08:53:36 |
| File Name              | D:\NMR\CJO\CJO-F1\fid | Frequency (MHz)        | 400.15               | Nucleus              | 1H                   |
| Origin                 | spect                 | Original Points Count  | 32768                | Owner                | IND-NMR              |
| Receiver Gain          | 141.25                | SW(cyclical) (Hz)      | 8012.82              | Points Count         | 32768                |
| Sweep Width (Hz)       | 8012.58               | Solvent                | DMSO-d6              | Spectrum Offset (Hz) | 2470.9260            |
|                        |                       | Temperature (degree C) | 22.659               | Spectrum Type        | STANDARD             |

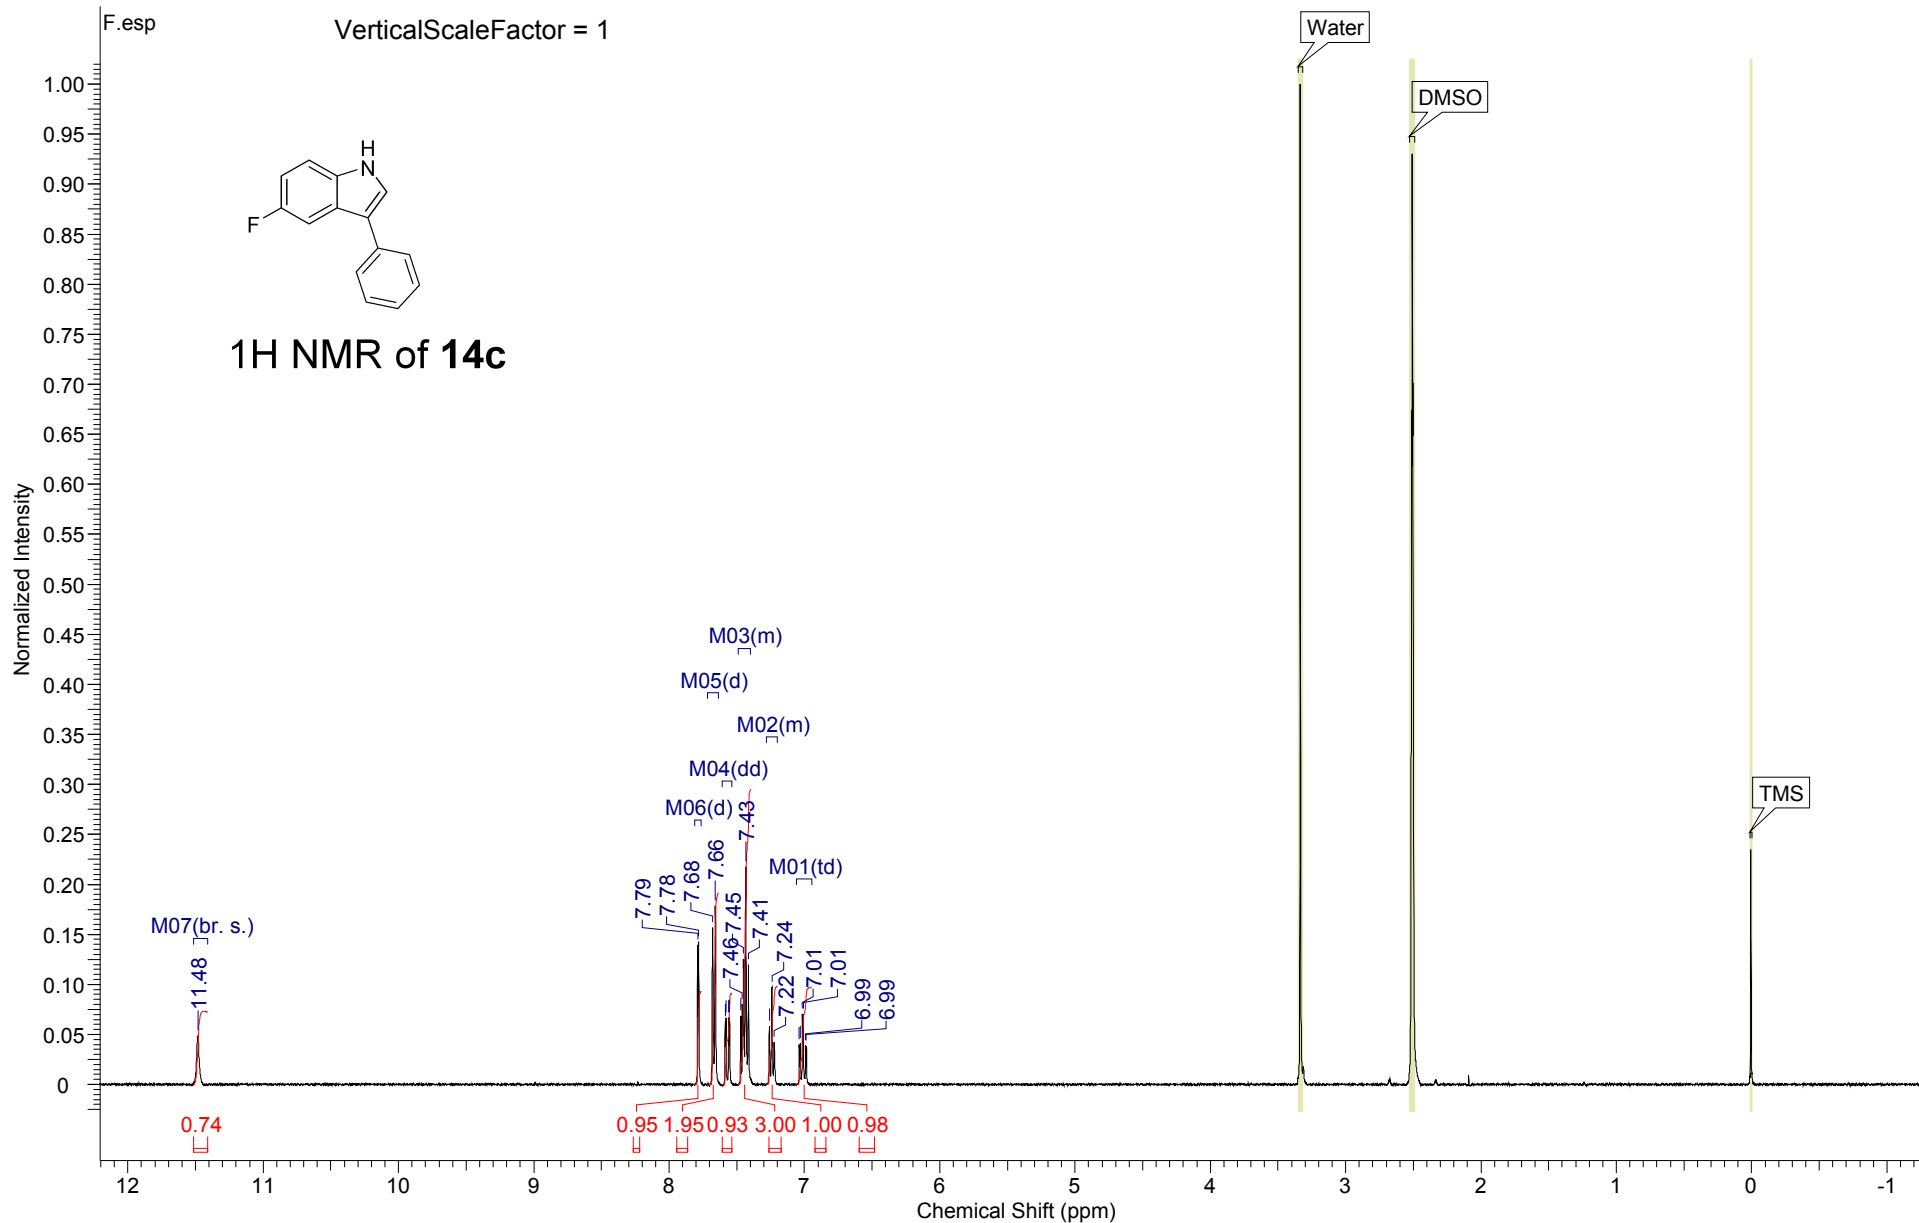

|                               |                             |                               |                      |                              |                      |
|-------------------------------|-----------------------------|-------------------------------|----------------------|------------------------------|----------------------|
| <b>Acquisition Time (sec)</b> | 1.3631                      | <b>Date</b>                   | 28 Jul 2017 01:51:12 | <b>Date Stamp</b>            | 28 Jul 2017 01:51:12 |
| <b>File Name</b>              | D:\NMR\CJO\CJO-F\CARBON\fid | <b>Frequency (MHz)</b>        | 100.63               | <b>Nucleus</b>               | <sup>13</sup> C      |
| <b>Number of Transients</b>   | 4000                        | <b>Origin</b>                 | spect                | <b>Original Points Count</b> | 32768                |
| <b>Points Count</b>           | 32768                       | <b>Pulse Sequence</b>         | zgpg30               | <b>Receiver Gain</b>         | 196.40               |
| <b>Solvent</b>                | DMSO-d6                     | <b>Spectrum Offset (Hz)</b>   | 10061.7803           | <b>SW(cyclical) (Hz)</b>     | 24038.46             |
| <b>Sweep Width (Hz)</b>       | 24037.73                    | <b>Temperature (degree C)</b> | 22.973               | <b>Spectrum Type</b>         | STANDARD             |

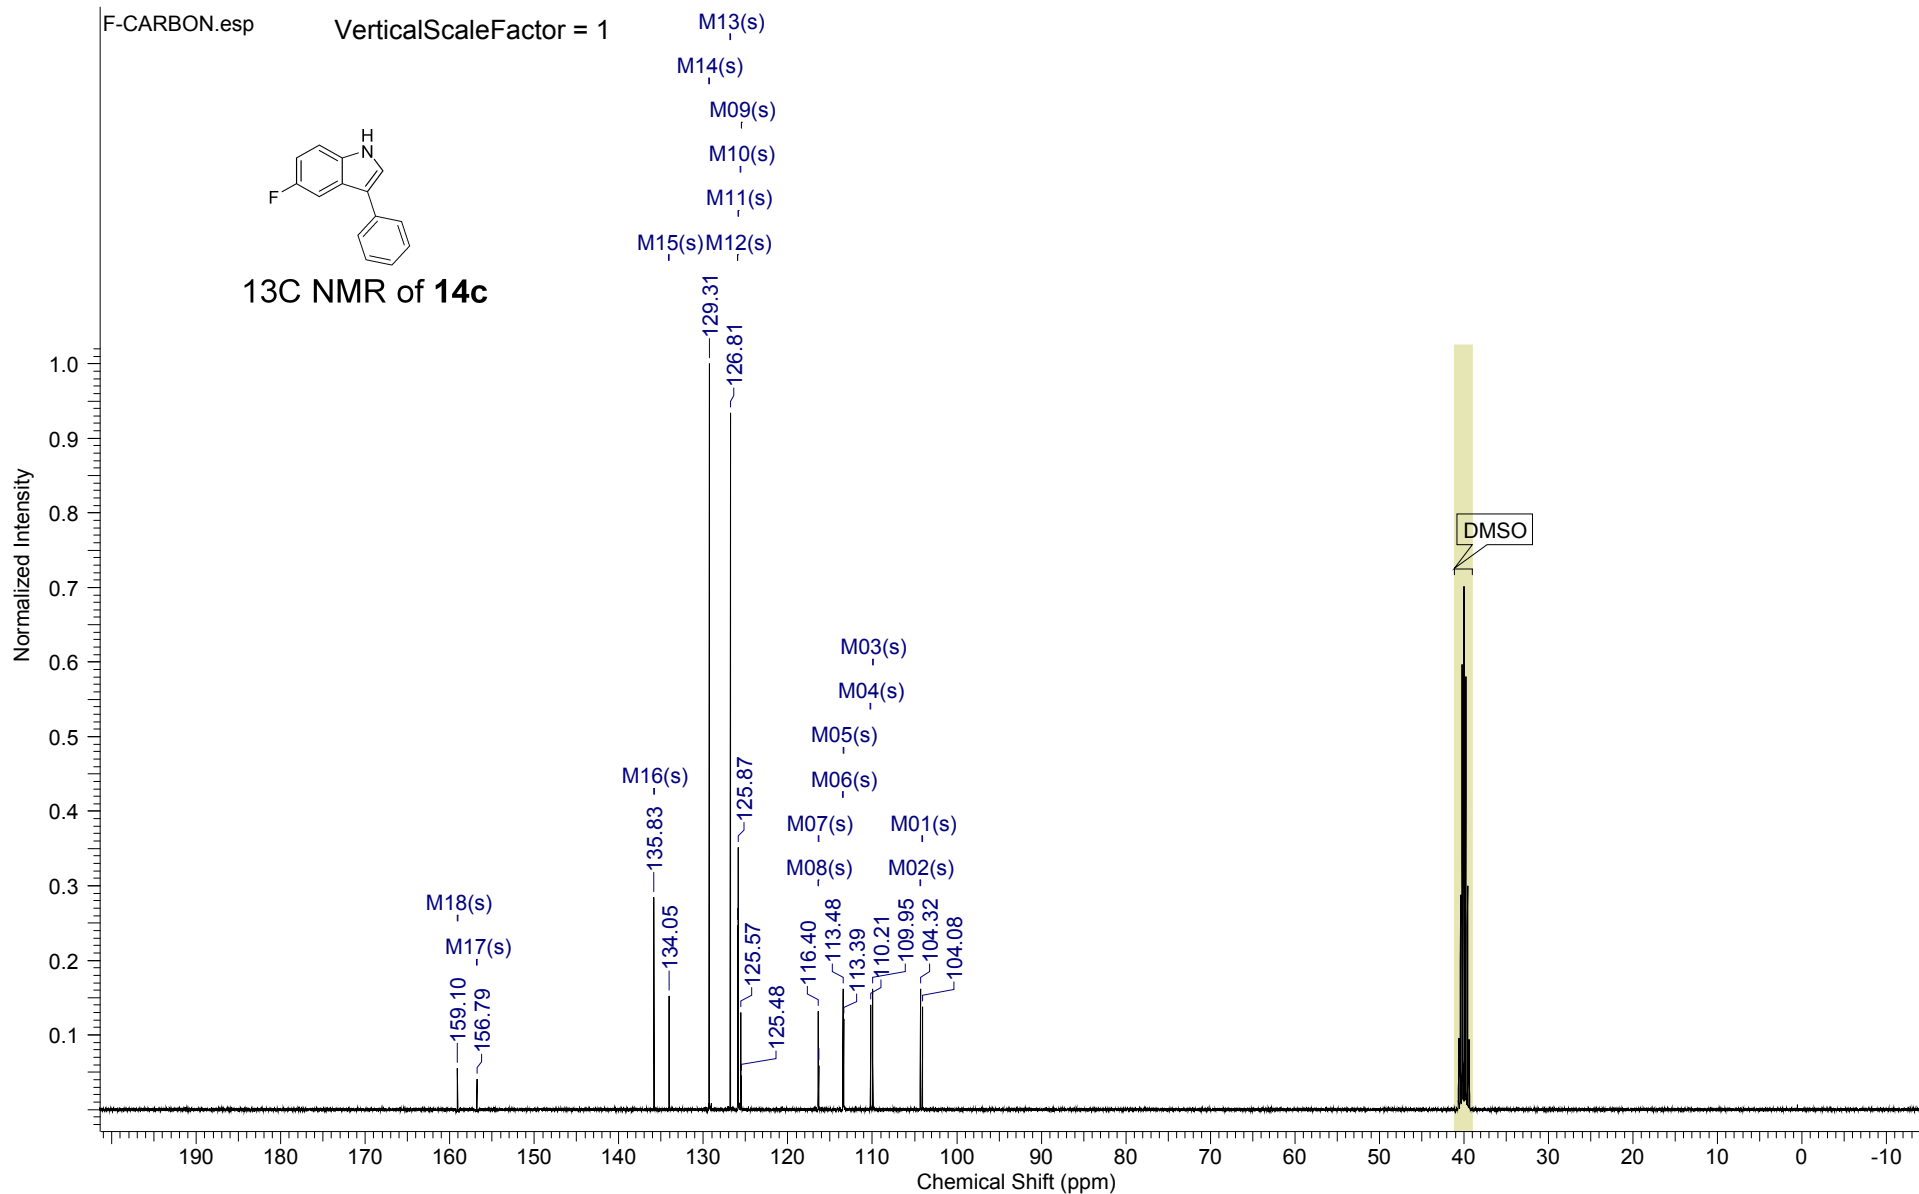

|                        |                       |                        |                      |                      |                      |
|------------------------|-----------------------|------------------------|----------------------|----------------------|----------------------|
| Acquisition Time (sec) | 4.0894                | Date                   | 03 Aug 2017 09:21:20 | Date Stamp           | 03 Aug 2017 09:21:20 |
| File Name              | D:\NMR\CJO\CJO-J3\fid | Frequency (MHz)        | 400.15               | Nucleus              | 1H                   |
| Origin                 | spect                 | Original Points Count  | 32768                | Owner                | IND-NMR              |
| Receiver Gain          | 125.72                | SW(cyclical) (Hz)      | 8012.82              | Points Count         | 32768                |
| Sweep Width (Hz)       | 8012.58               | Solvent                | DMSO-d6              | Spectrum Offset (Hz) | 2470.9260            |
|                        |                       | Temperature (degree C) | 22.630               | Number of Transients | 32                   |
|                        |                       |                        |                      | Pulse Sequence       | zg30                 |
|                        |                       |                        |                      | Spectrum Type        | STANDARD             |

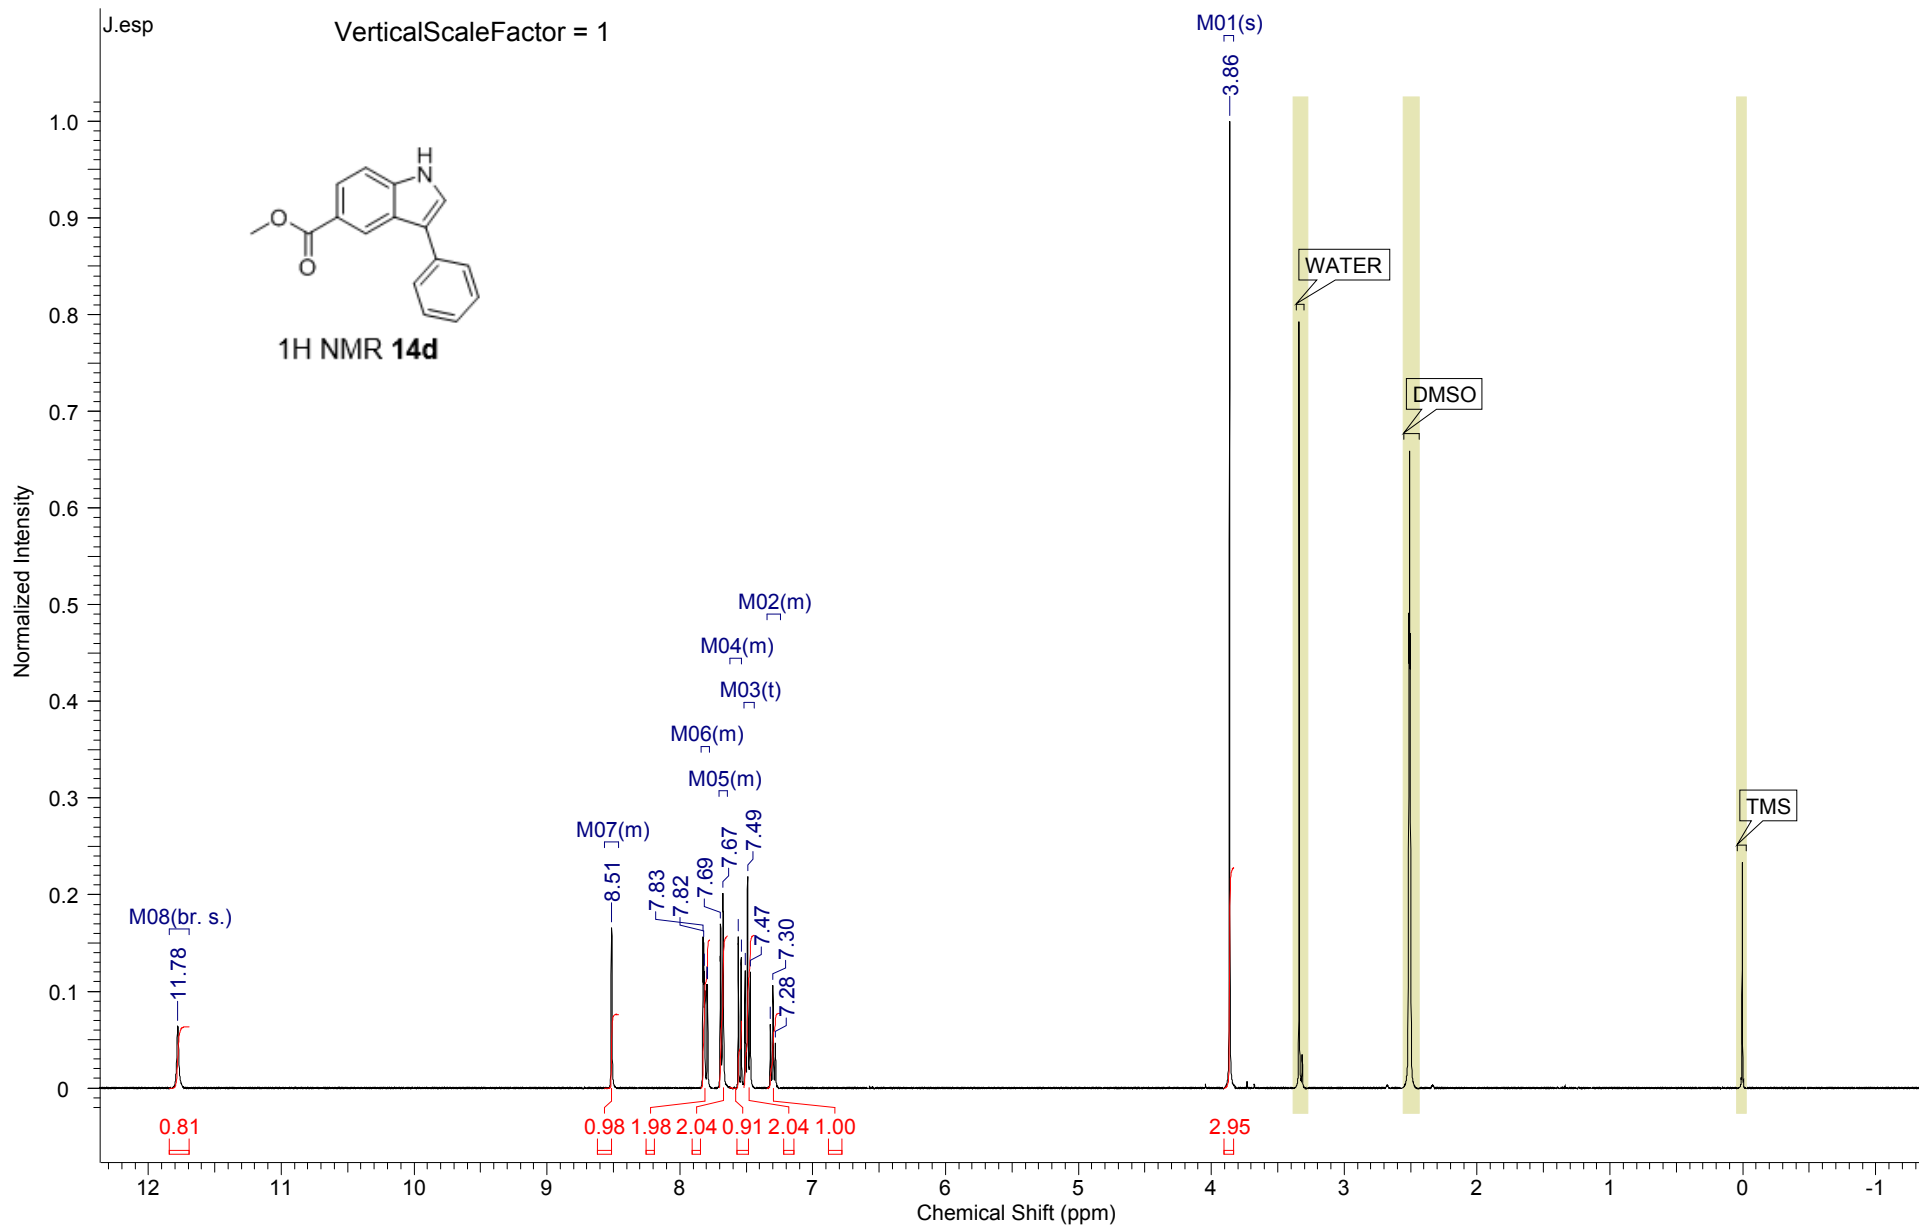

|                        |                             |                      |                      |                       |            |                      |          |
|------------------------|-----------------------------|----------------------|----------------------|-----------------------|------------|----------------------|----------|
| Acquisition Time (sec) | 1.3631                      | Date                 | 01 Aug 2017 05:43:44 |                       | Date Stamp | 01 Aug 2017 05:43:44 |          |
| File Name              | D:\NMR\CJO\CJO-J-CARBON\fid |                      | Frequency (MHz)      | 100.63                | Nucleus    | 13C                  |          |
| Number of Transients   | 4000                        | Origin               | spect                | Original Points Count | 32768      | Owner                | IND-NMR  |
| Points Count           | 32768                       | Pulse Sequence       | zgpg30               | Receiver Gain         | 196.40     | SW(cyclical) (Hz)    | 24038.46 |
| Solvent                | DMSO-d6                     | Spectrum Offset (Hz) | 10061.7803           | Spectrum Type         | STANDARD   | Sweep Width (Hz)     | 24037.73 |
| Temperature (degree C) | 23.340                      |                      |                      |                       |            |                      |          |

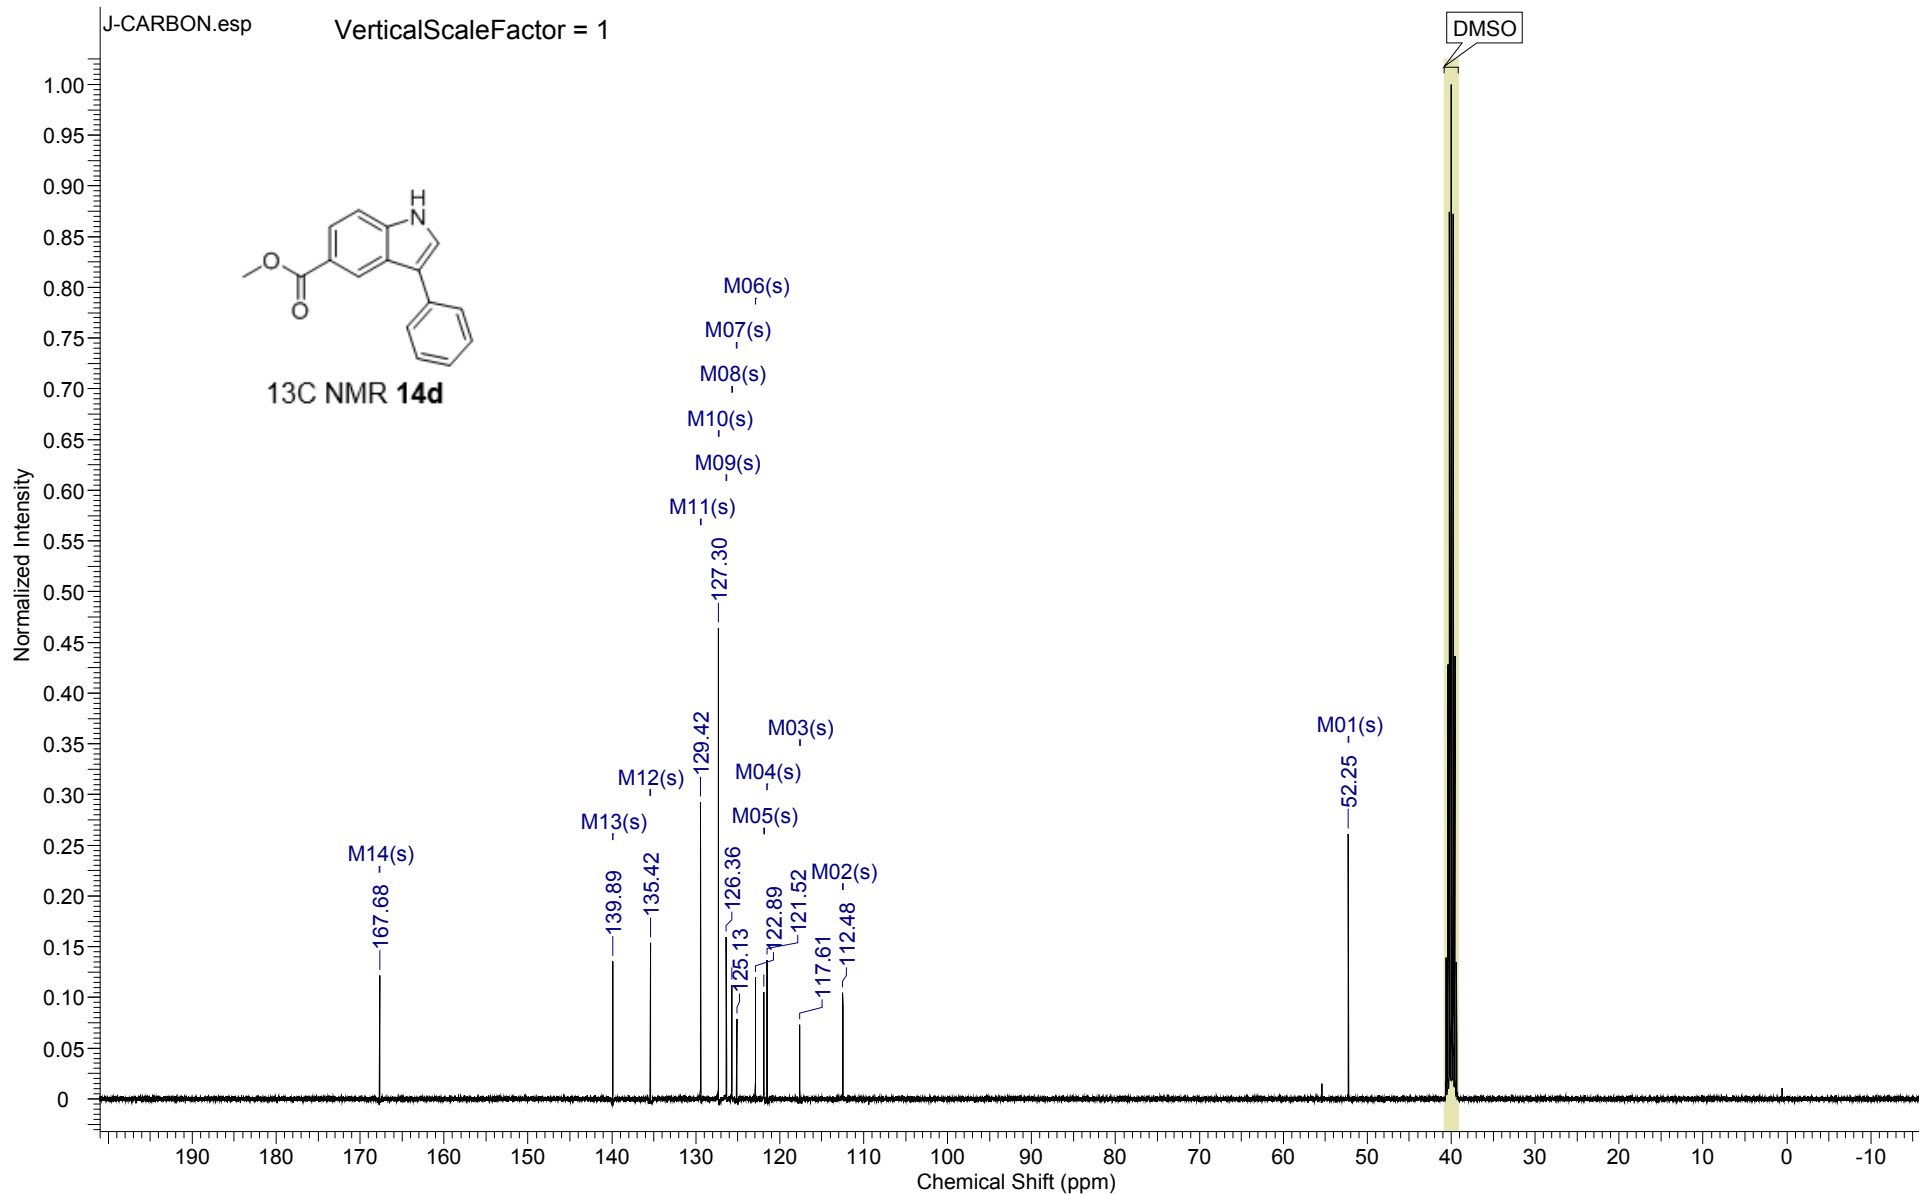

|                        |                        |                        |                      |                      |                      |
|------------------------|------------------------|------------------------|----------------------|----------------------|----------------------|
| Acquisition Time (sec) | 4.0894                 | Date                   | 28 Jul 2017 11:25:04 | Date Stamp           | 28 Jul 2017 11:25:04 |
| File Name              | D:\NMR\CJO\CJO-K12\fid | Frequency (MHz)        | 400.15               | Nucleus              | 1H                   |
| Origin                 | spect                  | Original Points Count  | 32768                | Owner                | IND-NMR              |
| Receiver Gain          | 125.72                 | SW(cyclical) (Hz)      | 8012.82              | Points Count         | 32768                |
| Sweep Width (Hz)       | 8012.58                | Solvent                | DMSO-d6              | Spectrum Offset (Hz) | 2470.9260            |
|                        |                        | Temperature (degree C) | 22.432               | Pulse Sequence       | zg30                 |
|                        |                        |                        |                      | Spectrum Type        | STANDARD             |

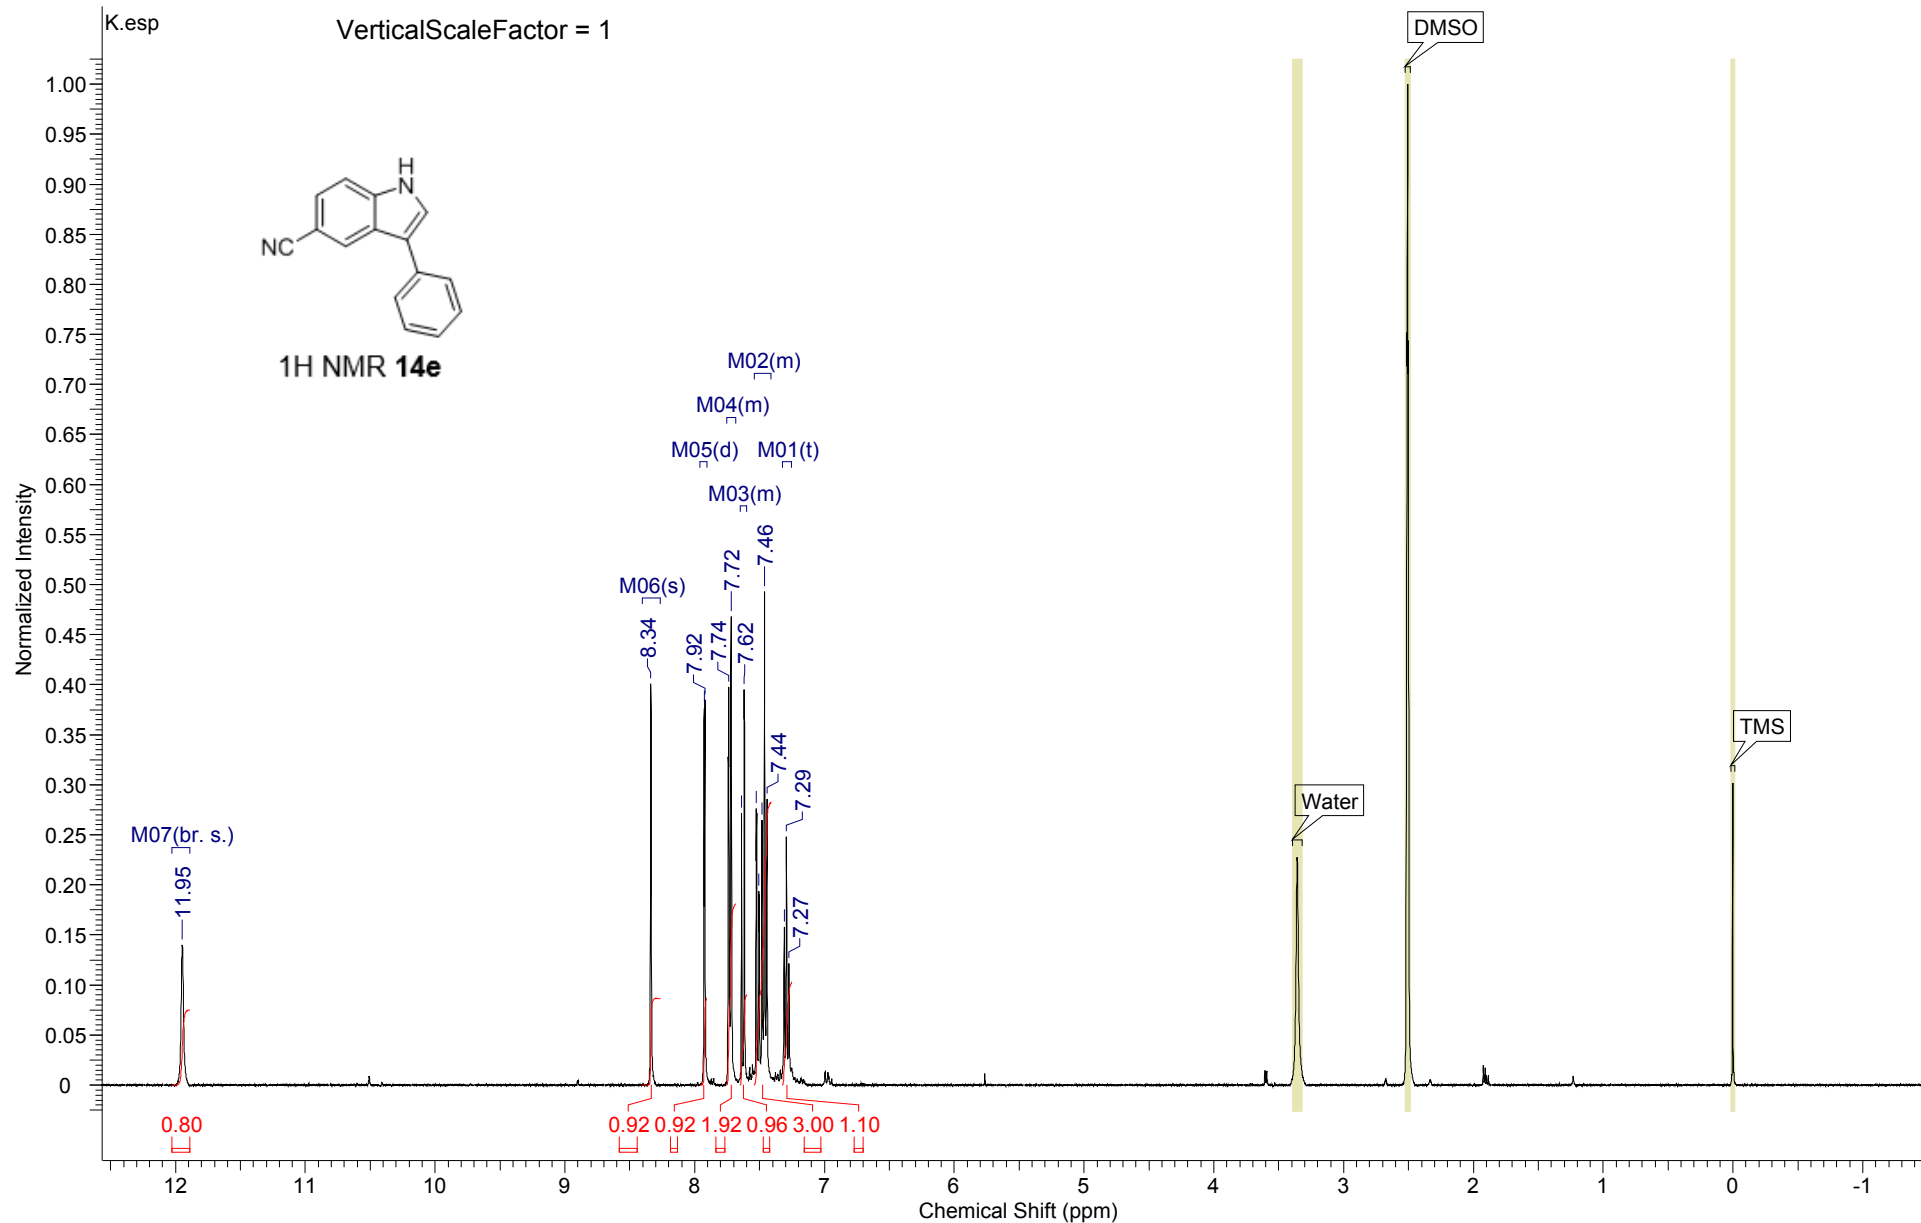



|                        |                             |                        |                      |                       |                      |
|------------------------|-----------------------------|------------------------|----------------------|-----------------------|----------------------|
| Acquisition Time (sec) | 1.3631                      | Date                   | 29 Jul 2017 20:44:00 | Date Stamp            | 29 Jul 2017 20:44:00 |
| File Name              | D:\NMR\CJO\CJO-K\CARBON.fid | Frequency (MHz)        | 100.63               | Nucleus               | 13C                  |
| Number of Transients   | 4000                        | Origin                 | spect                | Original Points Count | 32768                |
| Points Count           | 32768                       | Pulse Sequence         | zgpg30               | Receiver Gain         | 196.40               |
| Solvent                | DMSO-d6                     | Spectrum Offset (Hz)   | 10061.7803           | SW(cyclical) (Hz)     | 24038.46             |
| Sweep Width (Hz)       | 24037.73                    | Temperature (degree C) | 23.339               | Spectrum Type         | STANDARD             |

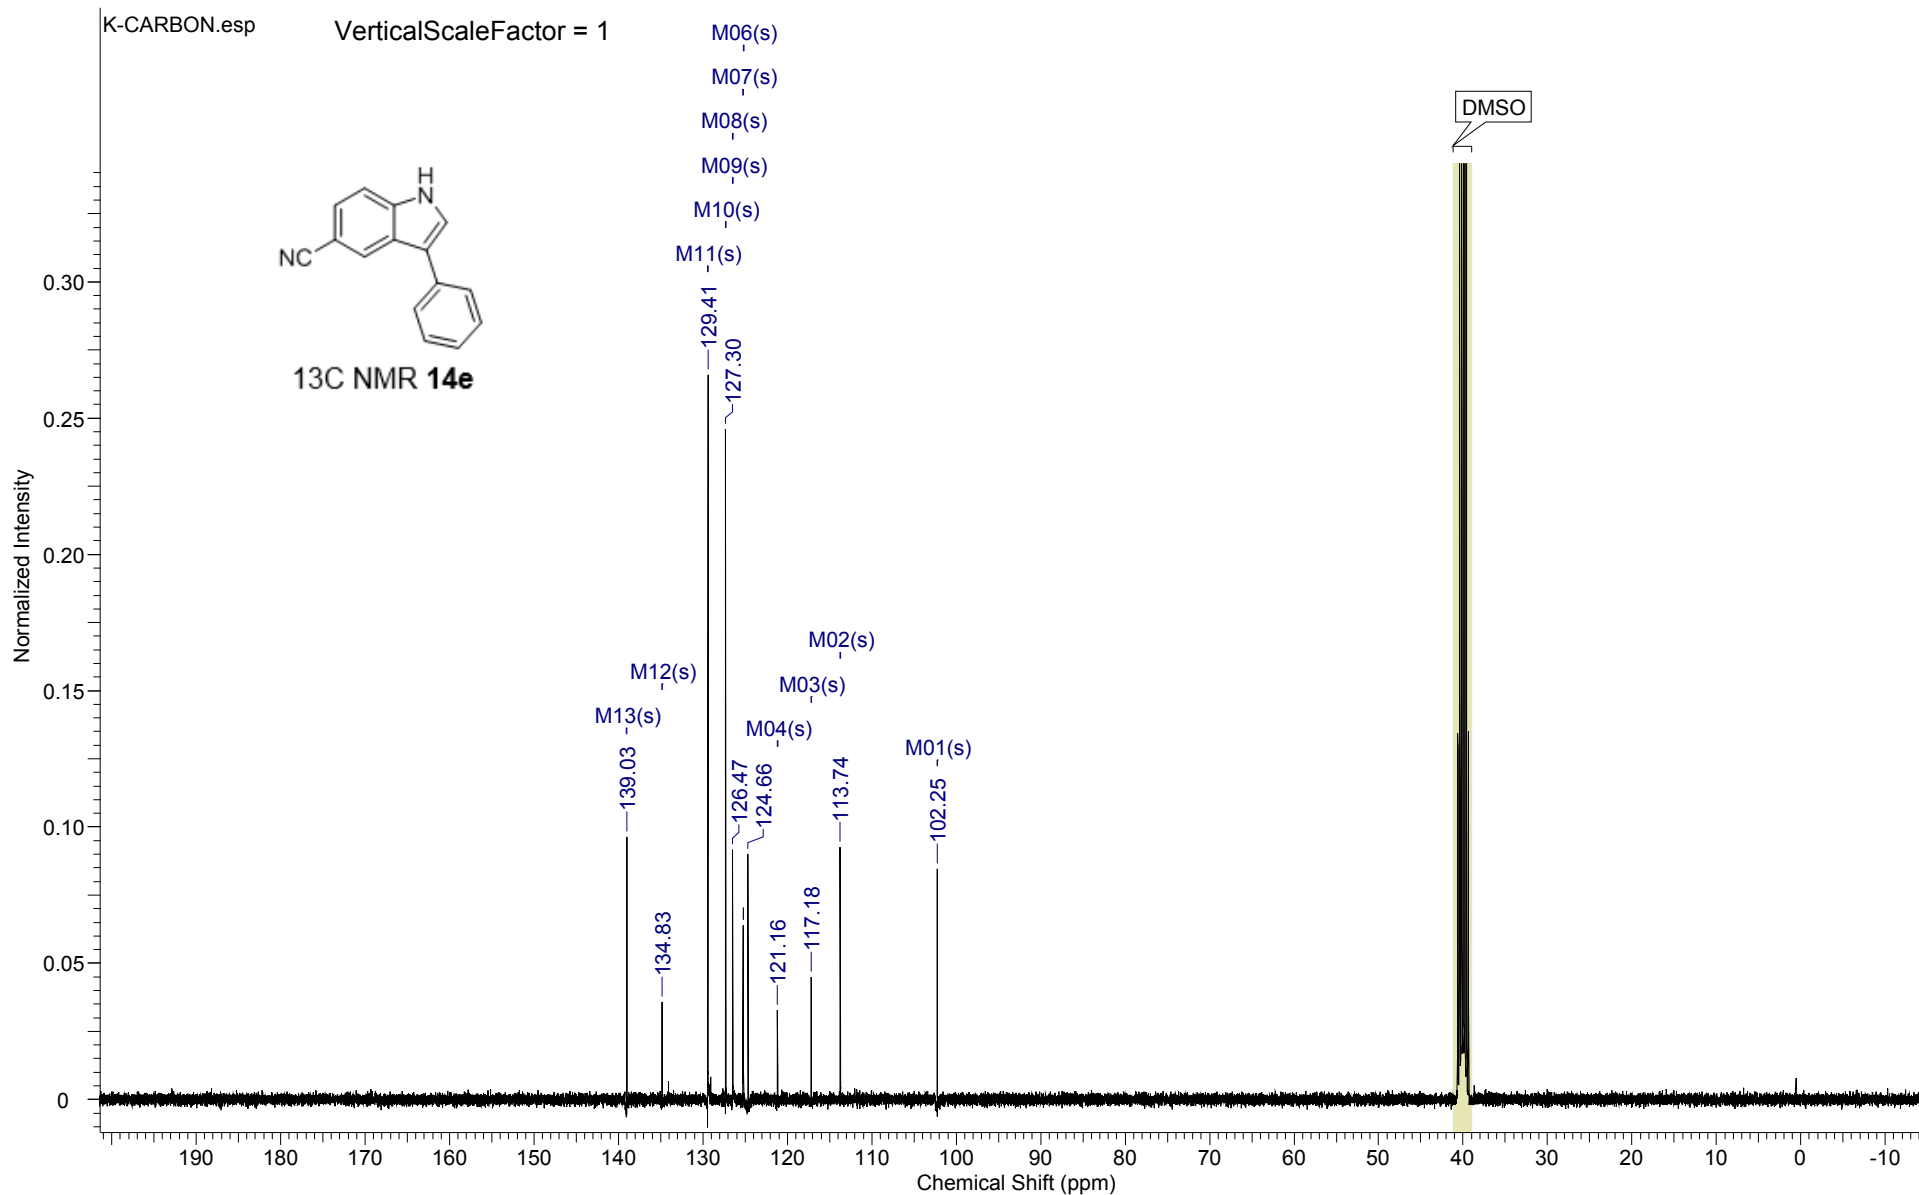

|                        |                       |                        |                      |                      |                      |
|------------------------|-----------------------|------------------------|----------------------|----------------------|----------------------|
| Acquisition Time (sec) | 4.0894                | Date                   | 03 Aug 2017 08:49:20 | Date Stamp           | 03 Aug 2017 08:49:20 |
| File Name              | D:\NMR\CJO\CJO-L1\fid | Frequency (MHz)        | 400.15               | Nucleus              | 1H                   |
| Origin                 | spect                 | Original Points Count  | 32768                | Owner                | IND-NMR              |
| Receiver Gain          | 110.38                | SW(cyclical) (Hz)      | 8012.82              | Points Count         | 32768                |
| Sweep Width (Hz)       | 8012.58               | Temperature (degree C) | 22.559               | Solvent              | DMSO-d6              |
|                        |                       |                        |                      | Spectrum Offset (Hz) | 2470.9260            |
|                        |                       |                        |                      | Spectrum Type        | STANDARD             |

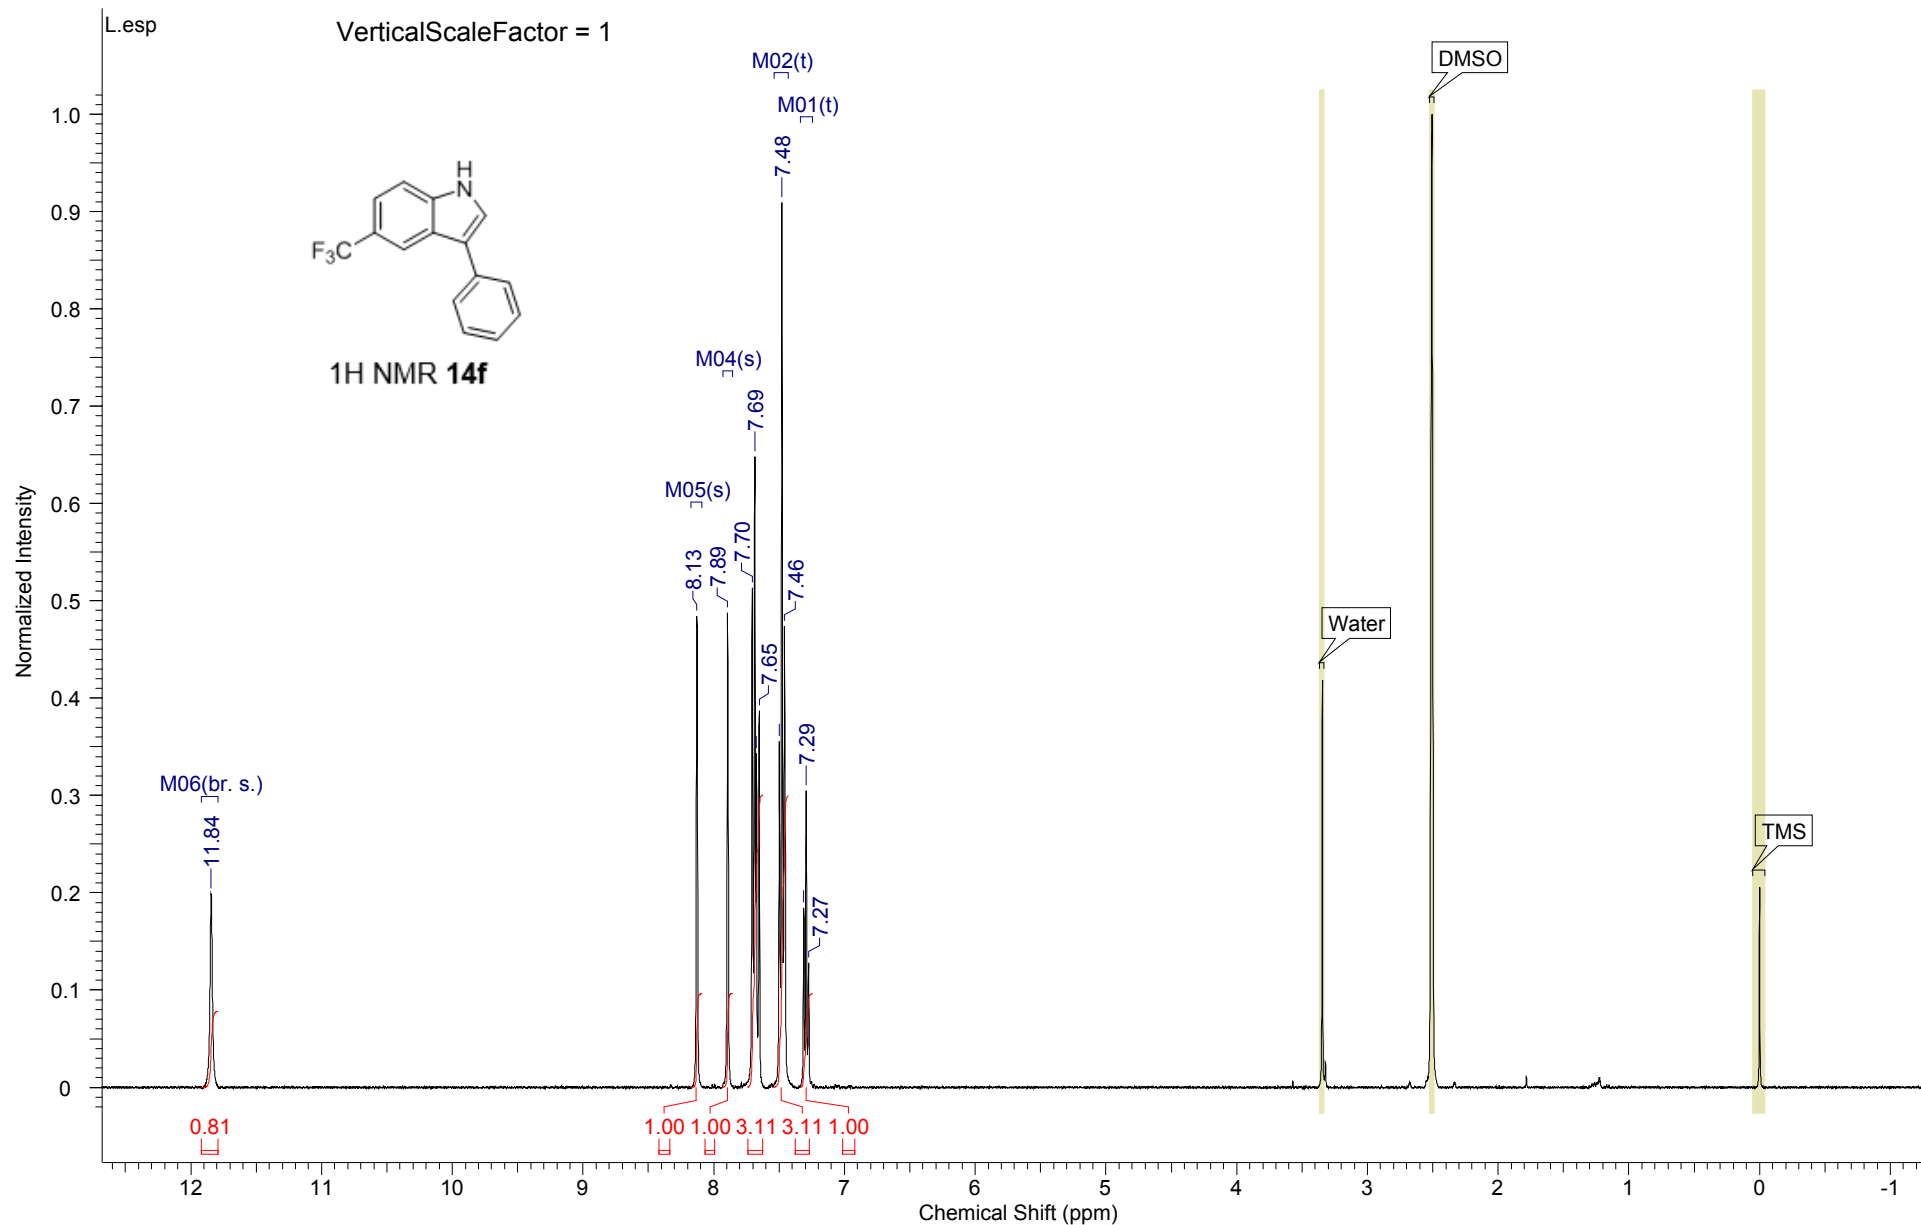

|                               |                             |                             |                      |                              |                      |
|-------------------------------|-----------------------------|-----------------------------|----------------------|------------------------------|----------------------|
| <b>Acquisition Time (sec)</b> | 1.3631                      | <b>Date</b>                 | 04 Aug 2017 06:41:20 | <b>Date Stamp</b>            | 04 Aug 2017 06:41:20 |
| <b>File Name</b>              | D:\NMR\CJO\CJO-L\CARBON\fid | <b>Frequency (MHz)</b>      | 100.63               | <b>Nucleus</b>               | <sup>13</sup> C      |
| <b>Number of Transients</b>   | 3000                        | <b>Origin</b>               | spect                | <b>Original Points Count</b> | 32768                |
| <b>Points Count</b>           | 32768                       | <b>Pulse Sequence</b>       | zgpg30               | <b>Receiver Gain</b>         | 196.40               |
| <b>Solvent</b>                | DMSO-d6                     | <b>Spectrum Offset (Hz)</b> | 10061.7803           | <b>Spectrum Type</b>         | STANDARD             |
| <b>Temperature (degree C)</b> | 23.617                      |                             |                      | <b>SW(cyclical) (Hz)</b>     | 24038.46             |
|                               |                             |                             |                      | <b>Sweep Width (Hz)</b>      | 24037.73             |

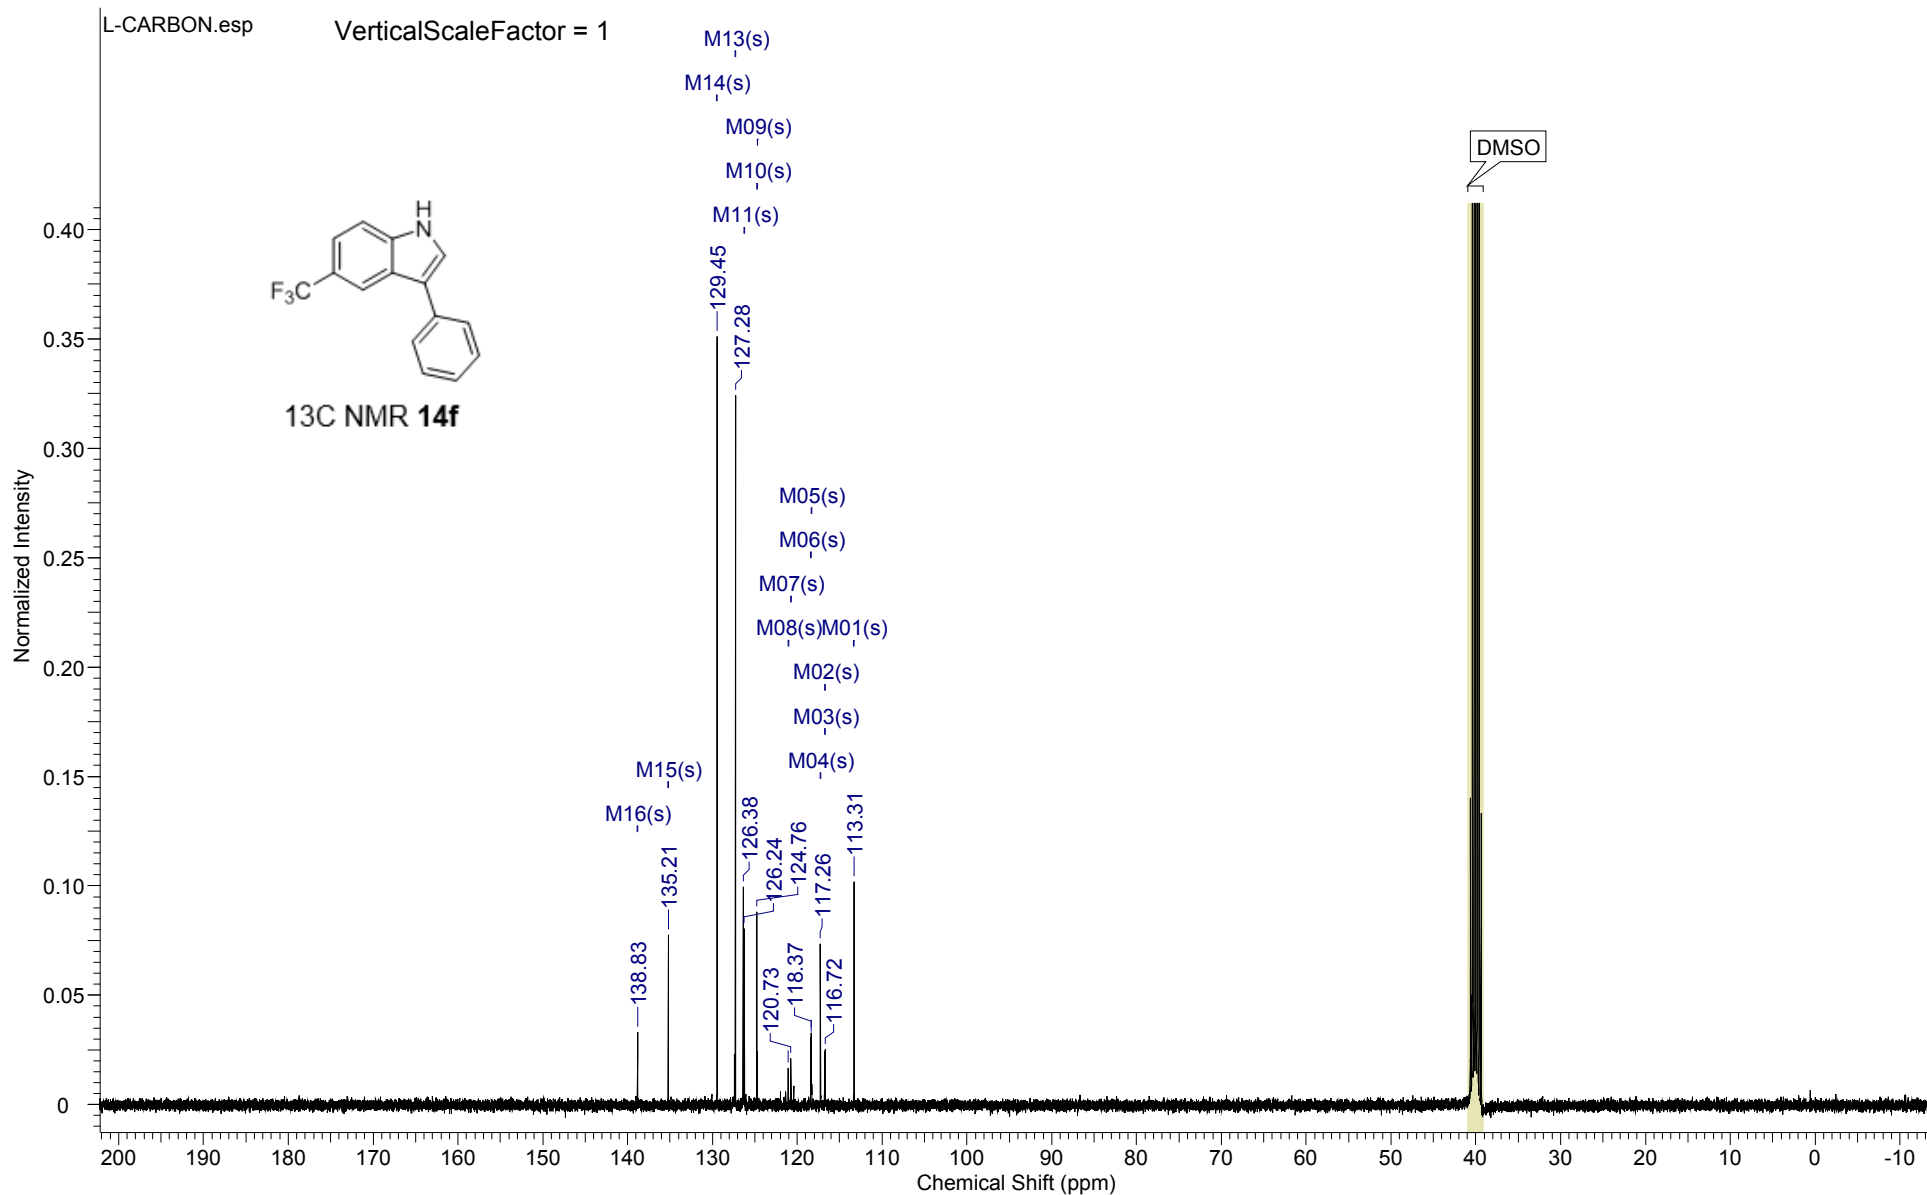

|                        |                       |                        |                      |                      |                      |
|------------------------|-----------------------|------------------------|----------------------|----------------------|----------------------|
| Acquisition Time (sec) | 4.0894                | Date                   | 21 Jul 2017 08:15:12 | Date Stamp           | 21 Jul 2017 08:15:12 |
| File Name              | D:\NMR\CJO\CJO-E1\fid | Frequency (MHz)        | 400.15               | Nucleus              | 1H                   |
| Origin                 | spect                 | Original Points Count  | 32768                | Owner                | IND-NMR              |
| Receiver Gain          | 141.25                | SW(cyclical) (Hz)      | 8012.82              | Points Count         | 32768                |
| Sweep Width (Hz)       | 8012.58               | Solvent                | DMSO-d6              | Spectrum Offset (Hz) | 2470.9260            |
|                        |                       | Temperature (degree C) | 22.747               | Number of Transients | 32                   |
|                        |                       |                        |                      | Pulse Sequence       | zg30                 |
|                        |                       |                        |                      | Spectrum Type        | STANDARD             |

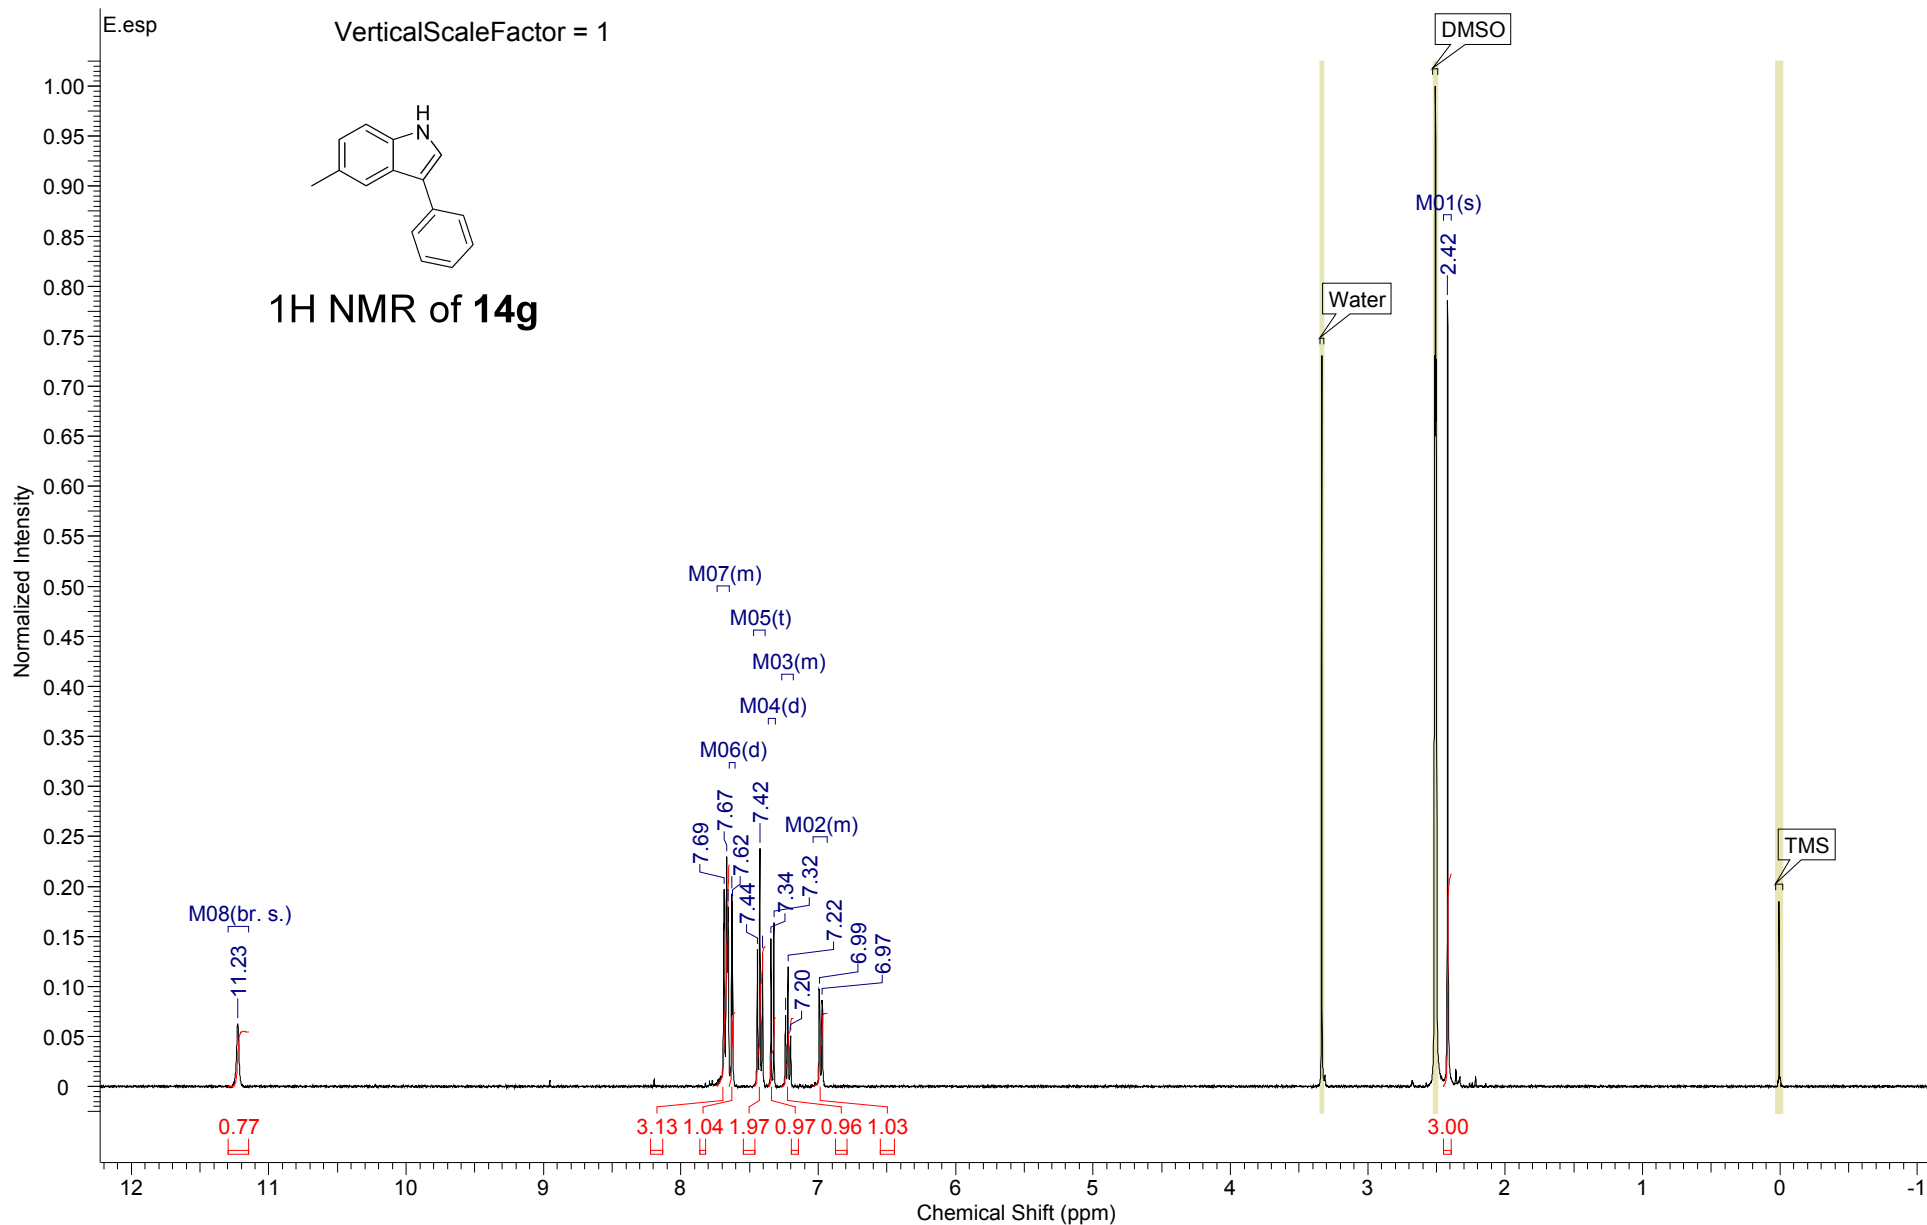

|                               |                             |                               |                      |                              |                      |
|-------------------------------|-----------------------------|-------------------------------|----------------------|------------------------------|----------------------|
| <b>Acquisition Time (sec)</b> | 1.3631                      | <b>Date</b>                   | 27 Jul 2017 05:41:36 | <b>Date Stamp</b>            | 27 Jul 2017 05:41:36 |
| <b>File Name</b>              | D:\NMR\CJO\CJO-E\CARBON.fid | <b>Frequency (MHz)</b>        | 100.63               | <b>Nucleus</b>               | 13C                  |
| <b>Number of Transients</b>   | 4000                        | <b>Origin</b>                 | spect                | <b>Original Points Count</b> | 32768                |
| <b>Points Count</b>           | 32768                       | <b>Pulse Sequence</b>         | zgpg30               | <b>Receiver Gain</b>         | 196.40               |
| <b>Solvent</b>                | DMSO-d6                     | <b>Spectrum Offset (Hz)</b>   | 10061.7803           | <b>SW(cyclical) (Hz)</b>     | 24038.46             |
| <b>Sweep Width (Hz)</b>       | 24037.73                    | <b>Temperature (degree C)</b> | 23.122               | <b>Spectrum Type</b>         | STANDARD             |

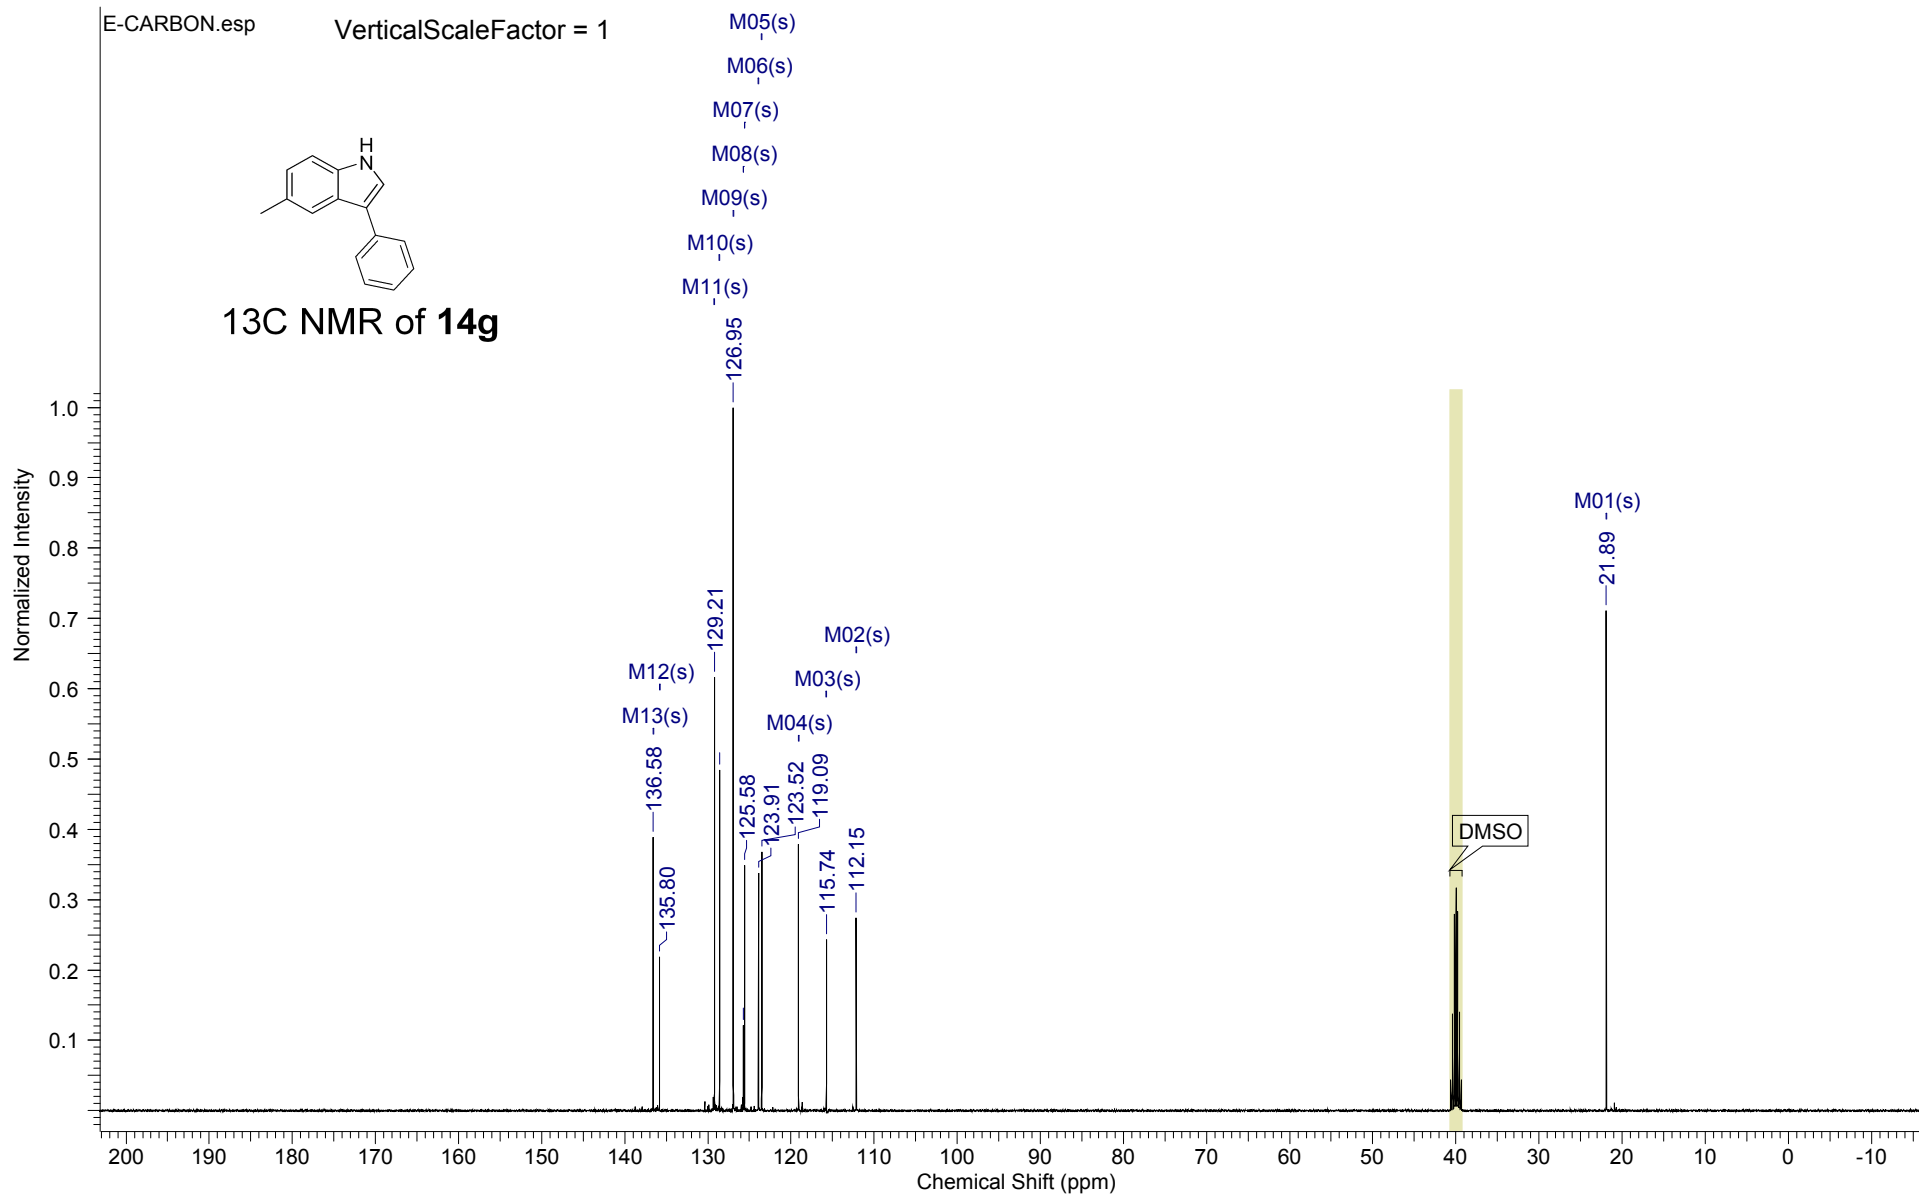

|                               |                                              |                             |                      |                              |                      |
|-------------------------------|----------------------------------------------|-----------------------------|----------------------|------------------------------|----------------------|
| <b>Acquisition Time (sec)</b> | 4.0894                                       | <b>Date</b>                 | 20 Jul 2017 14:17:52 | <b>Date Stamp</b>            | 20 Jul 2017 14:17:52 |
| <b>File Name</b>              | D:\NMR\New folder\New folder\015-011(l)\1fid | <b>Frequency (MHz)</b>      | 400.15               | <b>Nucleus</b>               | 1H                   |
| <b>Number of Transients</b>   | 16                                           | <b>Origin</b>               | spect                | <b>Original Points Count</b> | 32768                |
| <b>Points Count</b>           | 32768                                        | <b>Pulse Sequence</b>       | zg30                 | <b>Receiver Gain</b>         | 86.78                |
| <b>Solvent</b>                | DMSO-d6                                      | <b>Spectrum Offset (Hz)</b> | 2470.9255            | <b>Spectrum Type</b>         | STANDARD             |
| <b>Temperature (degree C)</b> | 22.609                                       |                             |                      | <b>SW(cyclical) (Hz)</b>     | 8012.82              |
|                               |                                              |                             |                      | <b>Sweep Width (Hz)</b>      | 8012.58              |

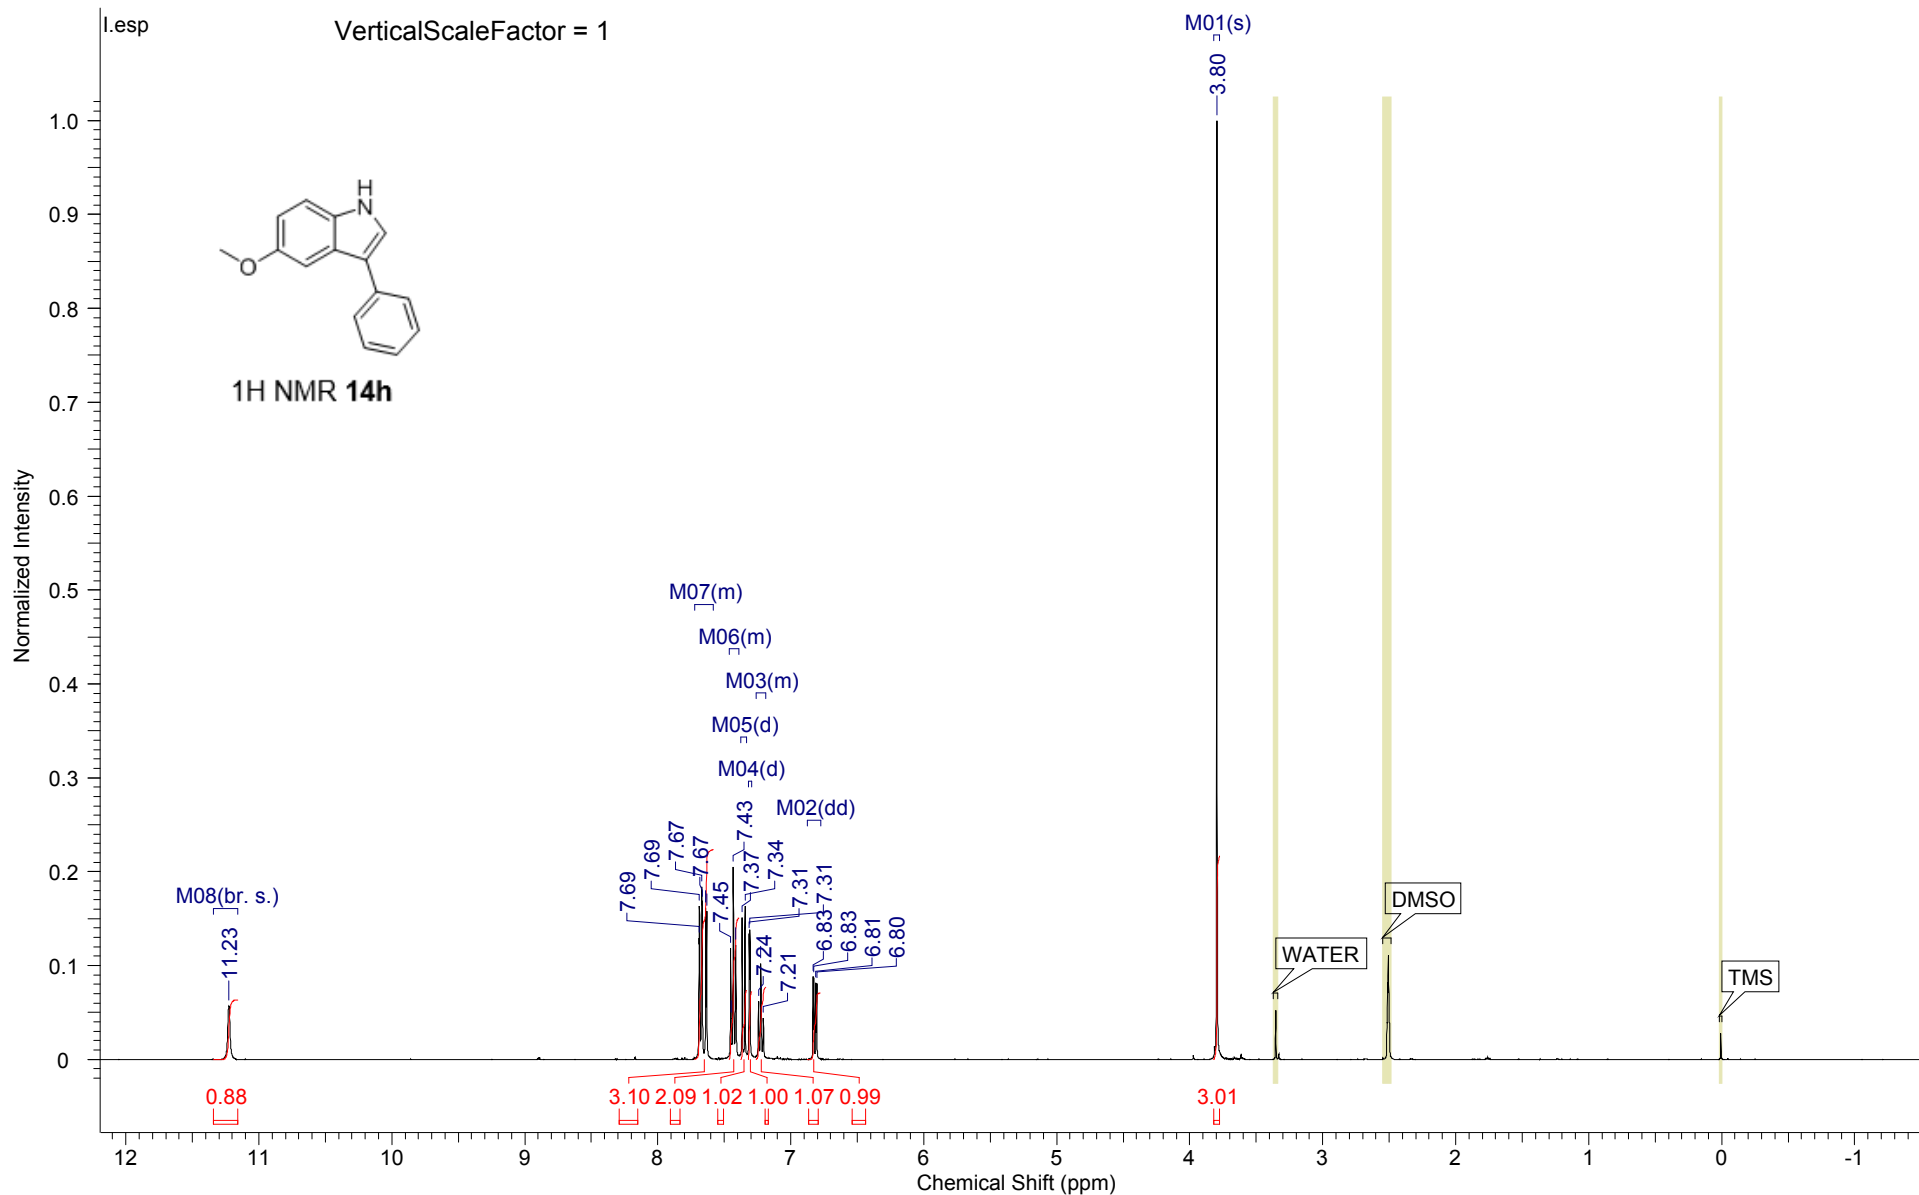

|                        |                             |                        |                      |                       |                      |
|------------------------|-----------------------------|------------------------|----------------------|-----------------------|----------------------|
| Acquisition Time (sec) | 1.3631                      | Date                   | 29 Jul 2017 11:29:20 | Date Stamp            | 29 Jul 2017 11:29:20 |
| File Name              | D:\NMR\CJO\CJO-I-CARBON.fid | Frequency (MHz)        | 100.63               | Nucleus               | 13C                  |
| Number of Transients   | 4000                        | Origin                 | spect                | Original Points Count | 32768                |
| Points Count           | 32768                       | Pulse Sequence         | zgpg30               | Receiver Gain         | 196.40               |
| Solvent                | DMSO-d6                     | Spectrum Offset (Hz)   | 10061.7803           | SW(cyclical) (Hz)     | 24038.46             |
| Sweep Width (Hz)       | 24037.73                    | Temperature (degree C) | 23.142               | Spectrum Type         | STANDARD             |

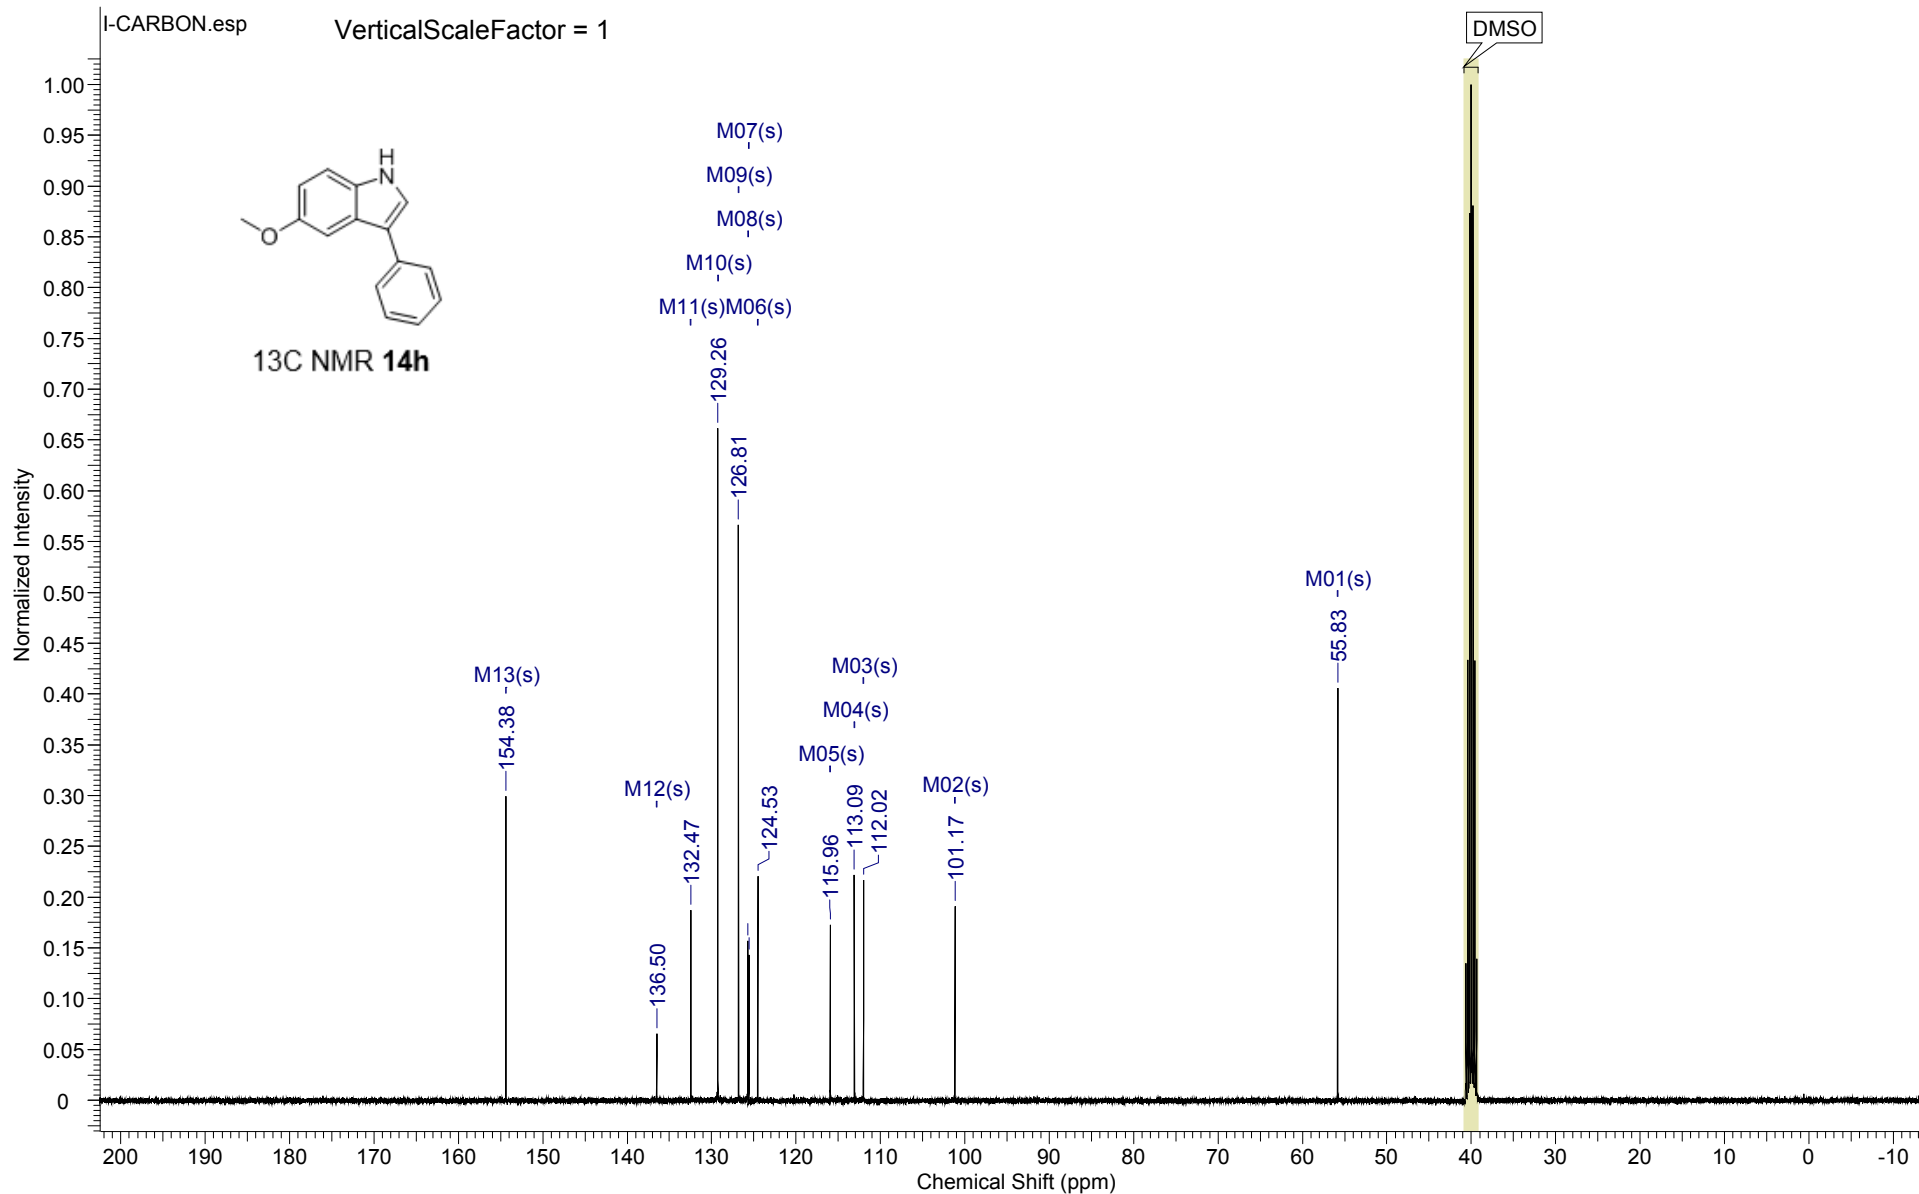

|                               |                        |                               |                        |                   |                      |                             |                             |                       |          |
|-------------------------------|------------------------|-------------------------------|------------------------|-------------------|----------------------|-----------------------------|-----------------------------|-----------------------|----------|
| <b>Acquisition Time (sec)</b> | 4.0894                 | <b>Date</b>                   | 03 Aug 2017 08:23:44   | <b>Date Stamp</b> | 03 Aug 2017 08:23:44 |                             |                             |                       |          |
| <b>File Name</b>              | D:\NMR\CJO\CJO-B\3\fid |                               | <b>Frequency (MHz)</b> | 400.15            | <b>Nucleus</b>       | 1H                          | <b>Number of Transients</b> | 32                    |          |
| <b>Origin</b>                 | spect                  | <b>Original Points Count</b>  | 32768                  | <b>Owner</b>      | IND-NMR              | <b>Points Count</b>         | 32768                       | <b>Pulse Sequence</b> | zg30     |
| <b>Receiver Gain</b>          | 30.74                  | <b>SW(cyclical) (Hz)</b>      | 8012.82                | <b>Solvent</b>    | DMSO-d6              | <b>Spectrum Offset (Hz)</b> | 2470.9260                   | <b>Spectrum Type</b>  | STANDARD |
| <b>Sweep Width (Hz)</b>       | 8012.58                | <b>Temperature (degree C)</b> | 22.511                 |                   |                      |                             |                             |                       |          |

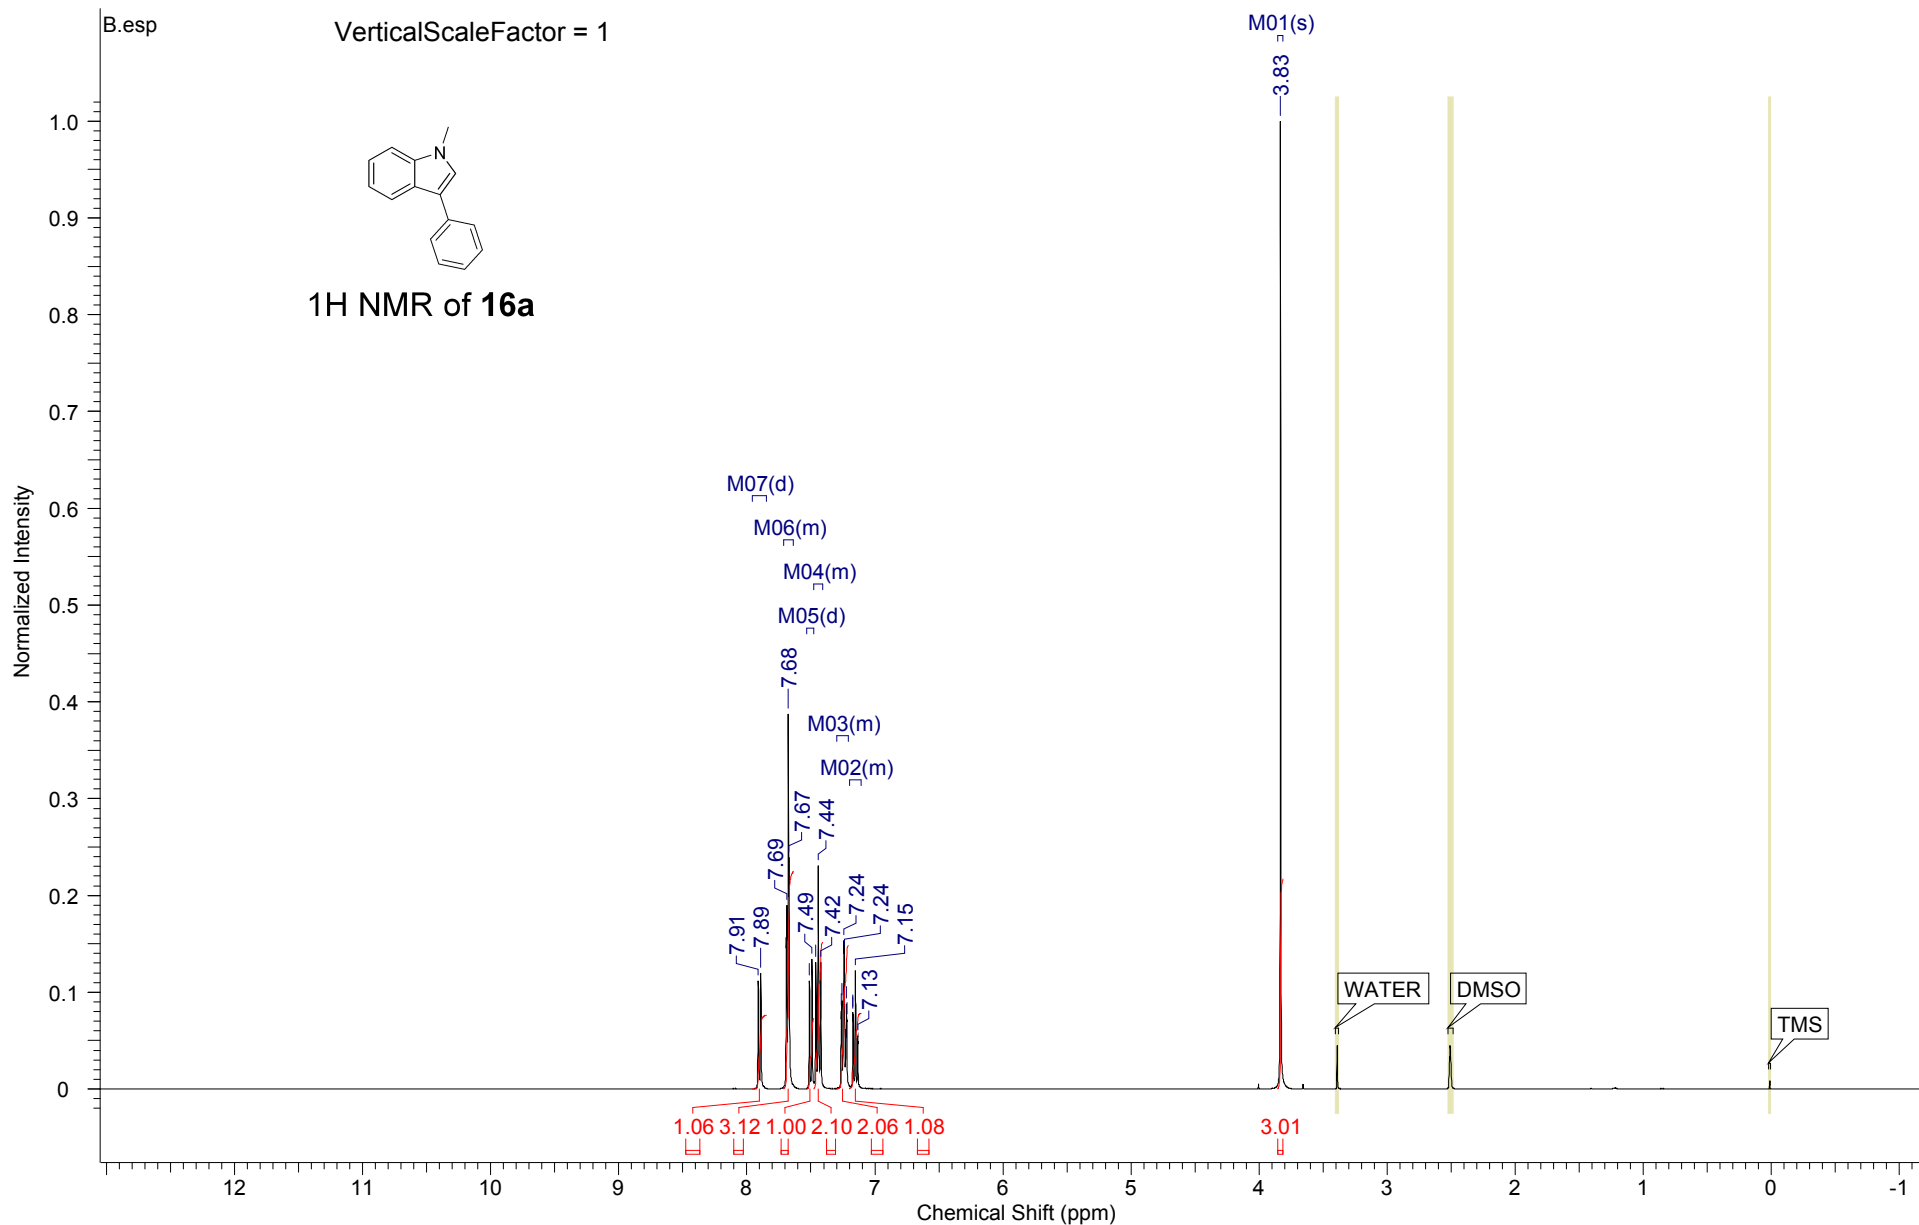



|                               |                             |                               |                      |                              |                      |
|-------------------------------|-----------------------------|-------------------------------|----------------------|------------------------------|----------------------|
| <b>Acquisition Time (sec)</b> | 1.3631                      | <b>Date</b>                   | 29 Jul 2017 00:53:36 | <b>Date Stamp</b>            | 29 Jul 2017 00:53:36 |
| <b>File Name</b>              | D:\NMR\CJO\CJO-B\CARBON\fid | <b>Frequency (MHz)</b>        | 100.63               | <b>Nucleus</b>               | 13C                  |
| <b>Number of Transients</b>   | 3000                        | <b>Origin</b>                 | spect                | <b>Original Points Count</b> | 32768                |
| <b>Points Count</b>           | 32768                       | <b>Pulse Sequence</b>         | zgpg30               | <b>Receiver Gain</b>         | 196.40               |
| <b>Solvent</b>                | DMSO-d6                     | <b>Spectrum Offset (Hz)</b>   | 10061.7803           | <b>SW(cyclical) (Hz)</b>     | 24038.46             |
| <b>Sweep Width (Hz)</b>       | 24037.73                    | <b>Temperature (degree C)</b> | 23.252               | <b>Spectrum Type</b>         | STANDARD             |

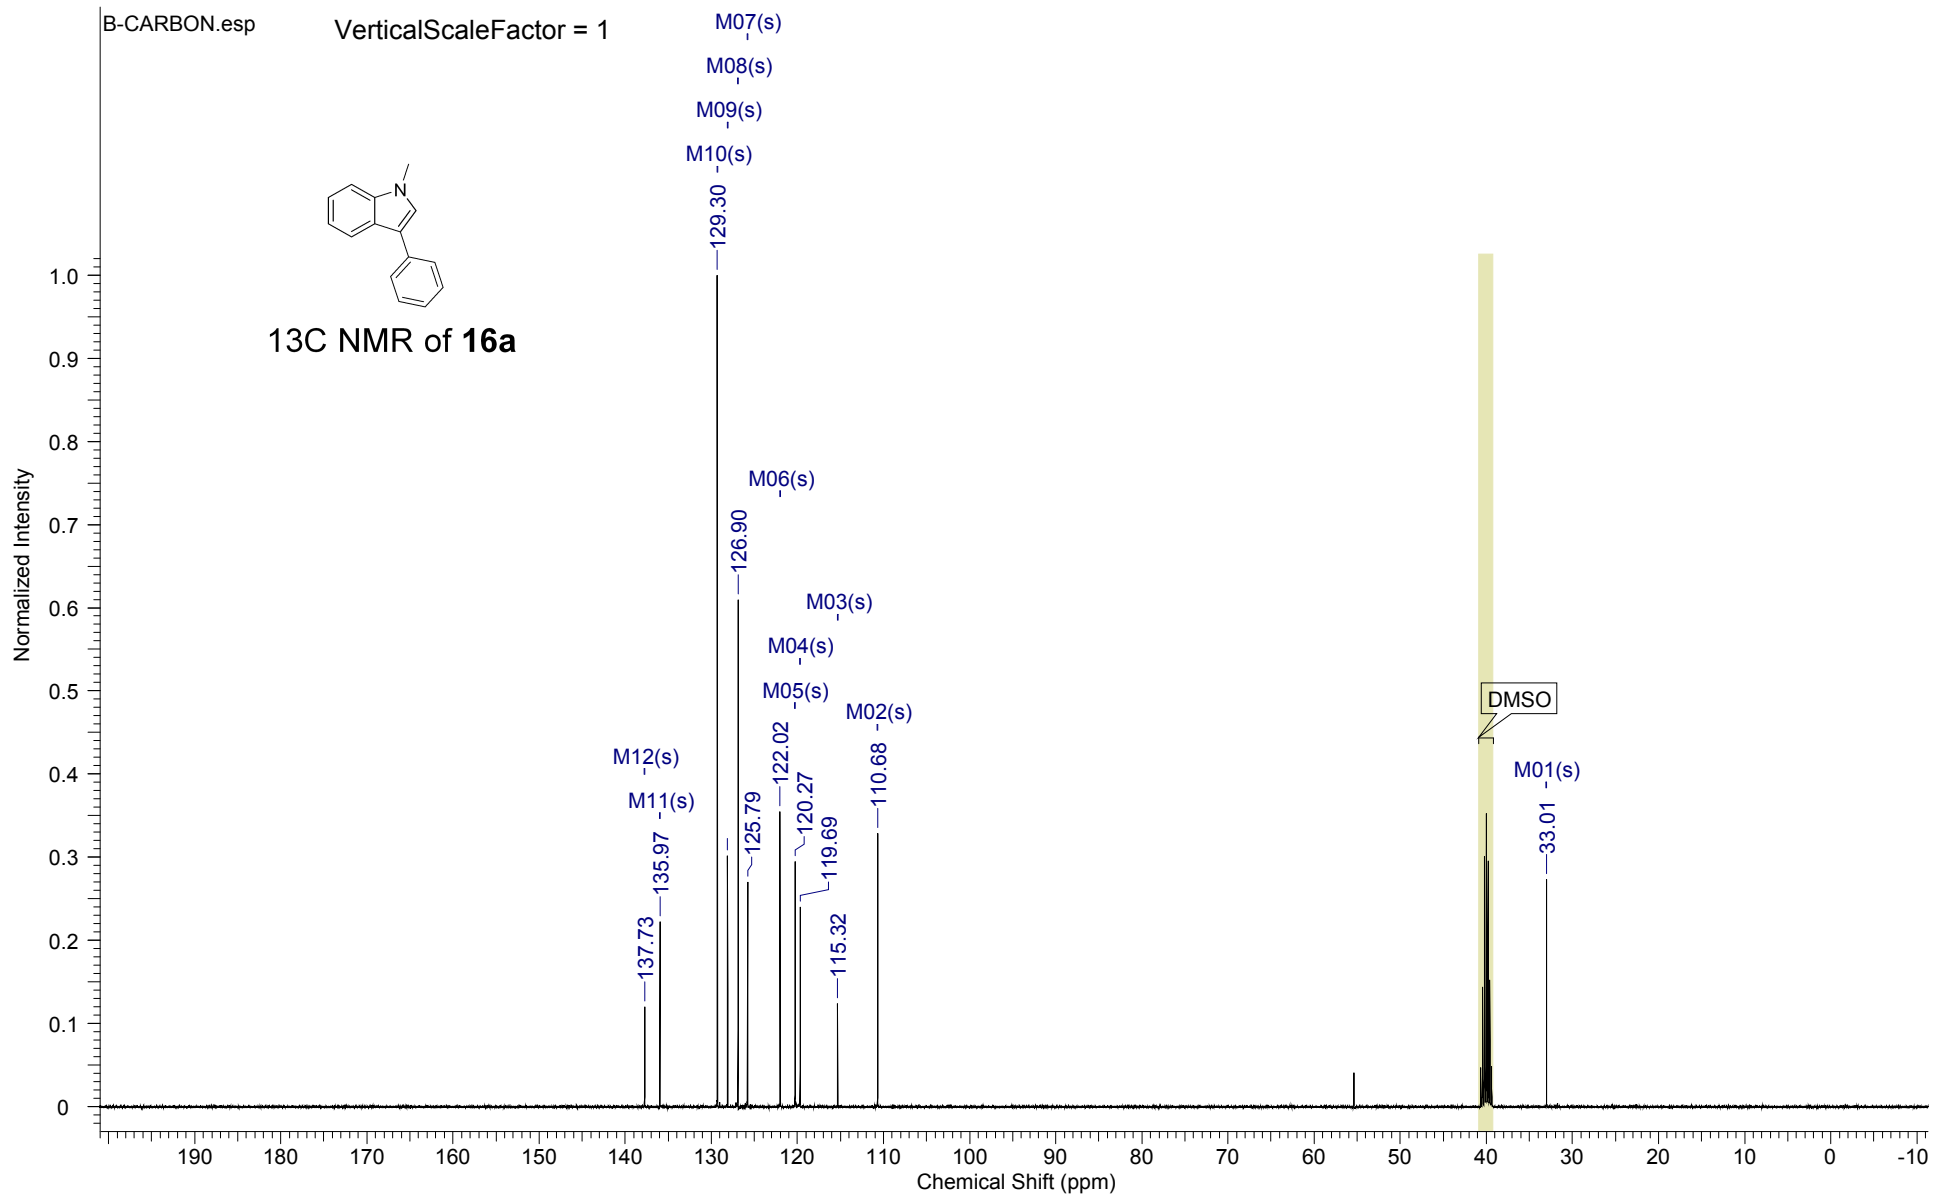

|                        |                        |                        |                      |                      |                      |
|------------------------|------------------------|------------------------|----------------------|----------------------|----------------------|
| Acquisition Time (sec) | 4.0894                 | Date                   | 03 Aug 2017 08:30:08 | Date Stamp           | 03 Aug 2017 08:30:08 |
| File Name              | D:\NMR\CJO\CJO-C\3\fid | Frequency (MHz)        | 400.15               | Nucleus              | <sup>1</sup> H       |
| Origin                 | spect                  | Original Points Count  | 32768                | Owner                | IND-NMR              |
| Receiver Gain          | 110.38                 | SW(cyclical) (Hz)      | 8012.82              | Points Count         | 32768                |
| Sweep Width (Hz)       | 8012.58                | Solvent                | DMSO-d6              | Spectrum Offset (Hz) | 2470.9260            |
|                        |                        | Temperature (degree C) | 22.498               | Number of Transients | 32                   |
|                        |                        |                        |                      | Pulse Sequence       | zg30                 |
|                        |                        |                        |                      | Spectrum Type        | STANDARD             |

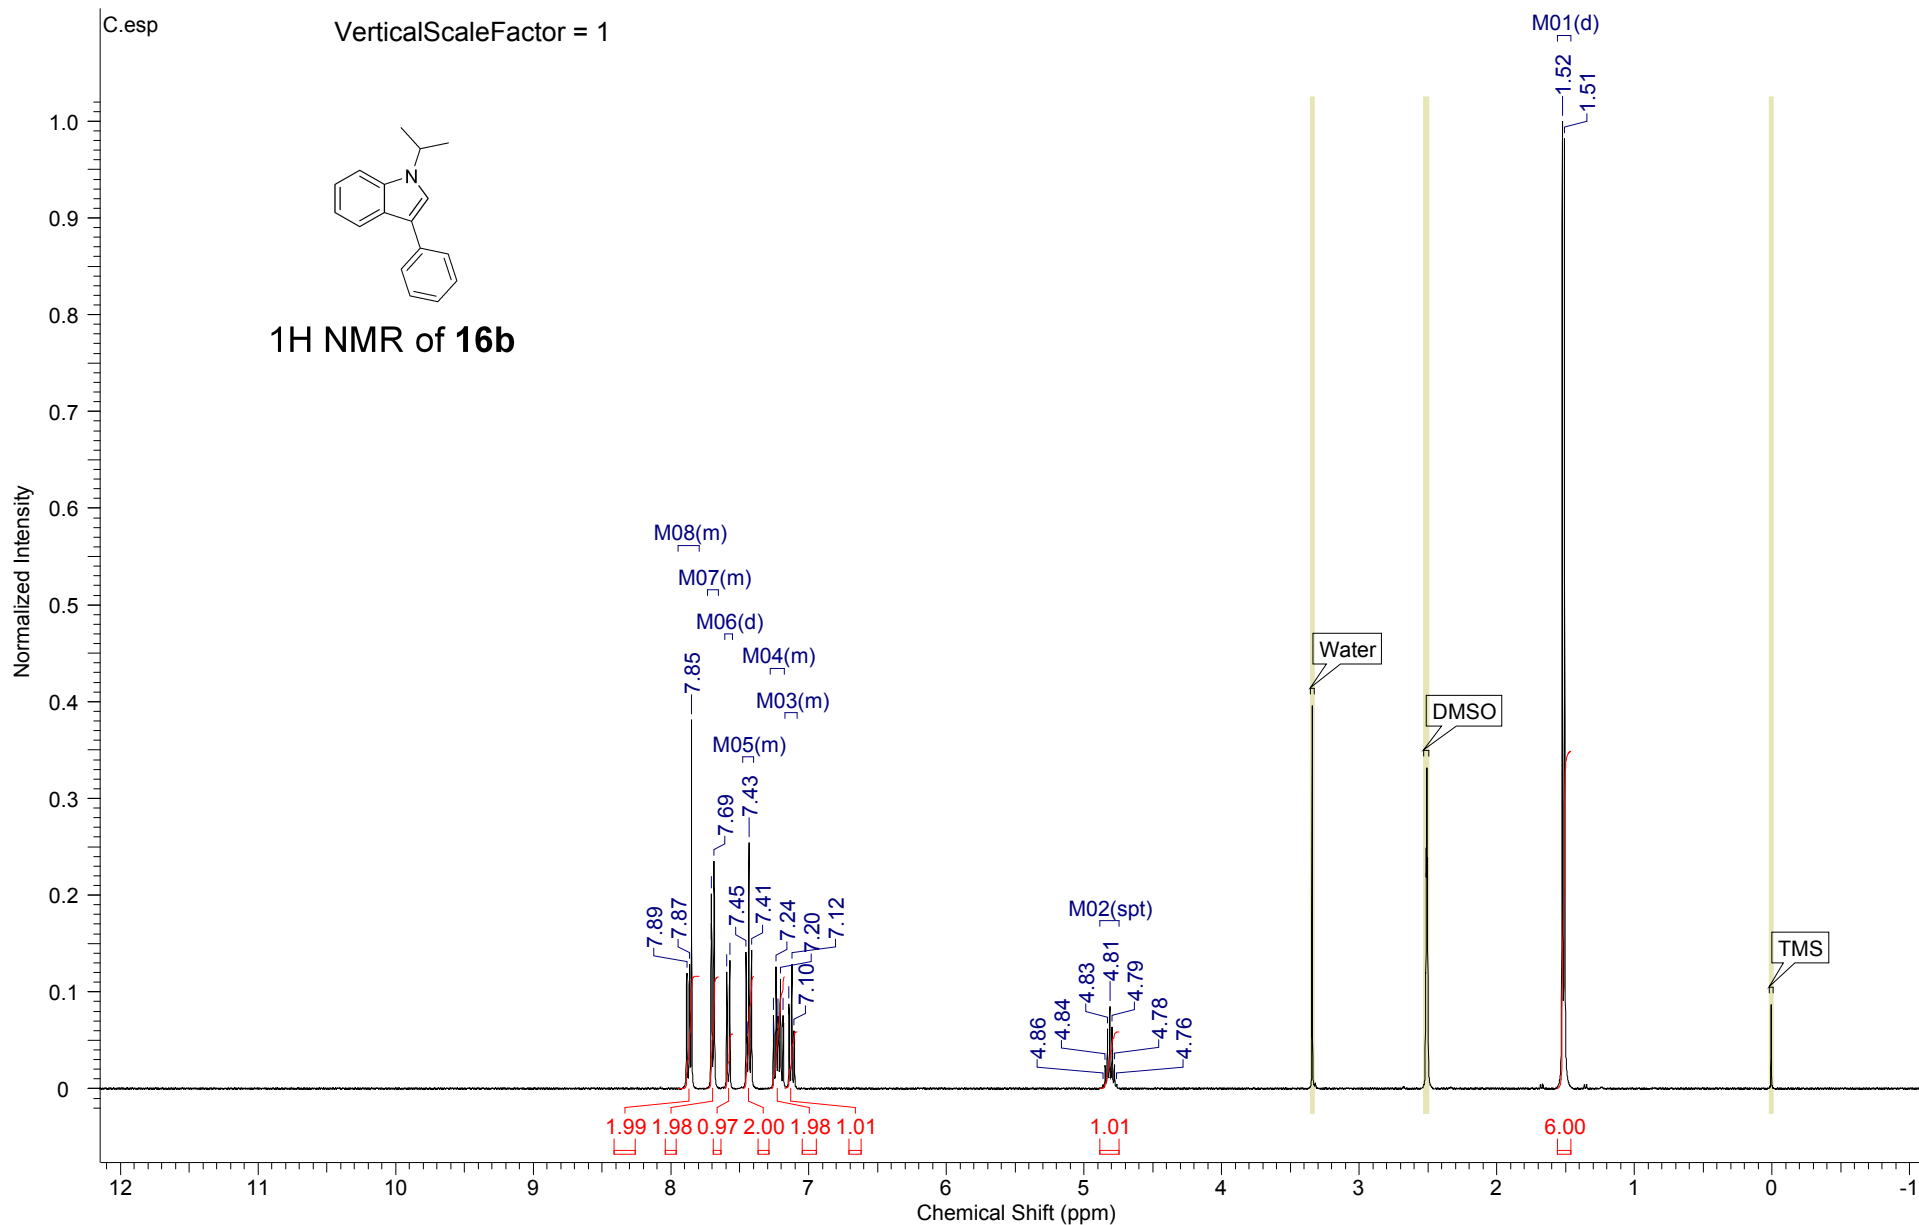

|                               |                             |                               |                        |                              |                   |                          |          |
|-------------------------------|-----------------------------|-------------------------------|------------------------|------------------------------|-------------------|--------------------------|----------|
| <b>Acquisition Time (sec)</b> | 1.3631                      | <b>Date</b>                   | 30 Jul 2017 04:26:56   |                              | <b>Date Stamp</b> | 30 Jul 2017 04:26:56     |          |
| <b>File Name</b>              | D:\NMR\CJO\CJO-C\CARBON\fid |                               | <b>Frequency (MHz)</b> | 100.63                       | <b>Nucleus</b>    | 13C                      |          |
| <b>Number of Transients</b>   | 4000                        | <b>Origin</b>                 | spect                  | <b>Original Points Count</b> | 32768             | <b>Owner</b>             | IND-NMR  |
| <b>Points Count</b>           | 32768                       | <b>Pulse Sequence</b>         | zgpg30                 | <b>Receiver Gain</b>         | 196.40            | <b>SW(cyclical) (Hz)</b> | 24038.46 |
| <b>Solvent</b>                | DMSO-d6                     | <b>Spectrum Offset (Hz)</b>   | 10061.7803             | <b>Spectrum Type</b>         | STANDARD          |                          |          |
| <b>Sweep Width (Hz)</b>       | 24037.73                    | <b>Temperature (degree C)</b> | 23.182                 |                              |                   |                          |          |

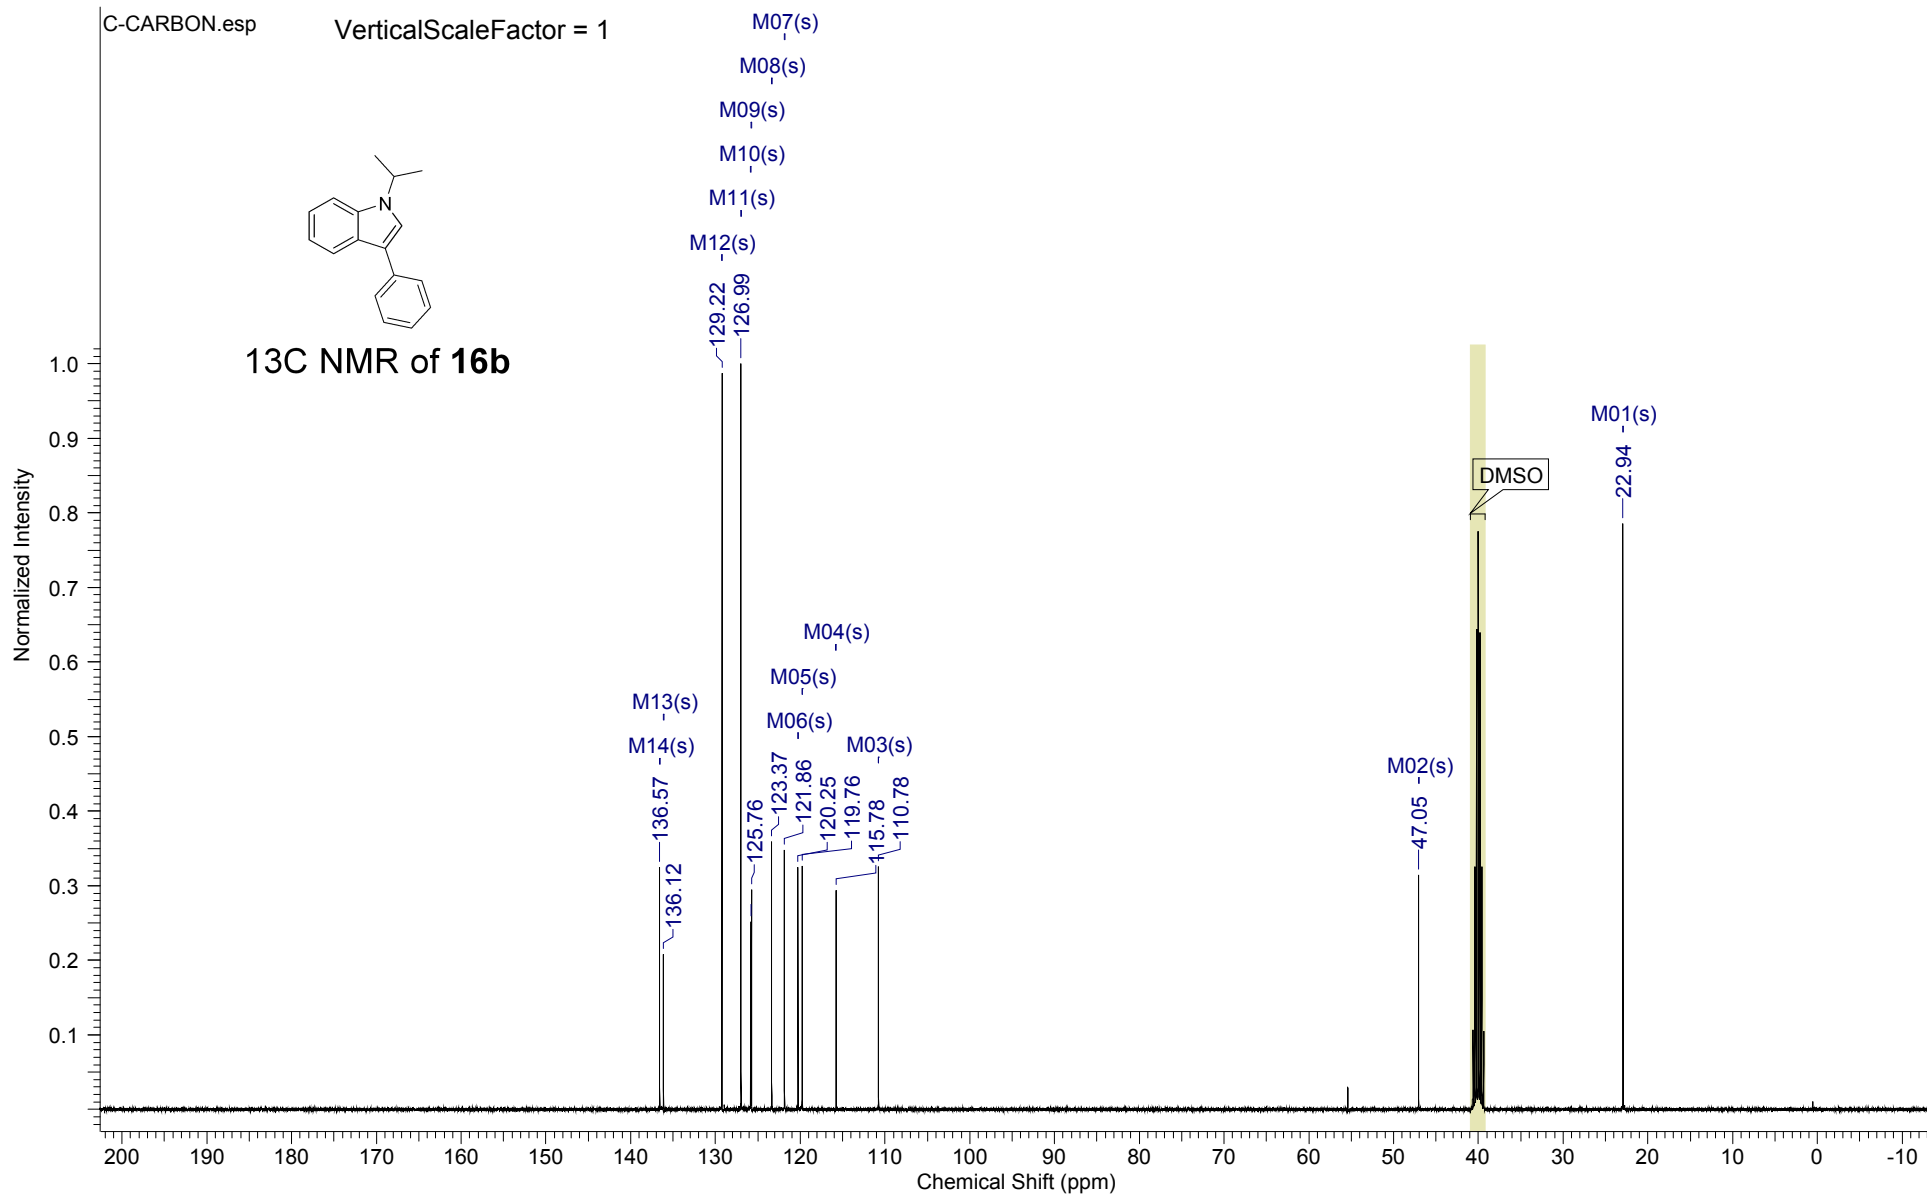

|                        |                        |                        |                      |                      |                      |
|------------------------|------------------------|------------------------|----------------------|----------------------|----------------------|
| Acquisition Time (sec) | 4.0894                 | Date                   | 03 Aug 2017 08:34:24 | Date Stamp           | 03 Aug 2017 08:34:24 |
| File Name              | D:\NMR\CJO\CJO-D\3\fid | Frequency (MHz)        | 400.15               | Nucleus              | <sup>1</sup> H       |
| Origin                 | spect                  | Original Points Count  | 32768                | Owner                | IND-NMR              |
| Receiver Gain          | 77.61                  | SW(cyclical) (Hz)      | 8012.82              | Points Count         | 32768                |
| Sweep Width (Hz)       | 8012.58                | Solvent                | DMSO-d6              | Spectrum Offset (Hz) | 2470.9260            |
|                        |                        | Temperature (degree C) | 22.496               | Number of Transients | 32                   |
|                        |                        |                        |                      | Pulse Sequence       | zg30                 |
|                        |                        |                        |                      | Spectrum Type        | STANDARD             |

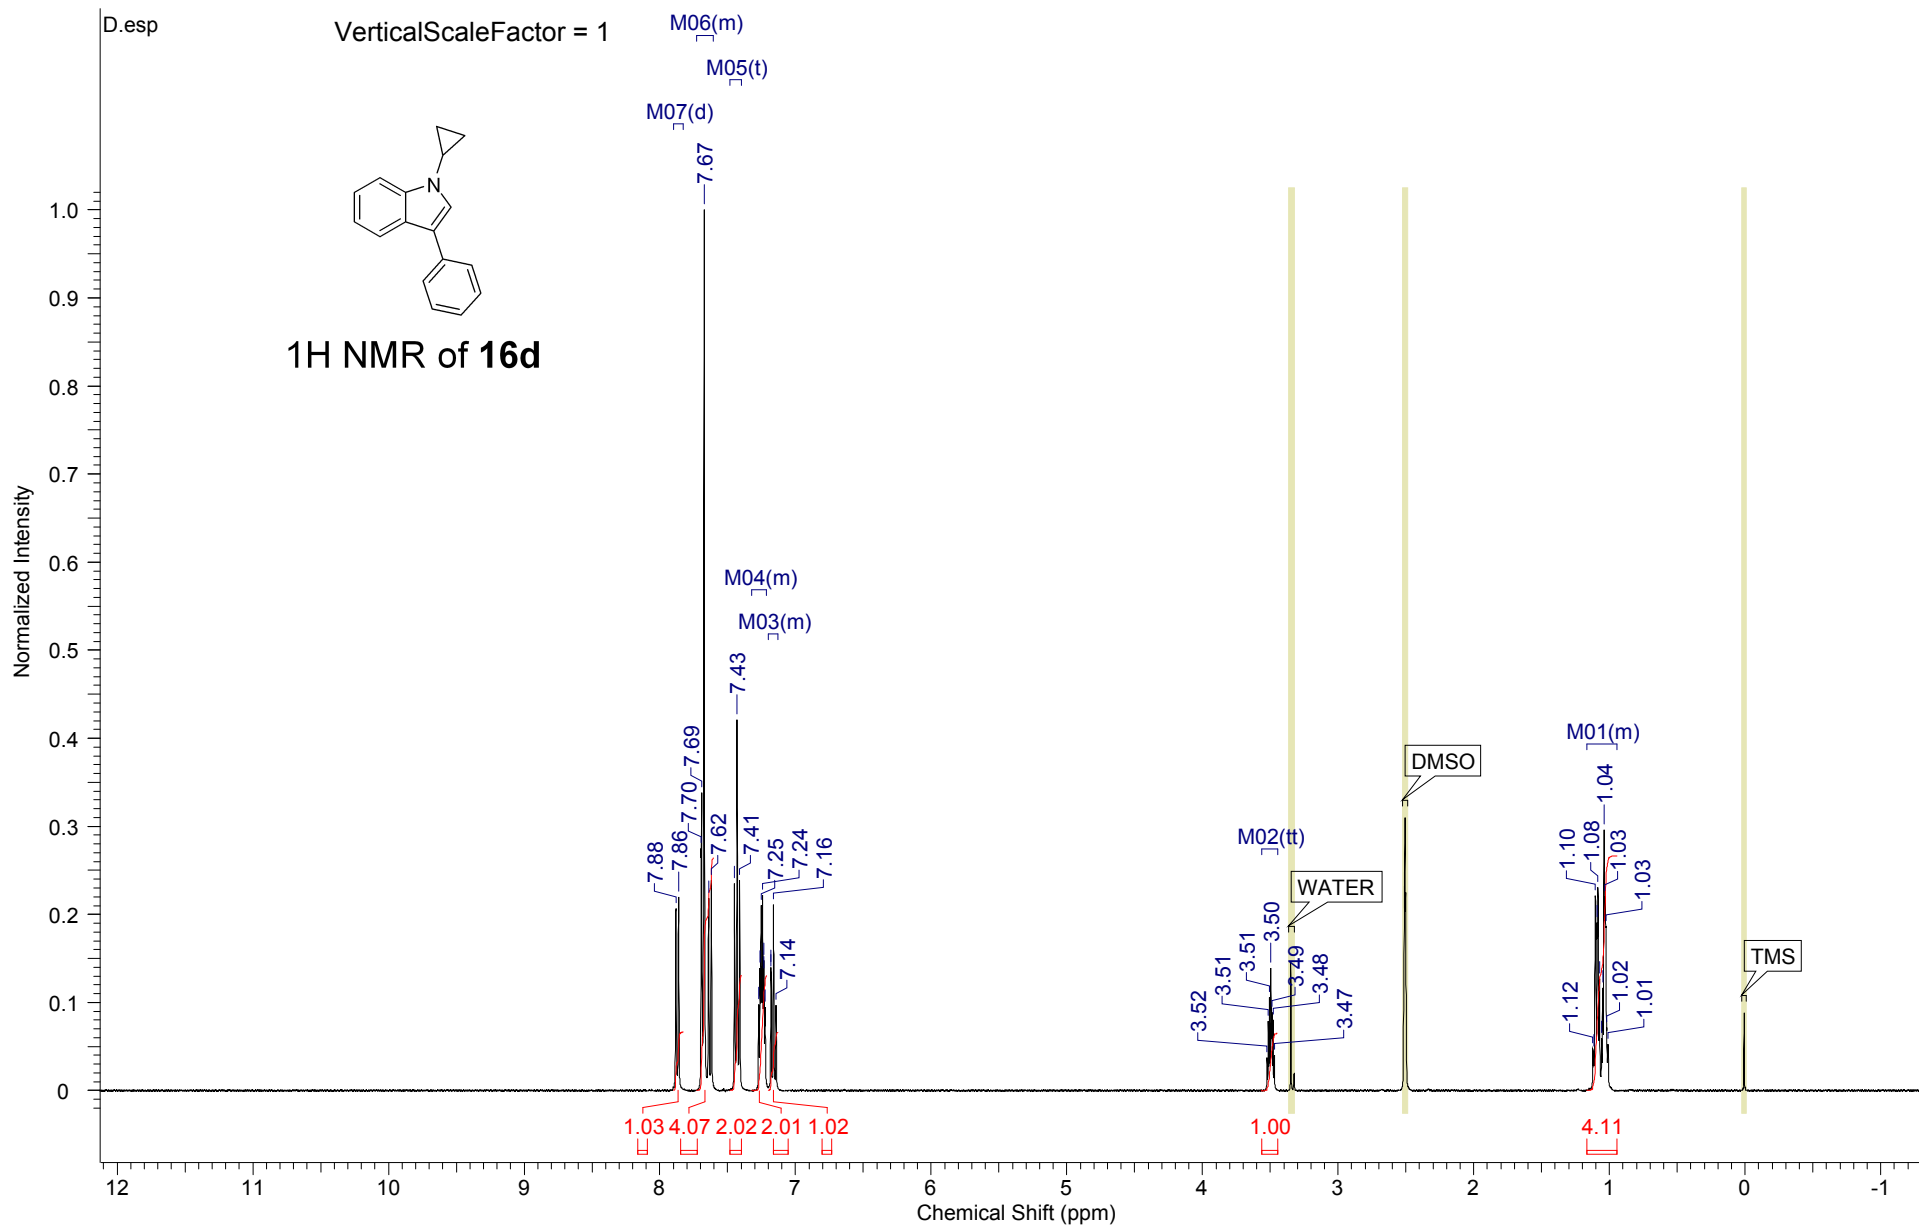

|                               |                             |                               |                      |                              |                      |
|-------------------------------|-----------------------------|-------------------------------|----------------------|------------------------------|----------------------|
| <b>Acquisition Time (sec)</b> | 1.3631                      | <b>Date</b>                   | 30 Jul 2017 00:34:24 | <b>Date Stamp</b>            | 30 Jul 2017 00:34:24 |
| <b>File Name</b>              | D:\NMR\CJO\CJO-D\CARBON\fid | <b>Frequency (MHz)</b>        | 100.63               | <b>Nucleus</b>               | 13C                  |
| <b>Number of Transients</b>   | 4000                        | <b>Origin</b>                 | spect                | <b>Original Points Count</b> | 32768                |
| <b>Points Count</b>           | 32768                       | <b>Pulse Sequence</b>         | zgpg30               | <b>Receiver Gain</b>         | 196.40               |
| <b>Solvent</b>                | DMSO-d6                     | <b>Spectrum Offset (Hz)</b>   | 10061.7803           | <b>SW(cyclical) (Hz)</b>     | 24038.46             |
| <b>Sweep Width (Hz)</b>       | 24037.73                    | <b>Temperature (degree C)</b> | 23.021               | <b>Spectrum Type</b>         | STANDARD             |

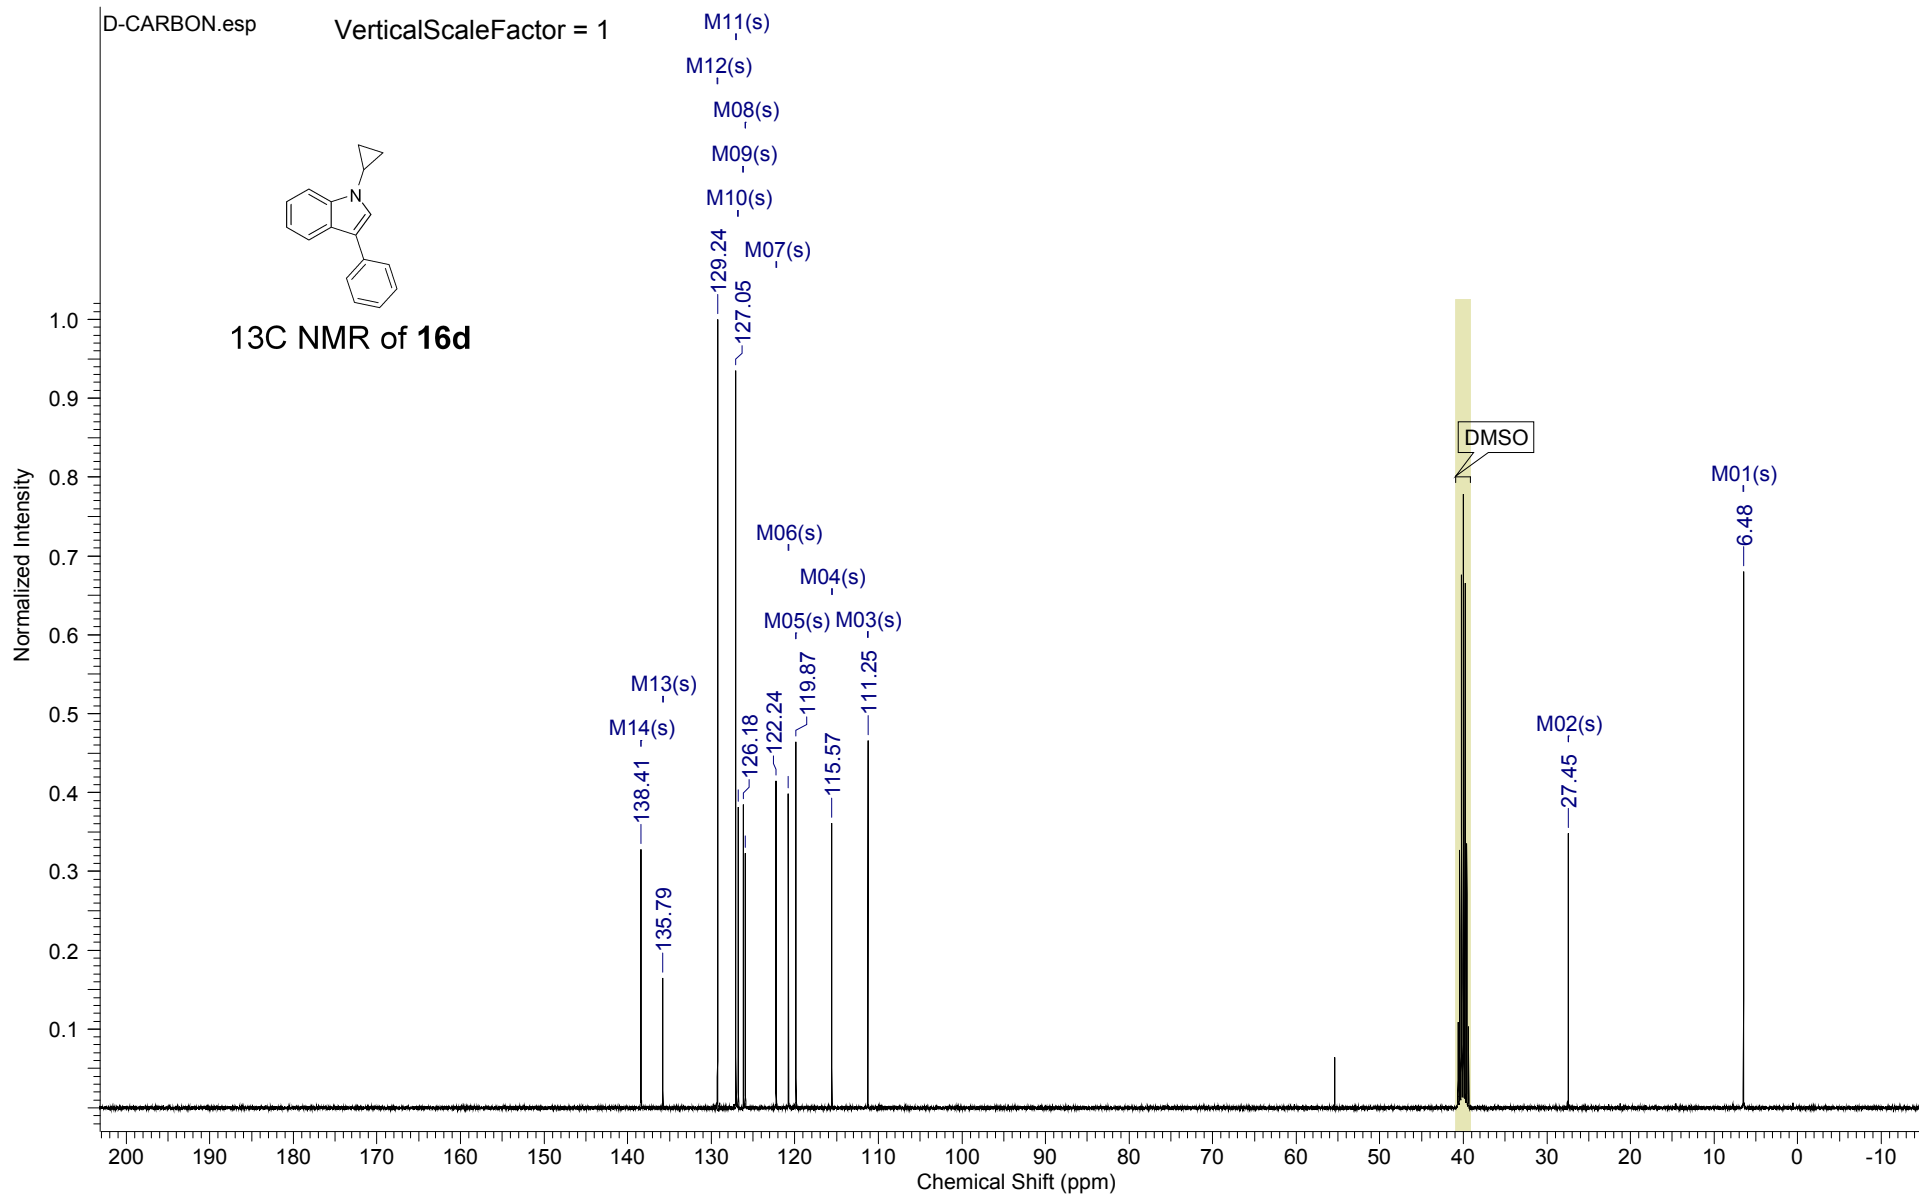

|                        |                            |                        |                      |                      |                      |
|------------------------|----------------------------|------------------------|----------------------|----------------------|----------------------|
| Acquisition Time (sec) | 4.0894                     | Date                   | 16 Aug 2017 14:28:32 | Date Stamp           | 16 Aug 2017 14:28:32 |
| File Name              | D:\CJO-UCSF\NMR\CJO-M1\fid | Frequency (MHz)        | 400.15               | Nucleus              | <sup>1</sup> H       |
| Origin                 | spect                      | Original Points Count  | 32768                | Owner                | IND-NMR              |
| Receiver Gain          | 110.38                     | SW(cyclical) (Hz)      | 8012.82              | Points Count         | 32768                |
| Sweep Width (Hz)       | 8012.58                    | Temperature (degree C) | 22.730               | Spectrum Offset (Hz) | 2470.9260            |
|                        |                            |                        |                      | Number of Transients | 32                   |
|                        |                            |                        |                      | Pulse Sequence       | zg30                 |
|                        |                            |                        |                      | Solvent              | DMSO-d6              |
|                        |                            |                        |                      | Spectrum Type        | STANDARD             |

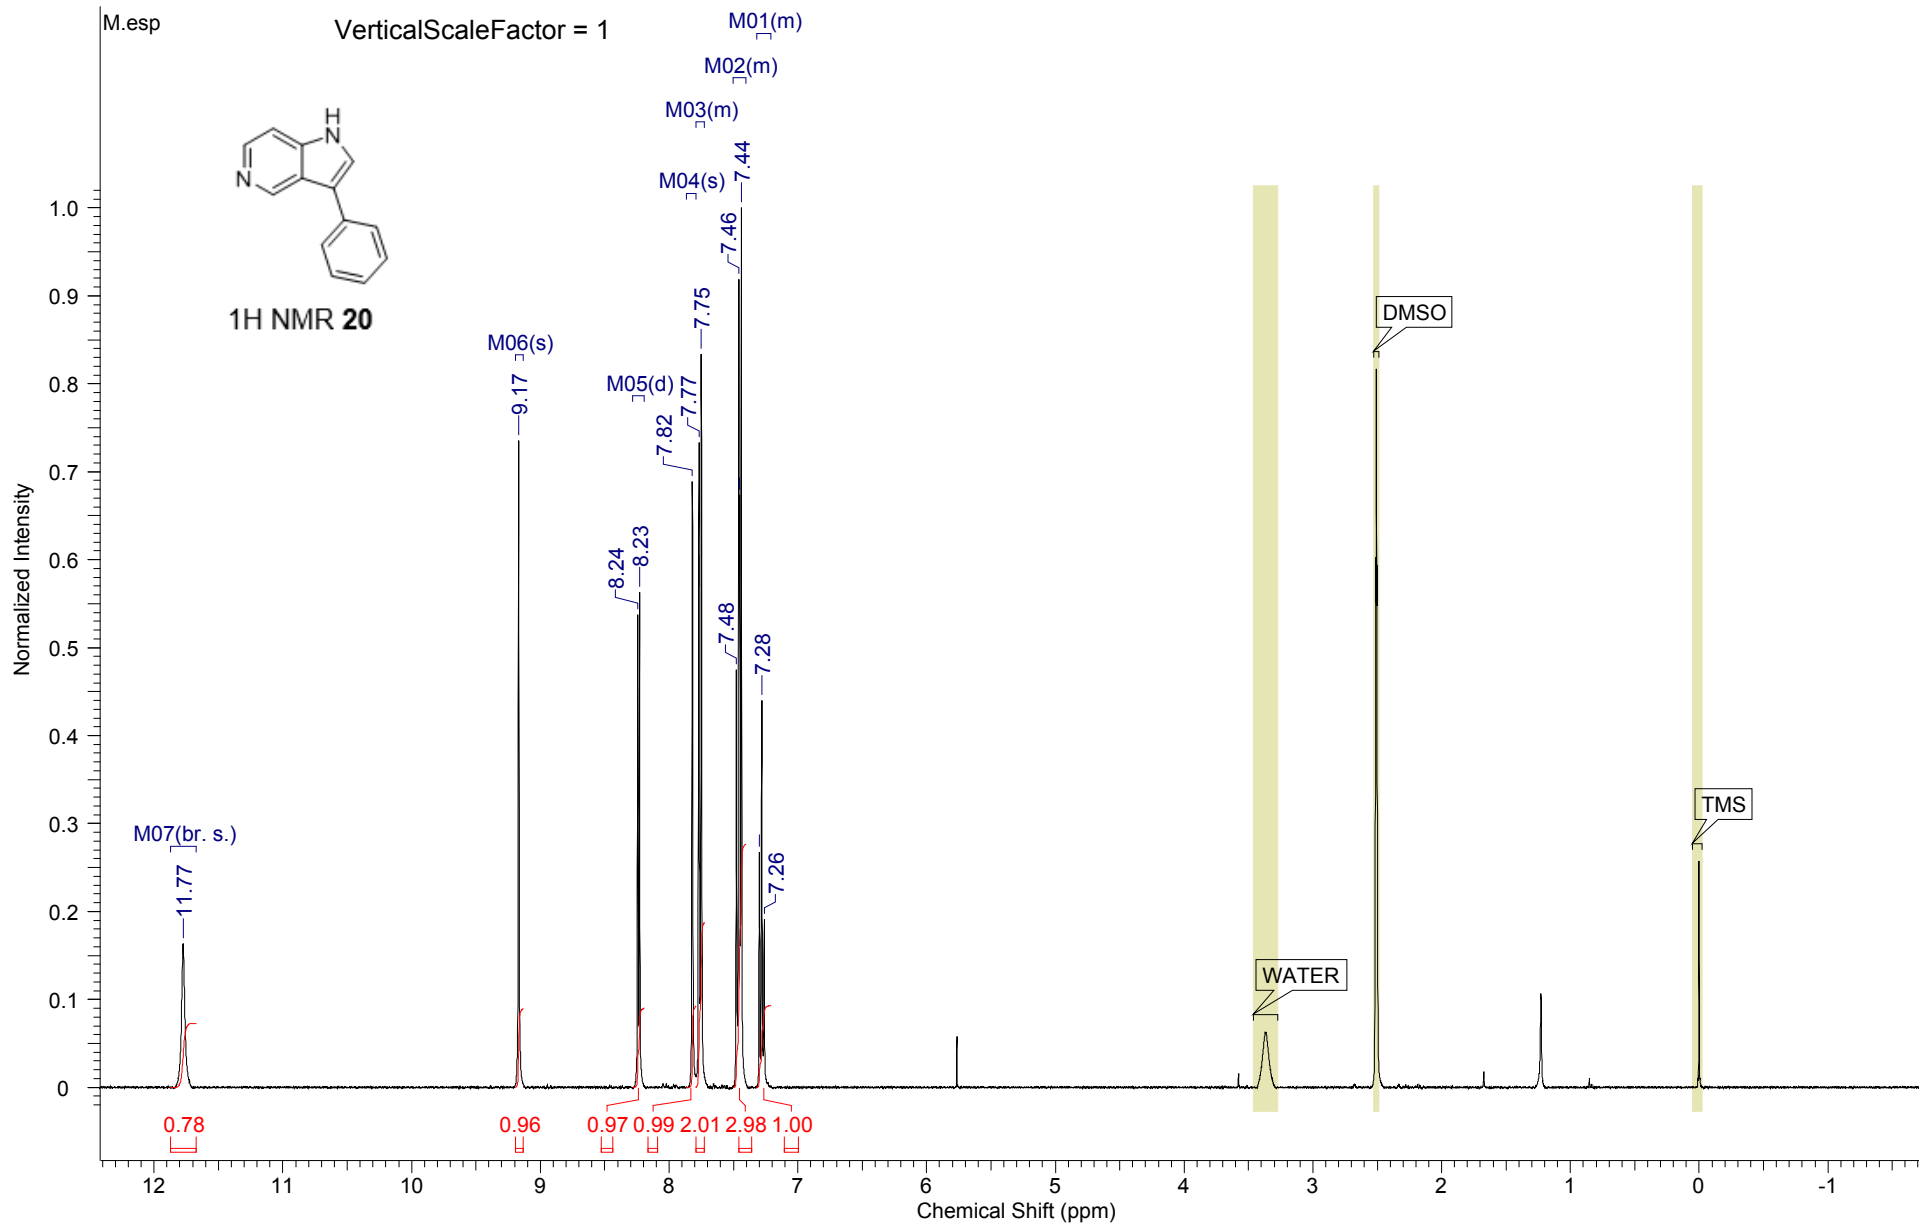

|                               |                            |                             |                      |                              |                      |
|-------------------------------|----------------------------|-----------------------------|----------------------|------------------------------|----------------------|
| <b>Acquisition Time (sec)</b> | 1.3631                     | <b>Date</b>                 | 17 Aug 2017 05:45:52 | <b>Date Stamp</b>            | 17 Aug 2017 05:45:52 |
| <b>File Name</b>              | D:\CJO-UCSF\NMR\CJO-M2\fid | <b>Frequency (MHz)</b>      | 100.63               | <b>Nucleus</b>               | 13C                  |
| <b>Number of Transients</b>   | 2000                       | <b>Origin</b>               | spect                | <b>Original Points Count</b> | 32768                |
| <b>Points Count</b>           | 32768                      | <b>Pulse Sequence</b>       | zgpg30               | <b>Receiver Gain</b>         | 196.40               |
| <b>Solvent</b>                | DMSO-d6                    | <b>Spectrum Offset (Hz)</b> | 10061.7803           | <b>Spectrum Type</b>         | STANDARD             |
| <b>Temperature (degree C)</b> | 23.262                     |                             |                      | <b>SW(cyclical) (Hz)</b>     | 24038.46             |
|                               |                            |                             |                      | <b>Sweep Width (Hz)</b>      | 24037.73             |

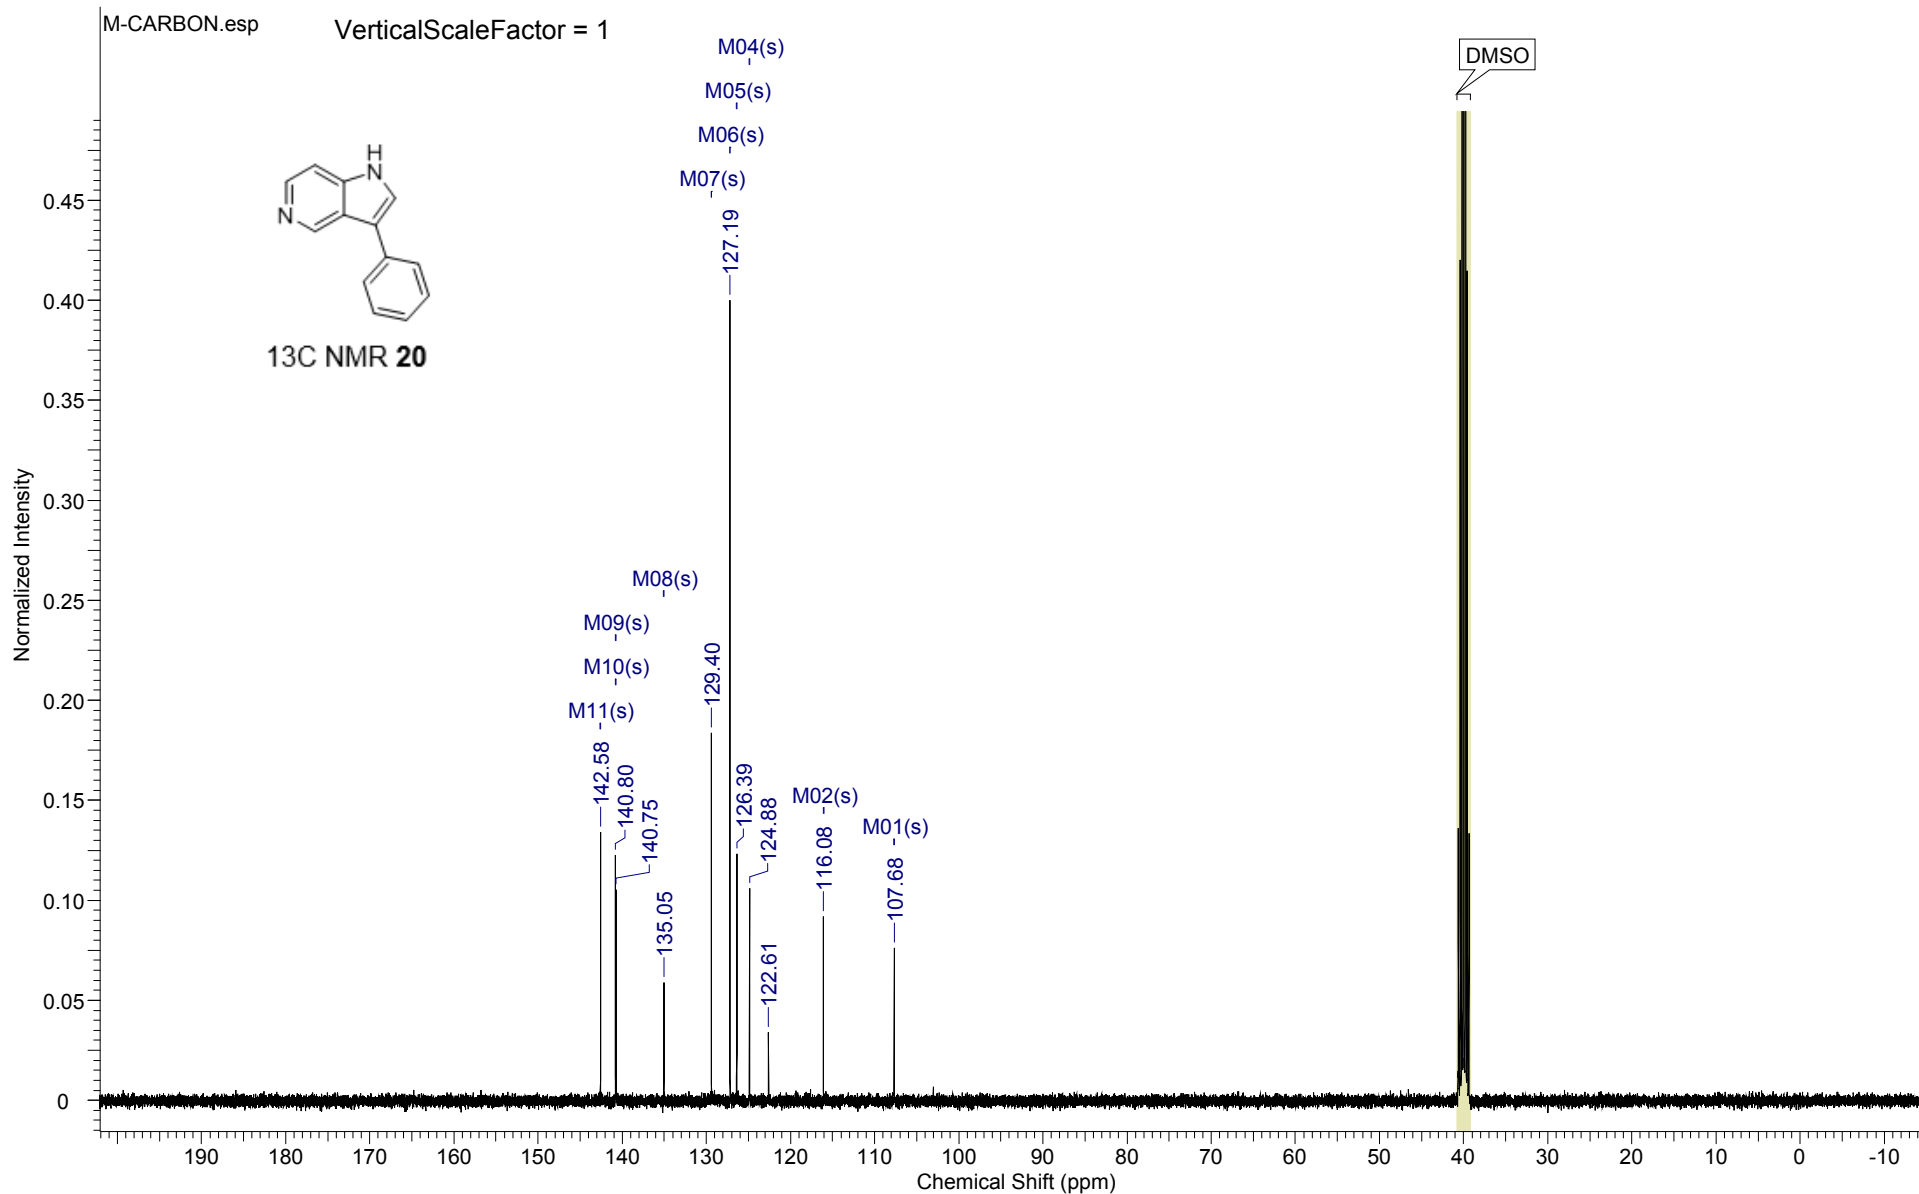

|                        |                             |                        |                      |                      |                      |
|------------------------|-----------------------------|------------------------|----------------------|----------------------|----------------------|
| Acquisition Time (sec) | 4.0894                      | Date                   | 10 Aug 2017 08:51:28 | Date Stamp           | 10 Aug 2017 08:51:28 |
| File Name              | D:\CJO-UCSF\NMR\CJO-Q\1\fid | Frequency (MHz)        | 400.15               | Nucleus              | <sup>1</sup> H       |
| Origin                 | spect                       | Original Points Count  | 32768                | Owner                | IND-NMR              |
| Receiver Gain          | 110.38                      | SW(cyclical) (Hz)      | 8012.82              | Points Count         | 32768                |
| Sweep Width (Hz)       | 8012.58                     | Temperature (degree C) | 22.607               | Spectrum Offset (Hz) | 2470.9260            |
|                        |                             |                        |                      | Number of Transients | 32                   |
|                        |                             |                        |                      | Pulse Sequence       | zg30                 |
|                        |                             |                        |                      | Spectrum Type        | STANDARD             |

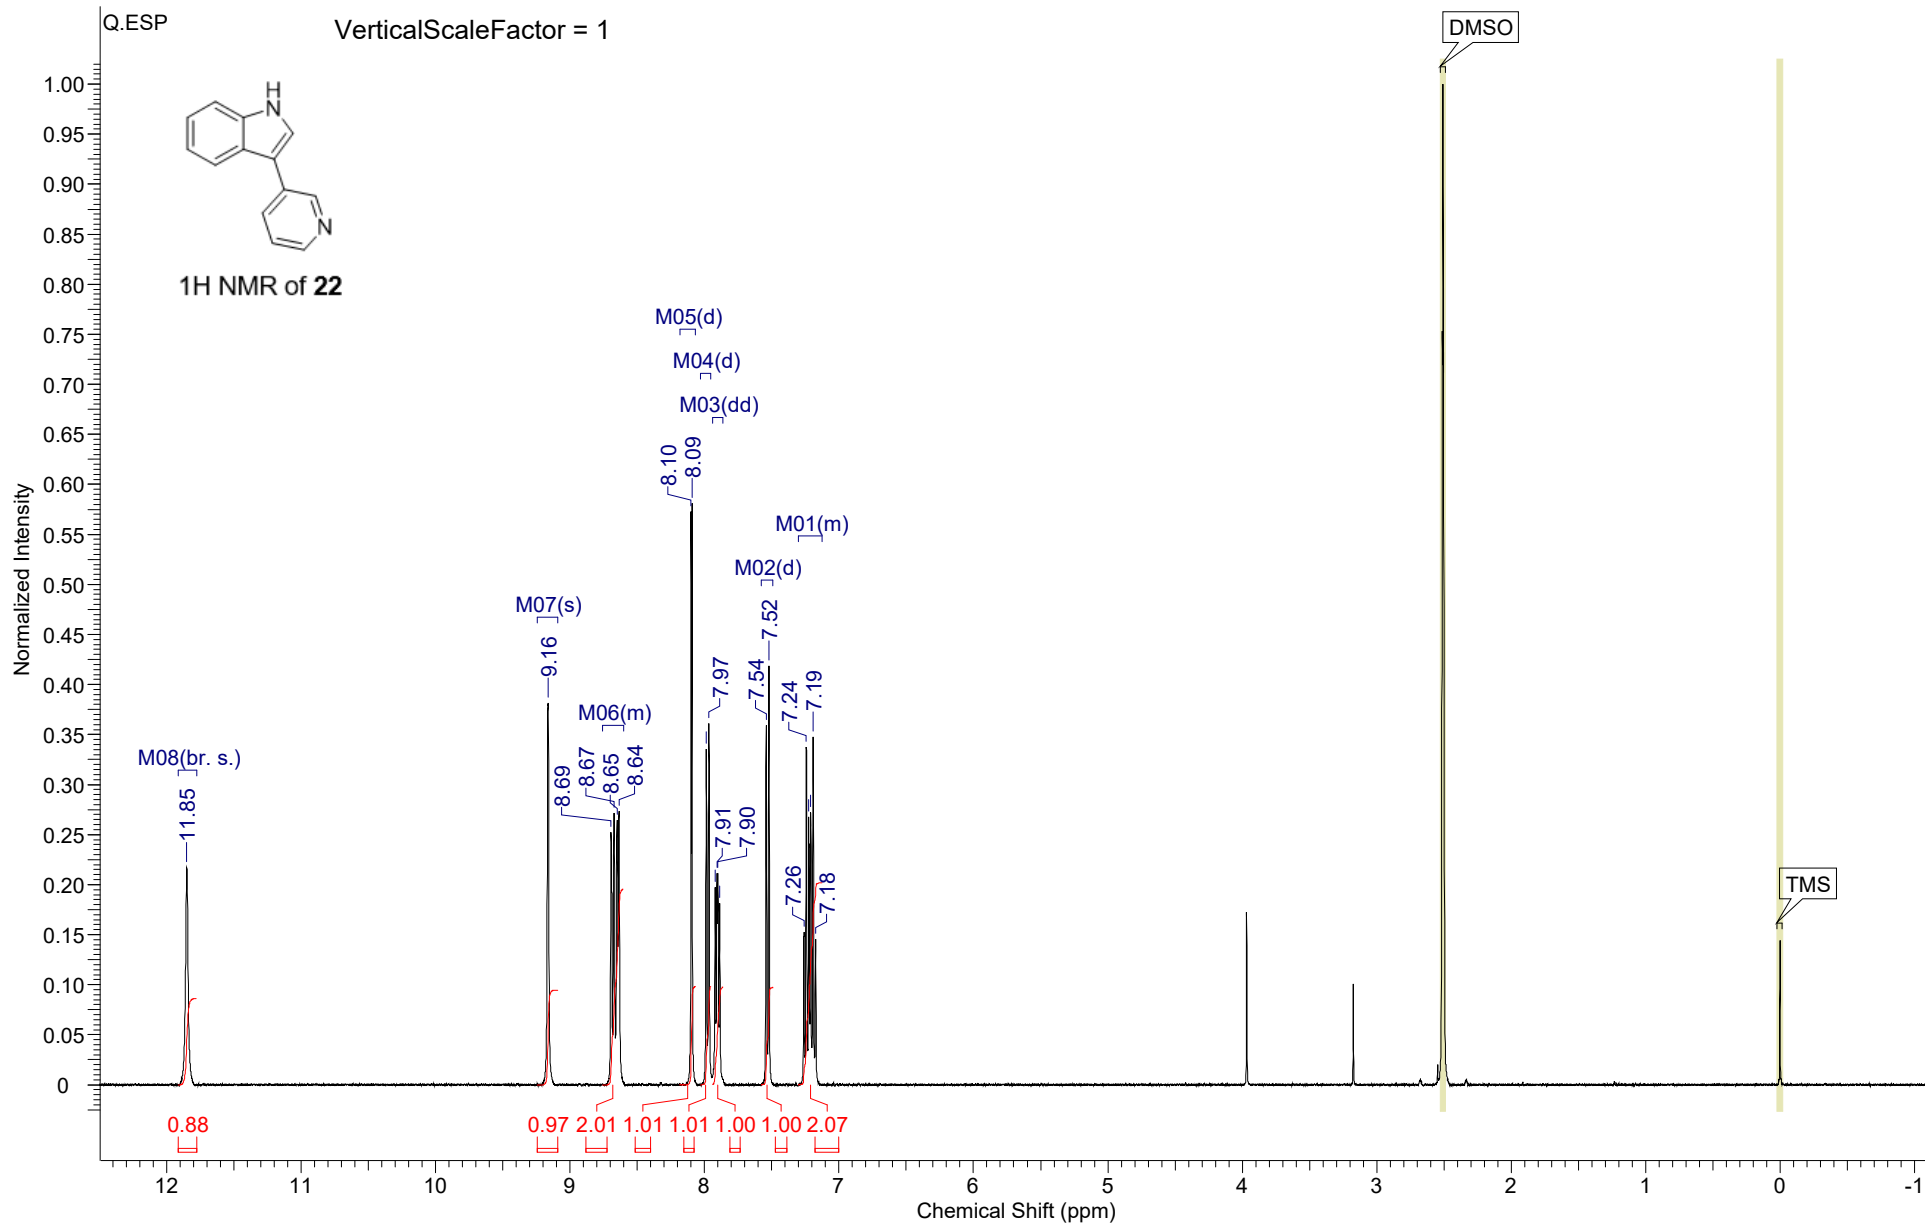



|                               |                             |                             |                      |                              |                      |
|-------------------------------|-----------------------------|-----------------------------|----------------------|------------------------------|----------------------|
| <b>Acquisition Time (sec)</b> | 1.3631                      | <b>Date</b>                 | 11 Aug 2017 00:55:44 | <b>Date Stamp</b>            | 11 Aug 2017 00:55:44 |
| <b>File Name</b>              | D:\CJO-UCSF\NMR\CJO-Q\2\fid | <b>Frequency (MHz)</b>      | 100.63               | <b>Nucleus</b>               | 13C                  |
| <b>Number of Transients</b>   | 3000                        | <b>Origin</b>               | spect                | <b>Original Points Count</b> | 32768                |
| <b>Points Count</b>           | 32768                       | <b>Pulse Sequence</b>       | zgpg30               | <b>Receiver Gain</b>         | 196.40               |
| <b>Solvent</b>                | DMSO-d6                     | <b>Spectrum Offset (Hz)</b> | 10061.7803           | <b>Spectrum Type</b>         | STANDARD             |
| <b>Temperature (degree C)</b> | 23.266                      |                             |                      | <b>SW(cyclical) (Hz)</b>     | 24038.46             |
|                               |                             |                             |                      | <b>Sweep Width (Hz)</b>      | 24037.73             |

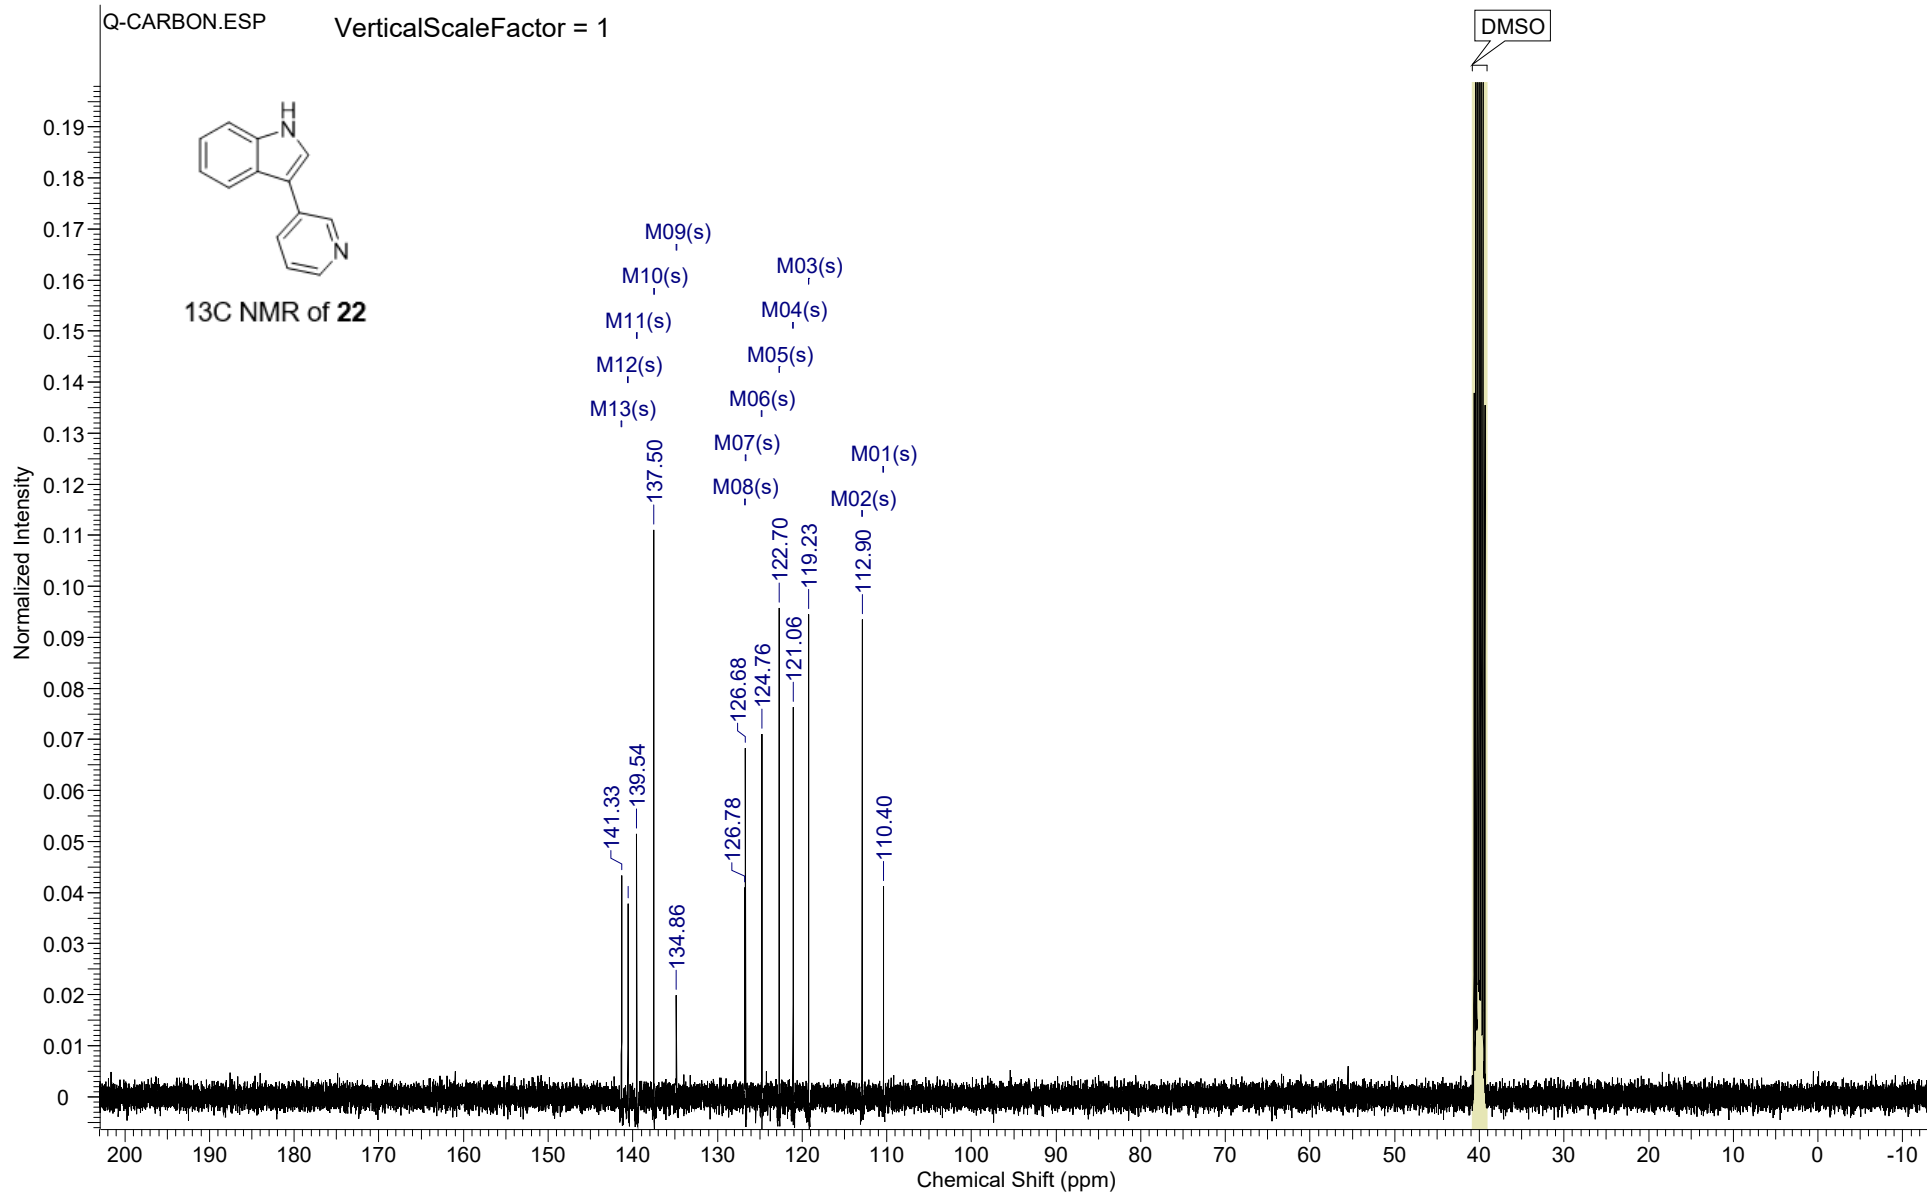

|                               |                                           |                             |                      |                              |                   |                          |         |
|-------------------------------|-------------------------------------------|-----------------------------|----------------------|------------------------------|-------------------|--------------------------|---------|
| <b>Acquisition Time (sec)</b> | 4.0894                                    | <b>Date</b>                 | 06 Sep 2017 09:34:08 |                              | <b>Date Stamp</b> | 06 Sep 2017 09:34:08     |         |
| <b>File Name</b>              | D:\CJO-UCSF\NMR\CJO-V1-Alex is cool\1\fid | <b>Frequency (MHz)</b>      | 400.15               | <b>Nucleus</b>               | 1H                |                          |         |
| <b>Number of Transients</b>   | 24                                        | <b>Origin</b>               | spect                | <b>Original Points Count</b> | 32768             | <b>Owner</b>             | IND-NMR |
| <b>Points Count</b>           | 32768                                     | <b>Pulse Sequence</b>       | zg30                 | <b>Receiver Gain</b>         | 30.74             | <b>SW(cyclical) (Hz)</b> | 8012.82 |
| <b>Solvent</b>                | DMSO-d6                                   | <b>Spectrum Offset (Hz)</b> | 2470.9260            | <b>Spectrum Type</b>         | STANDARD          | <b>Sweep Width (Hz)</b>  | 8012.58 |
| <b>Temperature (degree C)</b> | 22.400                                    |                             |                      |                              |                   |                          |         |

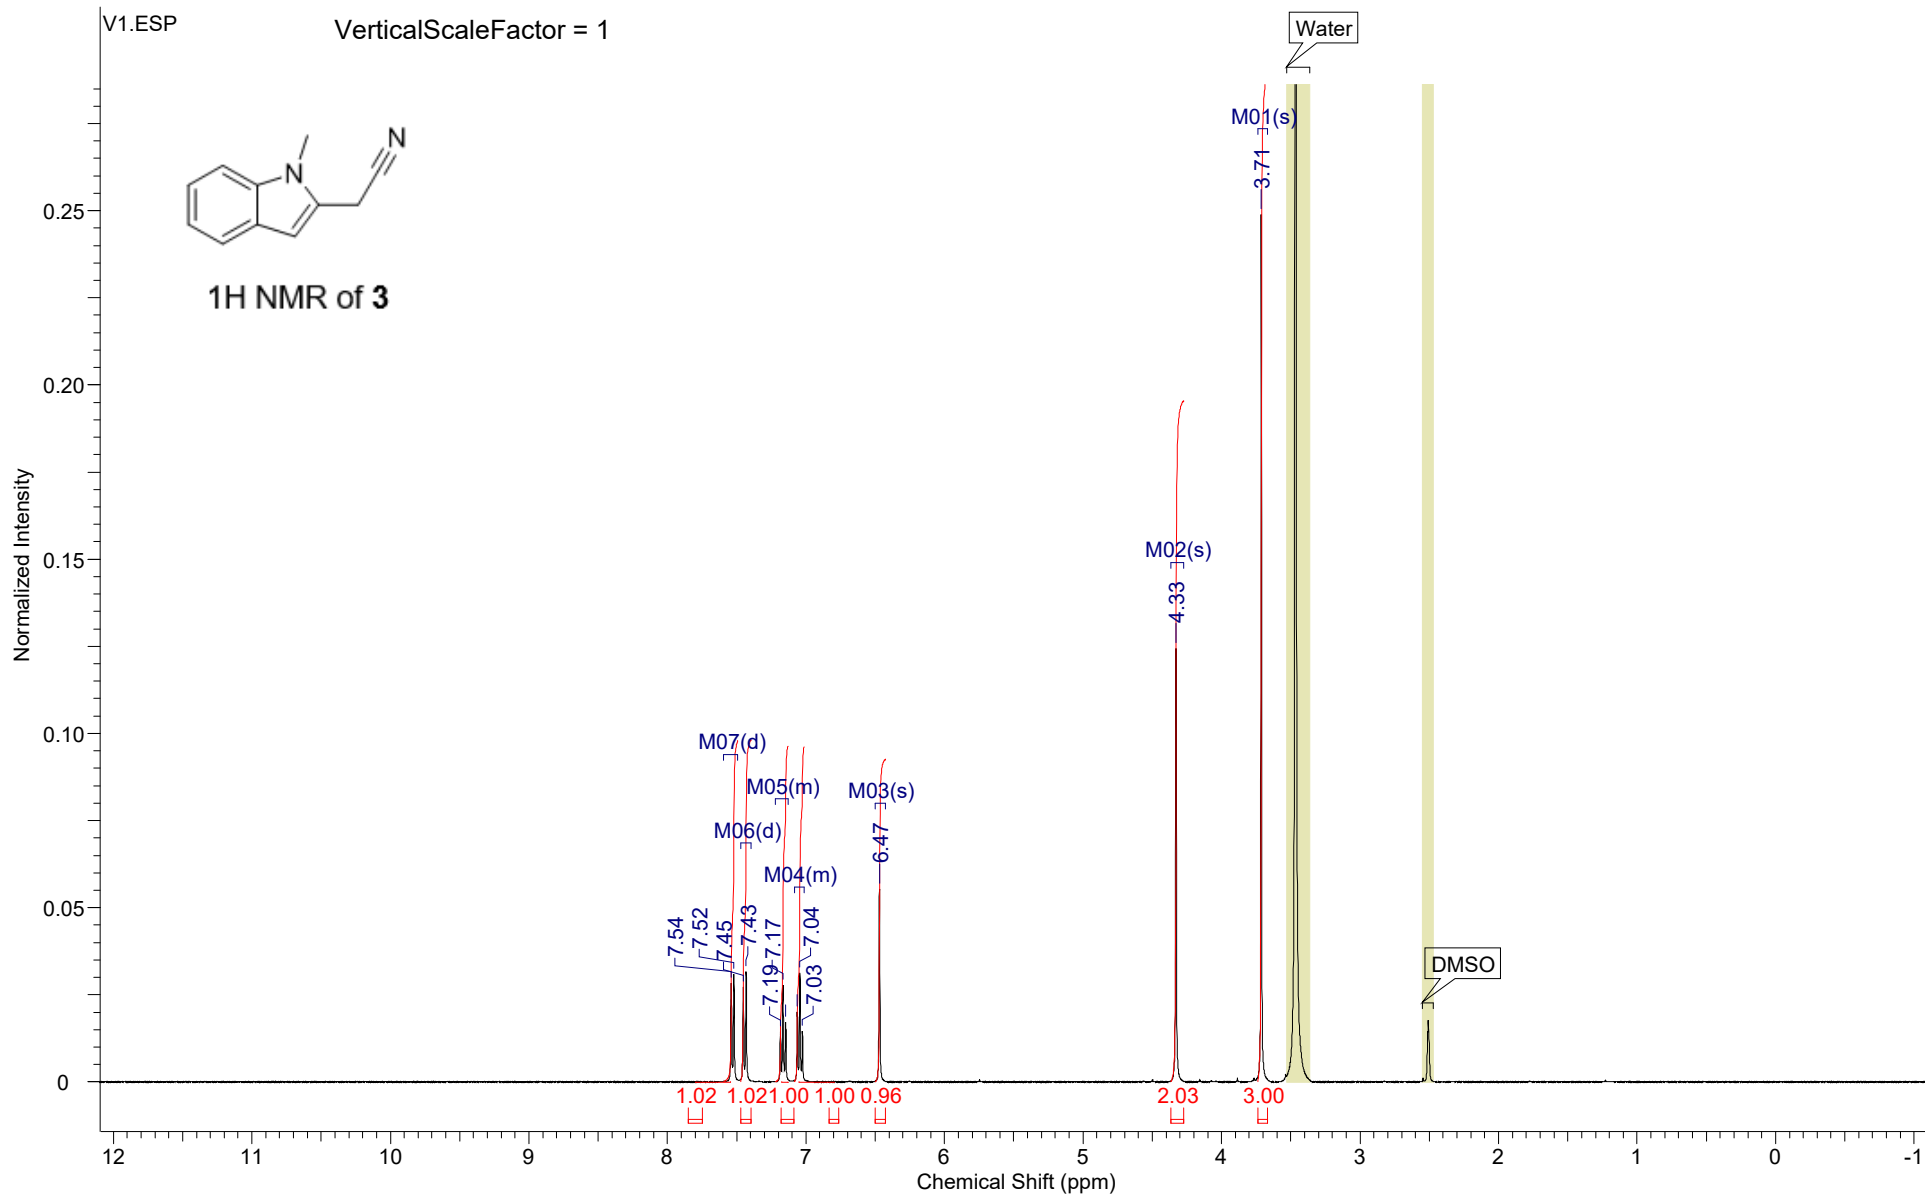

|                               |                                                |                             |                      |                              |                      |
|-------------------------------|------------------------------------------------|-----------------------------|----------------------|------------------------------|----------------------|
| <b>Acquisition Time (sec)</b> | 1.3631                                         | <b>Date</b>                 | 07 Sep 2017 23:56:00 | <b>Date Stamp</b>            | 07 Sep 2017 23:56:00 |
| <b>File Name</b>              | D:\CJO-UCSF\NMR\CJO-V1-Alex is cool\CARBON\fid | <b>Frequency (MHz)</b>      | 100.63               | <b>Nucleus</b>               | 13C                  |
| <b>Number of Transients</b>   | 2000                                           | <b>Origin</b>               | spect                | <b>Original Points Count</b> | 32768                |
| <b>Points Count</b>           | 32768                                          | <b>Pulse Sequence</b>       | zpgg30               | <b>Receiver Gain</b>         | 196.40               |
| <b>Solvent</b>                | DMSO-d6                                        | <b>Spectrum Offset (Hz)</b> | 10061.7803           | <b>Spectrum Type</b>         | STANDARD             |
| <b>Temperature (degree C)</b> | 23.417                                         |                             |                      | <b>SW(cyclical) (Hz)</b>     | 24038.46             |
|                               |                                                |                             |                      | <b>Sweep Width (Hz)</b>      | 24037.73             |

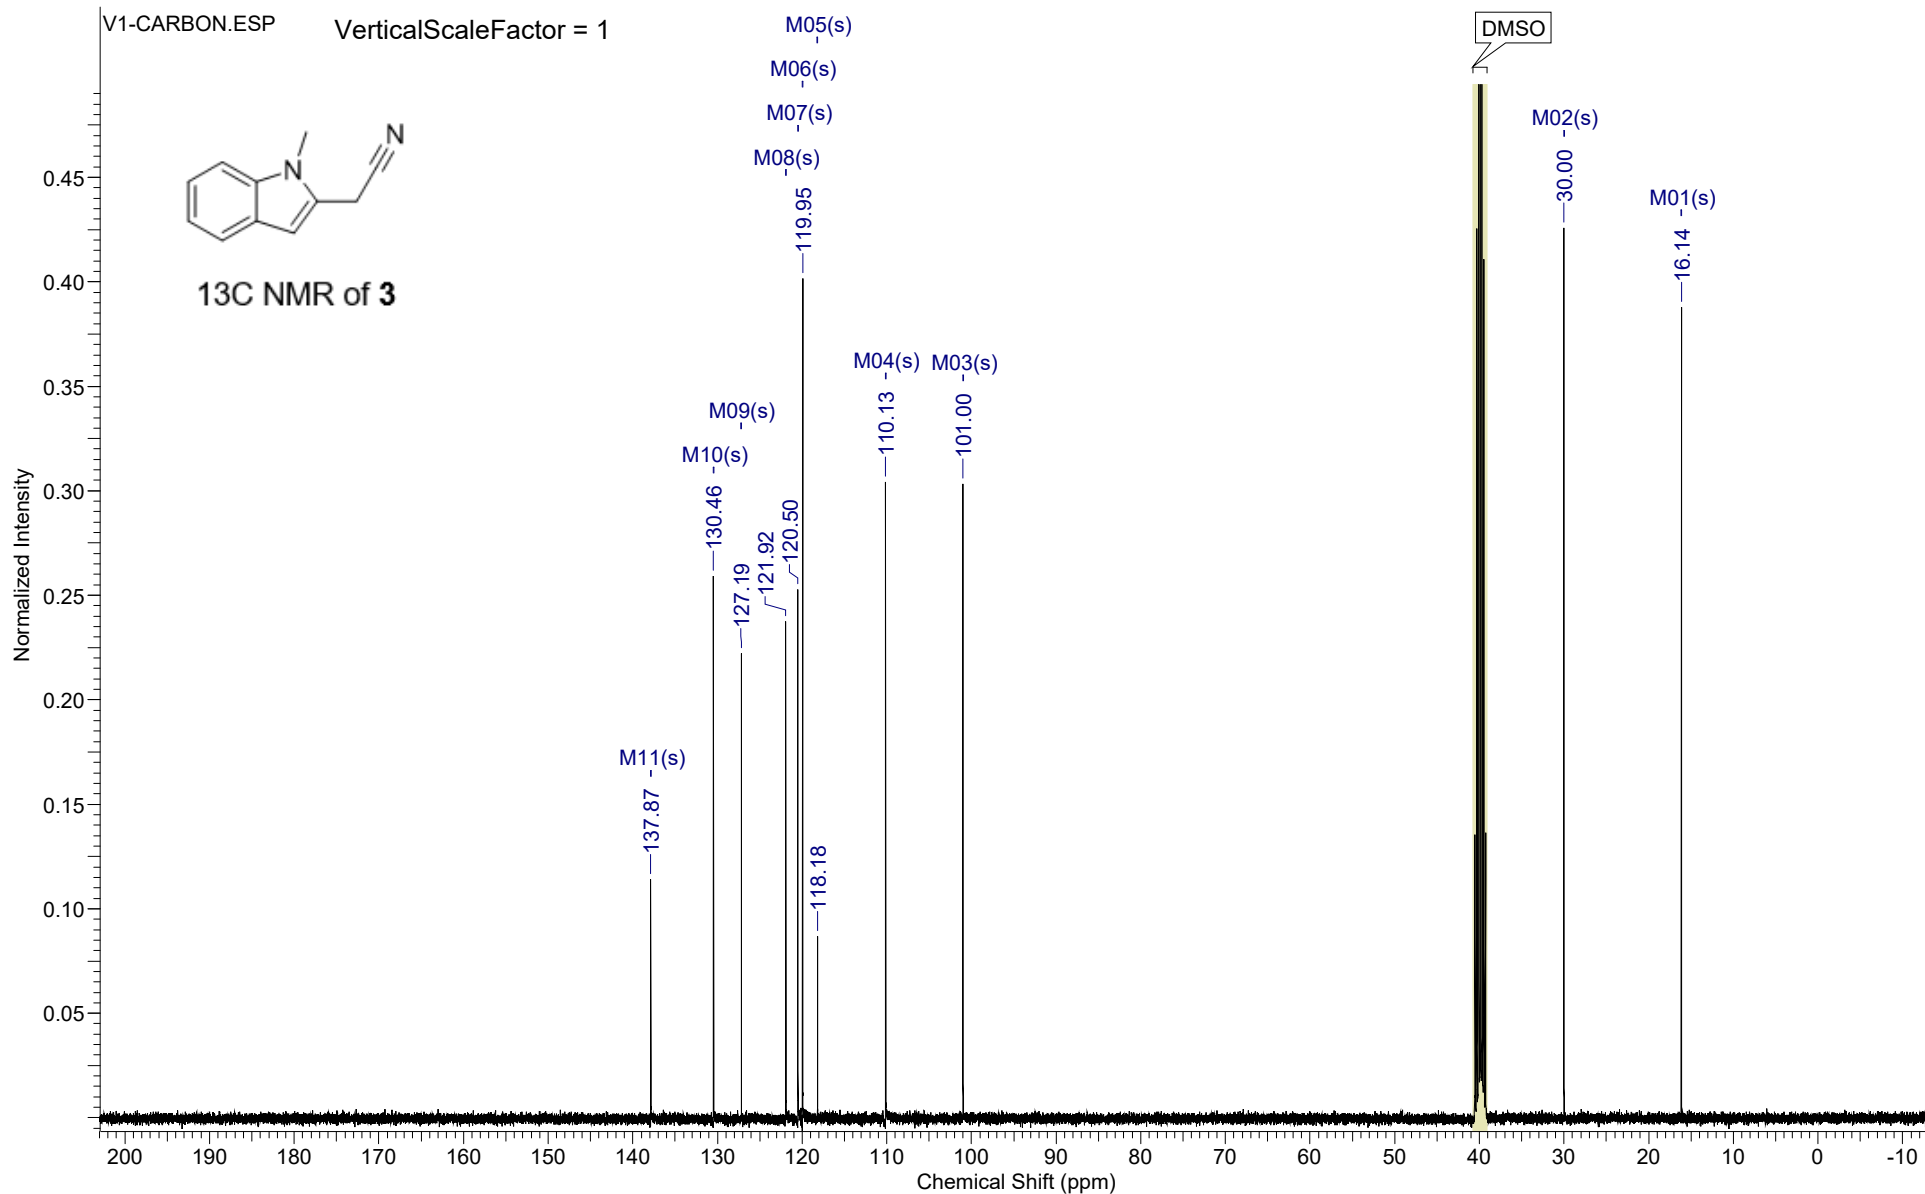

|                        |                              |                        |                      |                      |                      |
|------------------------|------------------------------|------------------------|----------------------|----------------------|----------------------|
| Acquisition Time (sec) | 4.0894                       | Date                   | 29 Aug 2017 08:21:36 | Date Stamp           | 29 Aug 2017 08:21:36 |
| File Name              | D:\CJO-UCSF\NMR\CJO-T1\1\fid | Frequency (MHz)        | 400.15               | Nucleus              | <sup>1</sup> H       |
| Origin                 | spect                        | Original Points Count  | 32768                | Owner                | IND-NMR              |
| Receiver Gain          | 141.25                       | SW(cyclical) (Hz)      | 8012.82              | Points Count         | 32768                |
| Sweep Width (Hz)       | 8012.58                      | Temperature (degree C) | 22.792               | Solvent              | DMSO-d6              |
|                        |                              |                        |                      | Spectrum Offset (Hz) | 2470.9260            |
|                        |                              |                        |                      | Spectrum Type        | STANDARD             |

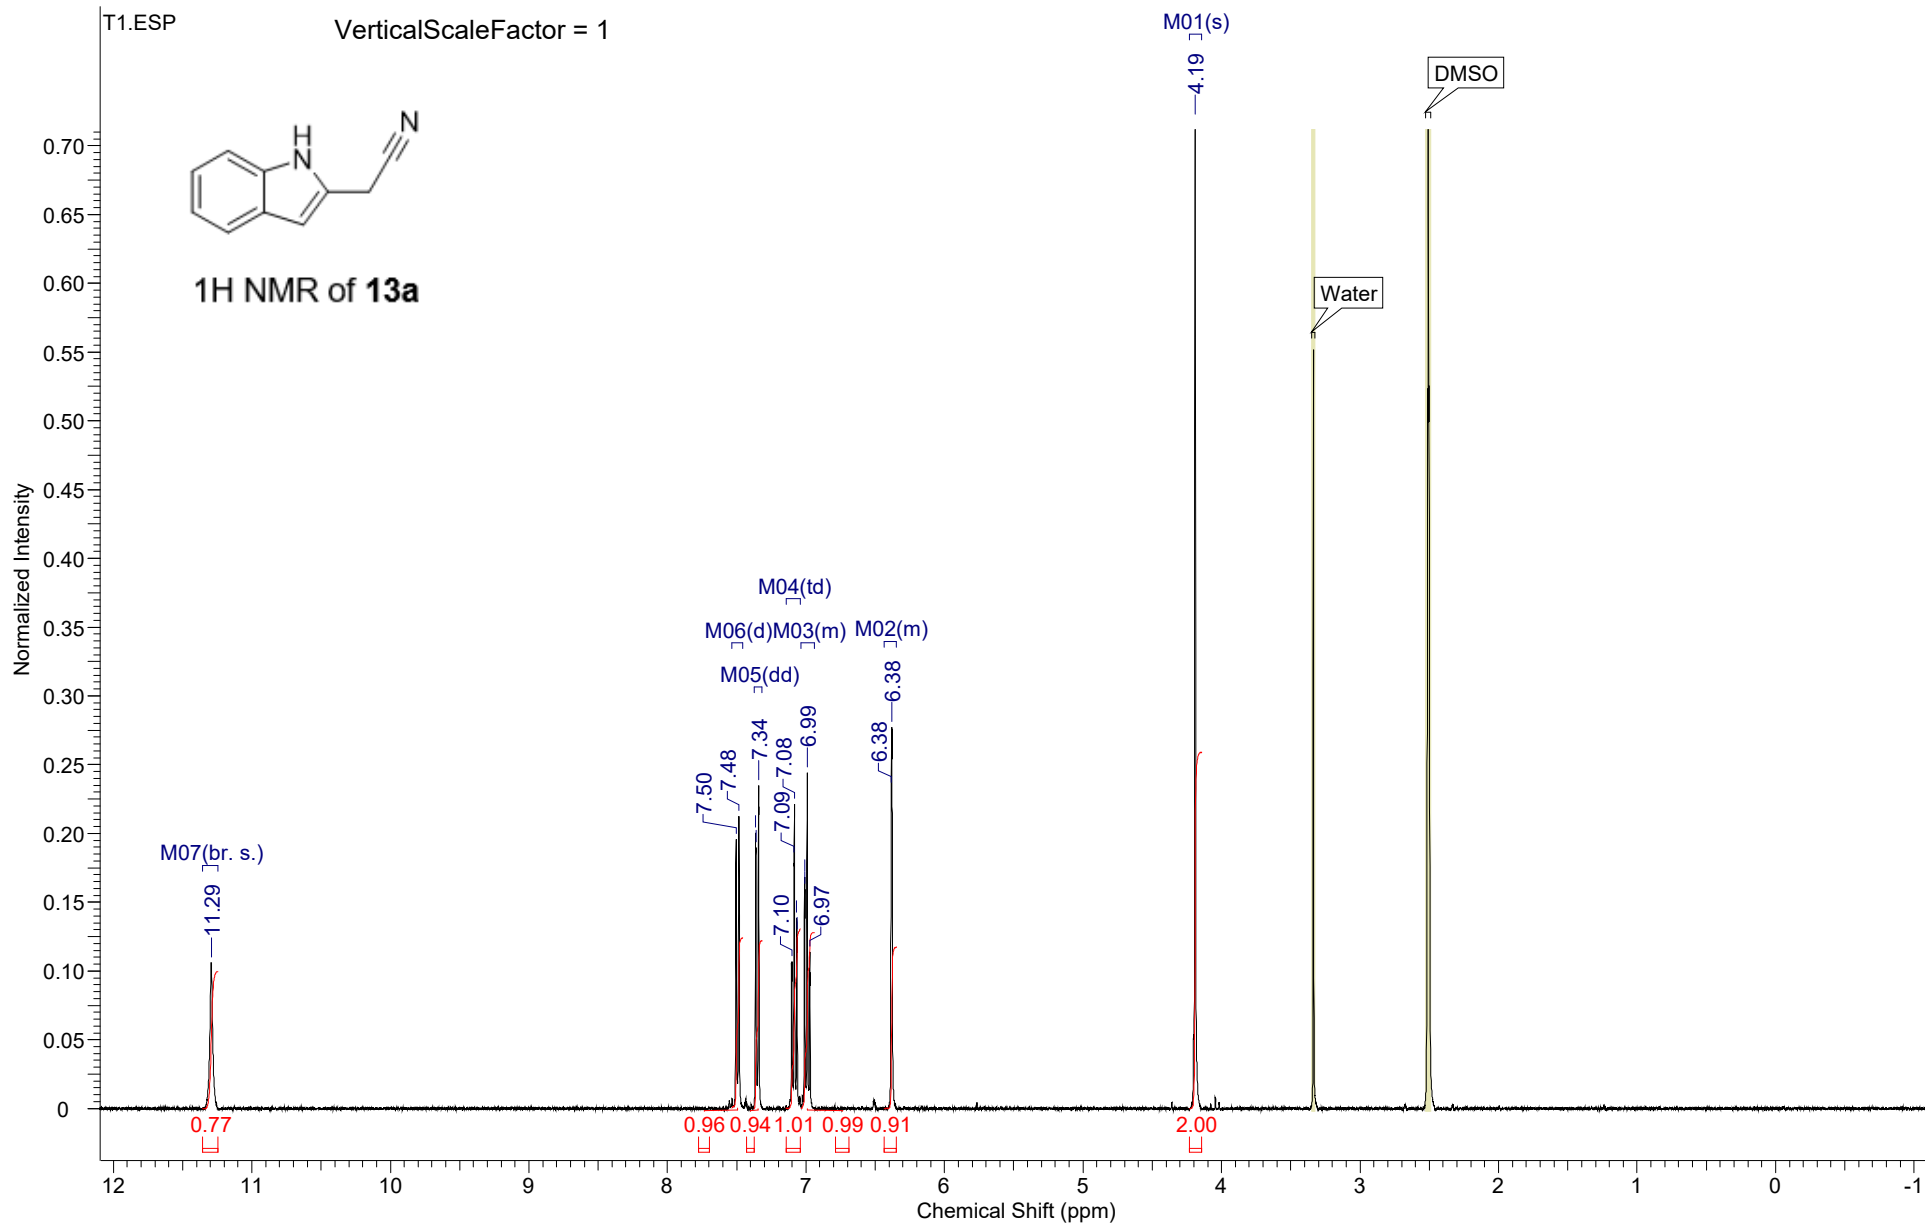

|                               |                                   |                             |                      |                              |                      |
|-------------------------------|-----------------------------------|-----------------------------|----------------------|------------------------------|----------------------|
| <b>Acquisition Time (sec)</b> | 1.3631                            | <b>Date</b>                 | 30 Aug 2017 01:55:28 | <b>Date Stamp</b>            | 30 Aug 2017 01:55:28 |
| <b>File Name</b>              | D:\CJO-UCSF\NMR\CJO-T1\CARBON\fid | <b>Frequency (MHz)</b>      | 100.63               | <b>Nucleus</b>               | <sup>13</sup> C      |
| <b>Number of Transients</b>   | 2000                              | <b>Origin</b>               | spect                | <b>Original Points Count</b> | 32768                |
| <b>Points Count</b>           | 32768                             | <b>Pulse Sequence</b>       | zgpg30               | <b>Receiver Gain</b>         | 196.40               |
| <b>Solvent</b>                | DMSO-d6                           | <b>Spectrum Offset (Hz)</b> | 10061.7803           | <b>Spectrum Type</b>         | STANDARD             |
| <b>Temperature (degree C)</b> | 23.051                            |                             |                      | <b>SW(cyclical) (Hz)</b>     | 24038.46             |
|                               |                                   |                             |                      | <b>Sweep Width (Hz)</b>      | 24037.73             |

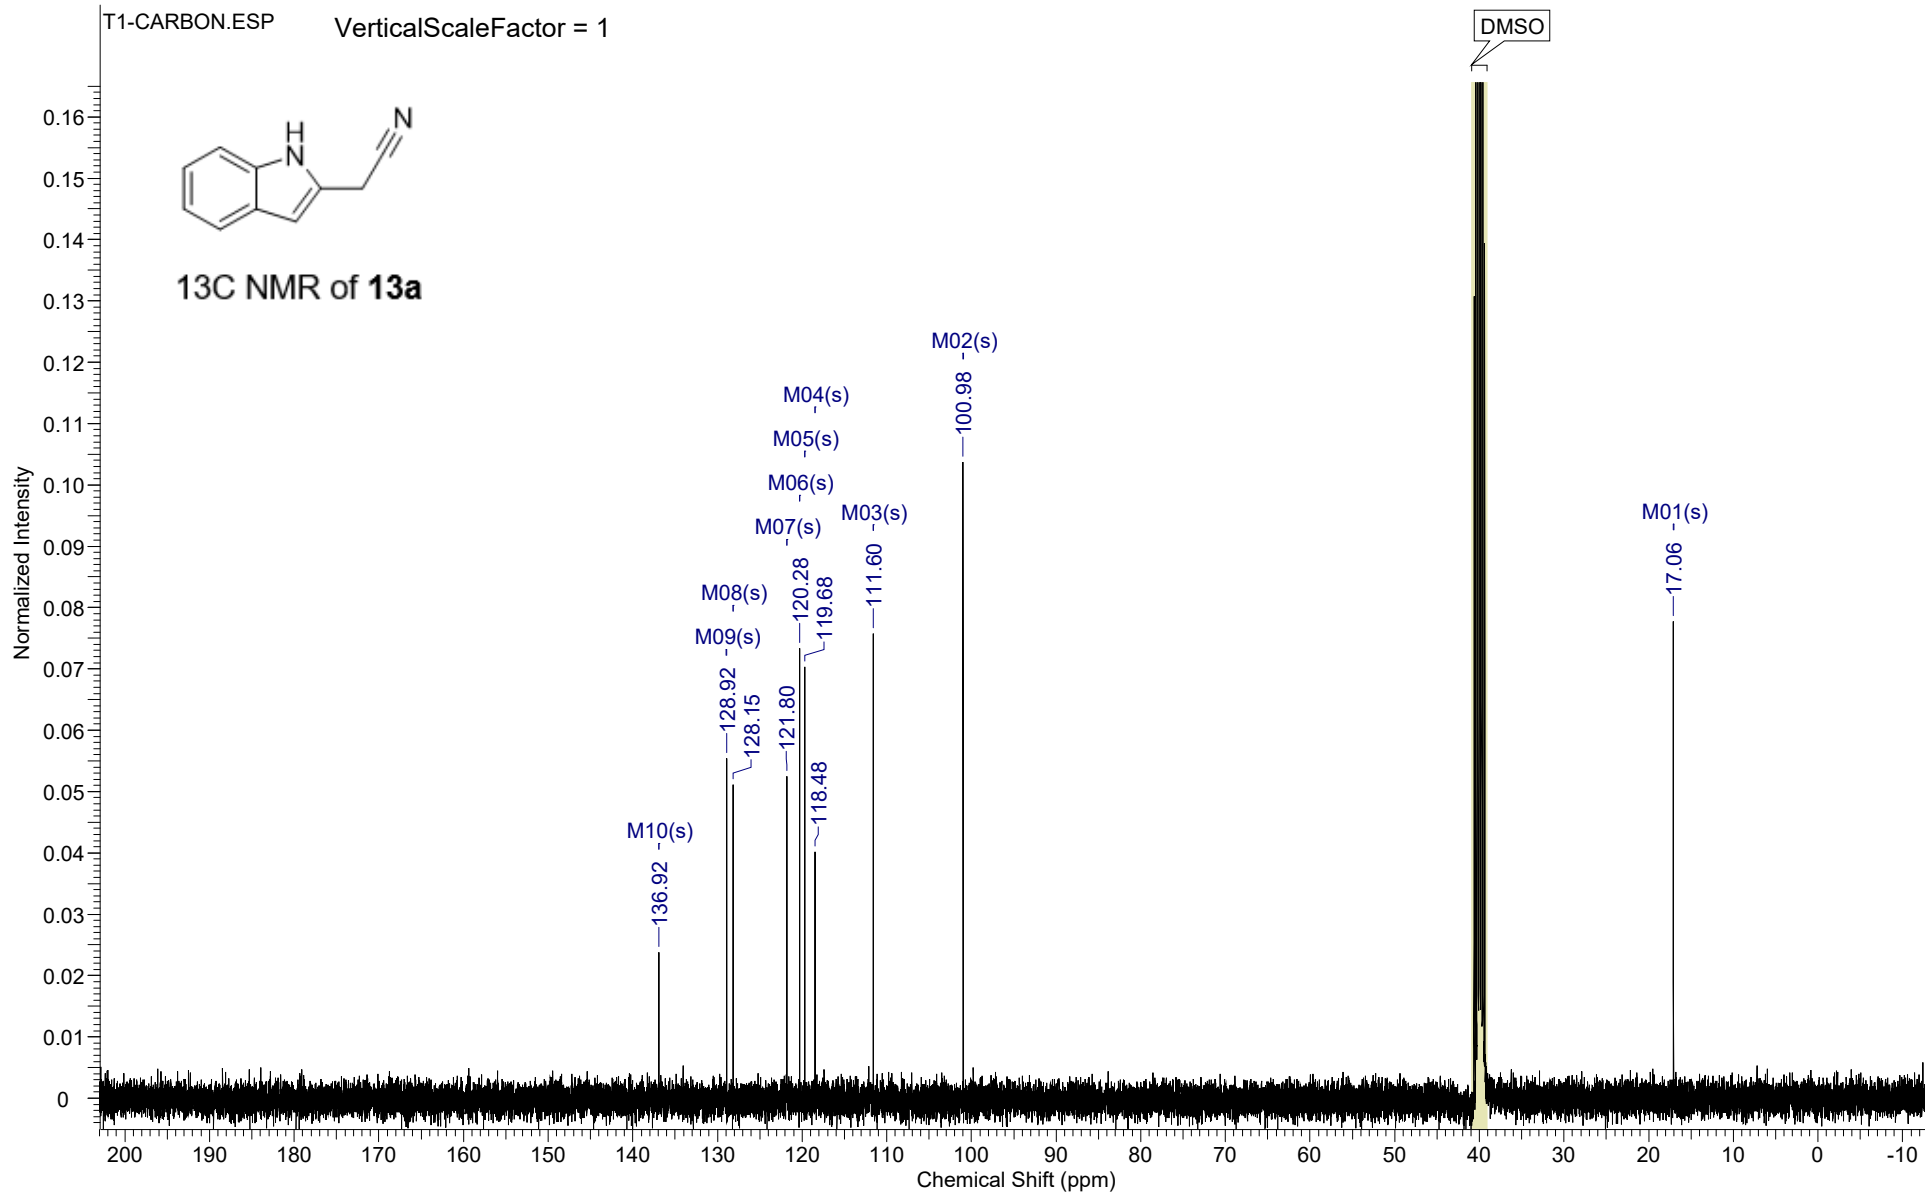

|                        |                              |                        |                      |                      |                      |
|------------------------|------------------------------|------------------------|----------------------|----------------------|----------------------|
| Acquisition Time (sec) | 4.0894                       | Date                   | 29 Aug 2017 08:17:20 | Date Stamp           | 29 Aug 2017 08:17:20 |
| File Name              | D:\CJO-UCSF\NMR\CJO-S1\1\fid | Frequency (MHz)        | 400.15               | Nucleus              | <sup>1</sup> H       |
| Origin                 | spect                        | Original Points Count  | 32768                | Owner                | IND-NMR              |
| Receiver Gain          | 125.72                       | SW(cyclical) (Hz)      | 8012.82              | Points Count         | 32768                |
| Sweep Width (Hz)       | 8012.58                      | Temperature (degree C) | 22.782               | Solvent              | DMSO-d6              |
|                        |                              |                        |                      | Spectrum Offset (Hz) | 2470.9260            |
|                        |                              |                        |                      | Spectrum Type        | STANDARD             |

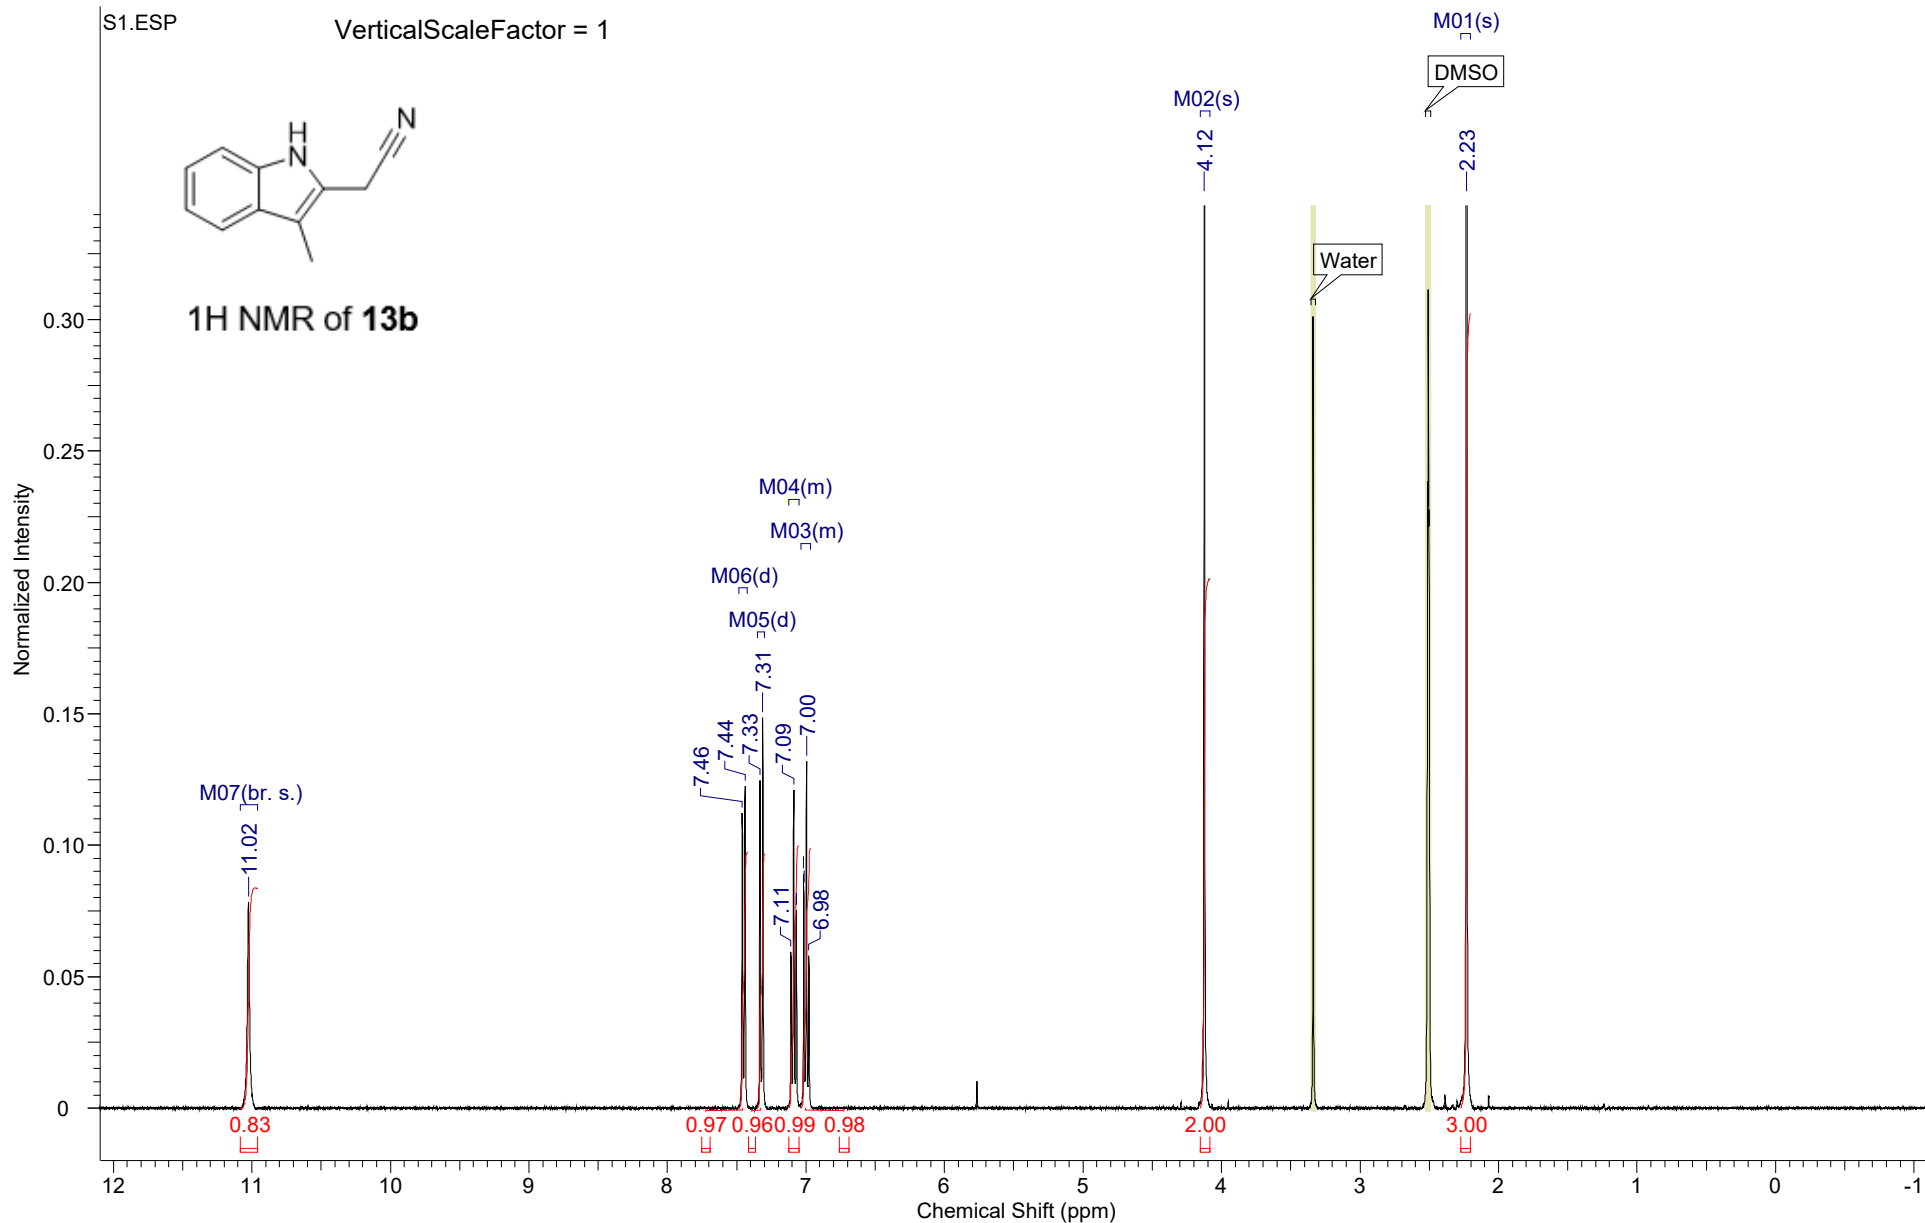

|                        |                                   |                      |                      |                       |                      |
|------------------------|-----------------------------------|----------------------|----------------------|-----------------------|----------------------|
| Acquisition Time (sec) | 1.3631                            | Date                 | 30 Aug 2017 00:00:16 | Date Stamp            | 30 Aug 2017 00:00:16 |
| File Name              | D:\CJO-UCSF\NMR\CJO-S1\CARBON\fid | Frequency (MHz)      | 100.63               | Nucleus               | <sup>13</sup> C      |
| Number of Transients   | 2000                              | Origin               | spect                | Original Points Count | 32768                |
| Points Count           | 32768                             | Pulse Sequence       | zgpg30               | Receiver Gain         | 196.40               |
| Solvent                | DMSO-d6                           | Spectrum Offset (Hz) | 10061.7803           | Spectrum Type         | STANDARD             |
| Temperature (degree C) | 23.154                            |                      |                      | Sweep Width (Hz)      | 24037.73             |

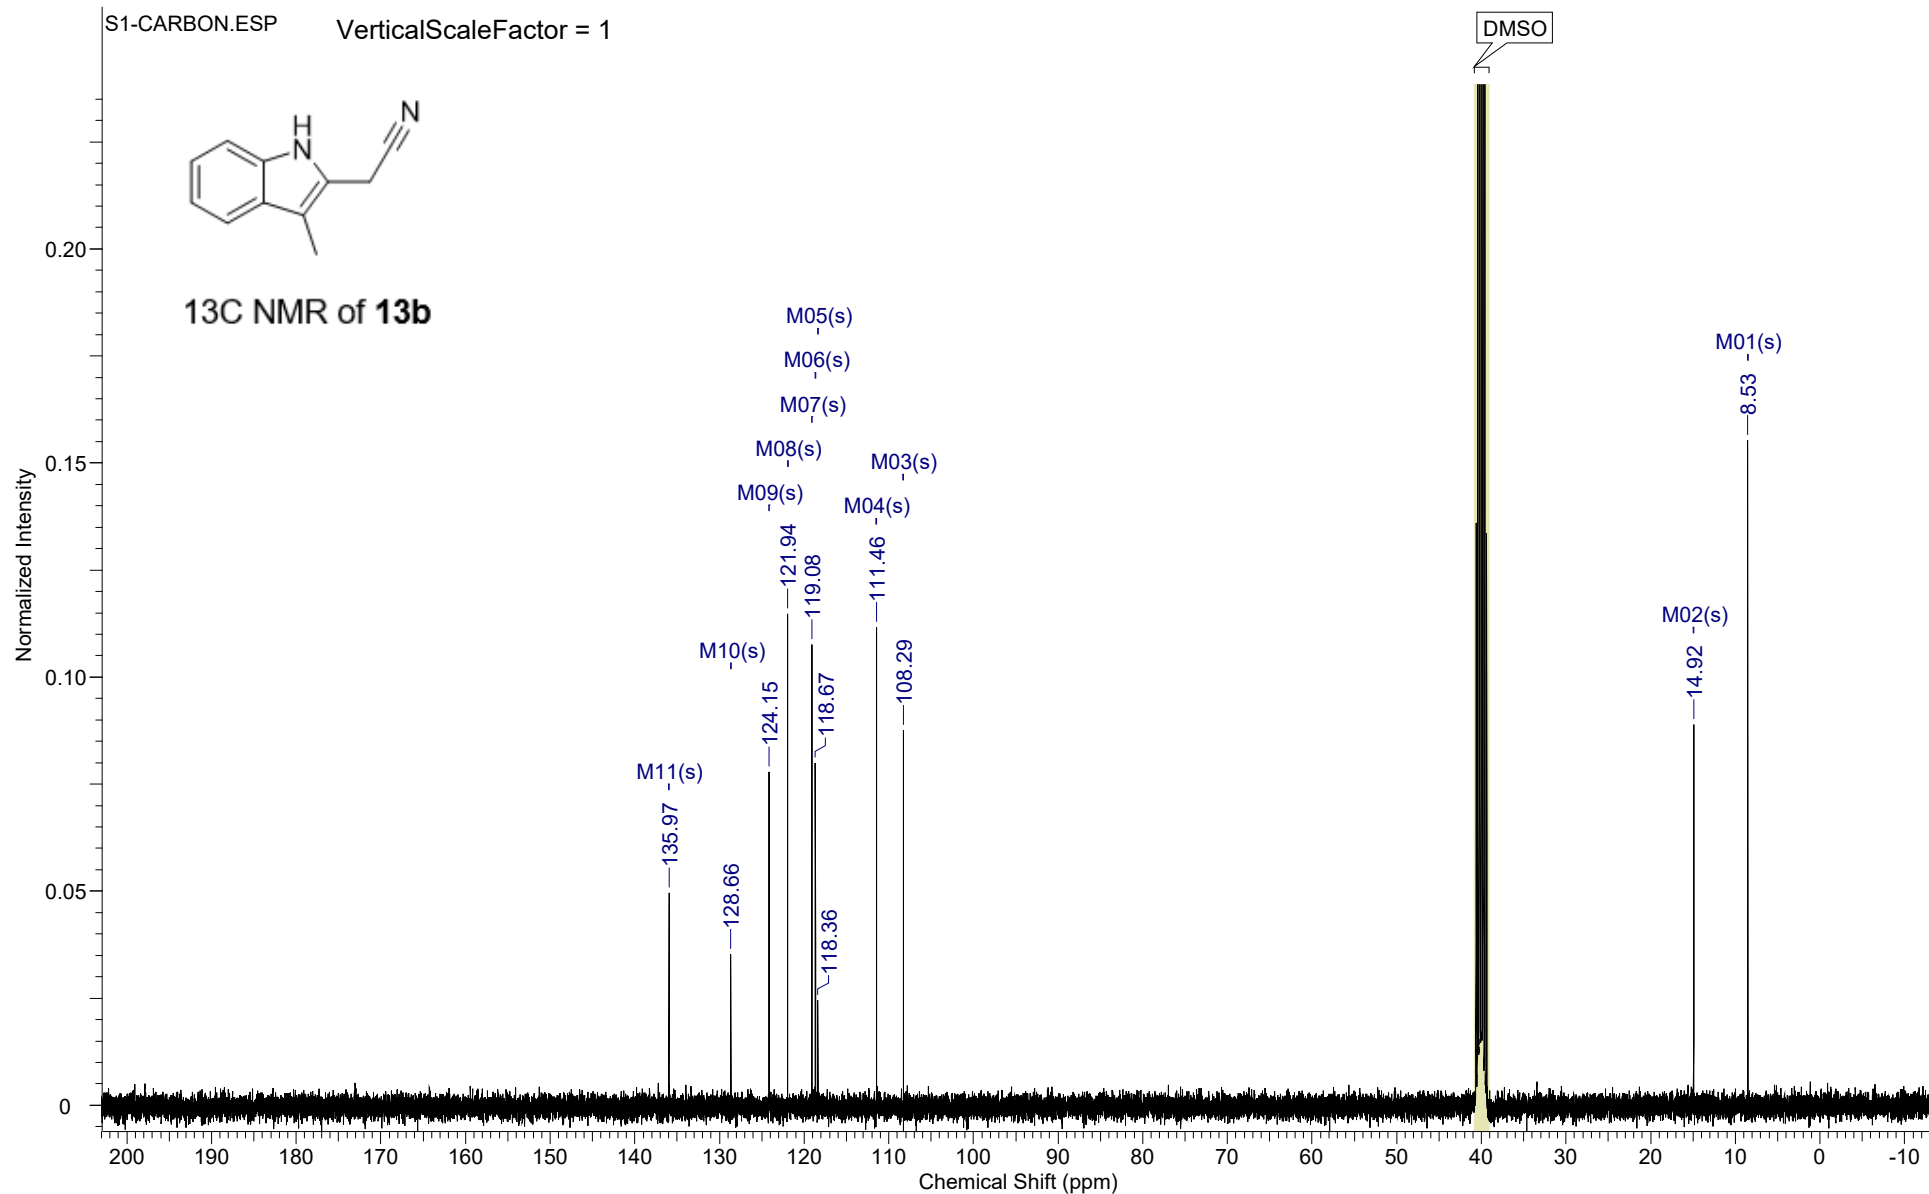

|                               |                         |                               |                        |                   |                      |                             |                             |                       |          |
|-------------------------------|-------------------------|-------------------------------|------------------------|-------------------|----------------------|-----------------------------|-----------------------------|-----------------------|----------|
| <b>Acquisition Time (sec)</b> | 4.0894                  | <b>Date</b>                   | 03 Aug 2017 10:36:00   | <b>Date Stamp</b> | 03 Aug 2017 10:36:00 |                             |                             |                       |          |
| <b>File Name</b>              | D:\NMR\CJO\CJO-A1\2\fid |                               | <b>Frequency (MHz)</b> | 400.15            | <b>Nucleus</b>       | 1H                          | <b>Number of Transients</b> | 32                    |          |
| <b>Origin</b>                 | spect                   | <b>Original Points Count</b>  | 32768                  | <b>Owner</b>      | IND-NMR              | <b>Points Count</b>         | 32768                       | <b>Pulse Sequence</b> | zg30     |
| <b>Receiver Gain</b>          | 97.12                   | <b>SW(cyclical) (Hz)</b>      | 8012.82                | <b>Solvent</b>    | DMSO-d6              | <b>Spectrum Offset (Hz)</b> | 2470.9260                   | <b>Spectrum Type</b>  | STANDARD |
| <b>Sweep Width (Hz)</b>       | 8012.58                 | <b>Temperature (degree C)</b> | 22.616                 |                   |                      |                             |                             |                       |          |

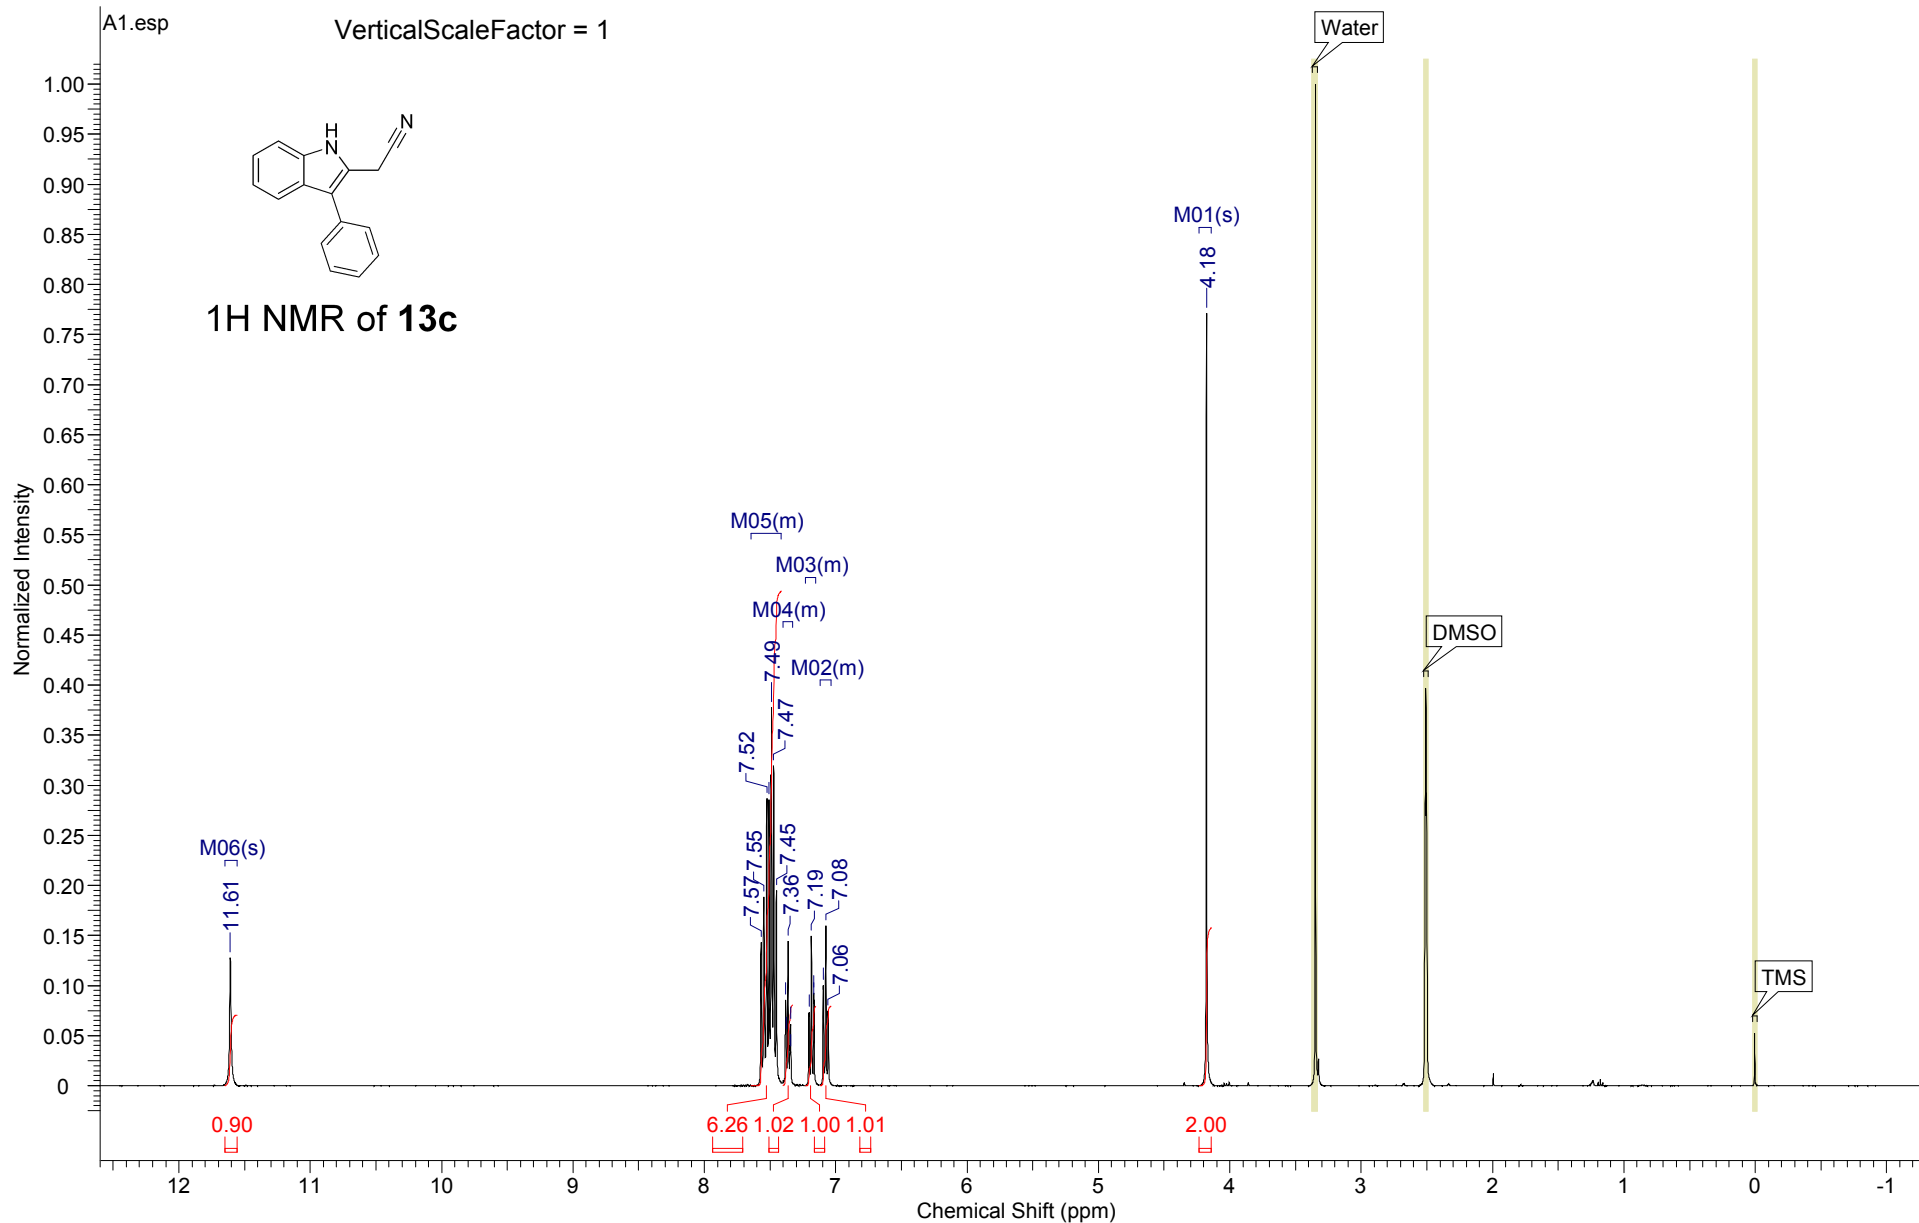



|                        |                              |                      |                      |                       |                      |
|------------------------|------------------------------|----------------------|----------------------|-----------------------|----------------------|
| Acquisition Time (sec) | 1.3631                       | Date                 | 04 Aug 2017 00:55:44 | Date Stamp            | 04 Aug 2017 00:55:44 |
| File Name              | D:\NMR\CJO\CJO-A1\CARBON\fid | Frequency (MHz)      | 100.63               | Nucleus               | <sup>13</sup> C      |
| Number of Transients   | 3000                         | Origin               | spect                | Original Points Count | 32768                |
| Points Count           | 32768                        | Pulse Sequence       | zgpg30               | Receiver Gain         | 196.40               |
| Solvent                | DMSO-d6                      | Spectrum Offset (Hz) | 10061.7803           | Spectrum Type         | STANDARD             |
| Temperature (degree C) | 23.584                       | SW(cyclical) (Hz)    |                      | Sweep Width (Hz)      | 24037.73             |

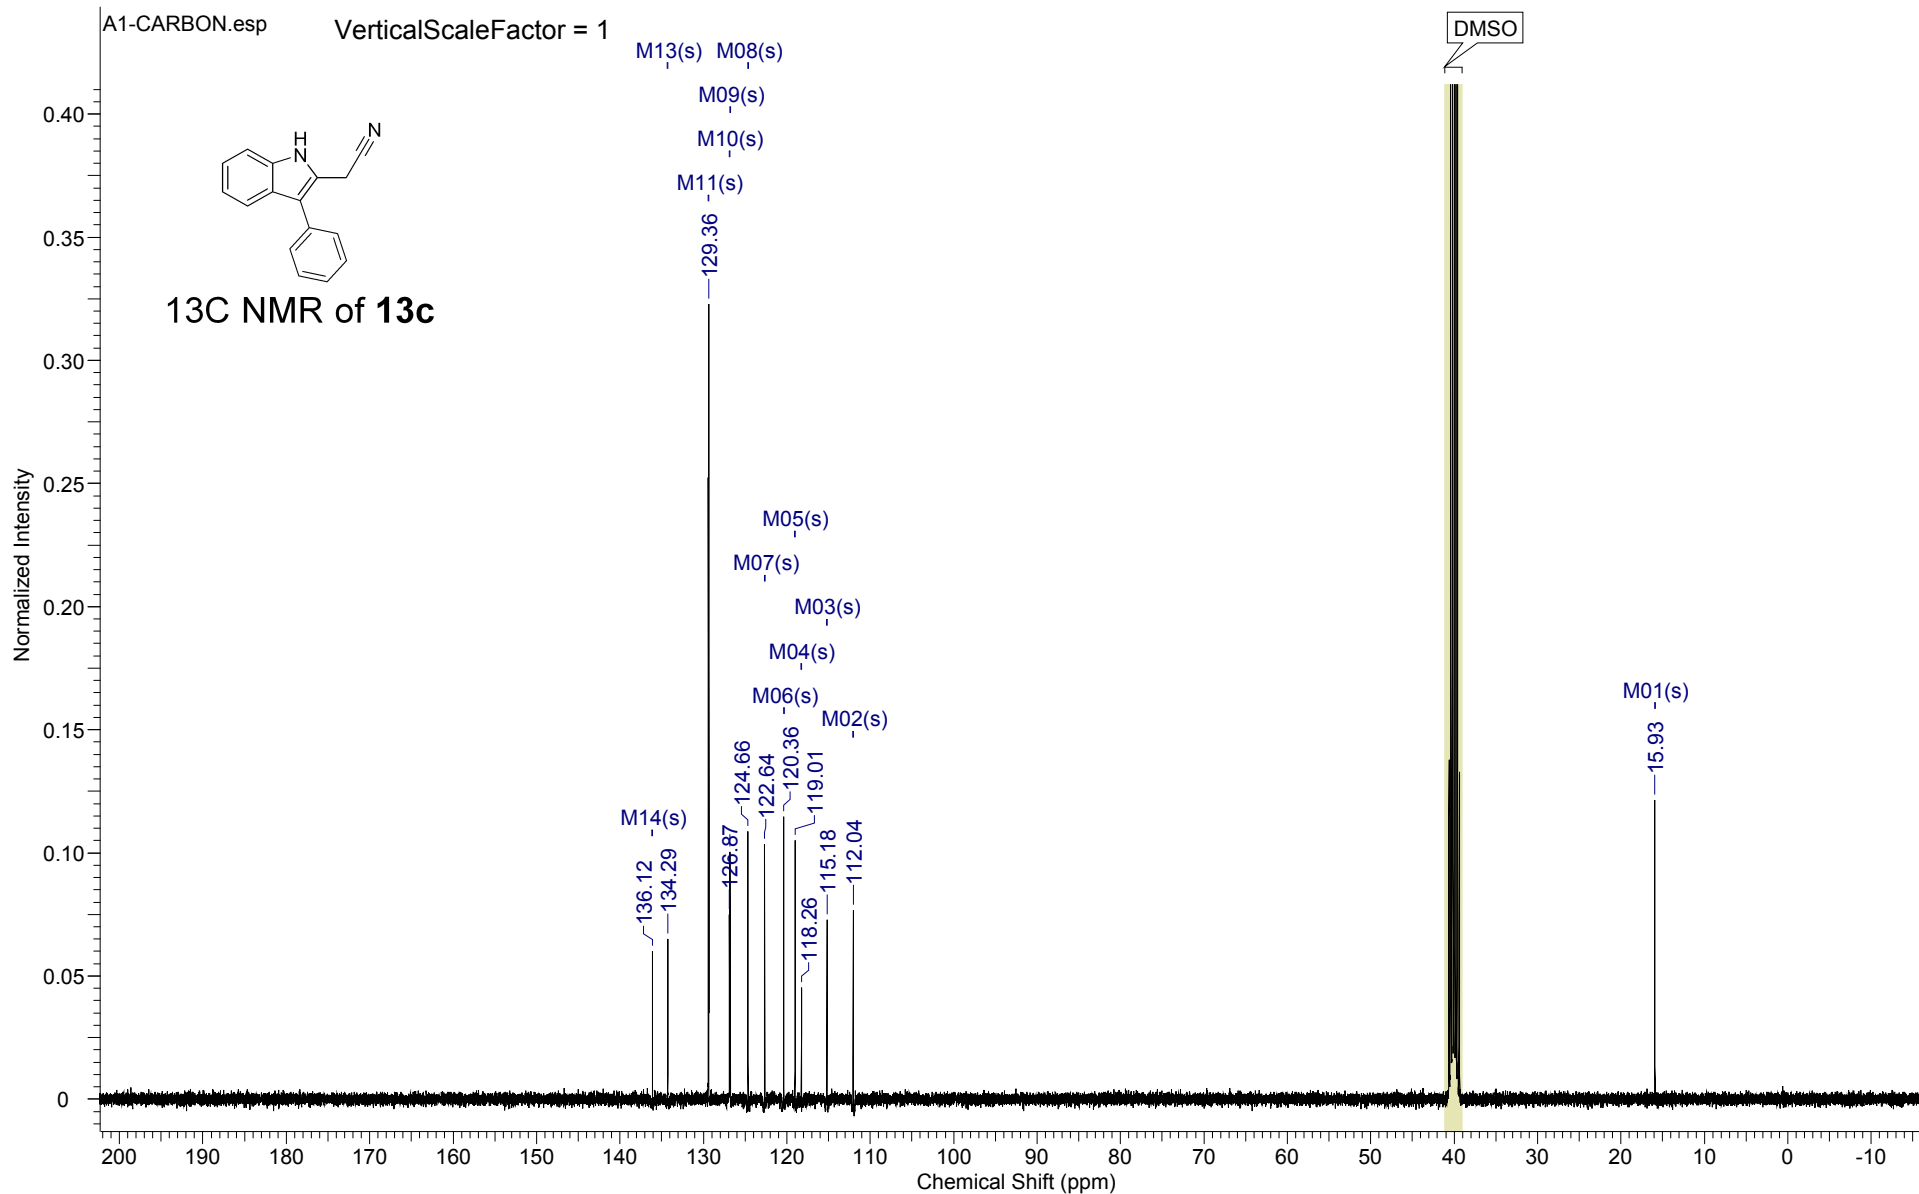

1H NOSEY NMR spectrum of 13c, in DMSO-d6

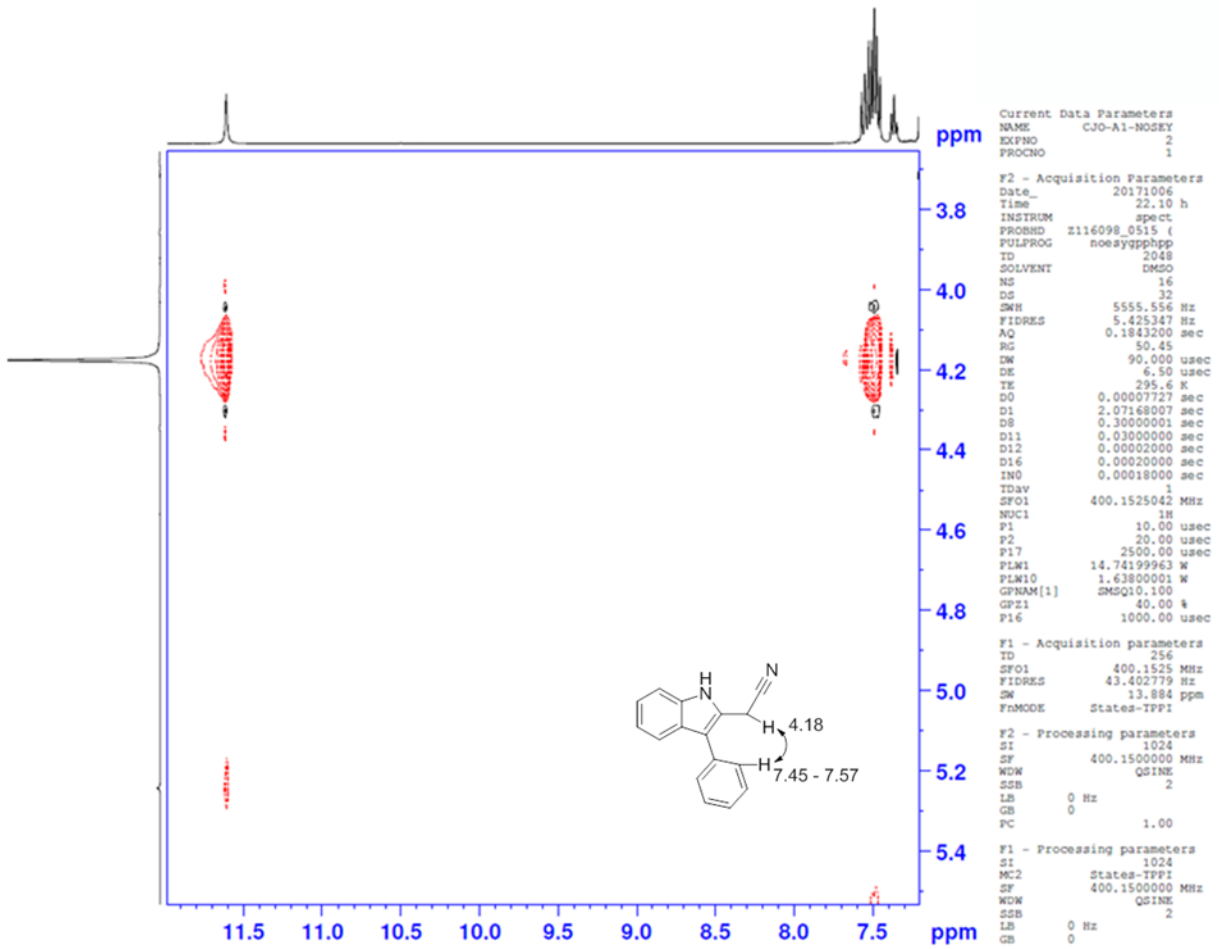

|                               |                         |                               |                      |                             |                      |
|-------------------------------|-------------------------|-------------------------------|----------------------|-----------------------------|----------------------|
| <b>Acquisition Time (sec)</b> | 4.0894                  | <b>Date</b>                   | 28 Jul 2017 11:10:08 | <b>Date Stamp</b>           | 28 Jul 2017 11:10:08 |
| <b>File Name</b>              | D:\NMR\CJO\CJO-N1\1\fid | <b>Frequency (MHz)</b>        | 400.15               | <b>Nucleus</b>              | <sup>1</sup> H       |
| <b>Origin</b>                 | spect                   | <b>Original Points Count</b>  | 32768                | <b>Owner</b>                | IND-NMR              |
| <b>Receiver Gain</b>          | 125.72                  | <b>SW(cyclical) (Hz)</b>      | 8012.82              | <b>Points Count</b>         | 32768                |
| <b>Sweep Width (Hz)</b>       | 8012.58                 | <b>Solvent</b>                | DMSO-d6              | <b>Spectrum Offset (Hz)</b> | 2470.9260            |
|                               |                         | <b>Temperature (degree C)</b> | 22.575               | <b>Pulse Sequence</b>       | zg30                 |
|                               |                         |                               |                      | <b>Spectrum Type</b>        | STANDARD             |

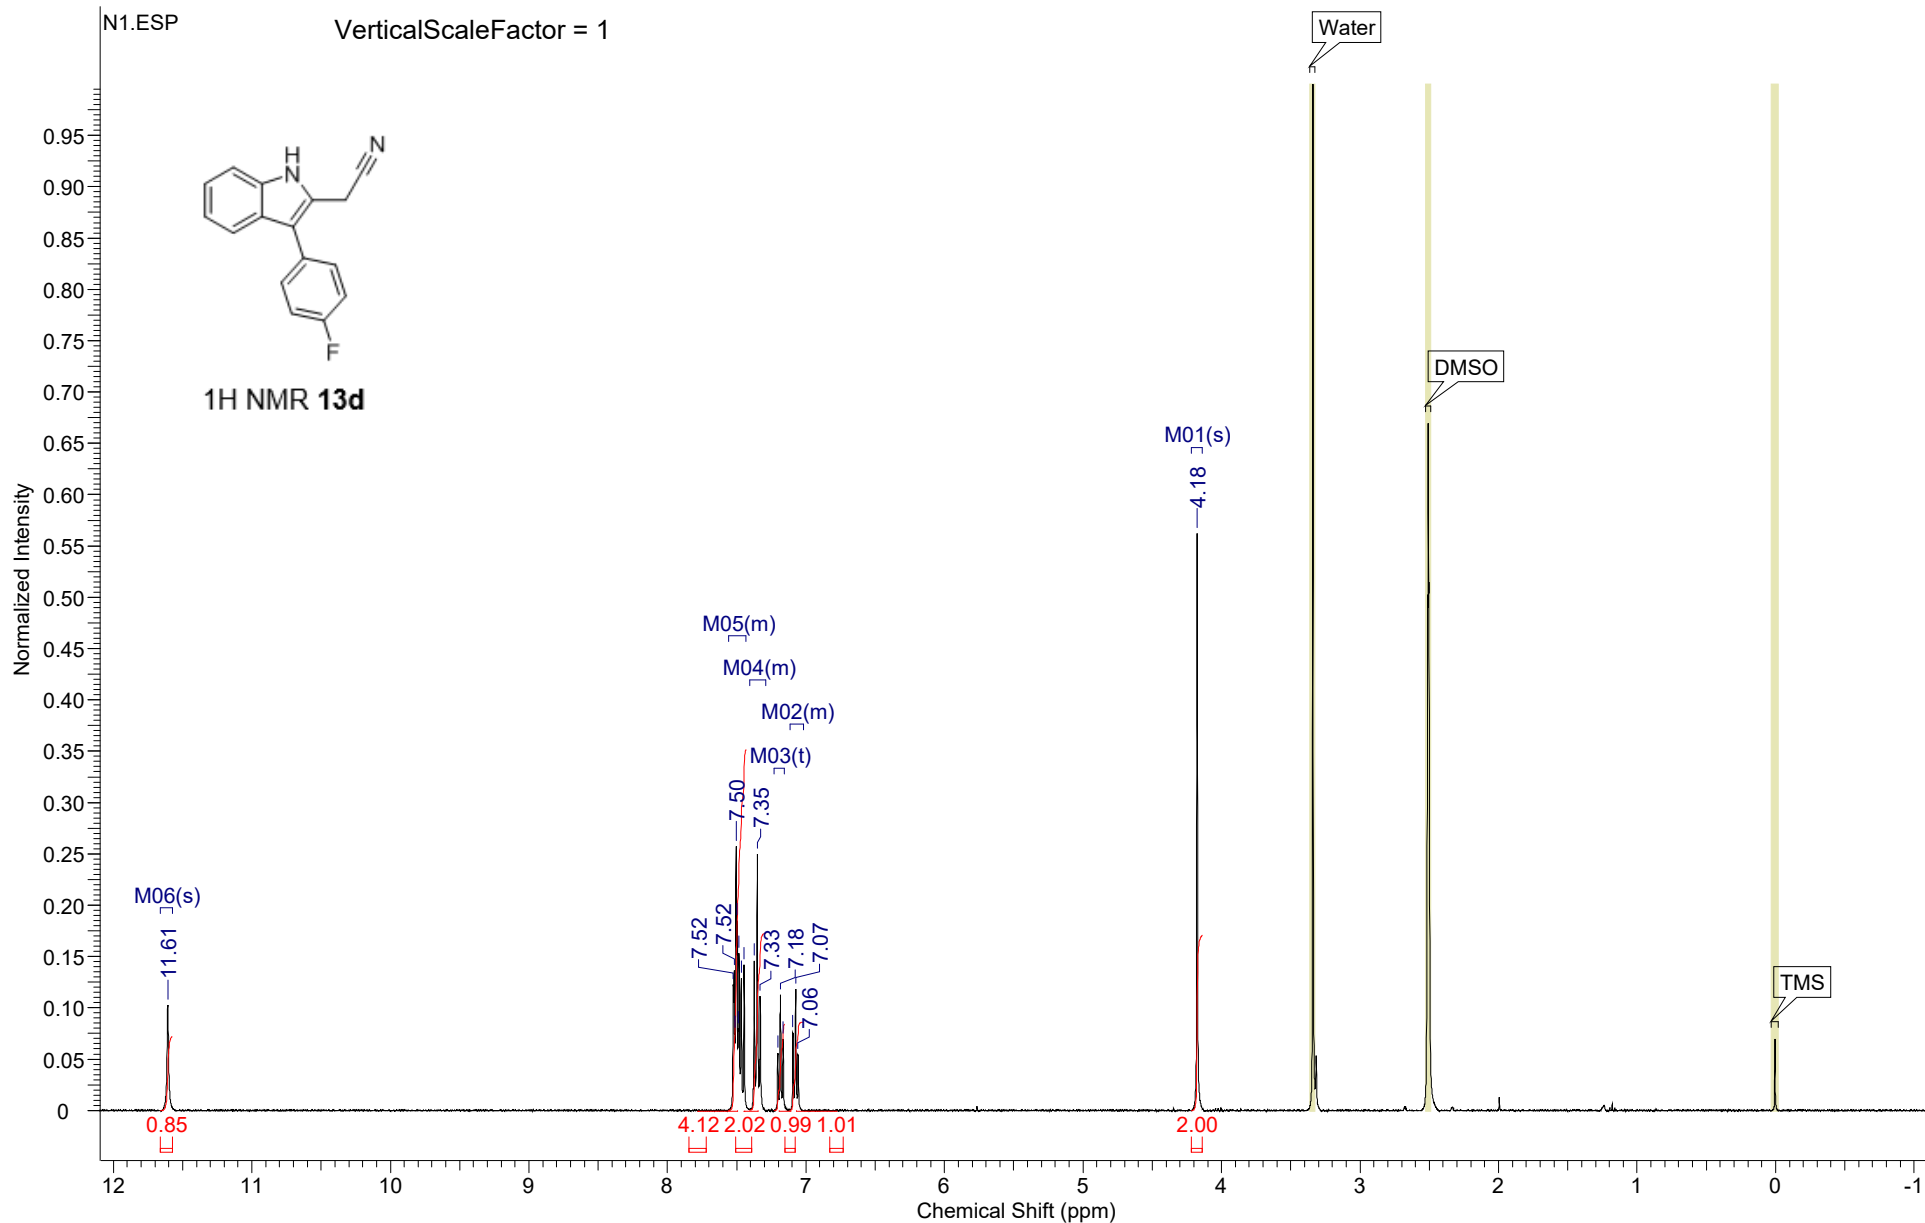

|                        |                              |                      |                      |                       |                      |
|------------------------|------------------------------|----------------------|----------------------|-----------------------|----------------------|
| Acquisition Time (sec) | 1.3631                       | Date                 | 01 Aug 2017 01:51:12 | Date Stamp            | 01 Aug 2017 01:51:12 |
| File Name              | D:\NMR\CJO\CJO-N1\CARBON\fid | Frequency (MHz)      | 100.63               | Nucleus               | 13C                  |
| Number of Transients   | 4000                         | Origin               | spect                | Original Points Count | 32768                |
| Points Count           | 32768                        | Pulse Sequence       | zgpg30               | Receiver Gain         | 196.40               |
| Solvent                | DMSO-d6                      | Spectrum Offset (Hz) | 10061.7803           | Spectrum Type         | STANDARD             |
| Temperature (degree C) | 23.274                       | SW(cyclical) (Hz)    |                      | Sweep Width (Hz)      | 24037.73             |

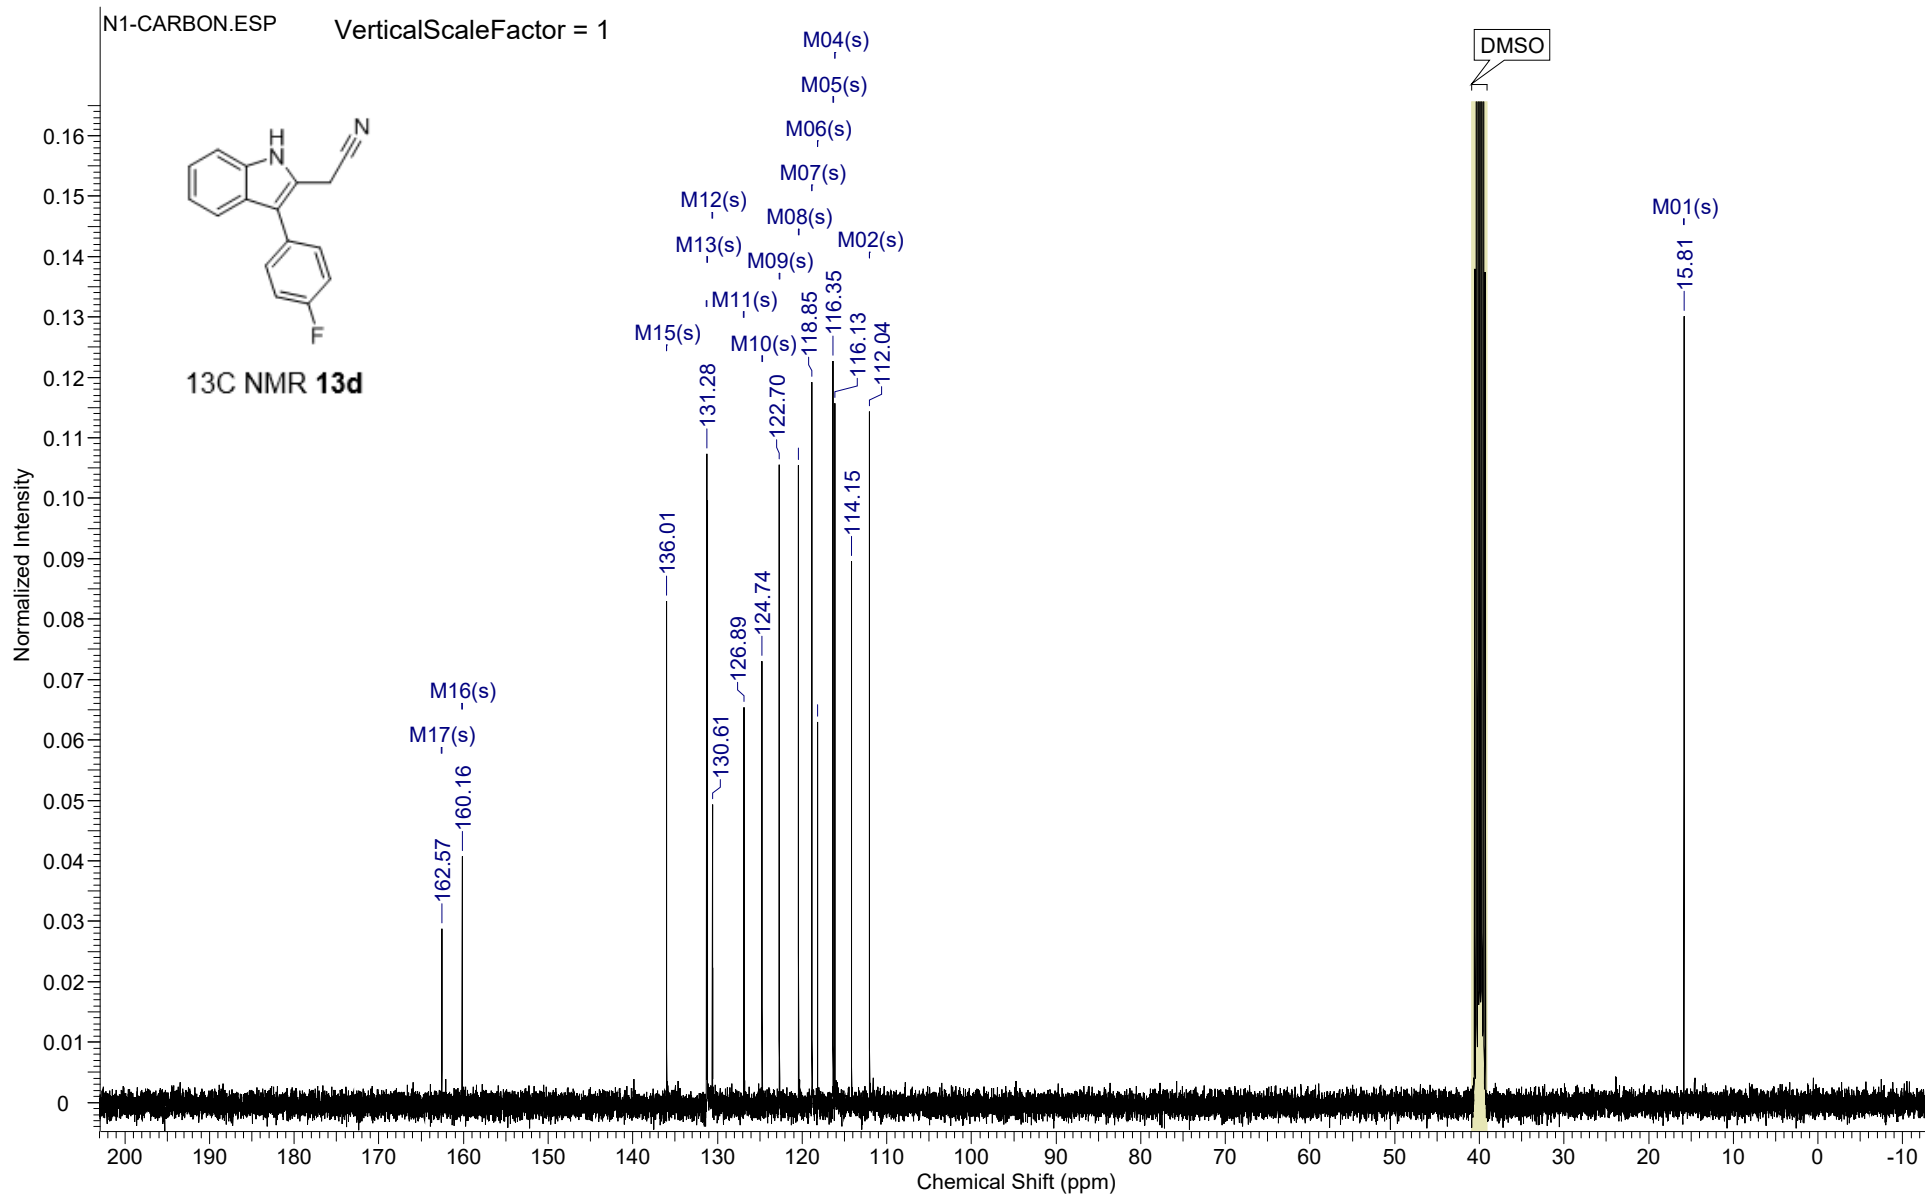

|                               |                          |                               |                      |                |                   |                             |           |
|-------------------------------|--------------------------|-------------------------------|----------------------|----------------|-------------------|-----------------------------|-----------|
| <b>Acquisition Time (sec)</b> | 4.0894                   | <b>Date</b>                   | 09 Aug 2017 09:14:56 |                | <b>Date Stamp</b> | 09 Aug 2017 09:14:56        |           |
| <b>File Name</b>              | D:\CJO-UCSF\CJO-O1\1\fid | <b>Frequency (MHz)</b>        | 400.15               | <b>Nucleus</b> | 1H                | <b>Number of Transients</b> | 32        |
| <b>Origin</b>                 | spect                    | <b>Original Points Count</b>  | 32768                | <b>Owner</b>   | IND-NMR           | <b>Points Count</b>         | 32768     |
| <b>Receiver Gain</b>          | 77.61                    | <b>SW(cyclical) (Hz)</b>      | 8012.82              | <b>Solvent</b> | DMSO-d6           | <b>Spectrum Offset (Hz)</b> | 2470.9260 |
| <b>Sweep Width (Hz)</b>       | 8012.58                  | <b>Temperature (degree C)</b> | 22.859               |                |                   | <b>Spectrum Type</b>        | STANDARD  |

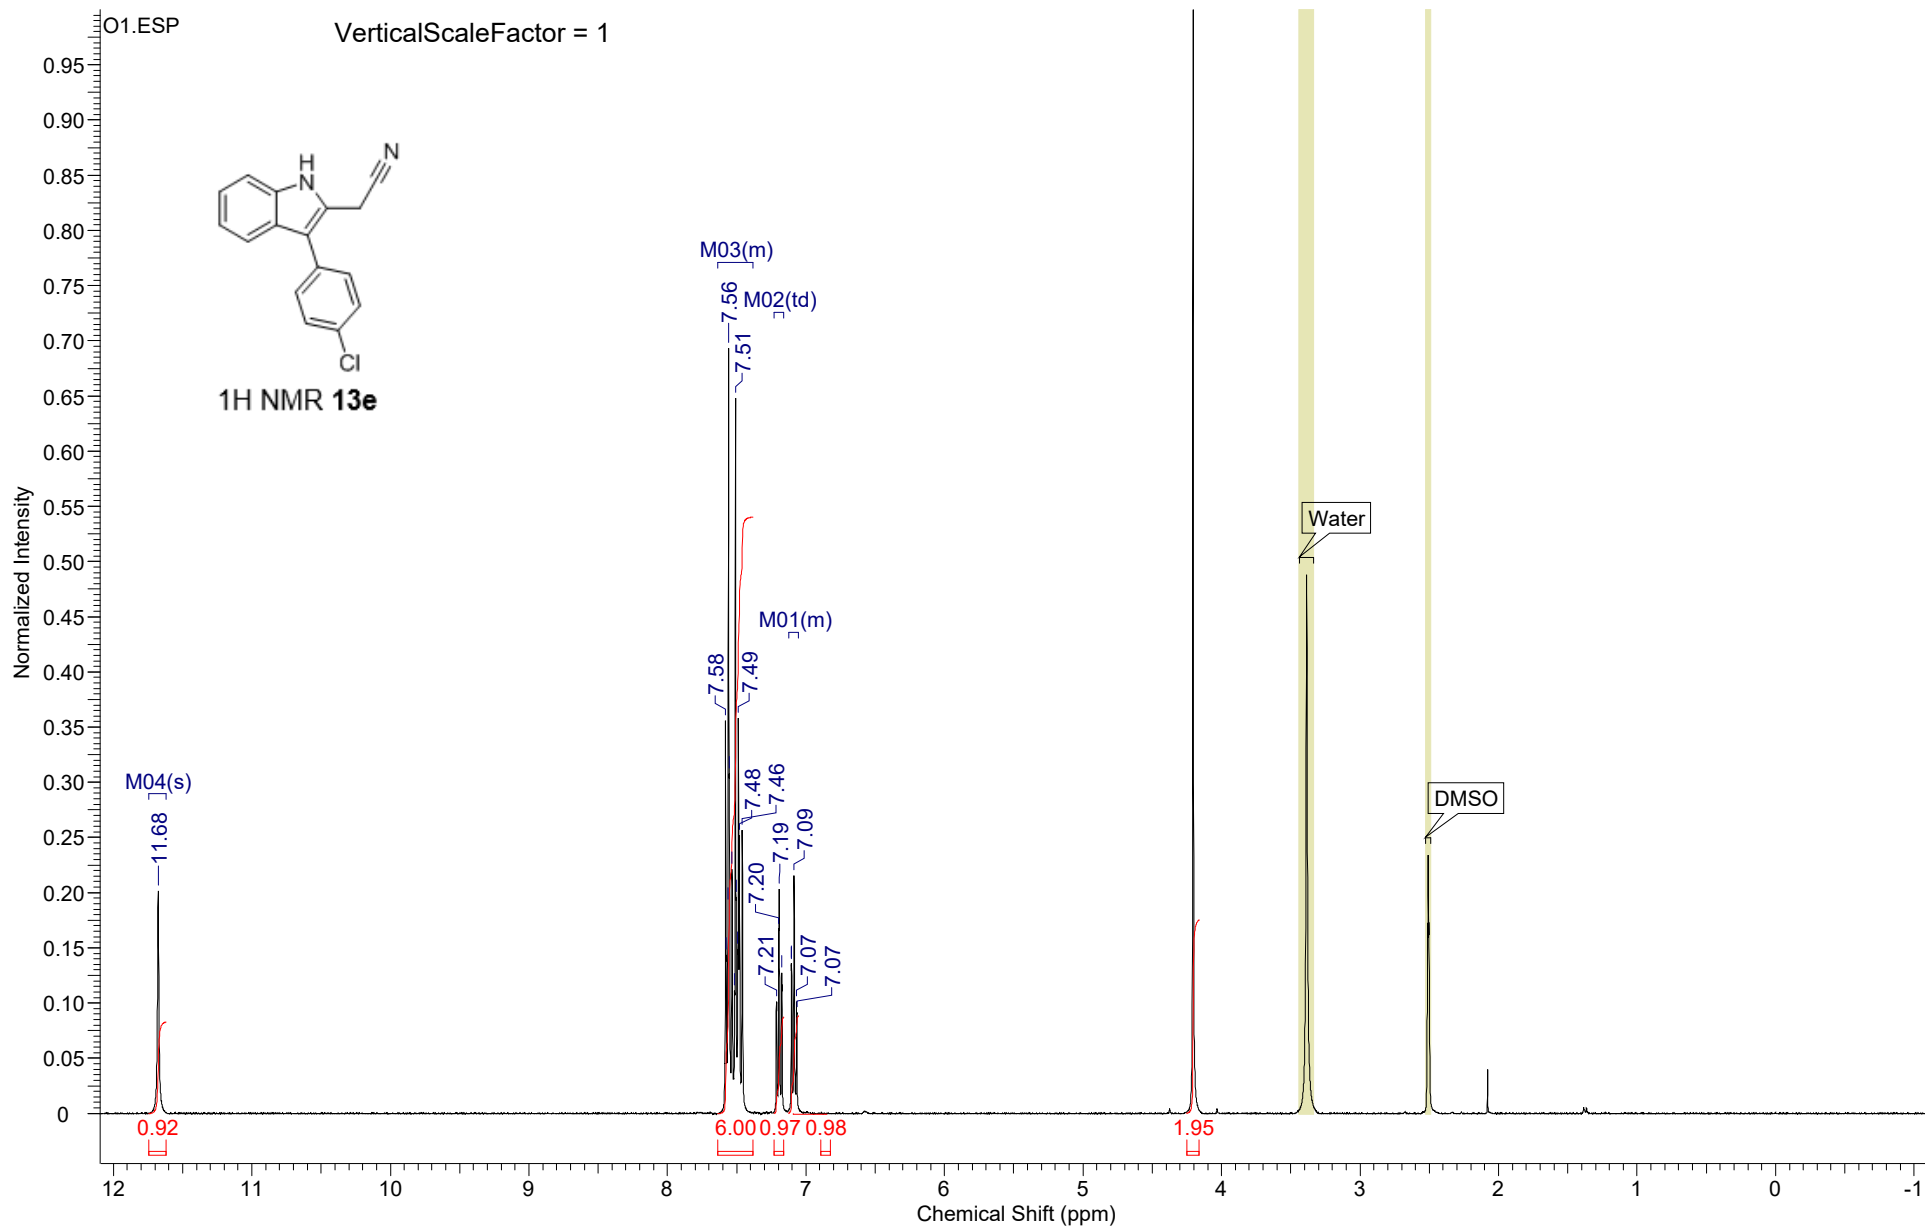

|                               |                                   |                             |                      |                              |                      |
|-------------------------------|-----------------------------------|-----------------------------|----------------------|------------------------------|----------------------|
| <b>Acquisition Time (sec)</b> | 1.3631                            | <b>Date</b>                 | 10 Aug 2017 06:43:28 | <b>Date Stamp</b>            | 10 Aug 2017 06:43:28 |
| <b>File Name</b>              | D:\CJO-UCSF\NMR\CJO-O1\CARBON\fid | <b>Frequency (MHz)</b>      | 100.63               | <b>Nucleus</b>               | <sup>13</sup> C      |
| <b>Number of Transients</b>   | 3000                              | <b>Origin</b>               | spect                | <b>Original Points Count</b> | 32768                |
| <b>Points Count</b>           | 32768                             | <b>Pulse Sequence</b>       | zgpg30               | <b>Receiver Gain</b>         | 196.40               |
| <b>Solvent</b>                | DMSO-d6                           | <b>Spectrum Offset (Hz)</b> | 10061.7803           | <b>Spectrum Type</b>         | STANDARD             |
| <b>Temperature (degree C)</b> | 23.387                            |                             |                      | <b>SW(cyclical) (Hz)</b>     | 24038.46             |
|                               |                                   |                             |                      | <b>Sweep Width (Hz)</b>      | 24037.73             |

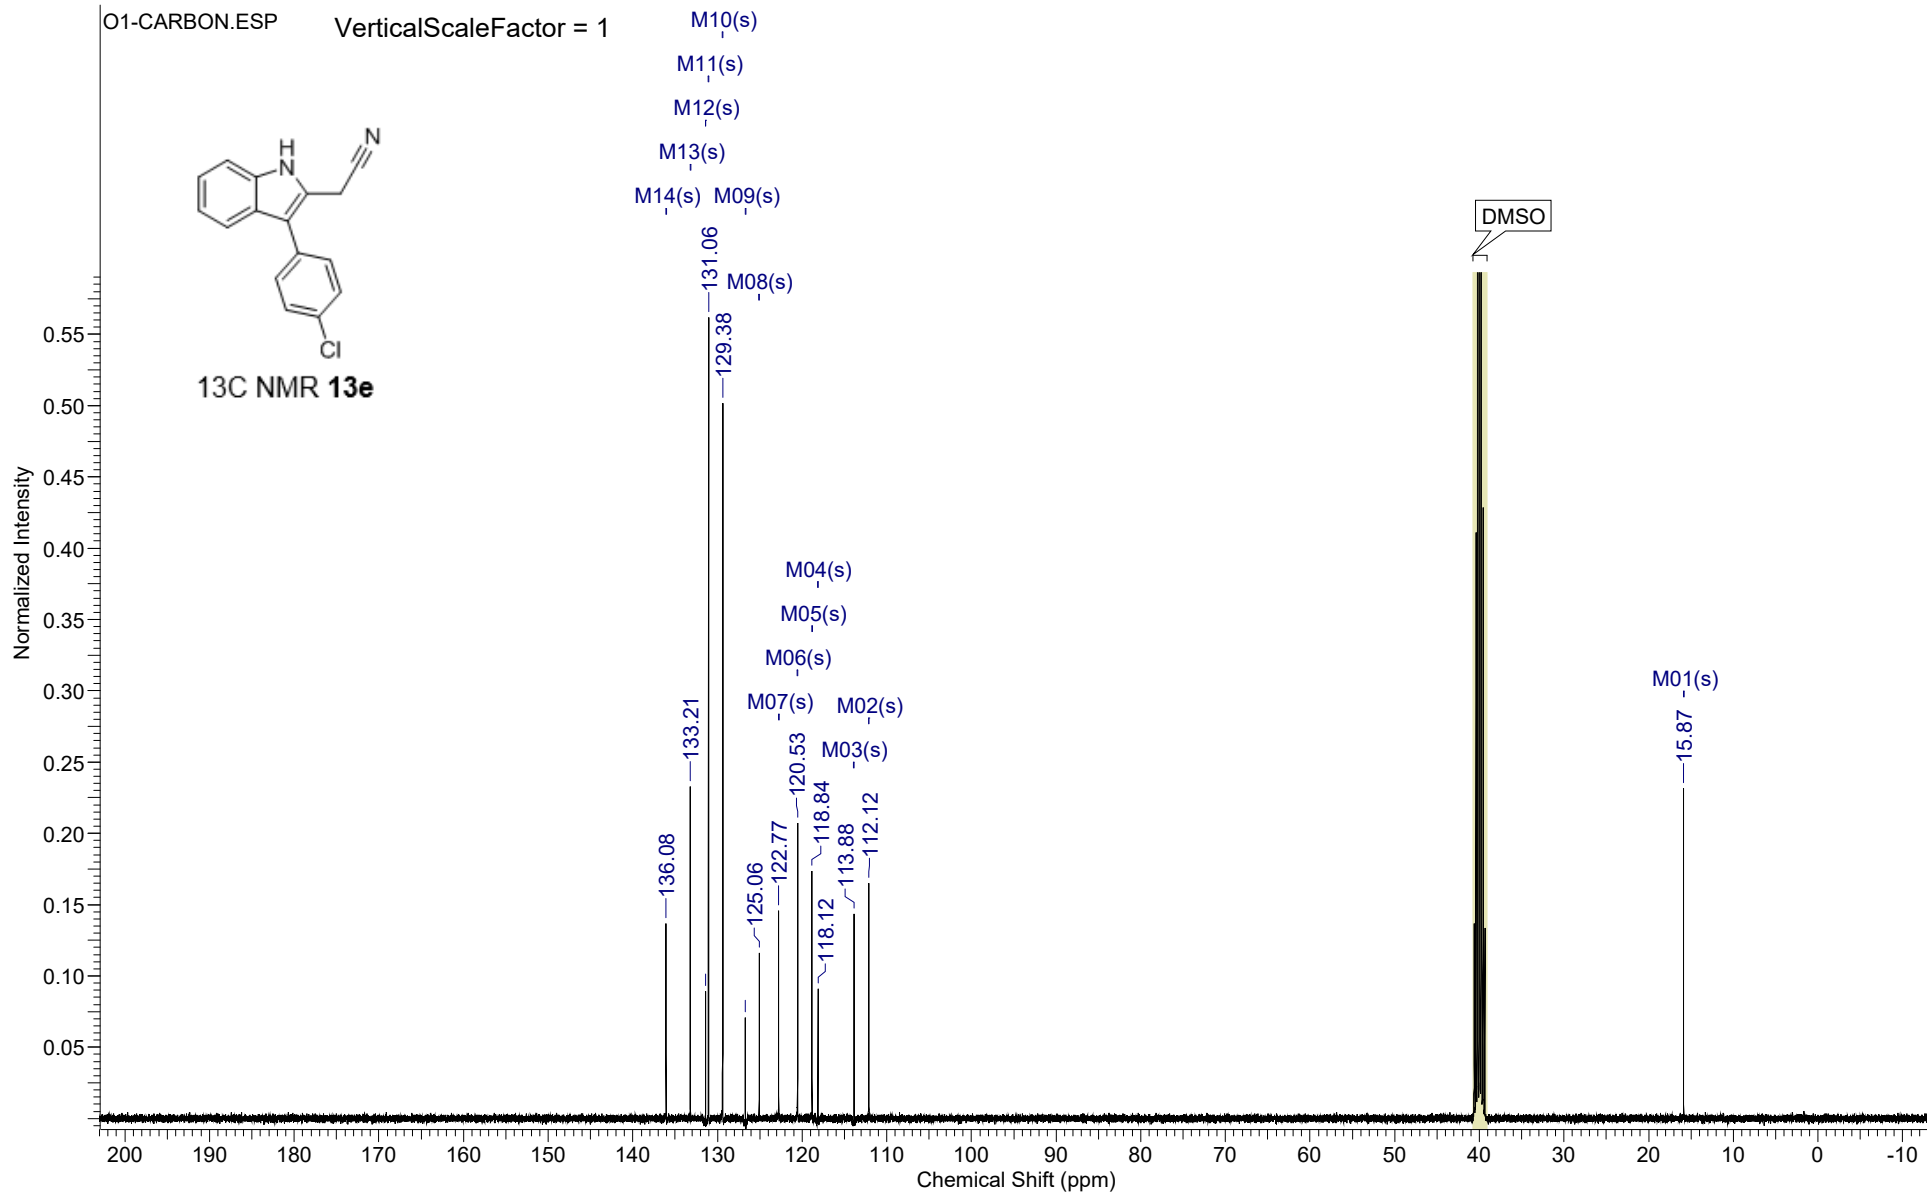

|                        |                         |                        |                      |                      |                      |
|------------------------|-------------------------|------------------------|----------------------|----------------------|----------------------|
| Acquisition Time (sec) | 4.0894                  | Date                   | 07 Aug 2017 12:56:48 | Date Stamp           | 07 Aug 2017 12:56:48 |
| File Name              | D:\NMR\CJO\CJO-P1\1\fid | Frequency (MHz)        | 400.15               | Nucleus              | 1H                   |
| Origin                 | spect                   | Original Points Count  | 32768                | Owner                | IND-NMR              |
| Receiver Gain          | 62.81                   | SW(cyclical) (Hz)      | 8012.82              | Points Count         | 32768                |
| Sweep Width (Hz)       | 8012.58                 | Temperature (degree C) | 22.530               | Solvent              | DMSO-d6              |
|                        |                         |                        |                      | Spectrum Offset (Hz) | 2470.9260            |
|                        |                         |                        |                      | Spectrum Type        | STANDARD             |

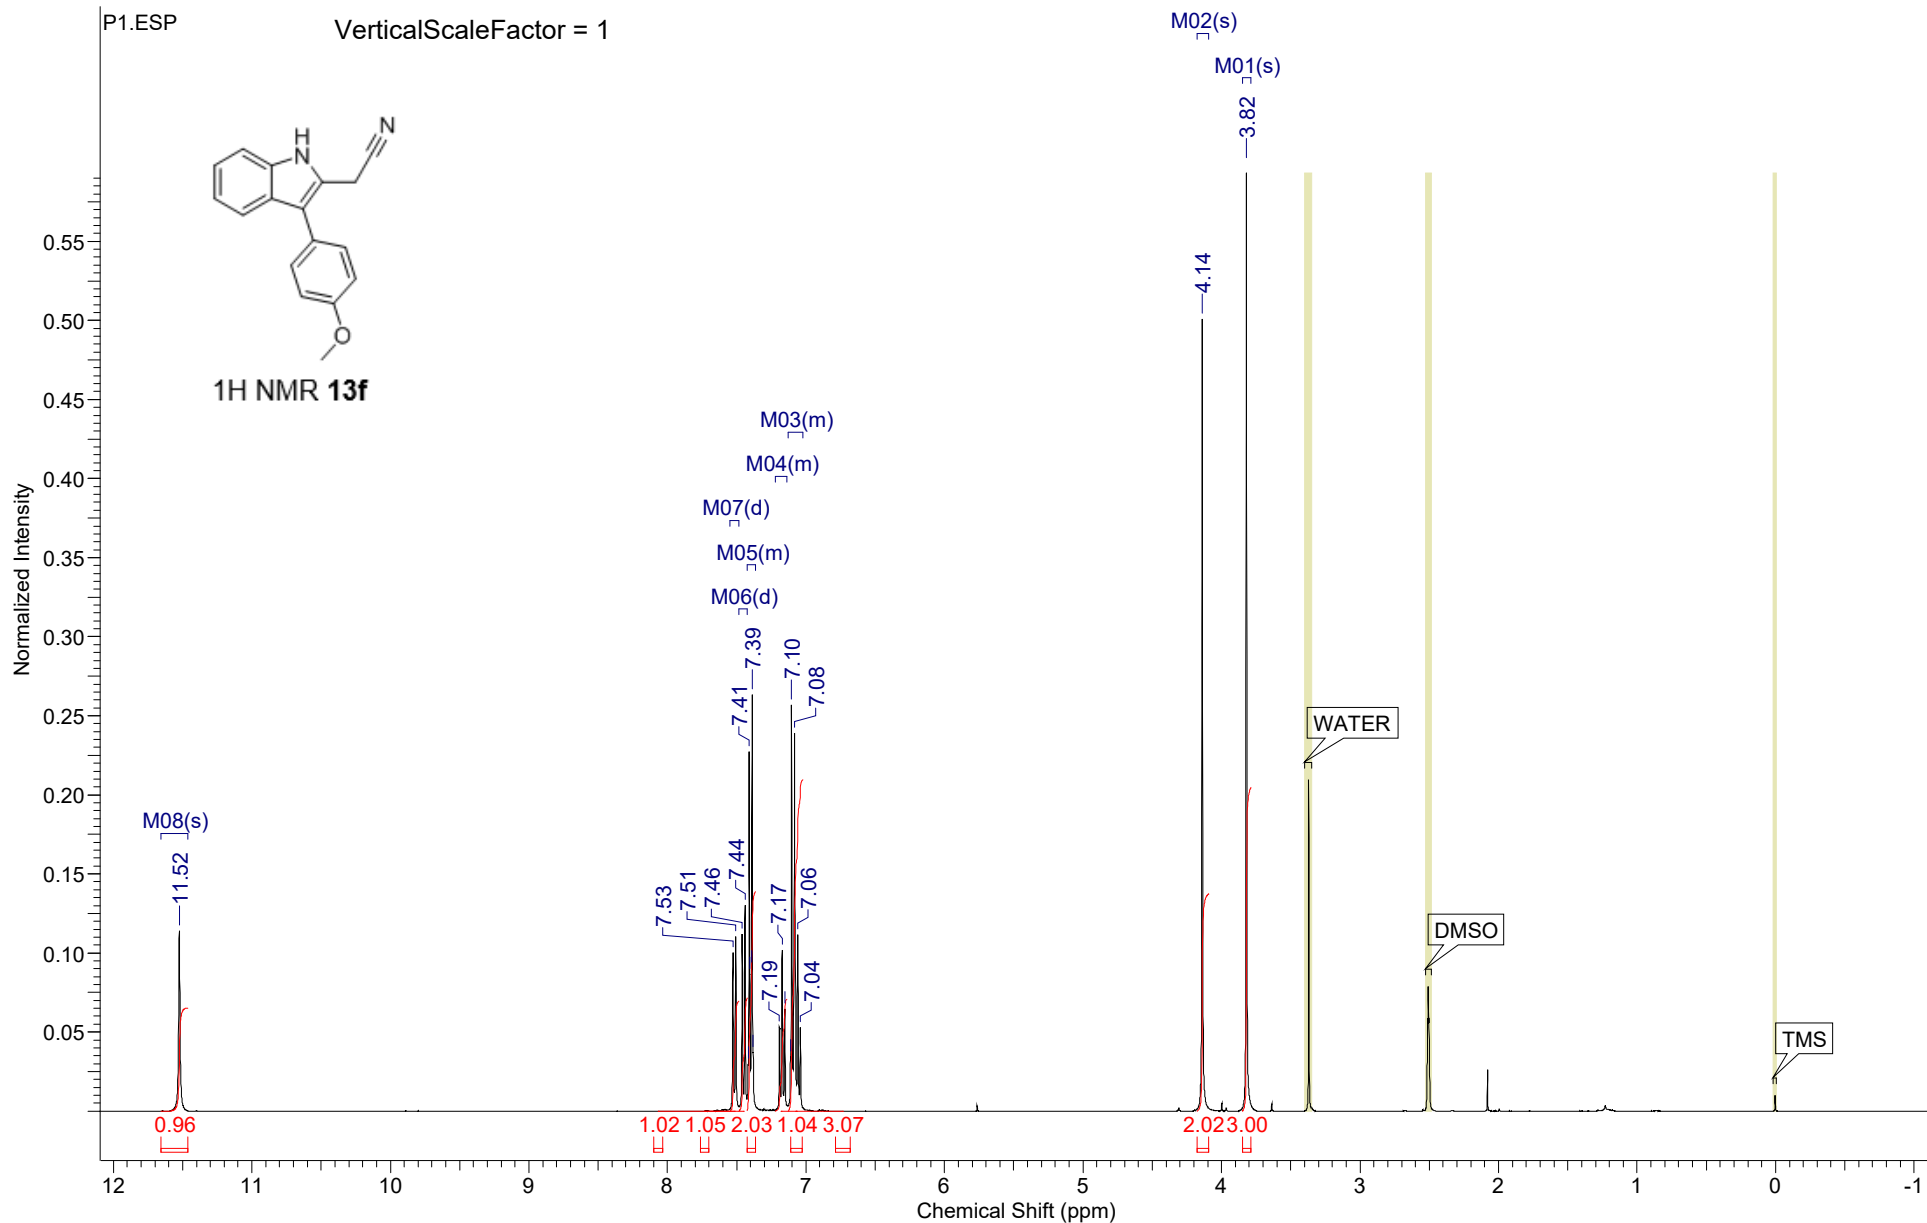

|                               |                          |                               |                      |                      |                   |                             |            |
|-------------------------------|--------------------------|-------------------------------|----------------------|----------------------|-------------------|-----------------------------|------------|
| <b>Acquisition Time (sec)</b> | 1.3631                   | <b>Date</b>                   | 09 Aug 2017 06:43:28 |                      | <b>Date Stamp</b> | 09 Aug 2017 06:43:28        |            |
| <b>File Name</b>              | D:\CJO-UCSF\CJO-P1\2\fid | <b>Frequency (MHz)</b>        | 100.63               | <b>Nucleus</b>       | 13C               | <b>Number of Transients</b> | 3000       |
| <b>Origin</b>                 | spect                    | <b>Original Points Count</b>  | 32768                | <b>Owner</b>         | IND-NMR           | <b>Points Count</b>         | 32768      |
| <b>Receiver Gain</b>          | 196.40                   | <b>SW(cyclical) (Hz)</b>      | 24038.46             | <b>Solvent</b>       | DMSO-d6           | <b>Spectrum Offset (Hz)</b> | 10061.7803 |
| <b>Sweep Width (Hz)</b>       | 24037.73                 | <b>Temperature (degree C)</b> | 23.282               | <b>Spectrum Type</b> | STANDARD          |                             |            |

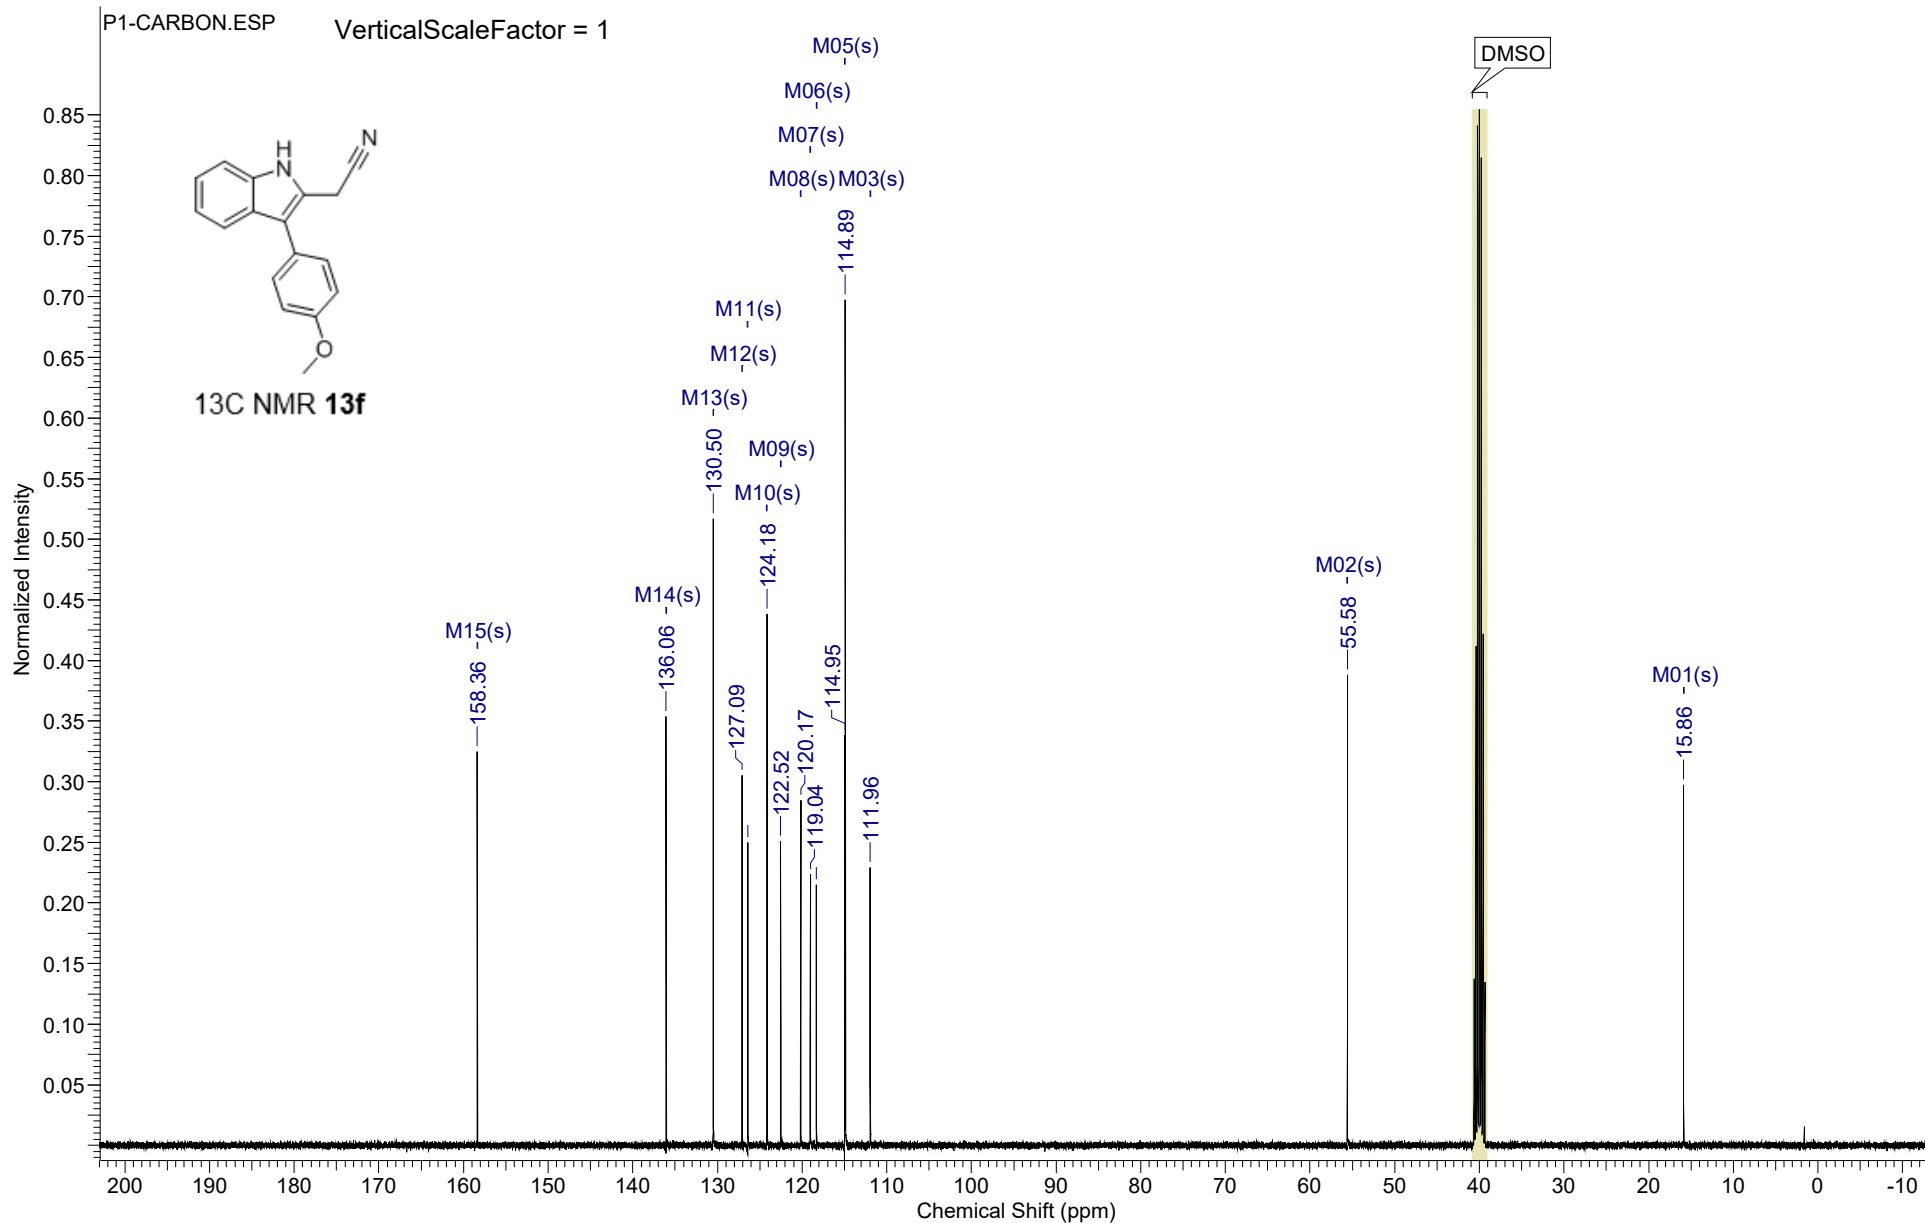



|                               |                          |                               |                      |                      |                      |                             |           |
|-------------------------------|--------------------------|-------------------------------|----------------------|----------------------|----------------------|-----------------------------|-----------|
| <b>Acquisition Time (sec)</b> | 4.0894                   | <b>Date</b>                   | 09 Aug 2017 09:04:16 | <b>Date Stamp</b>    | 09 Aug 2017 09:04:16 |                             |           |
| <b>File Name</b>              | D:\CJO-UCSF\CJO-R1\1\fid | <b>Frequency (MHz)</b>        | 400.15               | <b>Nucleus</b>       | 1H                   | <b>Number of Transients</b> | 32        |
| <b>Origin</b>                 | spect                    | <b>Original Points Count</b>  | 32768                | <b>Owner</b>         | IND-NMR              | <b>Points Count</b>         | 32768     |
| <b>Receiver Gain</b>          | 97.12                    | <b>SW(cyclical) (Hz)</b>      | 8012.82              | <b>Solvent</b>       | DMSO-d6              | <b>Spectrum Offset (Hz)</b> | 2470.9260 |
| <b>Sweep Width (Hz)</b>       | 8012.58                  | <b>Temperature (degree C)</b> | 22.839               | <b>Spectrum Type</b> | STANDARD             |                             |           |

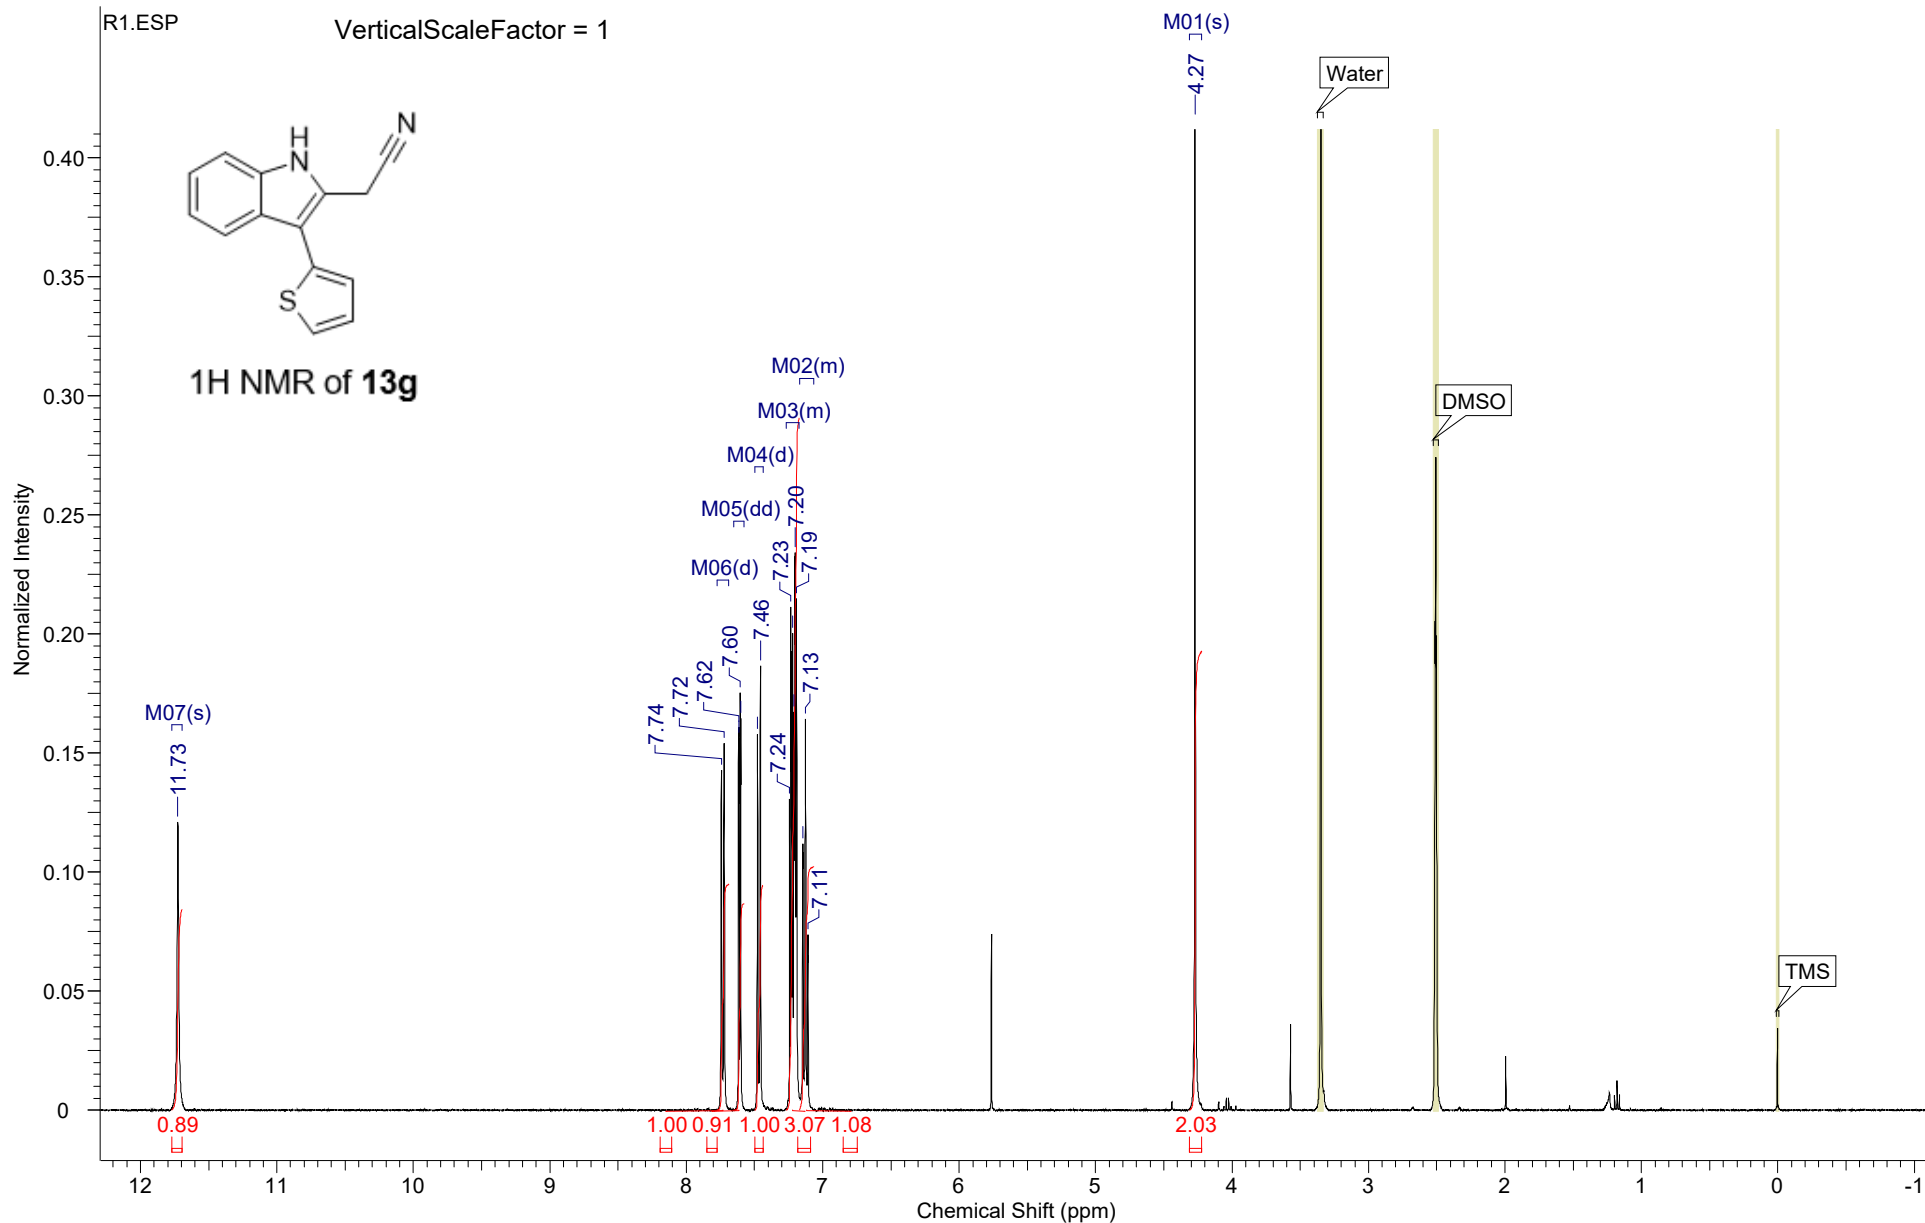

|                        |                                   |                      |                      |                       |                      |
|------------------------|-----------------------------------|----------------------|----------------------|-----------------------|----------------------|
| Acquisition Time (sec) | 1.3631                            | Date                 | 10 Aug 2017 03:48:32 | Date Stamp            | 10 Aug 2017 03:48:32 |
| File Name              | D:\CJO-UCSF\NMR\CJO-R1\CARBON\fid | Frequency (MHz)      | 100.63               | Nucleus               | <sup>13</sup> C      |
| Number of Transients   | 3000                              | Origin               | spect                | Original Points Count | 32768                |
| Points Count           | 32768                             | Pulse Sequence       | zgpg30               | Receiver Gain         | 196.40               |
| Solvent                | DMSO-d6                           | Spectrum Offset (Hz) | 10061.7803           | Spectrum Type         | STANDARD             |
| Temperature (degree C) | 23.213                            | SW(cyclical) (Hz)    |                      | Sweep Width (Hz)      | 24037.73             |

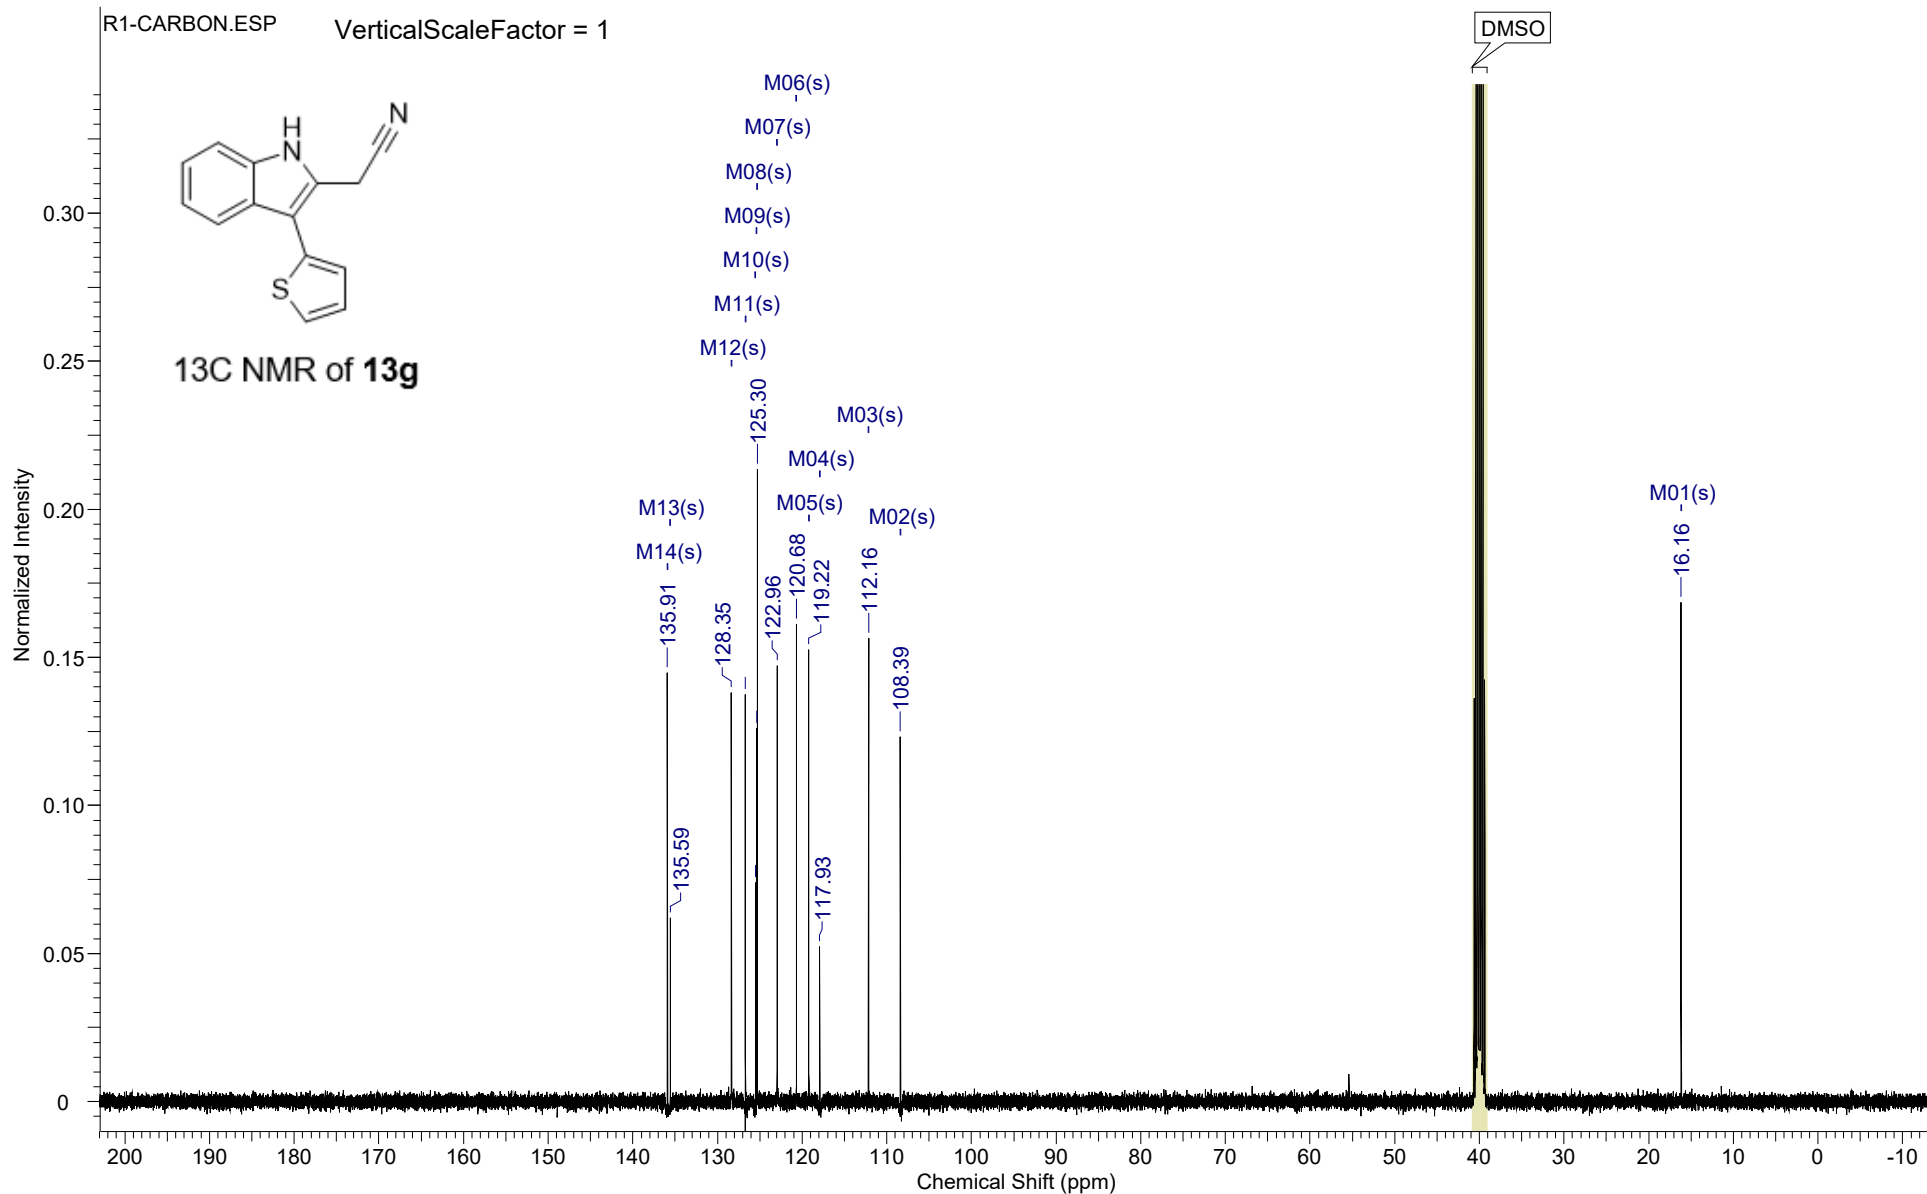

|                               |                         |                               |                        |                   |                      |                             |                             |                       |          |
|-------------------------------|-------------------------|-------------------------------|------------------------|-------------------|----------------------|-----------------------------|-----------------------------|-----------------------|----------|
| <b>Acquisition Time (sec)</b> | 4.0894                  | <b>Date</b>                   | 04 Aug 2017 11:12:16   | <b>Date Stamp</b> | 04 Aug 2017 11:12:16 |                             |                             |                       |          |
| <b>File Name</b>              | D:\NMR\CJO\CJO-H1\1\fid |                               | <b>Frequency (MHz)</b> | 400.15            | <b>Nucleus</b>       | 1H                          | <b>Number of Transients</b> | 32                    |          |
| <b>Origin</b>                 | spect                   | <b>Original Points Count</b>  | 32768                  | <b>Owner</b>      | IND-NMR              | <b>Points Count</b>         | 32768                       | <b>Pulse Sequence</b> | zg30     |
| <b>Receiver Gain</b>          | 125.72                  | <b>SW(cyclical) (Hz)</b>      | 8012.82                | <b>Solvent</b>    | DMSO-d6              | <b>Spectrum Offset (Hz)</b> | 2470.9260                   | <b>Spectrum Type</b>  | STANDARD |
| <b>Sweep Width (Hz)</b>       | 8012.58                 | <b>Temperature (degree C)</b> | 22.760                 |                   |                      |                             |                             |                       |          |

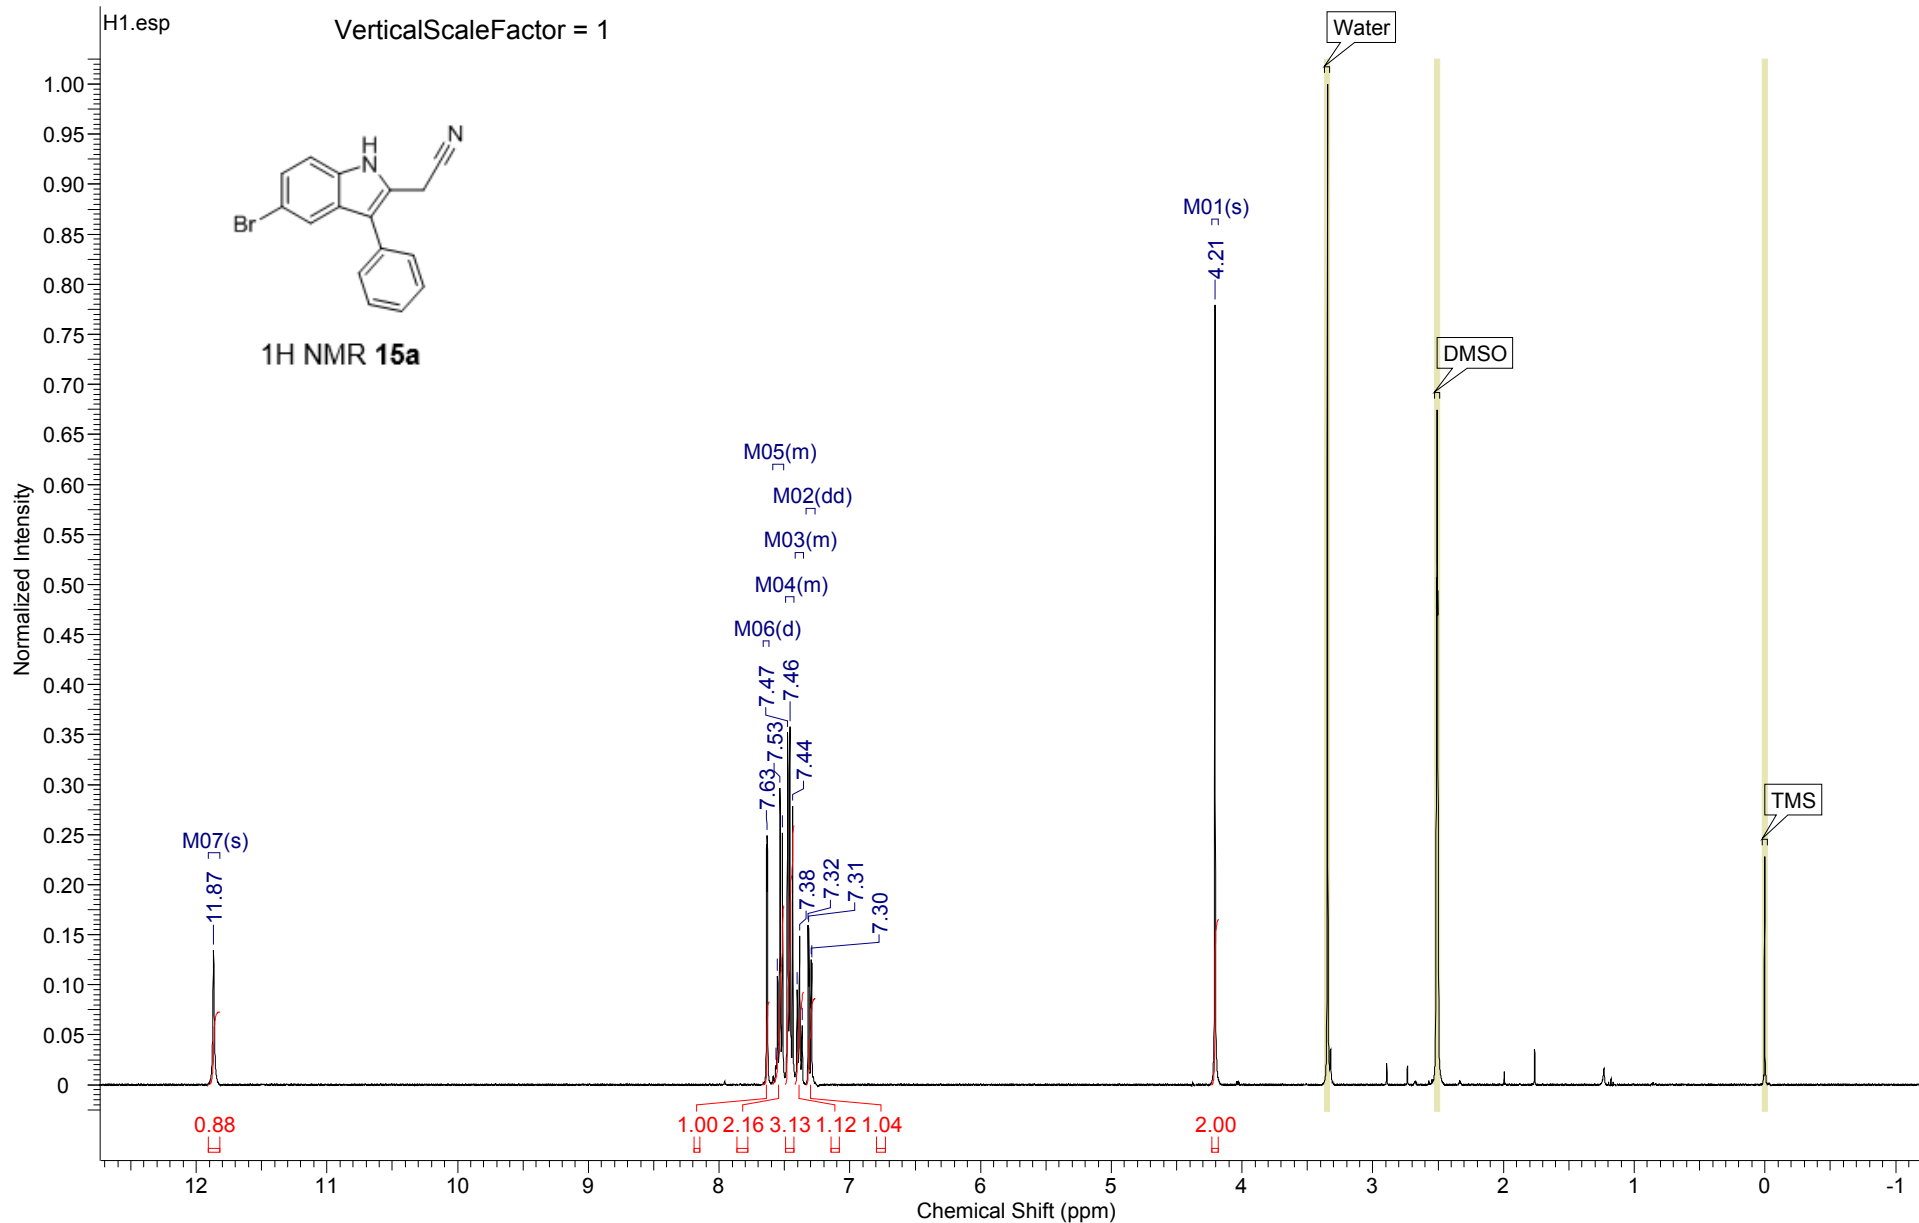

|                        |                              |                      |                      |                       |                      |
|------------------------|------------------------------|----------------------|----------------------|-----------------------|----------------------|
| Acquisition Time (sec) | 1.3631                       | Date                 | 05 Aug 2017 19:20:48 | Date Stamp            | 05 Aug 2017 19:20:48 |
| File Name              | D:\NMR\CJO\CJO-H1\CARBON\fid | Frequency (MHz)      | 100.63               | Nucleus               | 13C                  |
| Number of Transients   | 3000                         | Origin               | spect                | Original Points Count | 32768                |
| Points Count           | 32768                        | Pulse Sequence       | zgpg30               | Receiver Gain         | 196.40               |
| Solvent                | DMSO-d6                      | Spectrum Offset (Hz) | 10061.7803           | Spectrum Type         | STANDARD             |
| Temperature (degree C) | 23.208                       | SW(cyclical) (Hz)    |                      | Sweep Width (Hz)      | 24037.73             |

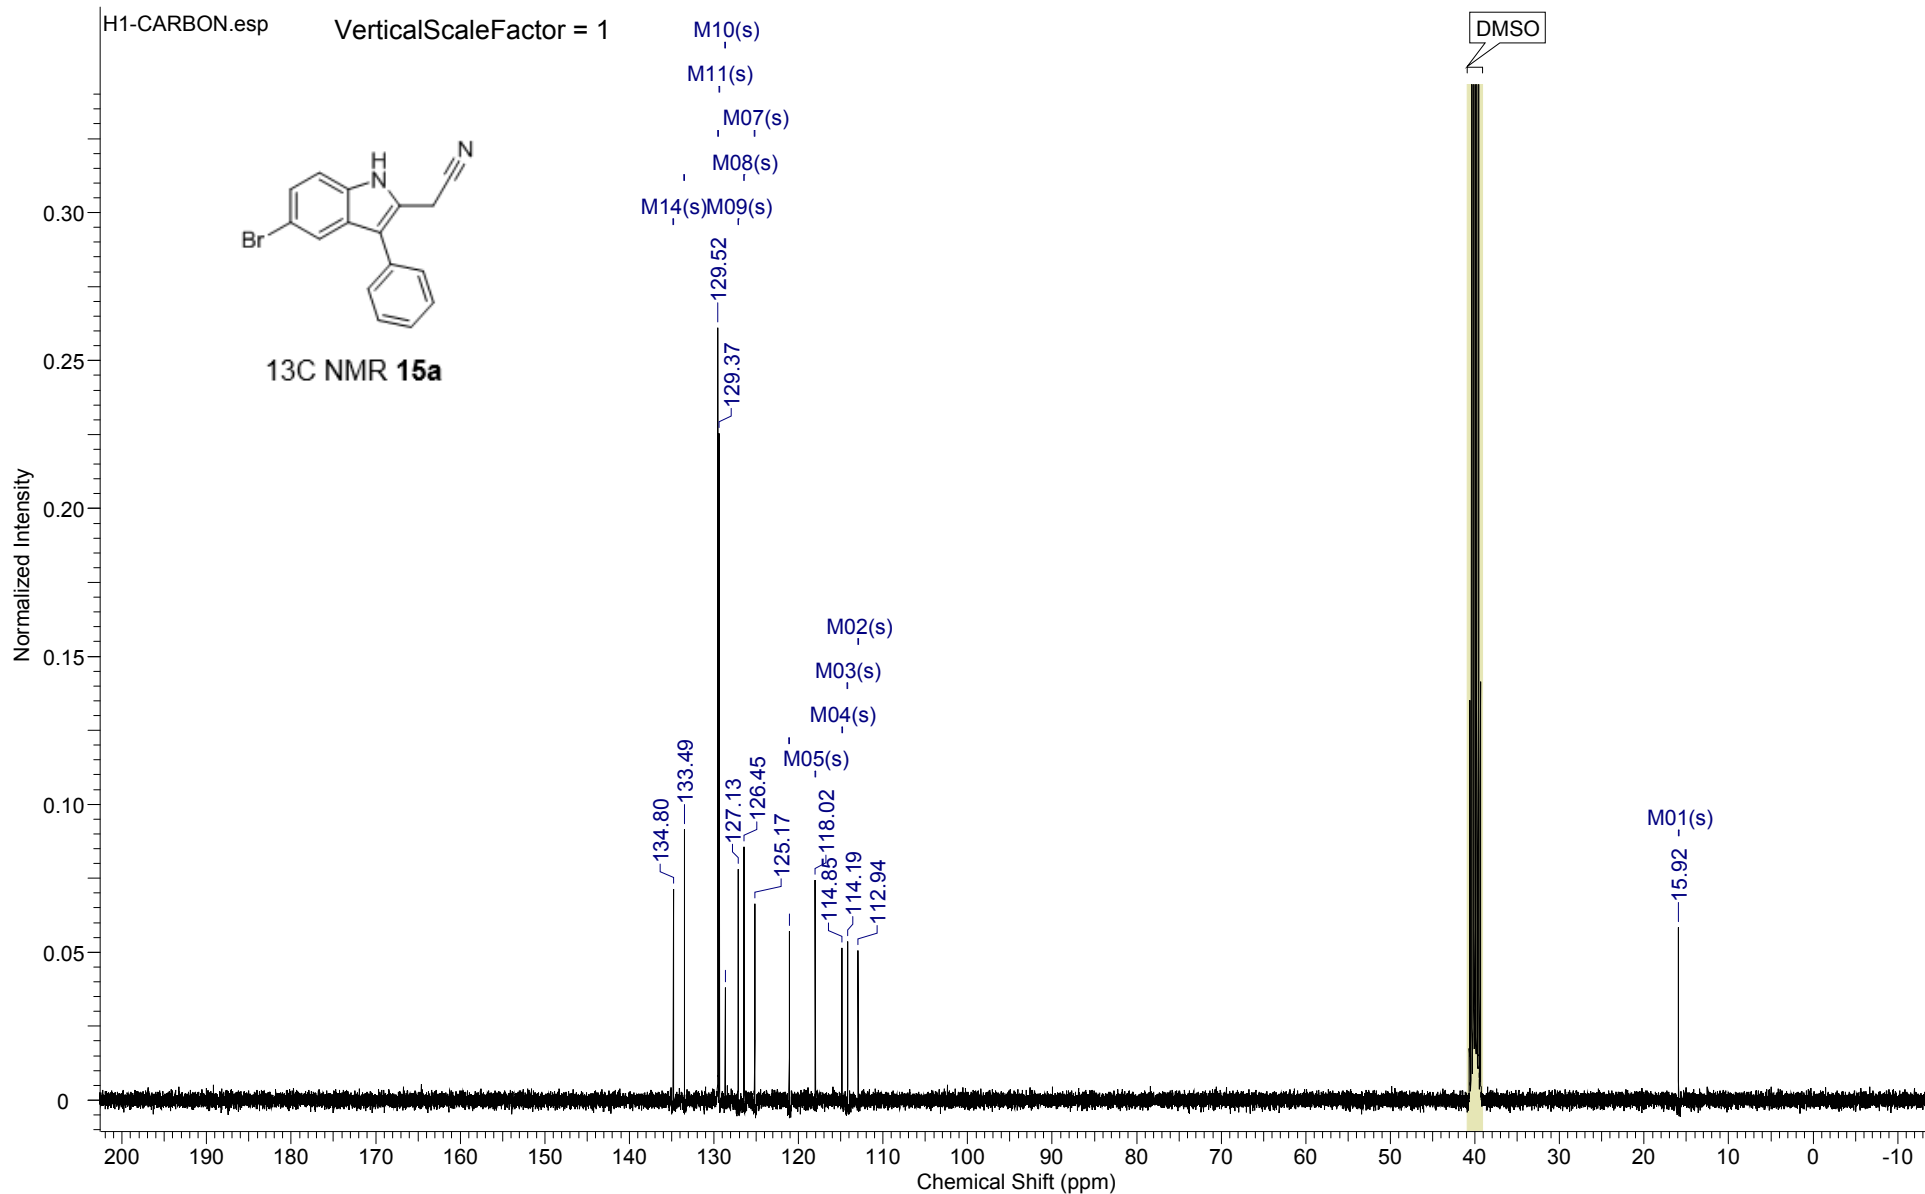

|                        |                        |                        |                      |                      |                      |
|------------------------|------------------------|------------------------|----------------------|----------------------|----------------------|
| Acquisition Time (sec) | 4.0894                 | Date                   | 04 Aug 2017 11:08:00 | Date Stamp           | 04 Aug 2017 11:08:00 |
| File Name              | D:\NMR\CJO\CJO-G1\1fid | Frequency (MHz)        | 400.15               | Nucleus              | <sup>1</sup> H       |
| Origin                 | spect                  | Original Points Count  | 32768                | Owner                | IND-NMR              |
| Receiver Gain          | 110.38                 | SW(cyclical) (Hz)      | 8012.82              | Points Count         | 32768                |
| Sweep Width (Hz)       | 8012.58                | Temperature (degree C) | 22.780               | Solvent              | DMSO-d6              |
|                        |                        |                        |                      | Spectrum Offset (Hz) | 2470.9260            |
|                        |                        |                        |                      | Spectrum Type        | STANDARD             |

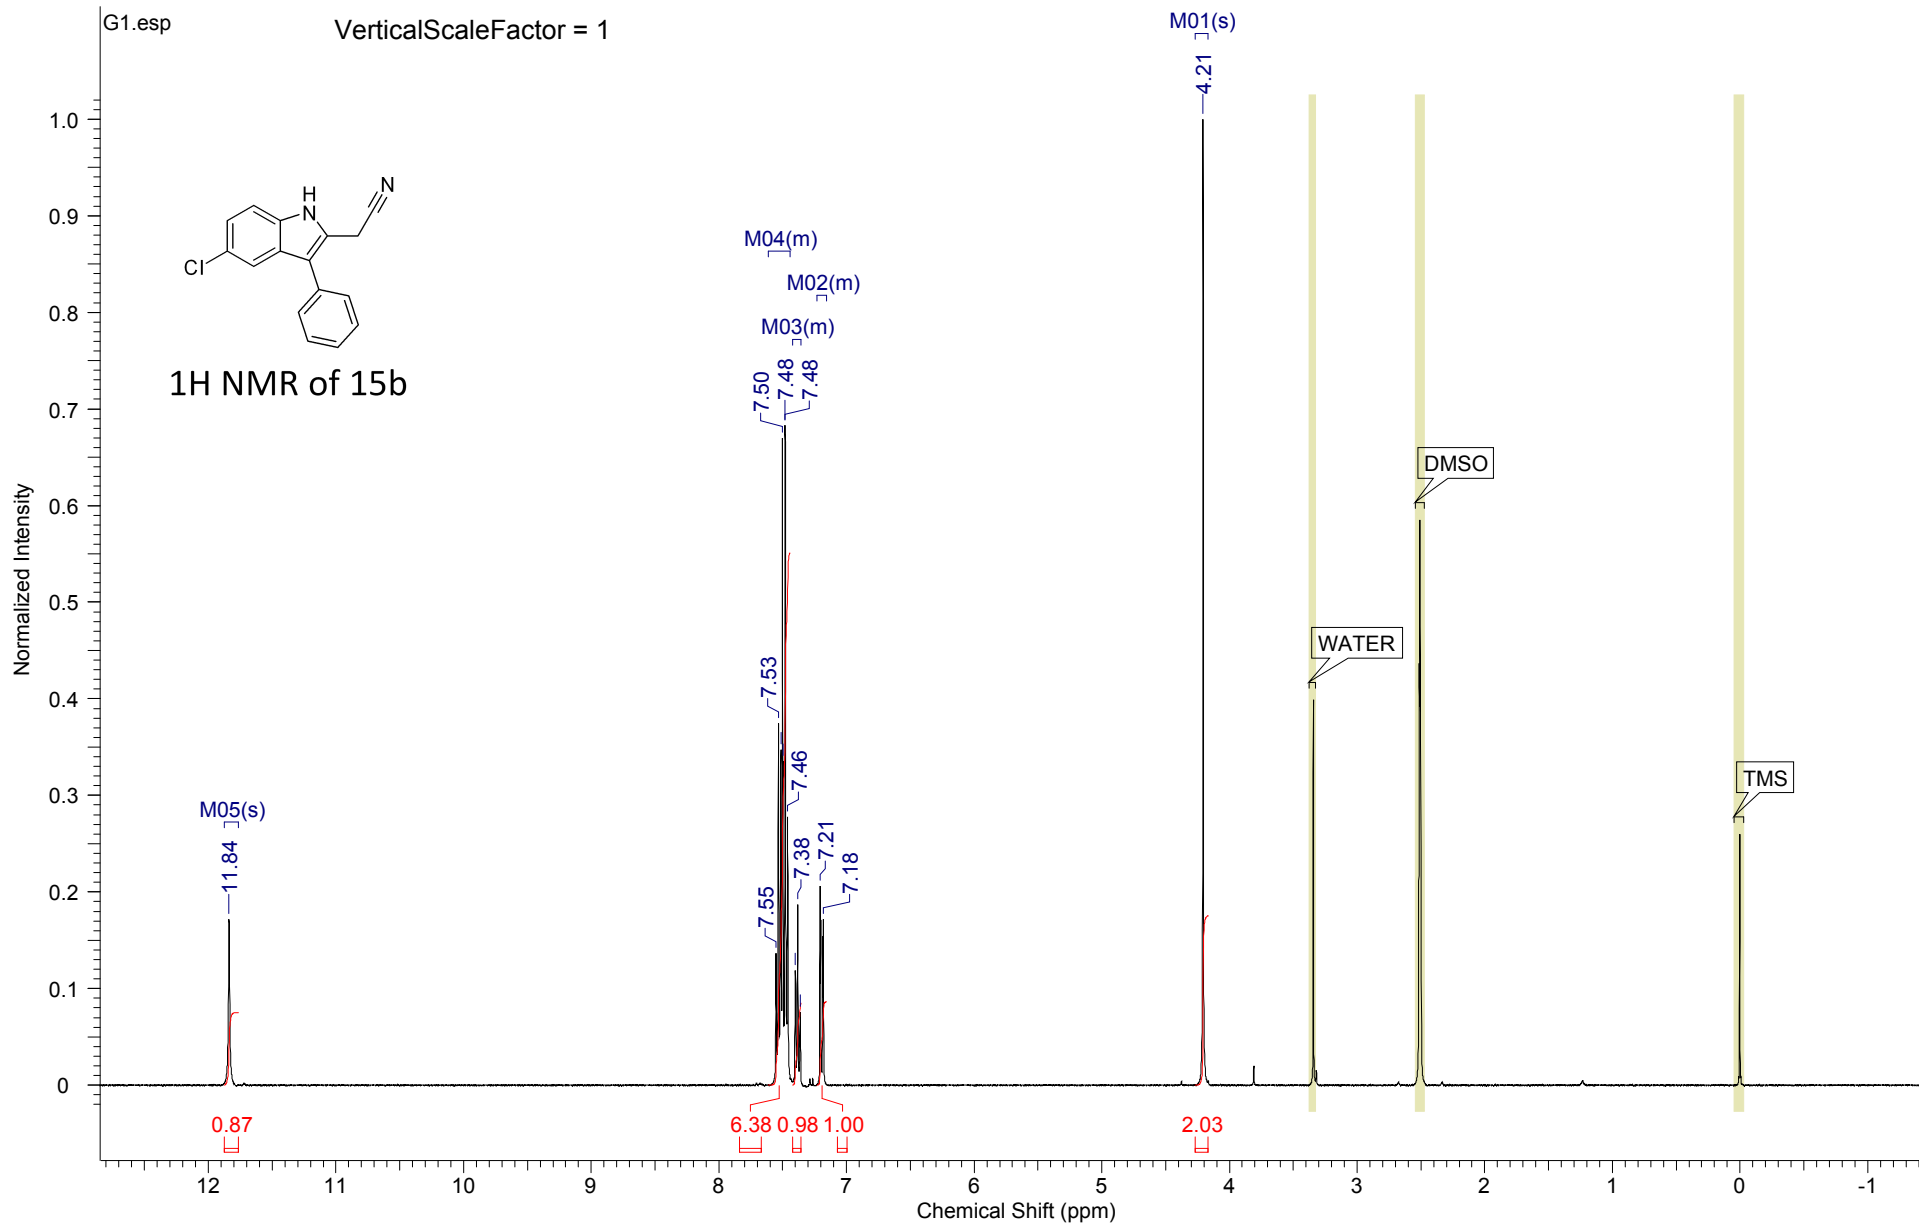

|                               |                              |                             |                      |                              |                      |
|-------------------------------|------------------------------|-----------------------------|----------------------|------------------------------|----------------------|
| <b>Acquisition Time (sec)</b> | 1.3631                       | <b>Date</b>                 | 05 Aug 2017 16:25:52 | <b>Date Stamp</b>            | 05 Aug 2017 16:25:52 |
| <b>File Name</b>              | D:\NMR\CJO\CJO-G1\CARBON\fid | <b>Frequency (MHz)</b>      | 100.63               | <b>Nucleus</b>               | 13C                  |
| <b>Number of Transients</b>   | 3000                         | <b>Origin</b>               | spect                | <b>Original Points Count</b> | 32768                |
| <b>Points Count</b>           | 32768                        | <b>Pulse Sequence</b>       | zgpg30               | <b>Receiver Gain</b>         | 196.40               |
| <b>Solvent</b>                | DMSO-d6                      | <b>Spectrum Offset (Hz)</b> | 10061.7803           | <b>Spectrum Type</b>         | STANDARD             |
| <b>Temperature (degree C)</b> | 23.247                       |                             |                      | <b>SW(cyclical) (Hz)</b>     | 24038.46             |
|                               |                              |                             |                      | <b>Sweep Width (Hz)</b>      | 24037.73             |

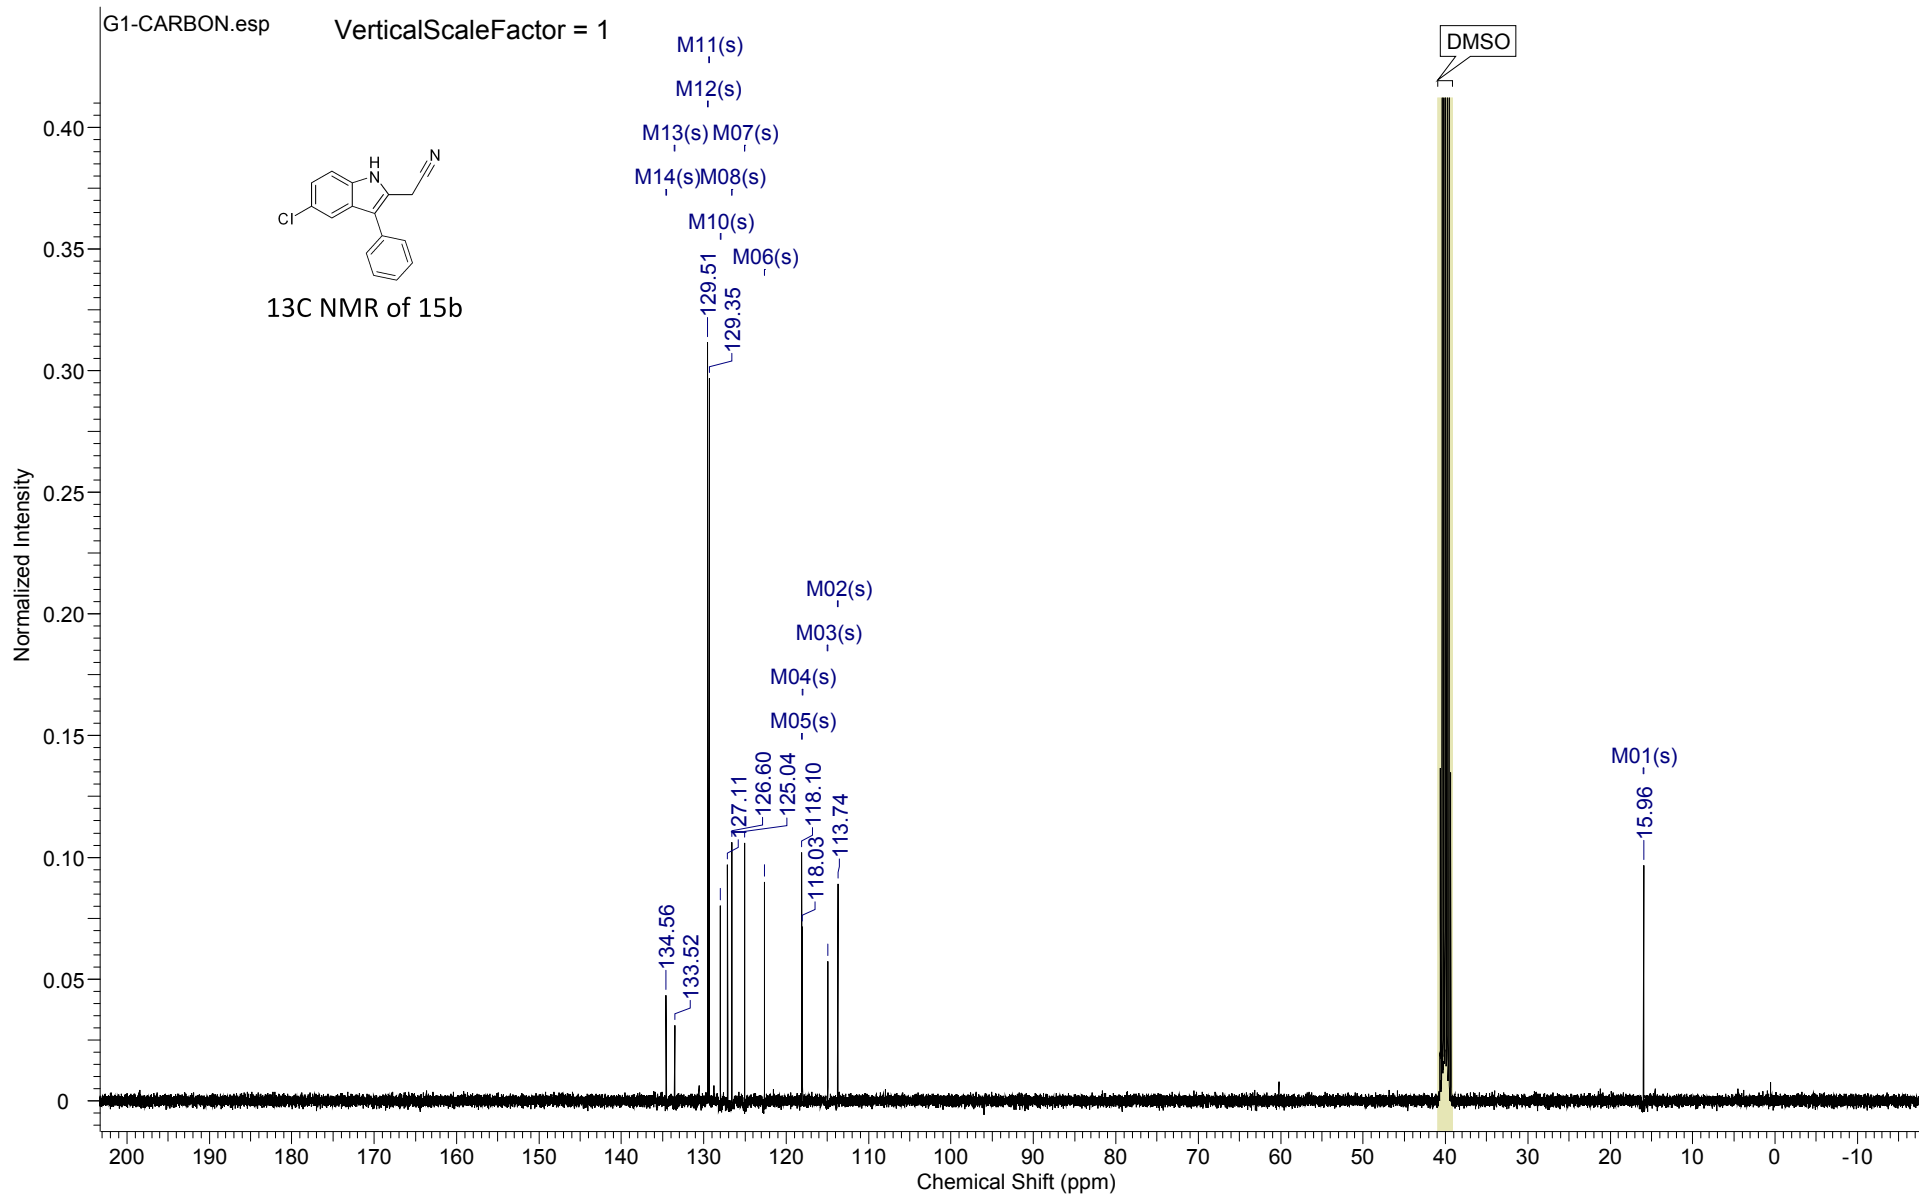

|                        |                        |                        |                      |            |                      |                      |                      |                |          |
|------------------------|------------------------|------------------------|----------------------|------------|----------------------|----------------------|----------------------|----------------|----------|
| Acquisition Time (sec) | 4.0894                 | Date                   | 01 Aug 2017 08:13:04 | Date Stamp | 01 Aug 2017 08:13:04 |                      |                      |                |          |
| File Name              | D:\NMR\CJO\CJO-F11\fid |                        | Frequency (MHz)      | 400.15     | Nucleus              | 1H                   | Number of Transients | 32             |          |
| Origin                 | spect                  | Original Points Count  | 32768                | Owner      | IND-NMR              | Points Count         | 32768                | Pulse Sequence | zg30     |
| Receiver Gain          | 141.25                 | SW(cyclical) (Hz)      | 8012.82              | Solvent    | DMSO-d6              | Spectrum Offset (Hz) | 2470.9260            | Spectrum Type  | STANDARD |
| Sweep Width (Hz)       | 8012.58                | Temperature (degree C) | 22.666               |            |                      |                      |                      |                |          |

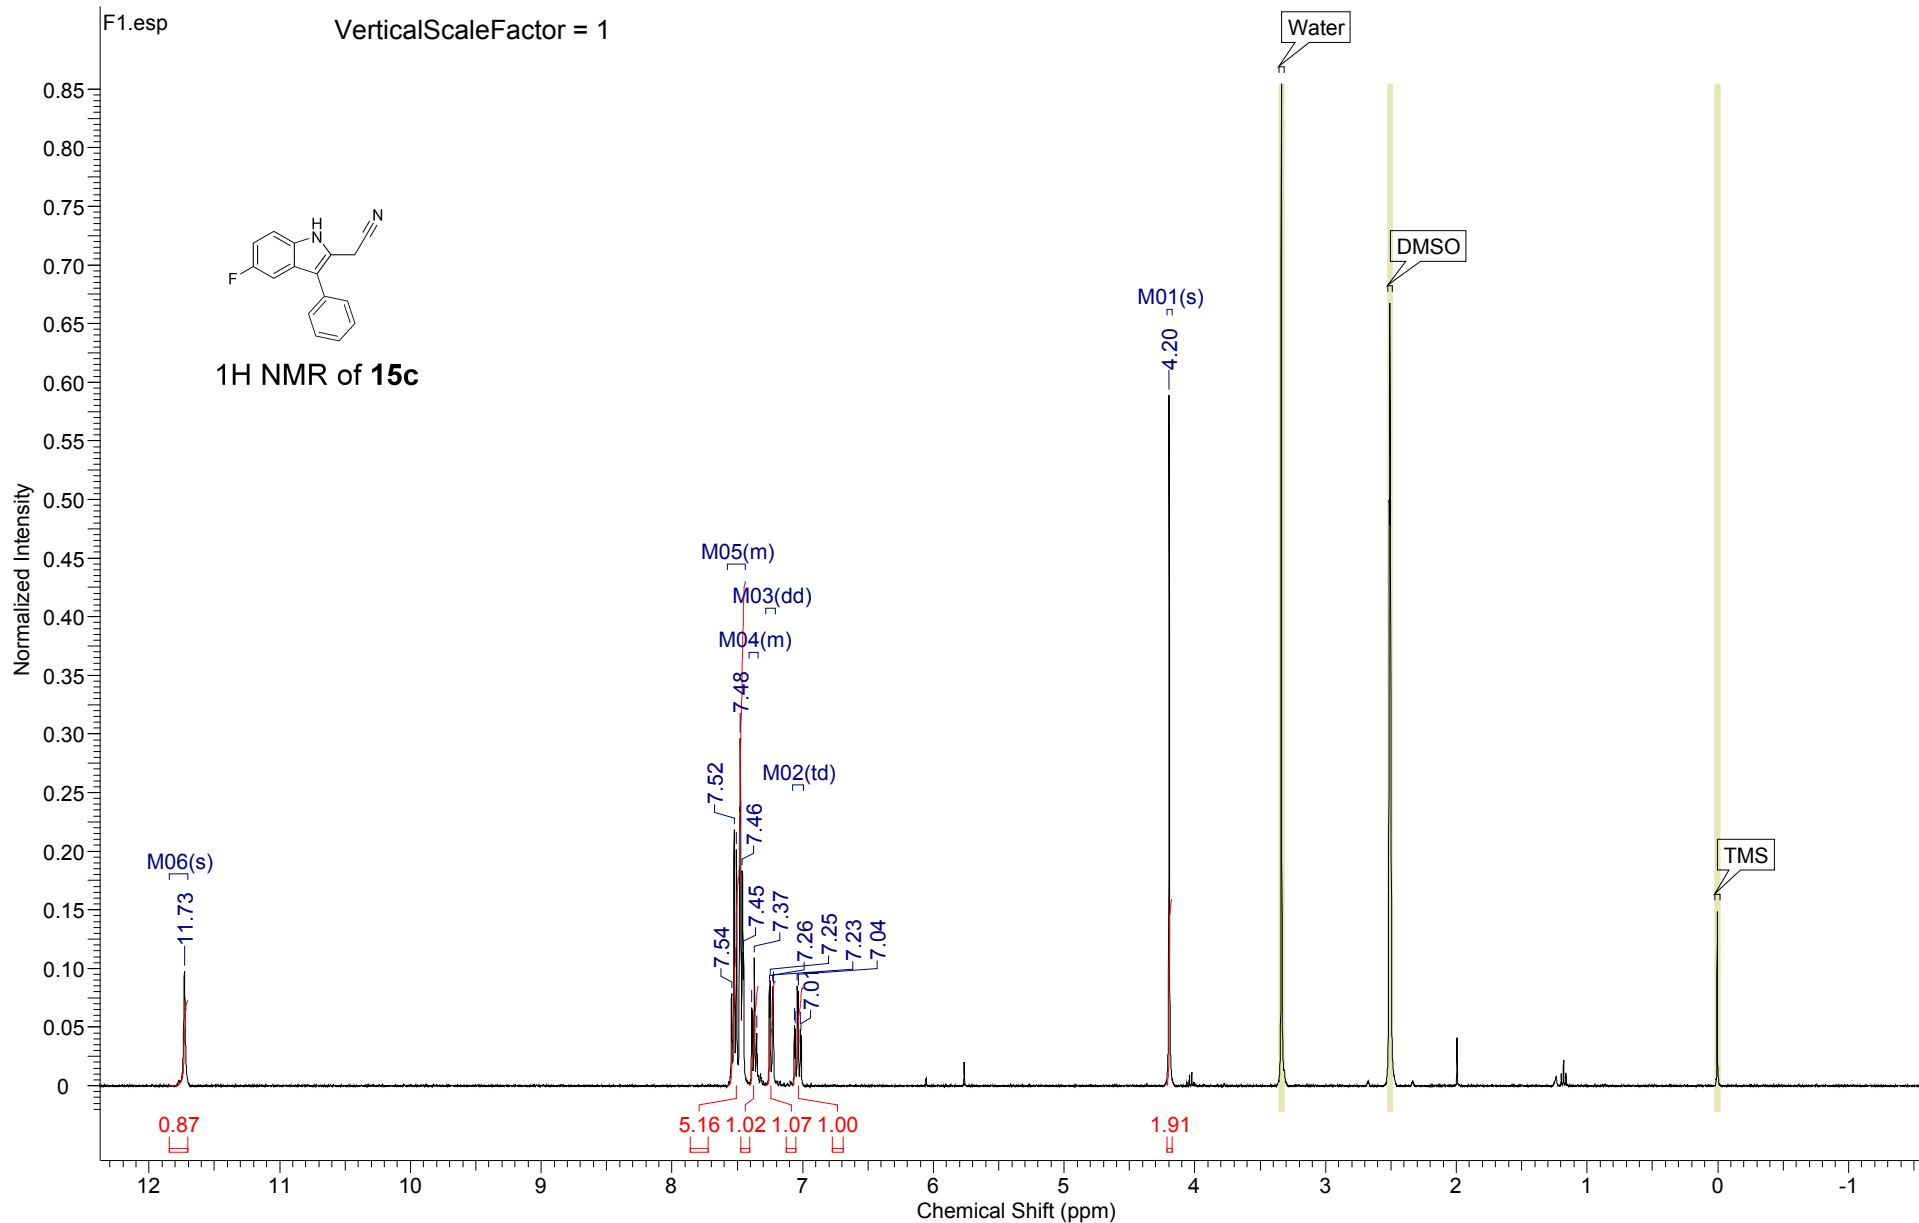

|                        |                              |                      |                      |                       |                      |
|------------------------|------------------------------|----------------------|----------------------|-----------------------|----------------------|
| Acquisition Time (sec) | 1.3631                       | Date                 | 02 Aug 2017 01:51:12 | Date Stamp            | 02 Aug 2017 01:51:12 |
| File Name              | D:\NMR\CJO\CJO-F1\CARBON\fid | Frequency (MHz)      | 100.63               | Nucleus               | 13C                  |
| Number of Transients   | 4000                         | Origin               | spect                | Original Points Count | 32768                |
| Points Count           | 32768                        | Pulse Sequence       | zgpg30               | Receiver Gain         | 196.40               |
| Solvent                | DMSO-d6                      | Spectrum Offset (Hz) | 10061.7803           | Spectrum Type         | STANDARD             |
| Temperature (degree C) | 23.437                       |                      |                      | SW(cyclical) (Hz)     | 24038.46             |
|                        |                              |                      |                      | Sweep Width (Hz)      | 24037.73             |

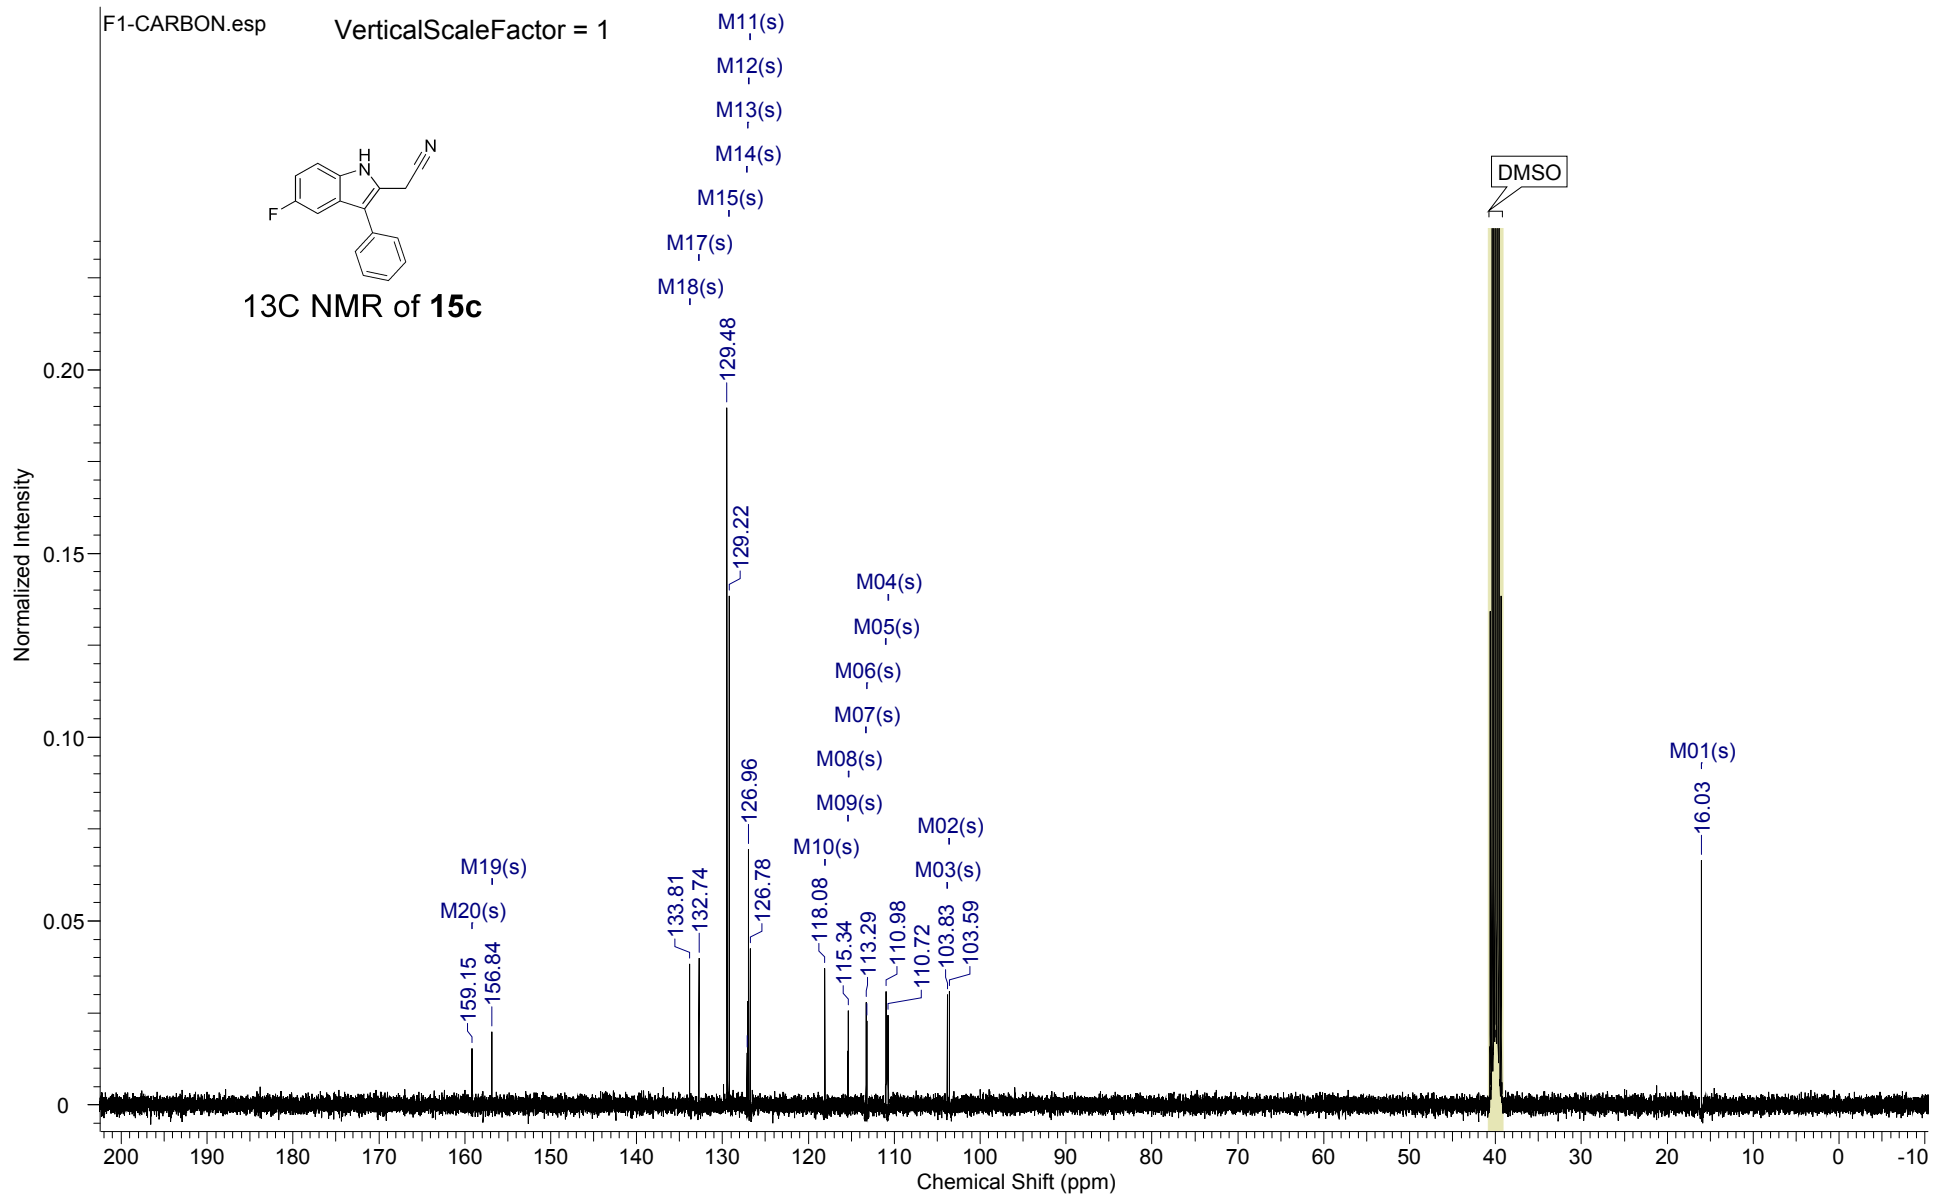



|                               |                             |                               |                      |                |                   |                             |           |
|-------------------------------|-----------------------------|-------------------------------|----------------------|----------------|-------------------|-----------------------------|-----------|
| <b>Acquisition Time (sec)</b> | 4.0894                      | <b>Date</b>                   | 25 Aug 2017 10:40:16 |                | <b>Date Stamp</b> | 25 Aug 2017 10:40:16        |           |
| <b>File Name</b>              | D:\CJO-UCSF\NMR\CJO-J11\fid | <b>Frequency (MHz)</b>        | 400.15               | <b>Nucleus</b> | 1H                | <b>Number of Transients</b> | 32        |
| <b>Origin</b>                 | spect                       | <b>Original Points Count</b>  | 32768                | <b>Owner</b>   | IND-NMR           | <b>Points Count</b>         | 32768     |
| <b>Receiver Gain</b>          | 141.25                      | <b>SW(cyclical) (Hz)</b>      | 8012.82              | <b>Solvent</b> | DMSO-d6           | <b>Spectrum Offset (Hz)</b> | 2470.9260 |
| <b>Sweep Width (Hz)</b>       | 8012.58                     | <b>Temperature (degree C)</b> | 22.636               |                |                   | <b>Spectrum Type</b>        | STANDARD  |

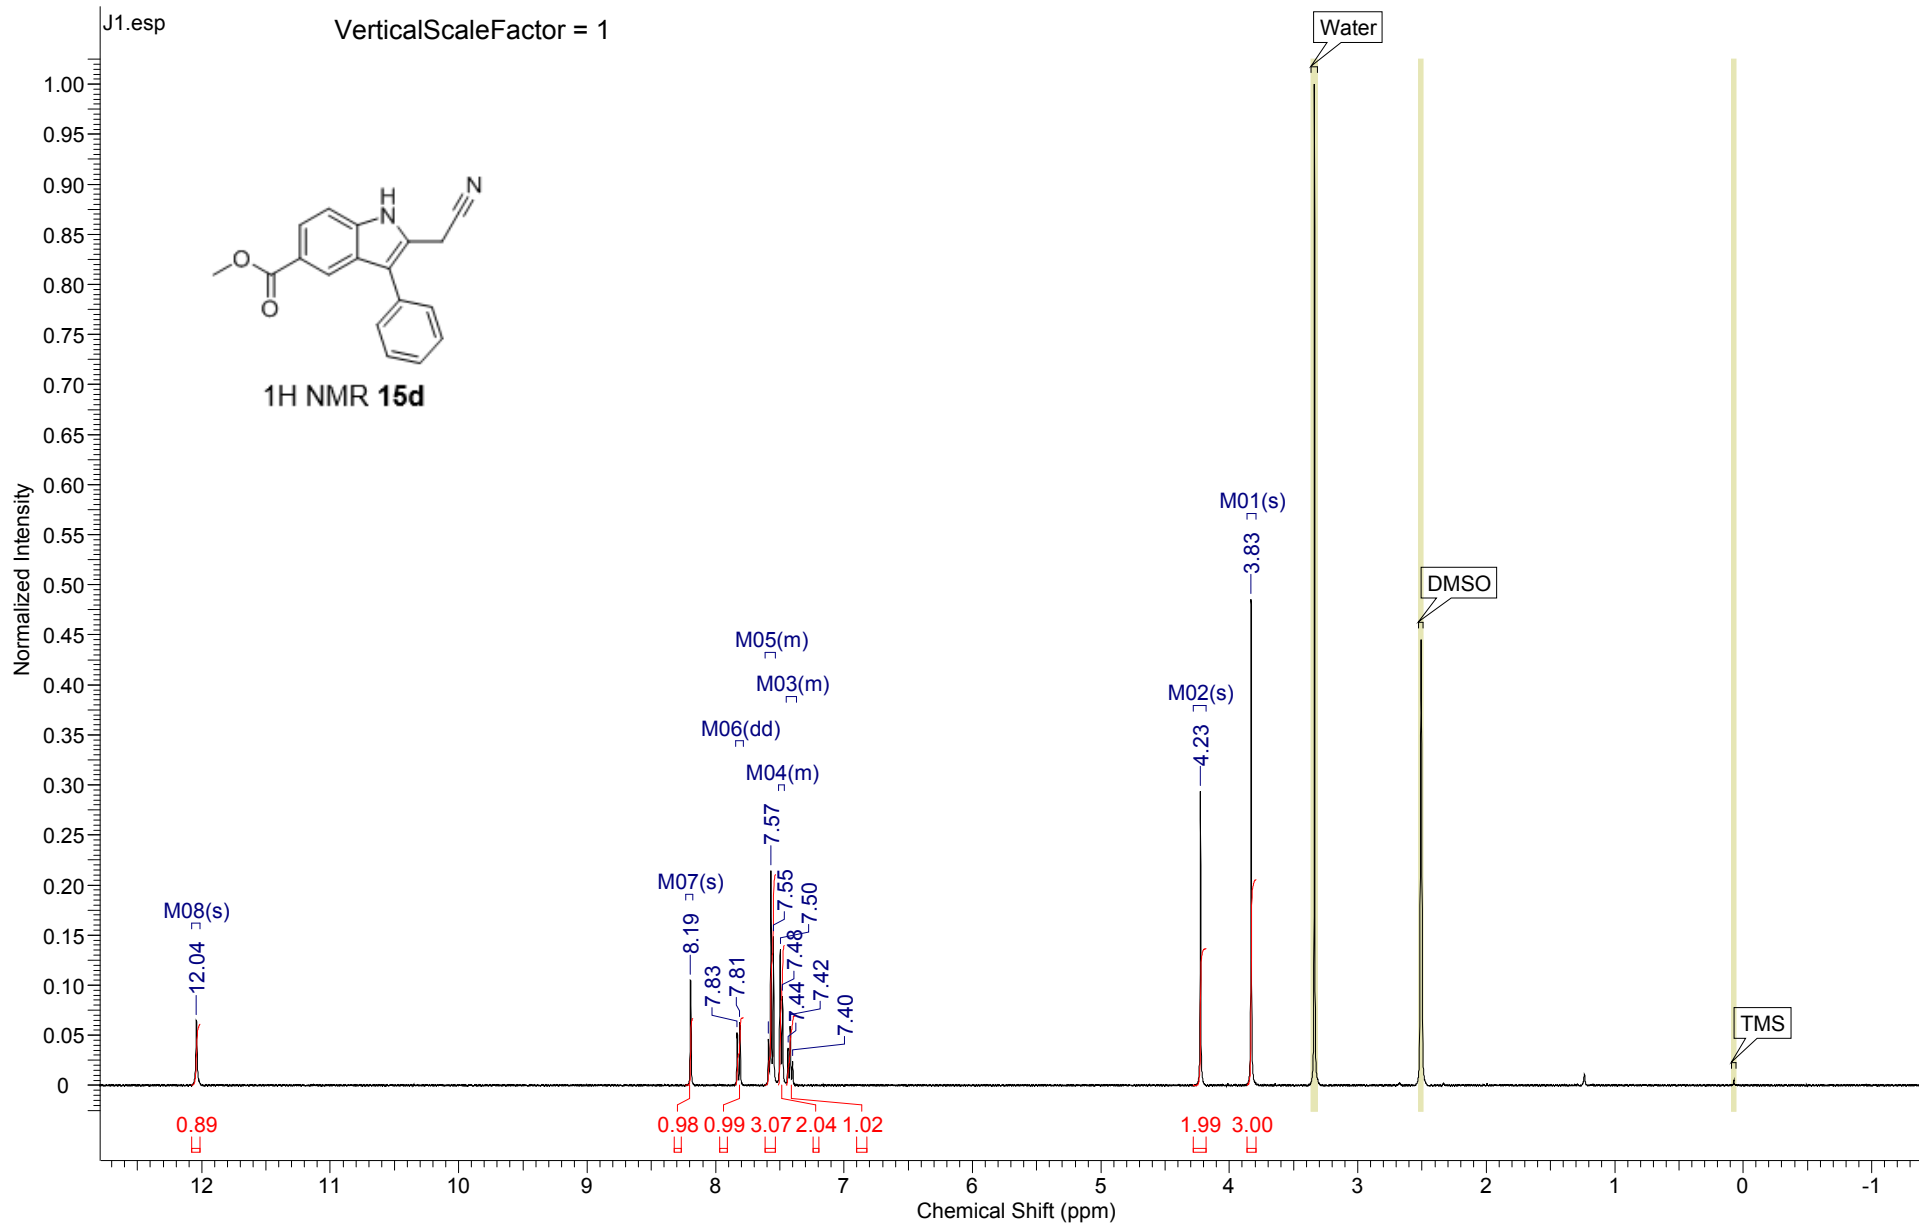

|                        |                                   |                      |                      |                       |                      |
|------------------------|-----------------------------------|----------------------|----------------------|-----------------------|----------------------|
| Acquisition Time (sec) | 1.3631                            | Date                 | 26 Aug 2017 00:55:44 | Date Stamp            | 26 Aug 2017 00:55:44 |
| File Name              | D:\CJO-UCSF\NMR\CJO-J1\CARBON.fid | Frequency (MHz)      | 100.63               | Nucleus               | 13C                  |
| Number of Transients   | 3000                              | Origin               | spect                | Original Points Count | 32768                |
| Points Count           | 32768                             | Pulse Sequence       | zgpg30               | Receiver Gain         | 196.40               |
| Solvent                | DMSO-d6                           | Spectrum Offset (Hz) | 10061.7803           | Spectrum Type         | STANDARD             |
| Temperature (degree C) | 23.395                            | SW(cyclical) (Hz)    |                      | Sweep Width (Hz)      | 24037.73             |

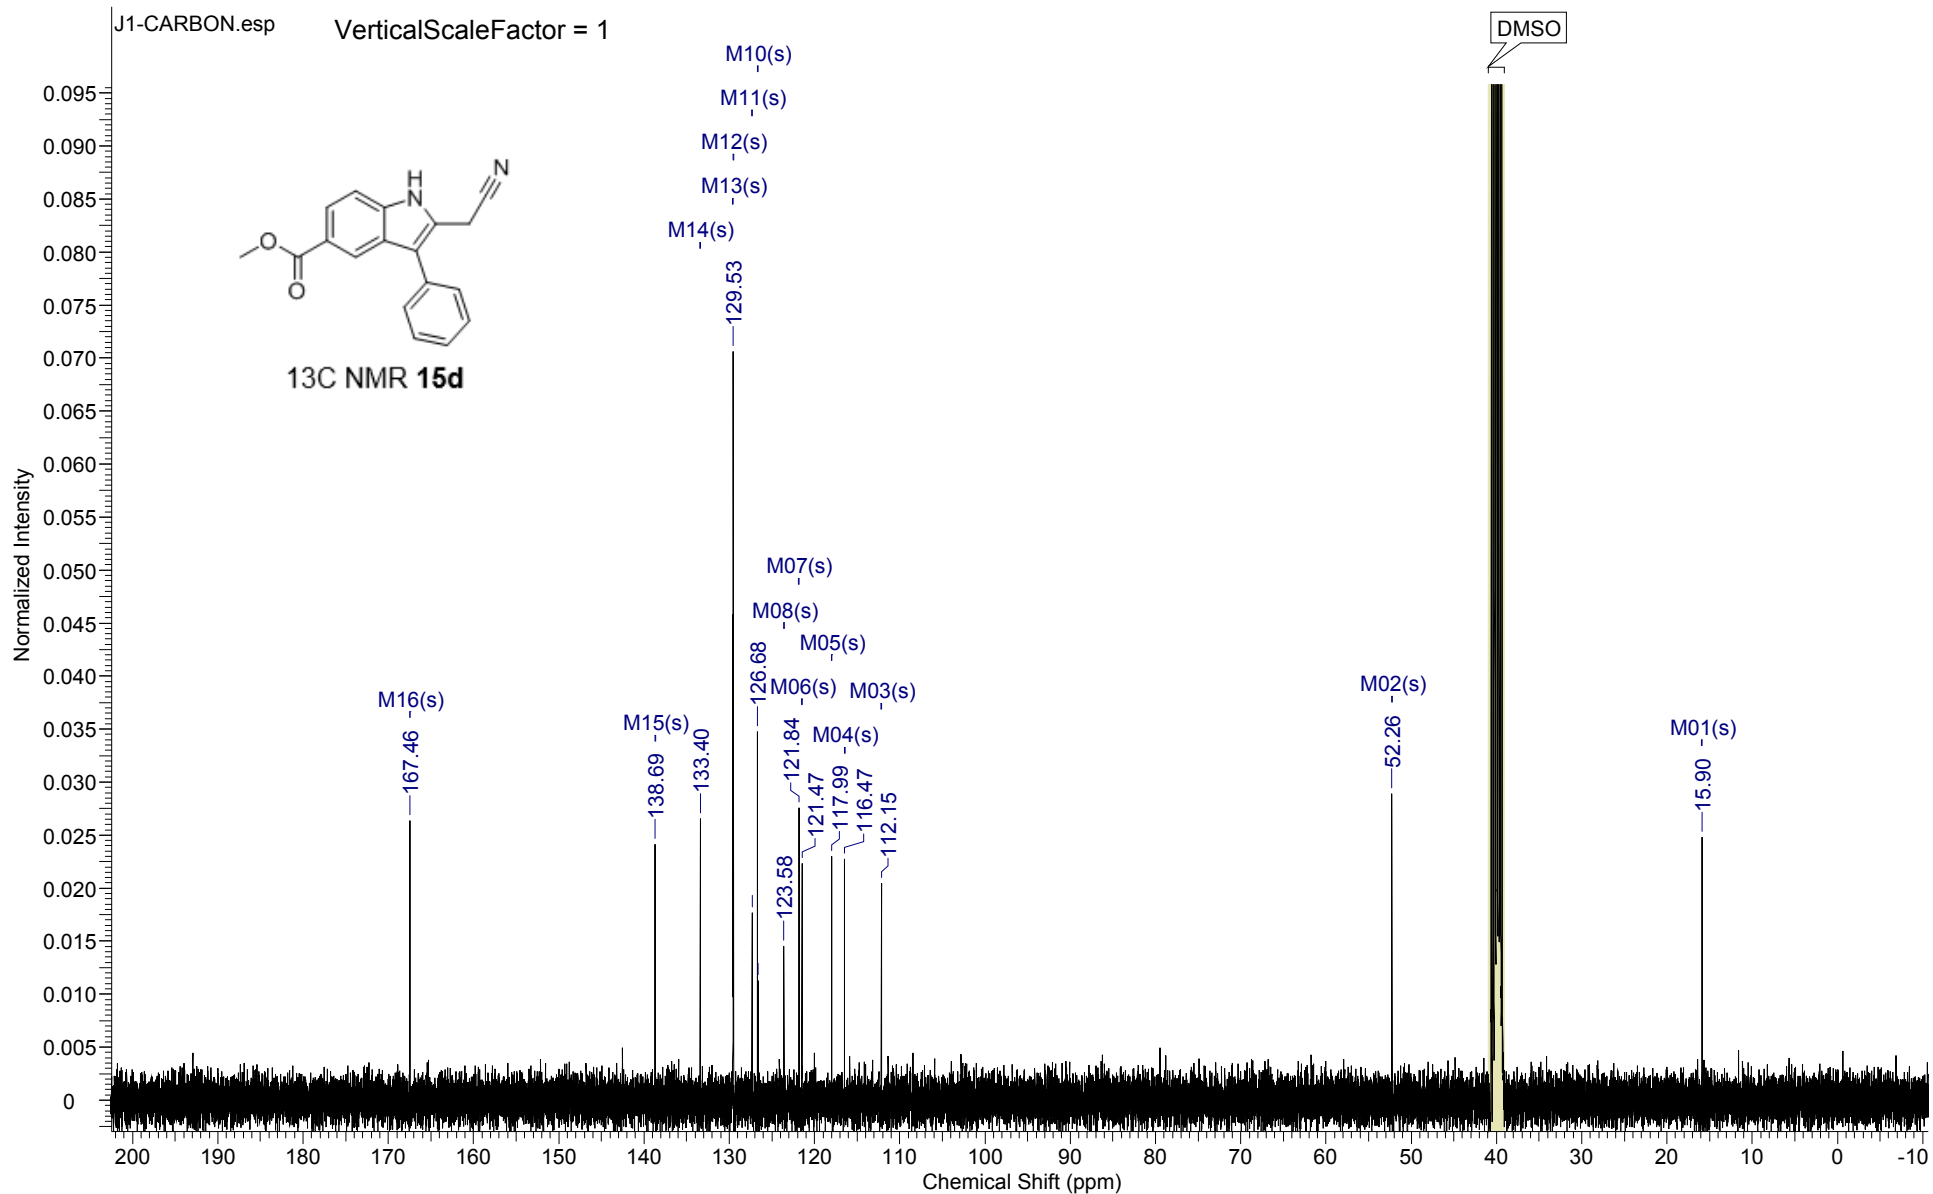

|                               |                              |                               |                      |                      |                      |                             |           |
|-------------------------------|------------------------------|-------------------------------|----------------------|----------------------|----------------------|-----------------------------|-----------|
| <b>Acquisition Time (sec)</b> | 4.0894                       | <b>Date</b>                   | 01 Sep 2017 08:45:04 | <b>Date Stamp</b>    | 01 Sep 2017 08:45:04 |                             |           |
| <b>File Name</b>              | D:\CJO-UCSF\NMR\CJO-K1\2\fid | <b>Frequency (MHz)</b>        | 400.15               | <b>Nucleus</b>       | 1H                   | <b>Number of Transients</b> | 64        |
| <b>Origin</b>                 | spect                        | <b>Original Points Count</b>  | 32768                | <b>Owner</b>         | IND-NMR              | <b>Points Count</b>         | 32768     |
| <b>Receiver Gain</b>          | 125.72                       | <b>SW(cyclical) (Hz)</b>      | 8012.82              | <b>Solvent</b>       | DMSO-d6              | <b>Spectrum Offset (Hz)</b> | 2470.9260 |
| <b>Sweep Width (Hz)</b>       | 8012.58                      | <b>Temperature (degree C)</b> | 22.602               | <b>Spectrum Type</b> | STANDARD             |                             |           |

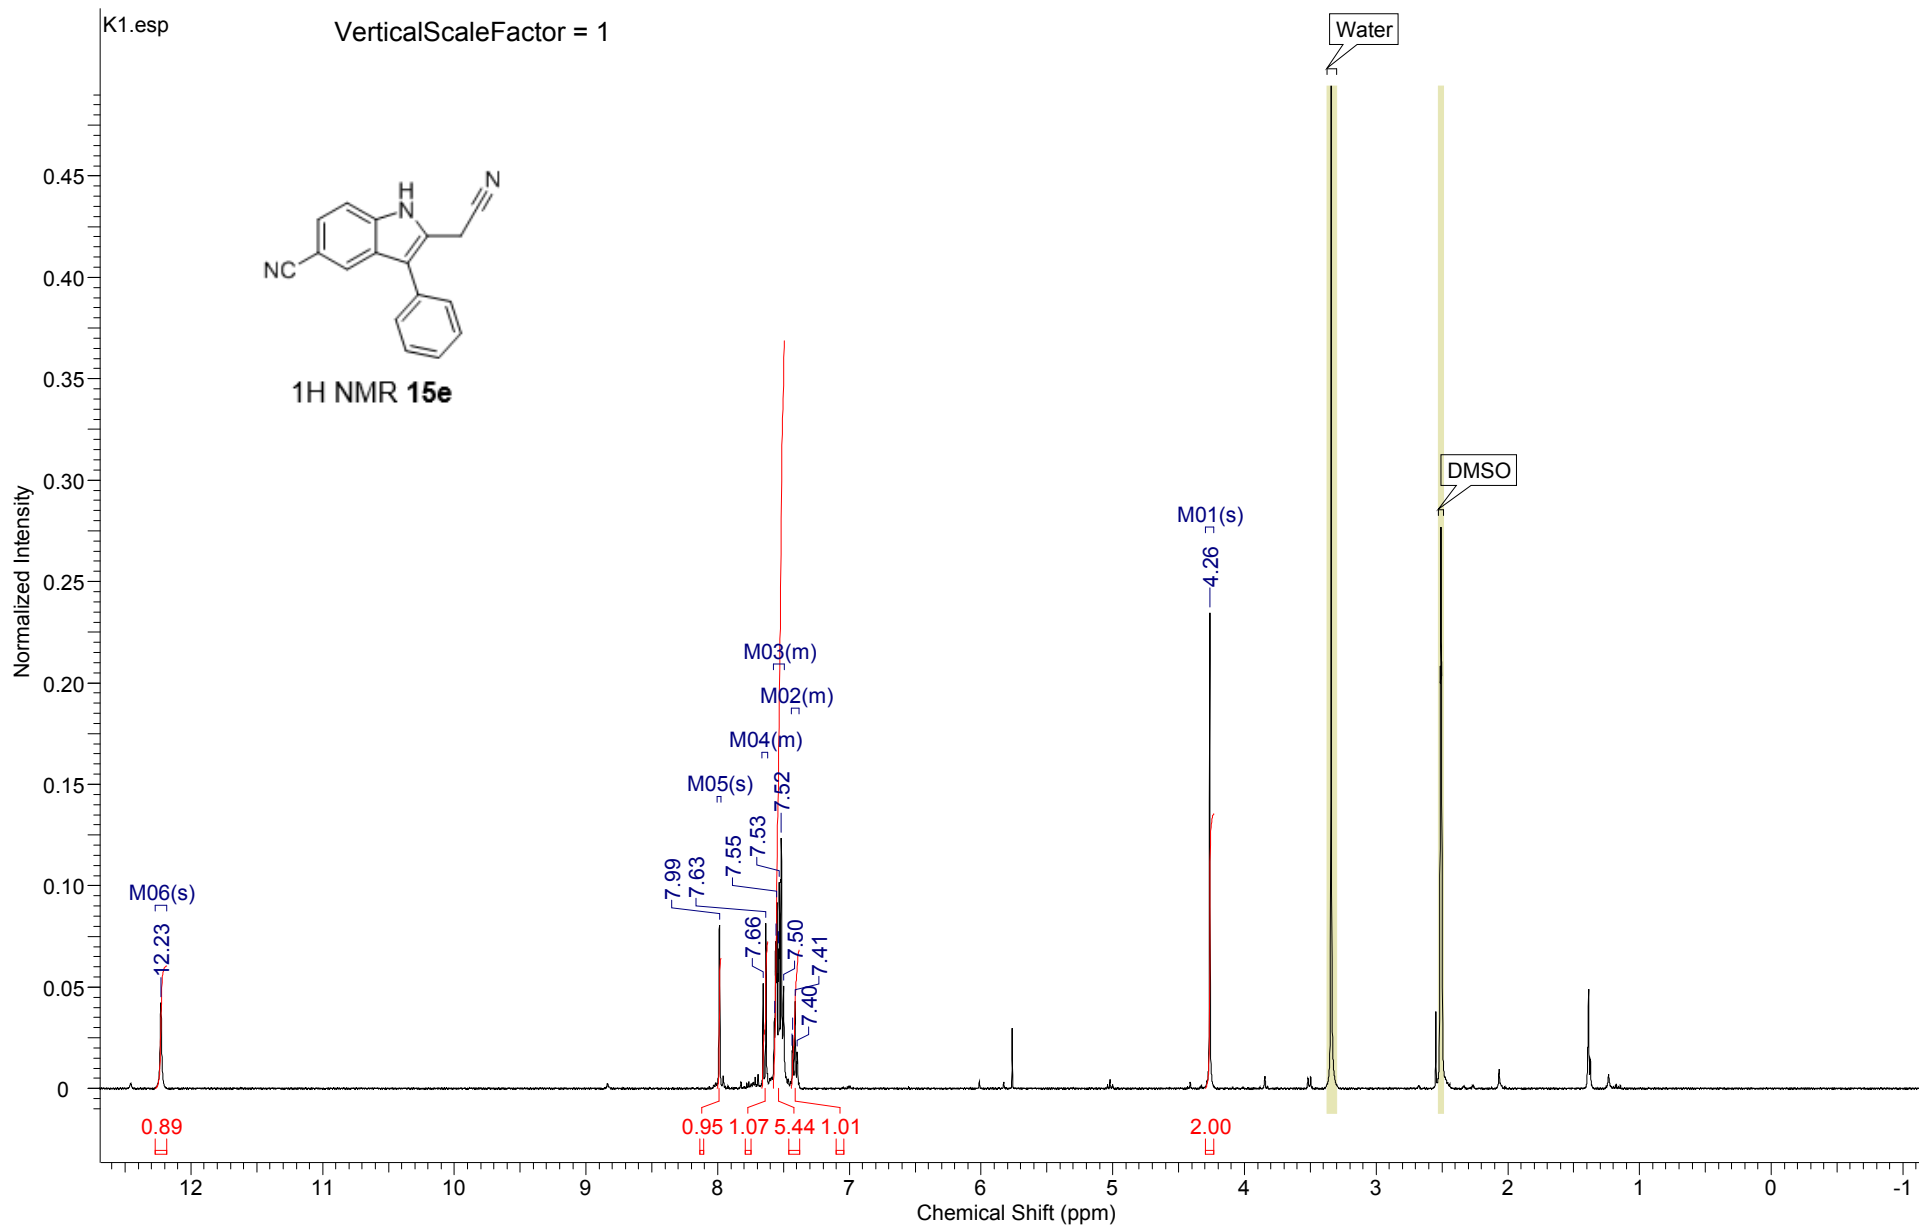

|                               |                                             |                             |                      |                              |                      |
|-------------------------------|---------------------------------------------|-----------------------------|----------------------|------------------------------|----------------------|
| <b>Acquisition Time (sec)</b> | 1.3631                                      | <b>Date</b>                 | 02 Sep 2017 04:48:16 | <b>Date Stamp</b>            | 02 Sep 2017 04:48:16 |
| <b>File Name</b>              | E:\CJO-Indole Project\NMR\CJO-K1\CARBON\fid | <b>Frequency (MHz)</b>      | 100.63               | <b>Nucleus</b>               | 13C                  |
| <b>Number of Transients</b>   | 3000                                        | <b>Origin</b>               | spect                | <b>Original Points Count</b> | 32768                |
| <b>Points Count</b>           | 32768                                       | <b>Pulse Sequence</b>       | zpgg30               | <b>Receiver Gain</b>         | 196.40               |
| <b>Solvent</b>                | DMSO-d6                                     | <b>Spectrum Offset (Hz)</b> | 10061.7803           | <b>Spectrum Type</b>         | STANDARD             |
| <b>Temperature (degree C)</b> | 23.487                                      |                             |                      | <b>SW(cyclical) (Hz)</b>     | 24038.46             |
|                               |                                             |                             |                      | <b>Sweep Width (Hz)</b>      | 24037.73             |

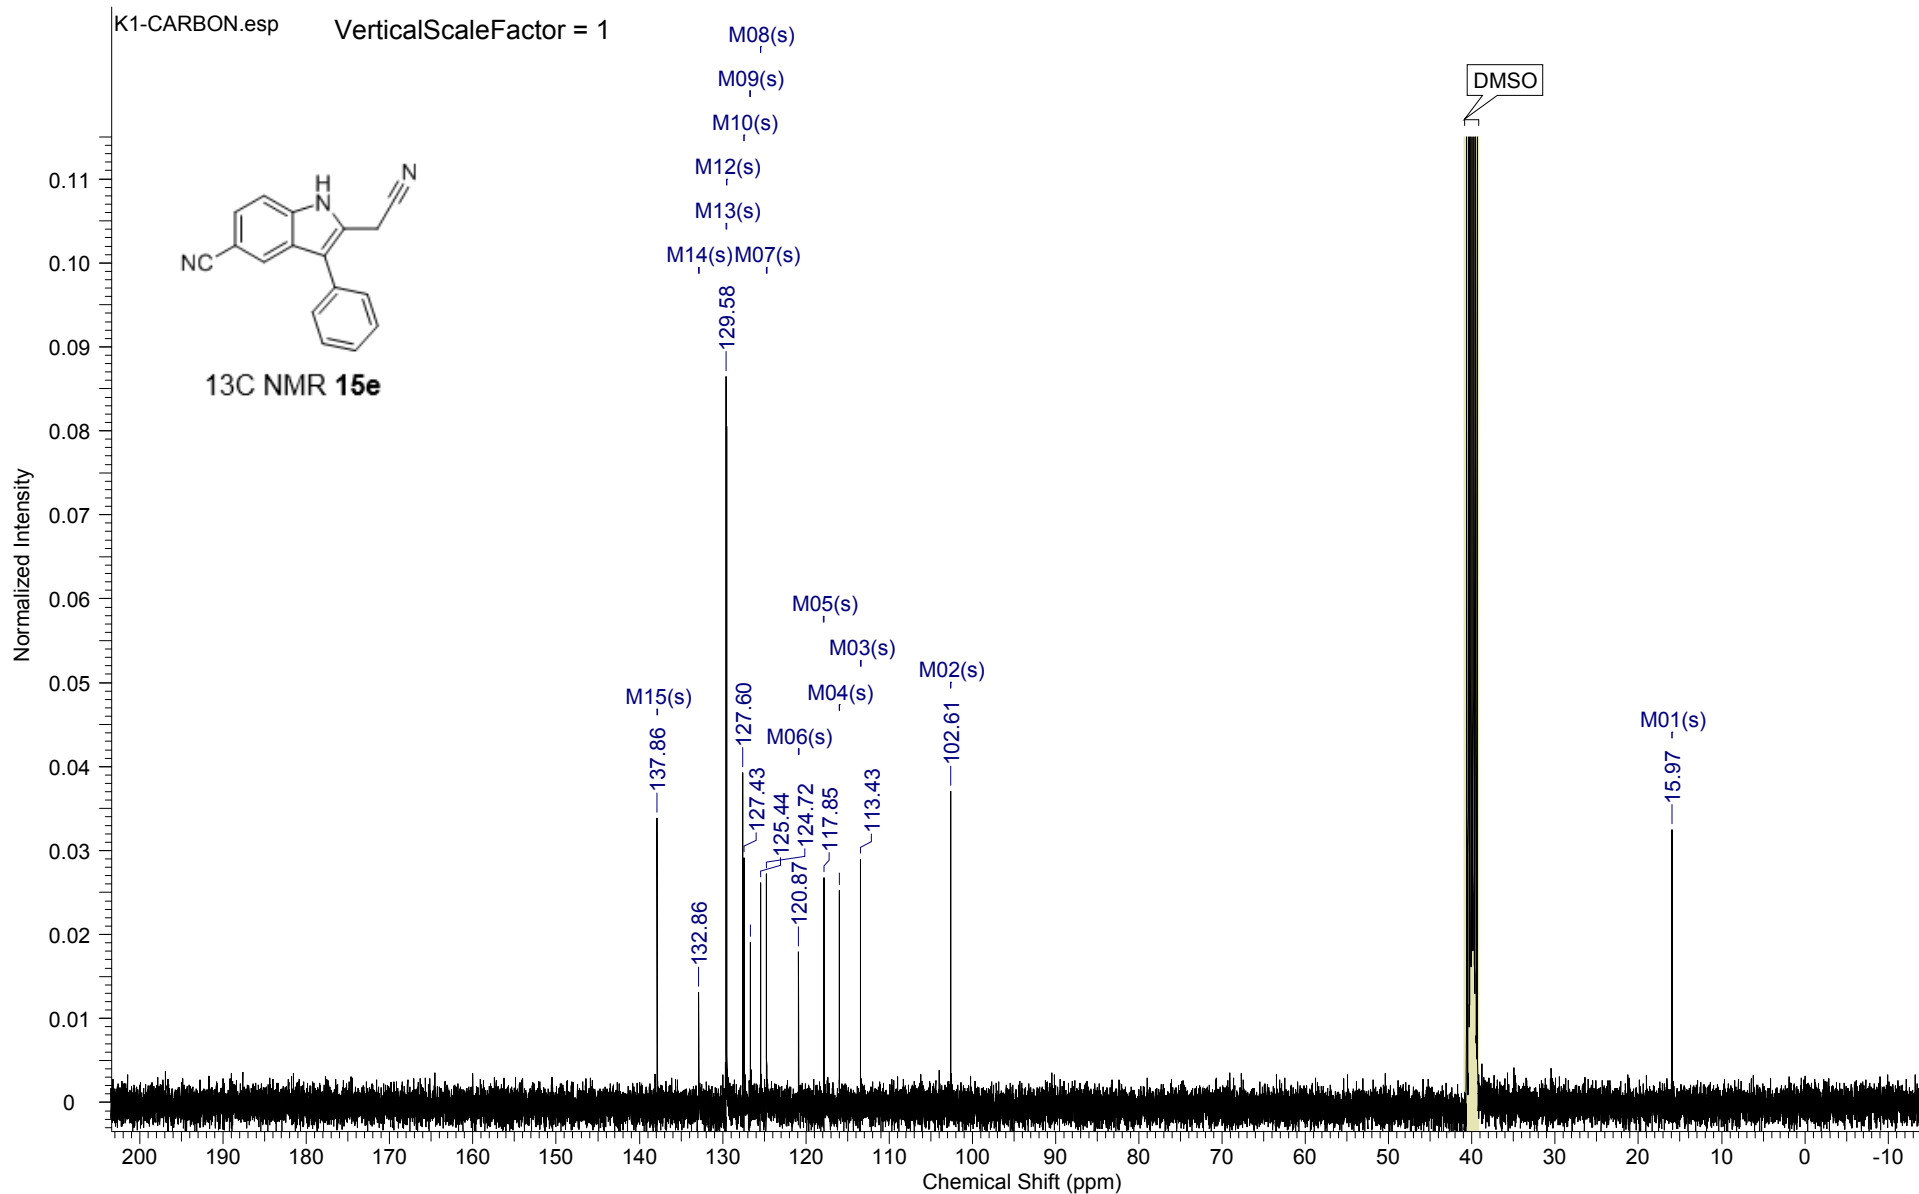

|                               |                          |                               |                      |                   |                      |                             |           |
|-------------------------------|--------------------------|-------------------------------|----------------------|-------------------|----------------------|-----------------------------|-----------|
| <b>Acquisition Time (sec)</b> | 4.0894                   | <b>Date</b>                   | 09 Aug 2017 09:08:32 | <b>Date Stamp</b> | 09 Aug 2017 09:08:32 |                             |           |
| <b>File Name</b>              | D:\CJO-UCSF\CJO-L1\1\fid | <b>Frequency (MHz)</b>        | 400.15               | <b>Nucleus</b>    | 1H                   | <b>Number of Transients</b> | 32        |
| <b>Origin</b>                 | spect                    | <b>Original Points Count</b>  | 32768                | <b>Owner</b>      | IND-NMR              | <b>Points Count</b>         | 32768     |
| <b>Receiver Gain</b>          | 97.12                    | <b>SW(cyclical) (Hz)</b>      | 8012.82              | <b>Solvent</b>    | DMSO-d6              | <b>Spectrum Offset (Hz)</b> | 2470.9260 |
| <b>Sweep Width (Hz)</b>       | 8012.58                  | <b>Temperature (degree C)</b> | 22.855               |                   |                      | <b>Spectrum Type</b>        | STANDARD  |

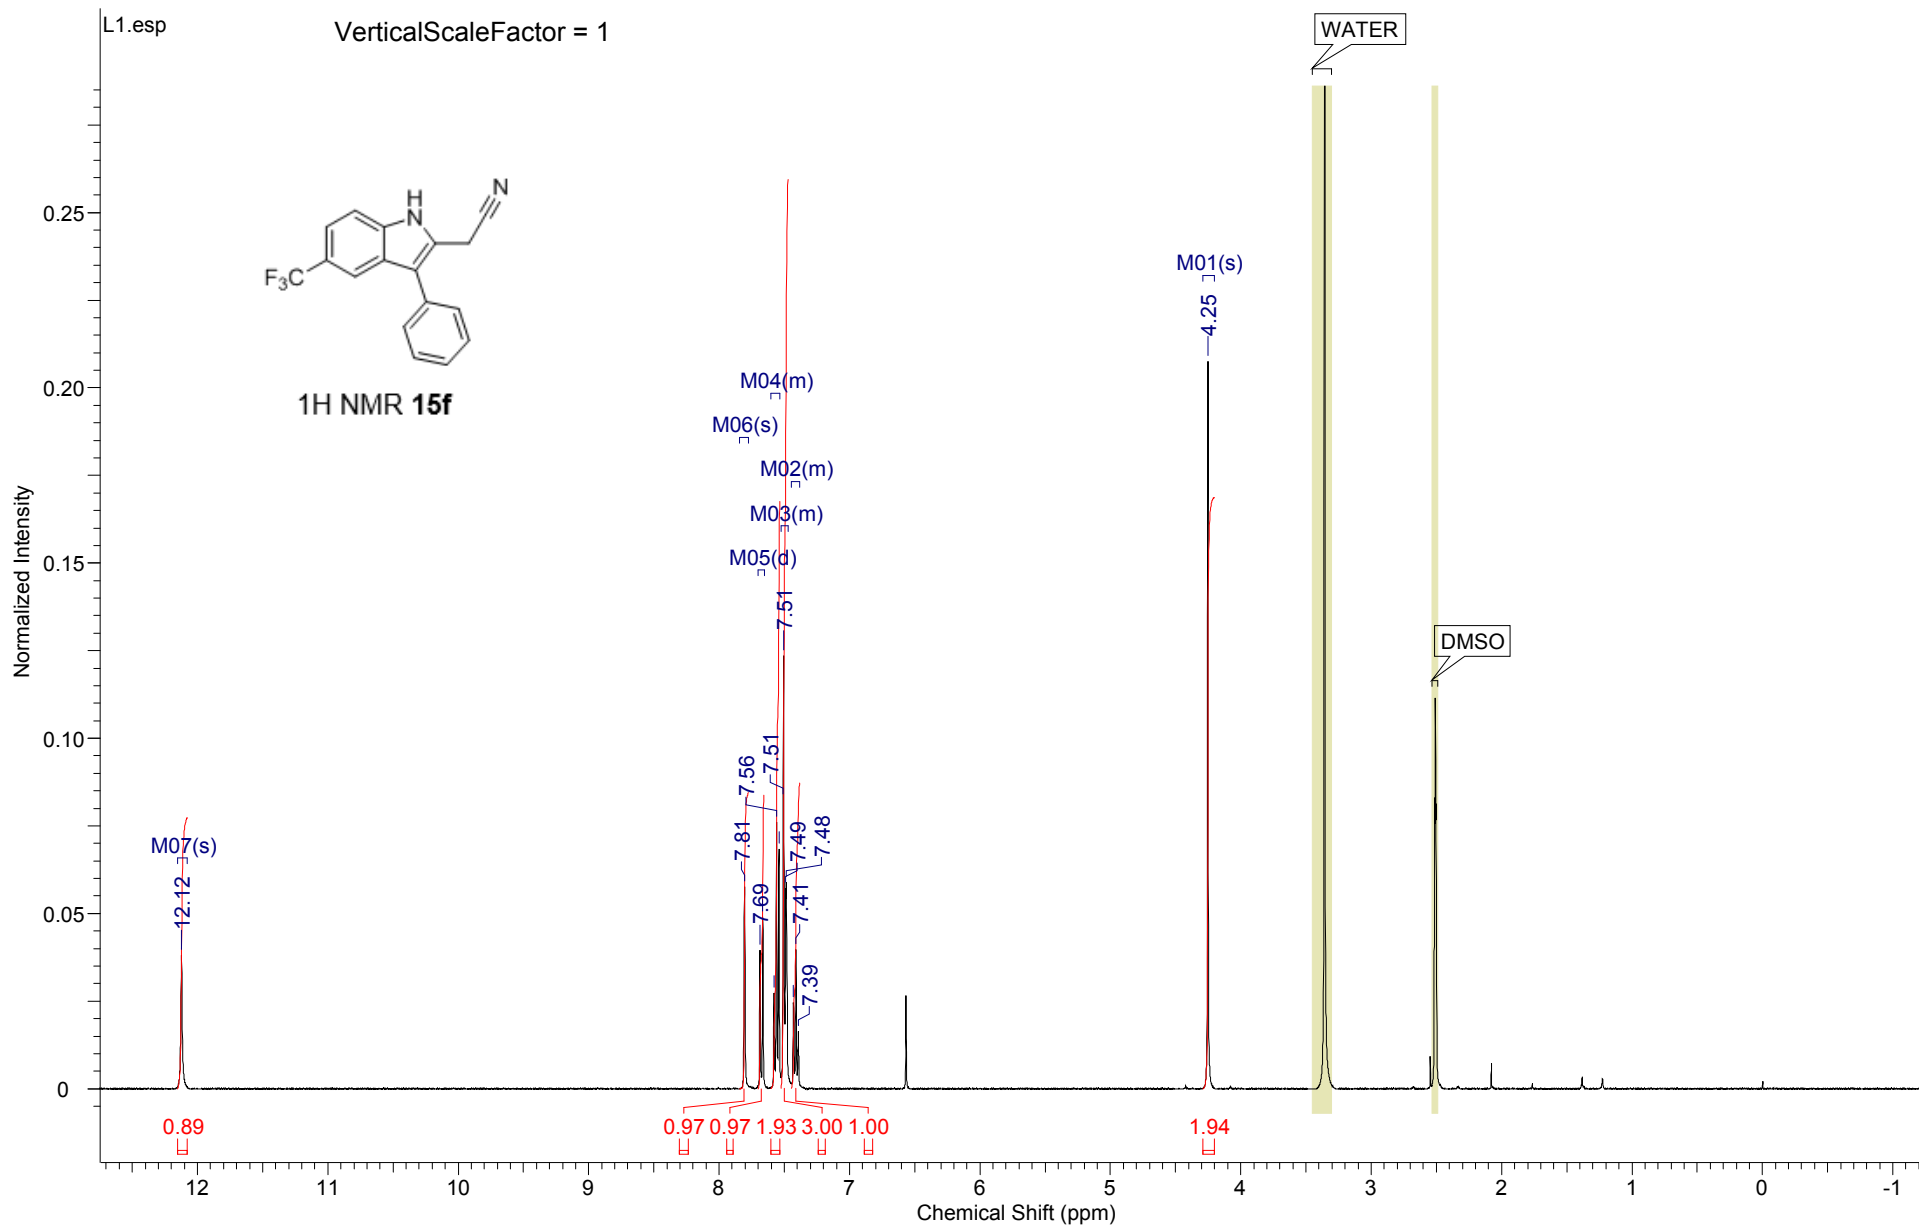

|                        |                                   |                      |                      |                       |                      |
|------------------------|-----------------------------------|----------------------|----------------------|-----------------------|----------------------|
| Acquisition Time (sec) | 1.3631                            | Date                 | 10 Aug 2017 00:55:44 | Date Stamp            | 10 Aug 2017 00:55:44 |
| File Name              | D:\CJO-UCSF\NMR\CJO-L1\CARBON\fid | Frequency (MHz)      | 100.63               | Nucleus               | 13C                  |
| Number of Transients   | 3000                              | Origin               | spect                | Original Points Count | 32768                |
| Points Count           | 32768                             | Pulse Sequence       | zpgpg30              | Receiver Gain         | 196.40               |
| Solvent                | DMSO-d6                           | Spectrum Offset (Hz) | 10061.7803           | Spectrum Type         | STANDARD             |
| Temperature (degree C) | 23.169                            | SW(cyclical) (Hz)    |                      | Sweep Width (Hz)      | 24037.73             |

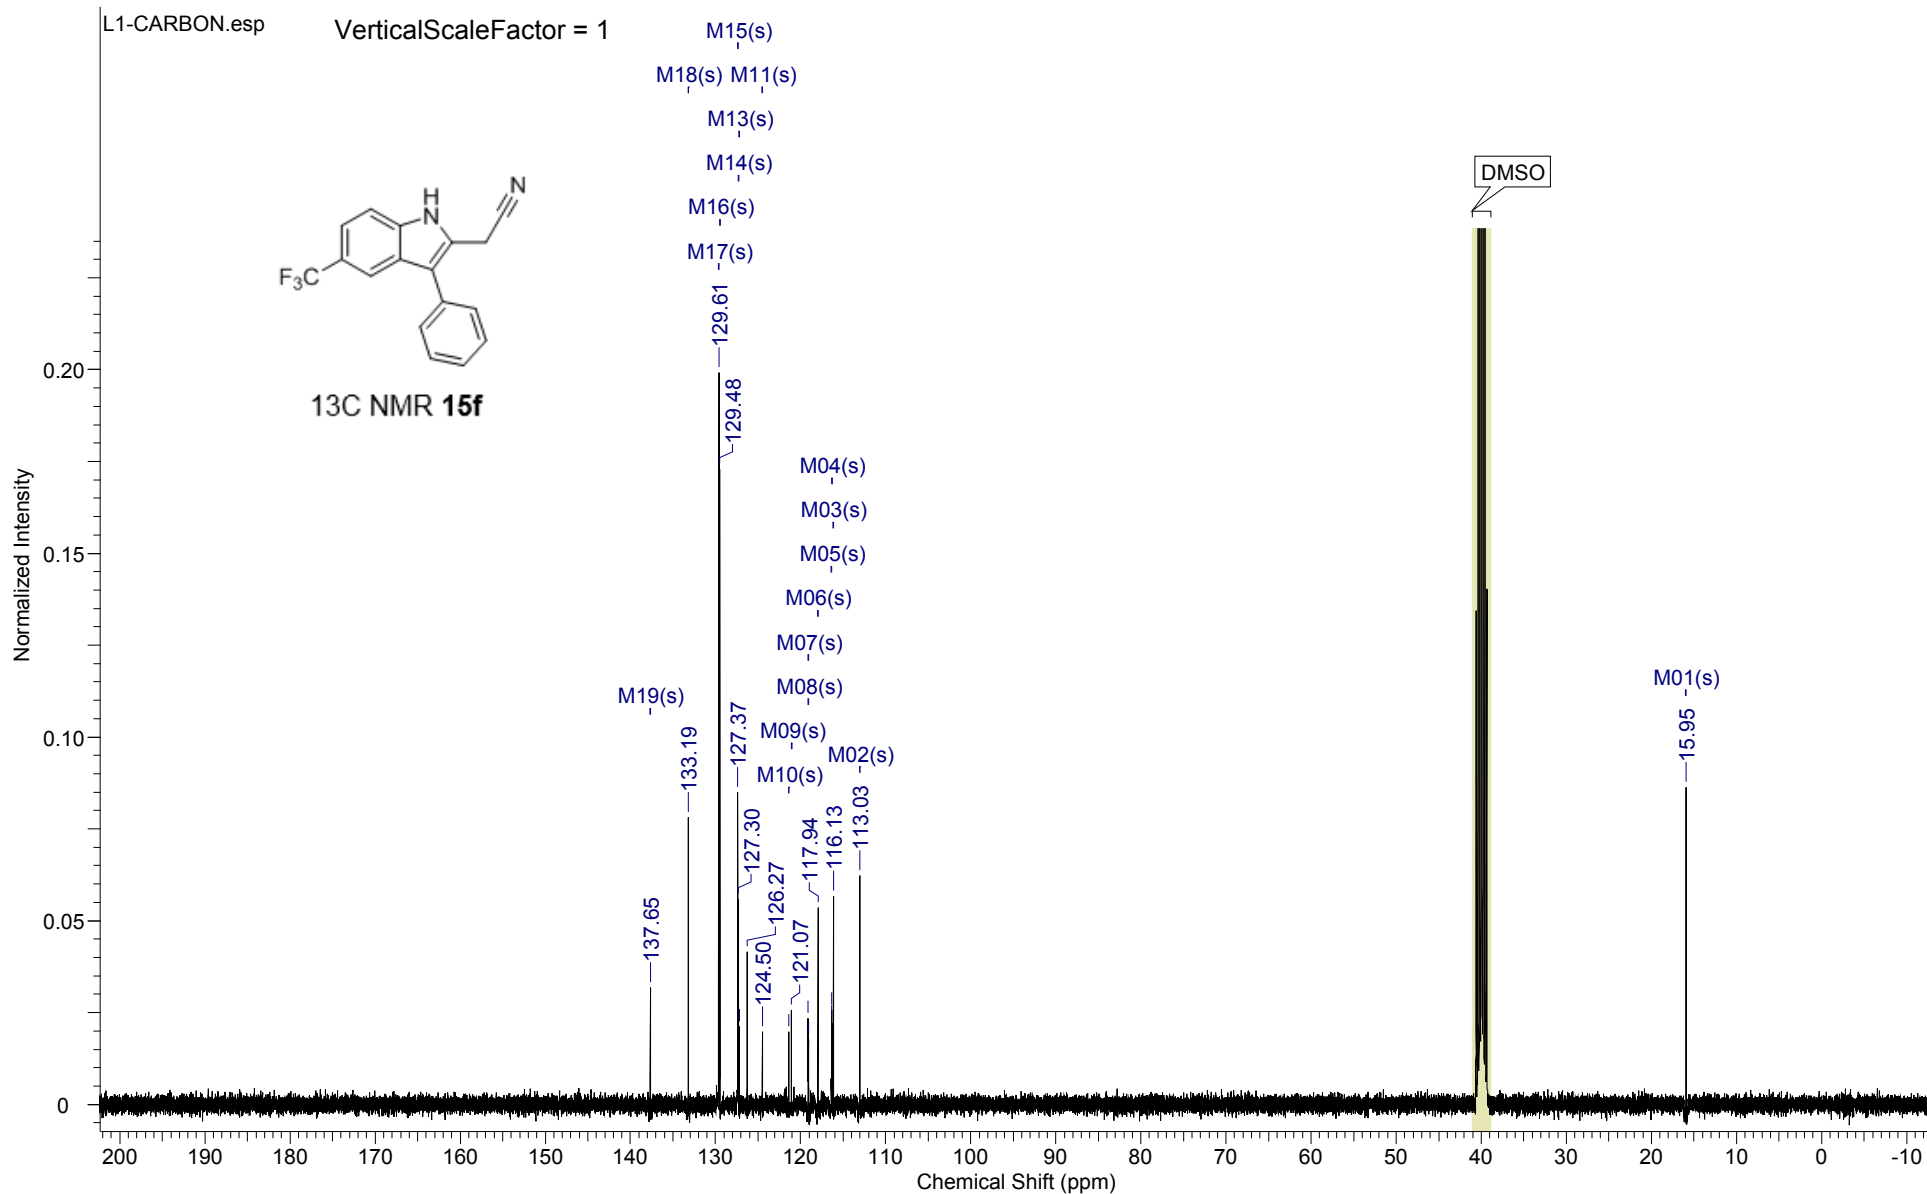

|                        |                              |                        |                      |                      |                      |
|------------------------|------------------------------|------------------------|----------------------|----------------------|----------------------|
| Acquisition Time (sec) | 4.0894                       | Date                   | 29 Aug 2017 08:25:52 | Date Stamp           | 29 Aug 2017 08:25:52 |
| File Name              | D:\CJO-UCSF\NMR\CJO-E1\6\fid | Frequency (MHz)        | 400.15               | Nucleus              | <sup>1</sup> H       |
| Origin                 | spect                        | Original Points Count  | 32768                | Owner                | IND-NMR              |
| Receiver Gain          | 141.25                       | SW(cyclical) (Hz)      | 8012.82              | Points Count         | 32768                |
| Sweep Width (Hz)       | 8012.58                      | Temperature (degree C) | 22.786               | Solvent              | DMSO-d6              |
|                        |                              |                        |                      | Spectrum Offset (Hz) | 2470.9260            |
|                        |                              |                        |                      | Spectrum Type        | STANDARD             |

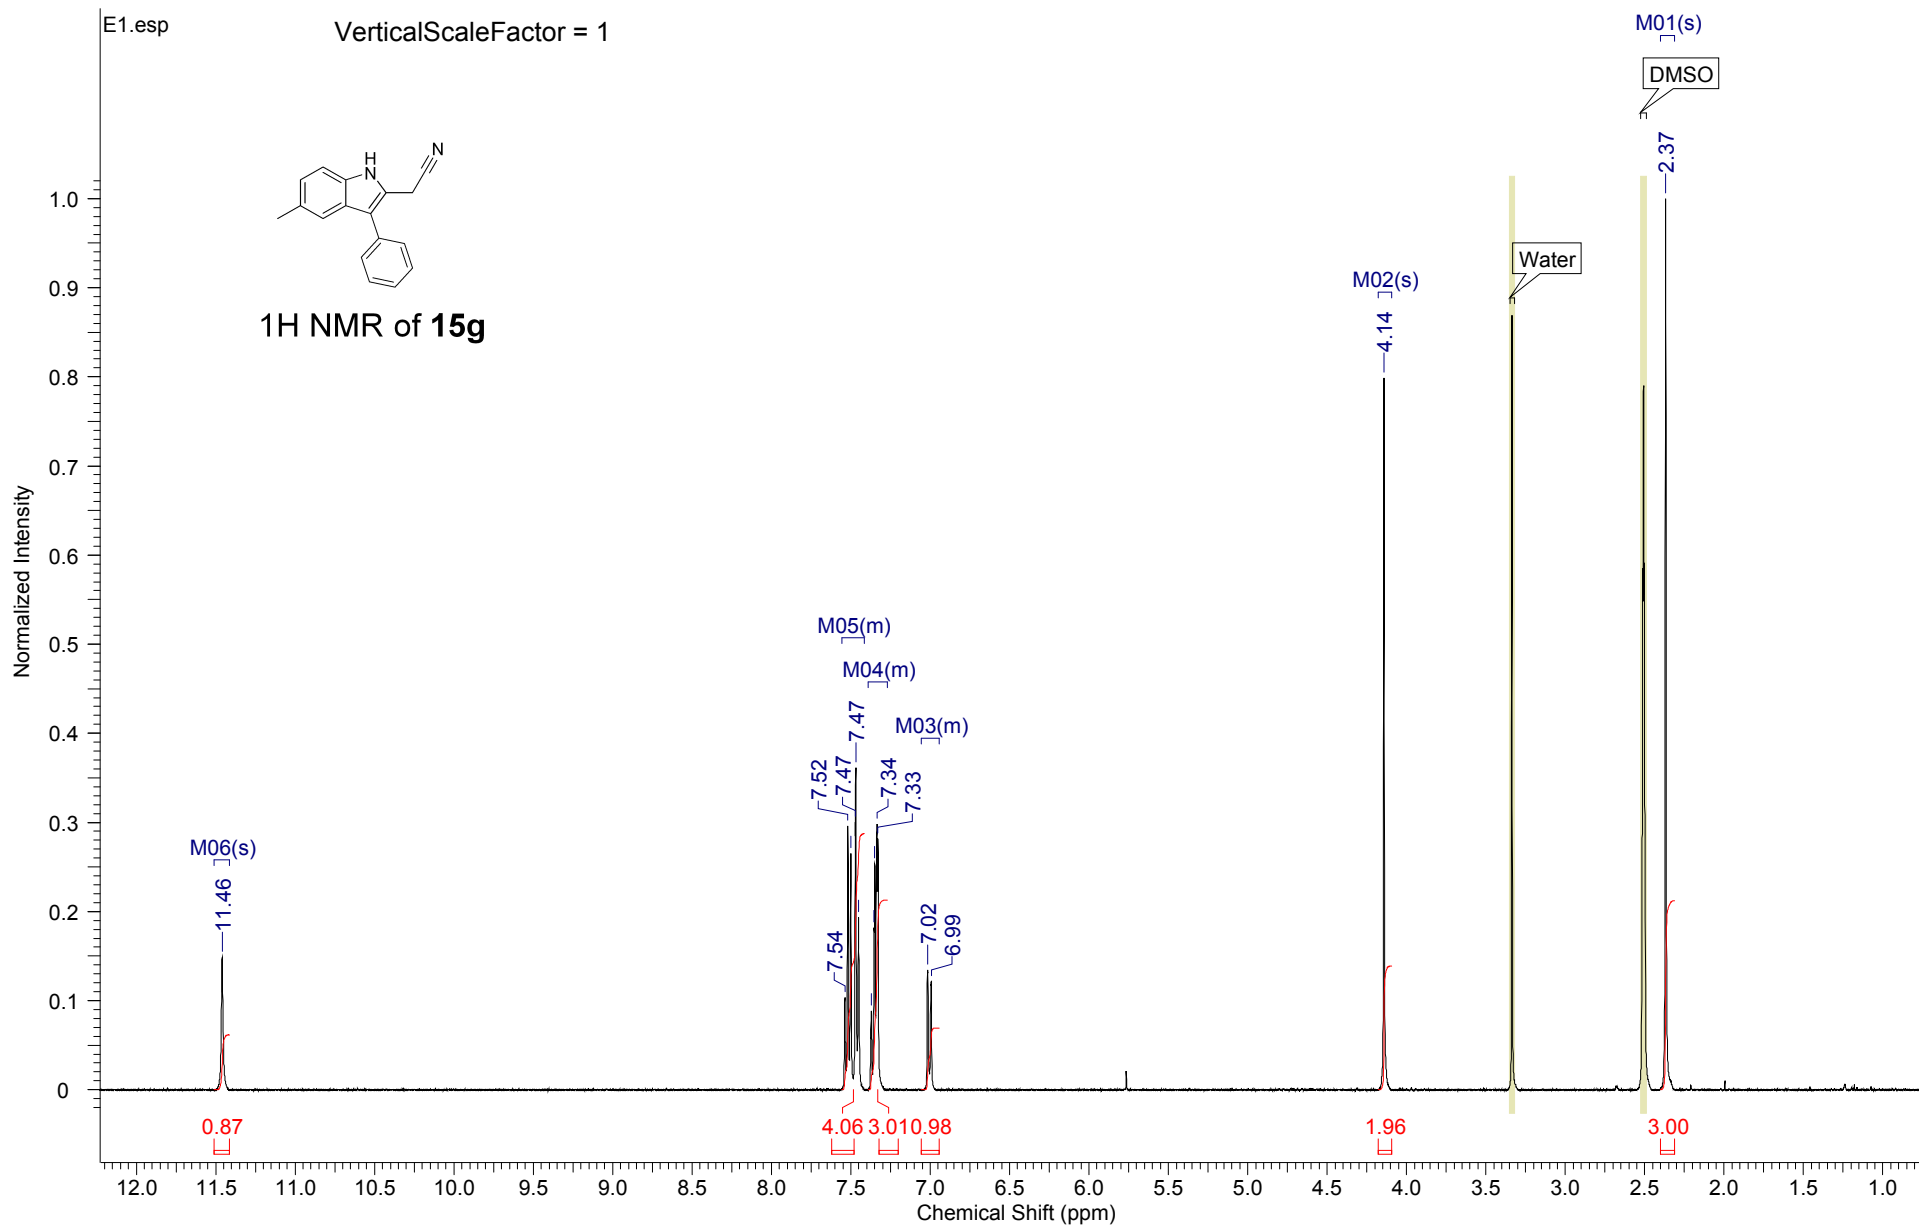

|                        |                                   |                      |                      |                       |                      |
|------------------------|-----------------------------------|----------------------|----------------------|-----------------------|----------------------|
| Acquisition Time (sec) | 1.3631                            | Date                 | 01 Sep 2017 06:13:36 | Date Stamp            | 01 Sep 2017 06:13:36 |
| File Name              | D:\CJO-UCSF\NMR\CJO-E1\CARBON\fid | Frequency (MHz)      | 100.63               | Nucleus               | 13C                  |
| Number of Transients   | 2000                              | Origin               | spect                | Original Points Count | 32768                |
| Points Count           | 32768                             | Pulse Sequence       | zgpg30               | Receiver Gain         | 196.40               |
| Solvent                | DMSO-d6                           | Spectrum Offset (Hz) | 10061.7803           | Spectrum Type         | STANDARD             |
| Temperature (degree C) | 23.511                            | SW(cyclical) (Hz)    |                      | Sweep Width (Hz)      | 24037.73             |

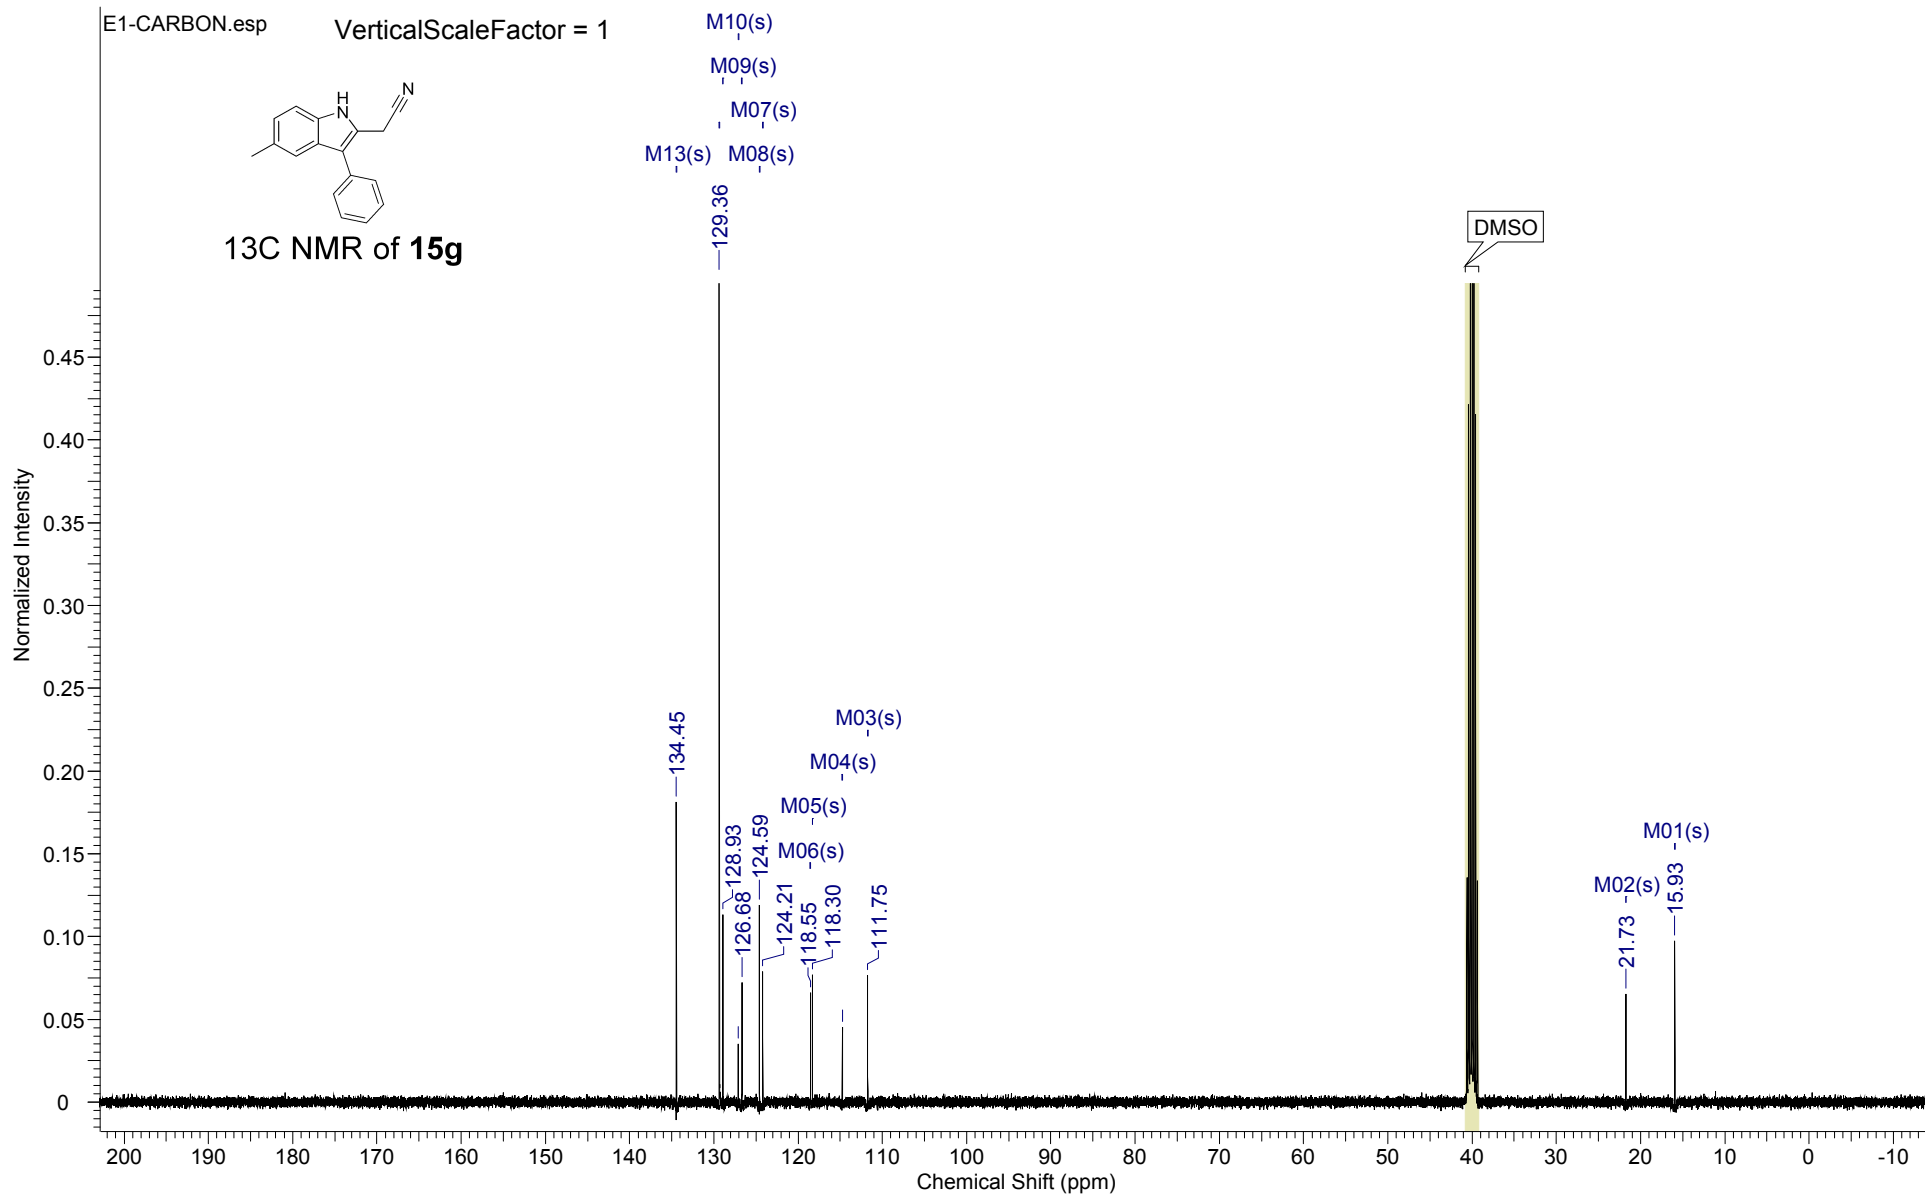



|                               |                              |                               |                      |                      |                      |                             |           |
|-------------------------------|------------------------------|-------------------------------|----------------------|----------------------|----------------------|-----------------------------|-----------|
| <b>Acquisition Time (sec)</b> | 4.0894                       | <b>Date</b>                   | 11 Aug 2017 09:08:32 | <b>Date Stamp</b>    | 11 Aug 2017 09:08:32 |                             |           |
| <b>File Name</b>              | D:\CJO-UCSF\NMR\CJO-I1\1\fid | <b>Frequency (MHz)</b>        | 400.15               | <b>Nucleus</b>       | 1H                   | <b>Number of Transients</b> | 32        |
| <b>Origin</b>                 | spect                        | <b>Original Points Count</b>  | 32768                | <b>Owner</b>         | IND-NMR              | <b>Points Count</b>         | 32768     |
| <b>Receiver Gain</b>          | 125.72                       | <b>SW(cyclical) (Hz)</b>      | 8012.82              | <b>Solvent</b>       | DMSO-d6              | <b>Spectrum Offset (Hz)</b> | 2470.9260 |
| <b>Sweep Width (Hz)</b>       | 8012.58                      | <b>Temperature (degree C)</b> | 22.667               | <b>Spectrum Type</b> | STANDARD             |                             |           |

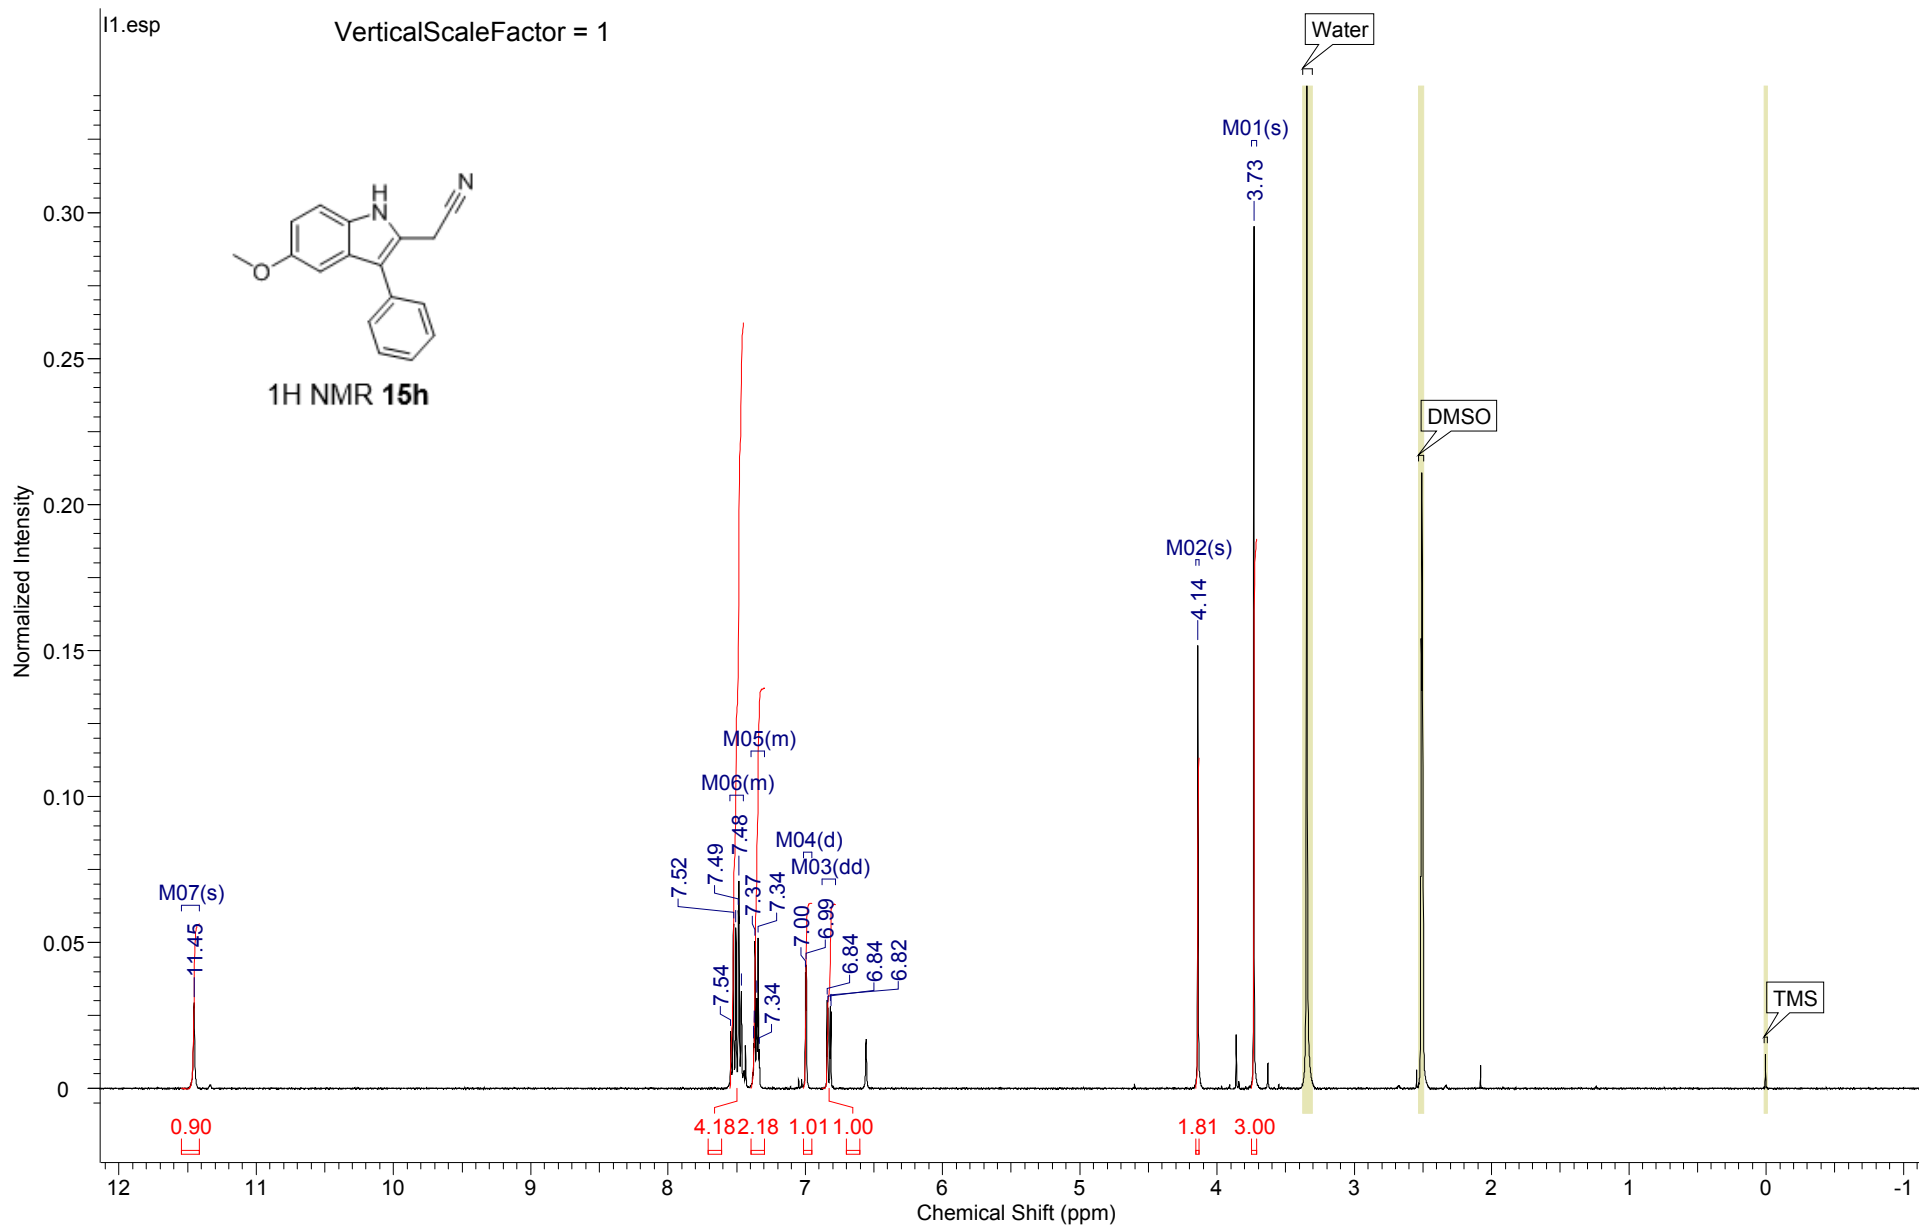

|                               |                              |                             |                      |                              |                      |
|-------------------------------|------------------------------|-----------------------------|----------------------|------------------------------|----------------------|
| <b>Acquisition Time (sec)</b> | 1.3631                       | <b>Date</b>                 | 12 Aug 2017 03:48:32 | <b>Date Stamp</b>            | 12 Aug 2017 03:48:32 |
| <b>File Name</b>              | D:\CJO-UCSF\NMR\CJO-I1\2\fid | <b>Frequency (MHz)</b>      | 100.63               | <b>Nucleus</b>               | 13C                  |
| <b>Number of Transients</b>   | 3000                         | <b>Origin</b>               | spect                | <b>Original Points Count</b> | 32768                |
| <b>Points Count</b>           | 32768                        | <b>Pulse Sequence</b>       | zgpg30               | <b>Receiver Gain</b>         | 196.40               |
| <b>Solvent</b>                | DMSO-d6                      | <b>Spectrum Offset (Hz)</b> | 10061.7803           | <b>Spectrum Type</b>         | STANDARD             |
| <b>Temperature (degree C)</b> | 23.313                       |                             |                      | <b>SW(cyclical) (Hz)</b>     | 24038.46             |
|                               |                              |                             |                      | <b>Sweep Width (Hz)</b>      | 24037.73             |

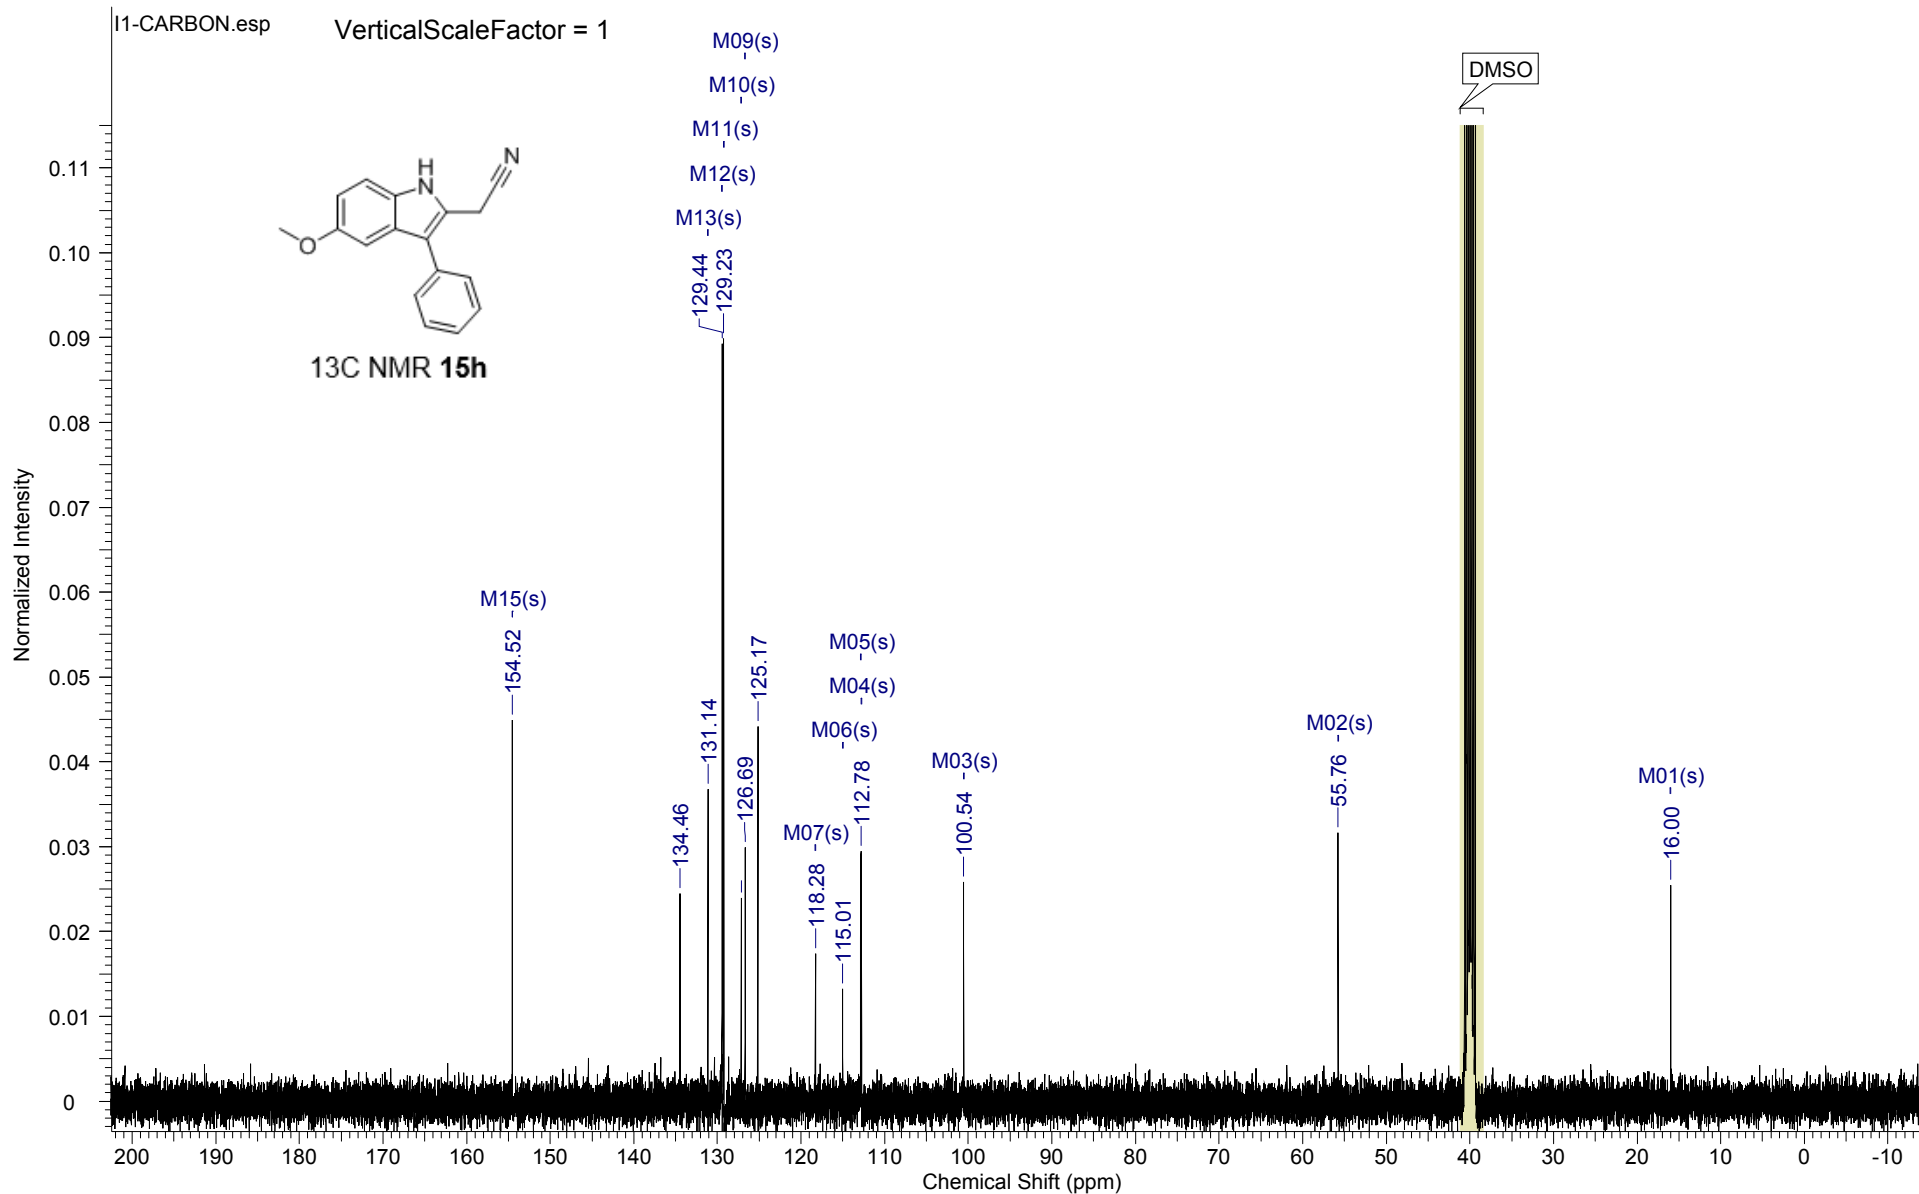

|                               |                 |                               |                      |                   |                      |                             |           |
|-------------------------------|-----------------|-------------------------------|----------------------|-------------------|----------------------|-----------------------------|-----------|
| <b>Acquisition Time (sec)</b> | 4.0894          | <b>Date</b>                   | 08 Aug 2017 09:23:28 | <b>Date Stamp</b> | 08 Aug 2017 09:23:28 |                             |           |
| <b>File Name</b>              | D:\CJO-B1\1\fid | <b>Frequency (MHz)</b>        | 400.15               | <b>Nucleus</b>    | 1H                   | <b>Number of Transients</b> | 64        |
| <b>Origin</b>                 | spect           | <b>Original Points Count</b>  | 32768                | <b>Owner</b>      | IND-NMR              | <b>Points Count</b>         | 32768     |
| <b>Receiver Gain</b>          | 97.12           | <b>SW(cyclical) (Hz)</b>      | 8012.82              | <b>Solvent</b>    | DMSO-d6              | <b>Spectrum Offset (Hz)</b> | 2470.9260 |
| <b>Sweep Width (Hz)</b>       | 8012.58         | <b>Temperature (degree C)</b> | 22.592               |                   |                      | <b>Spectrum Type</b>        | STANDARD  |

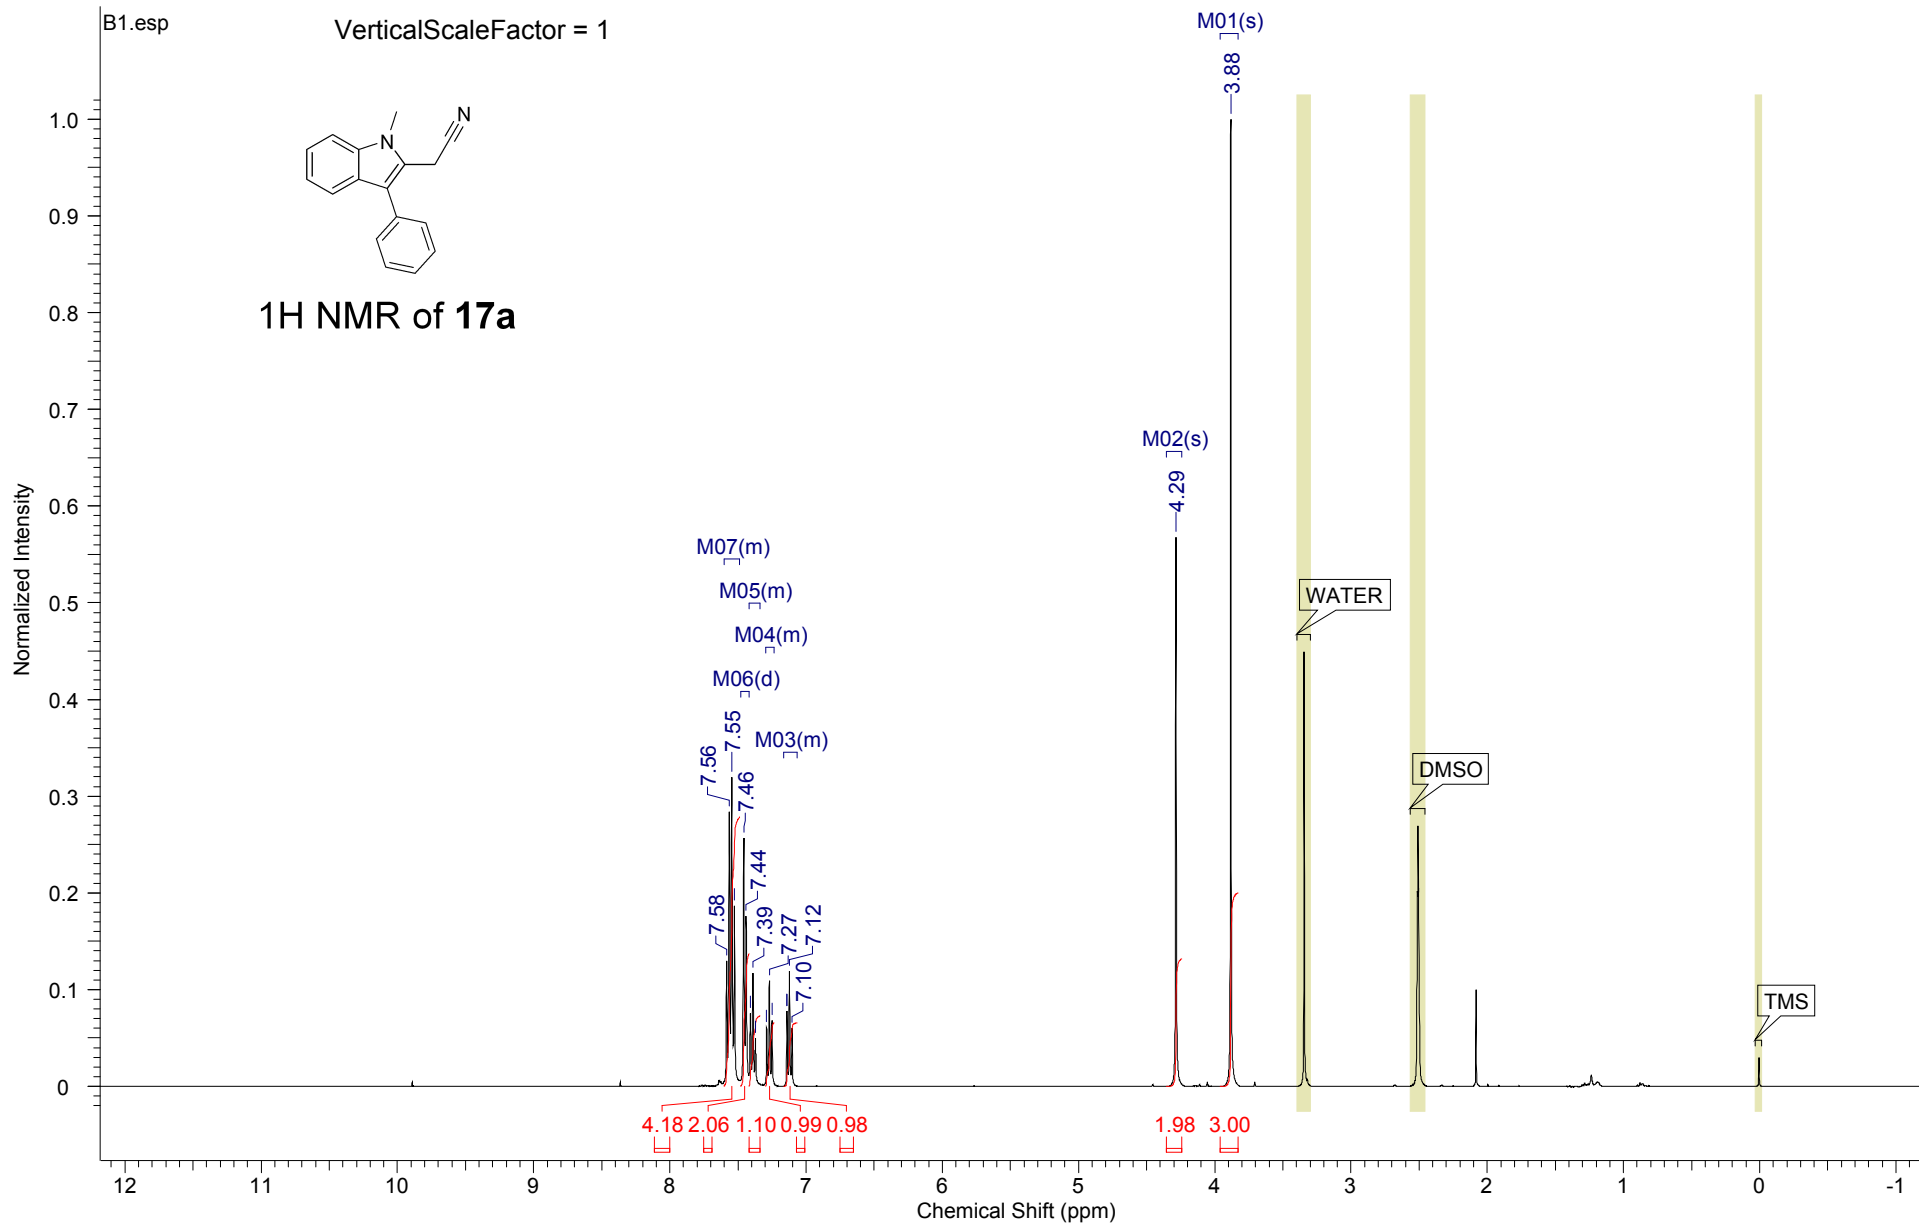

|                        |                          |                        |                      |               |            |                      |            |
|------------------------|--------------------------|------------------------|----------------------|---------------|------------|----------------------|------------|
| Acquisition Time (sec) | 1.3631                   | Date                   | 09 Aug 2017 03:48:32 |               | Date Stamp | 09 Aug 2017 03:48:32 |            |
| File Name              | D:\CJO-UCSF\CJO-B1\2\fid | Frequency (MHz)        | 100.63               | Nucleus       | 13C        | Number of Transients | 3000       |
| Origin                 | spect                    | Original Points Count  | 32768                | Owner         | IND-NMR    | Points Count         | 32768      |
| Receiver Gain          | 196.40                   | SW(cyclical) (Hz)      | 24038.46             | Solvent       | DMSO-d6    | Spectrum Offset (Hz) | 10061.7803 |
| Sweep Width (Hz)       | 24037.73                 | Temperature (degree C) | 23.384               | Spectrum Type | STANDARD   |                      |            |

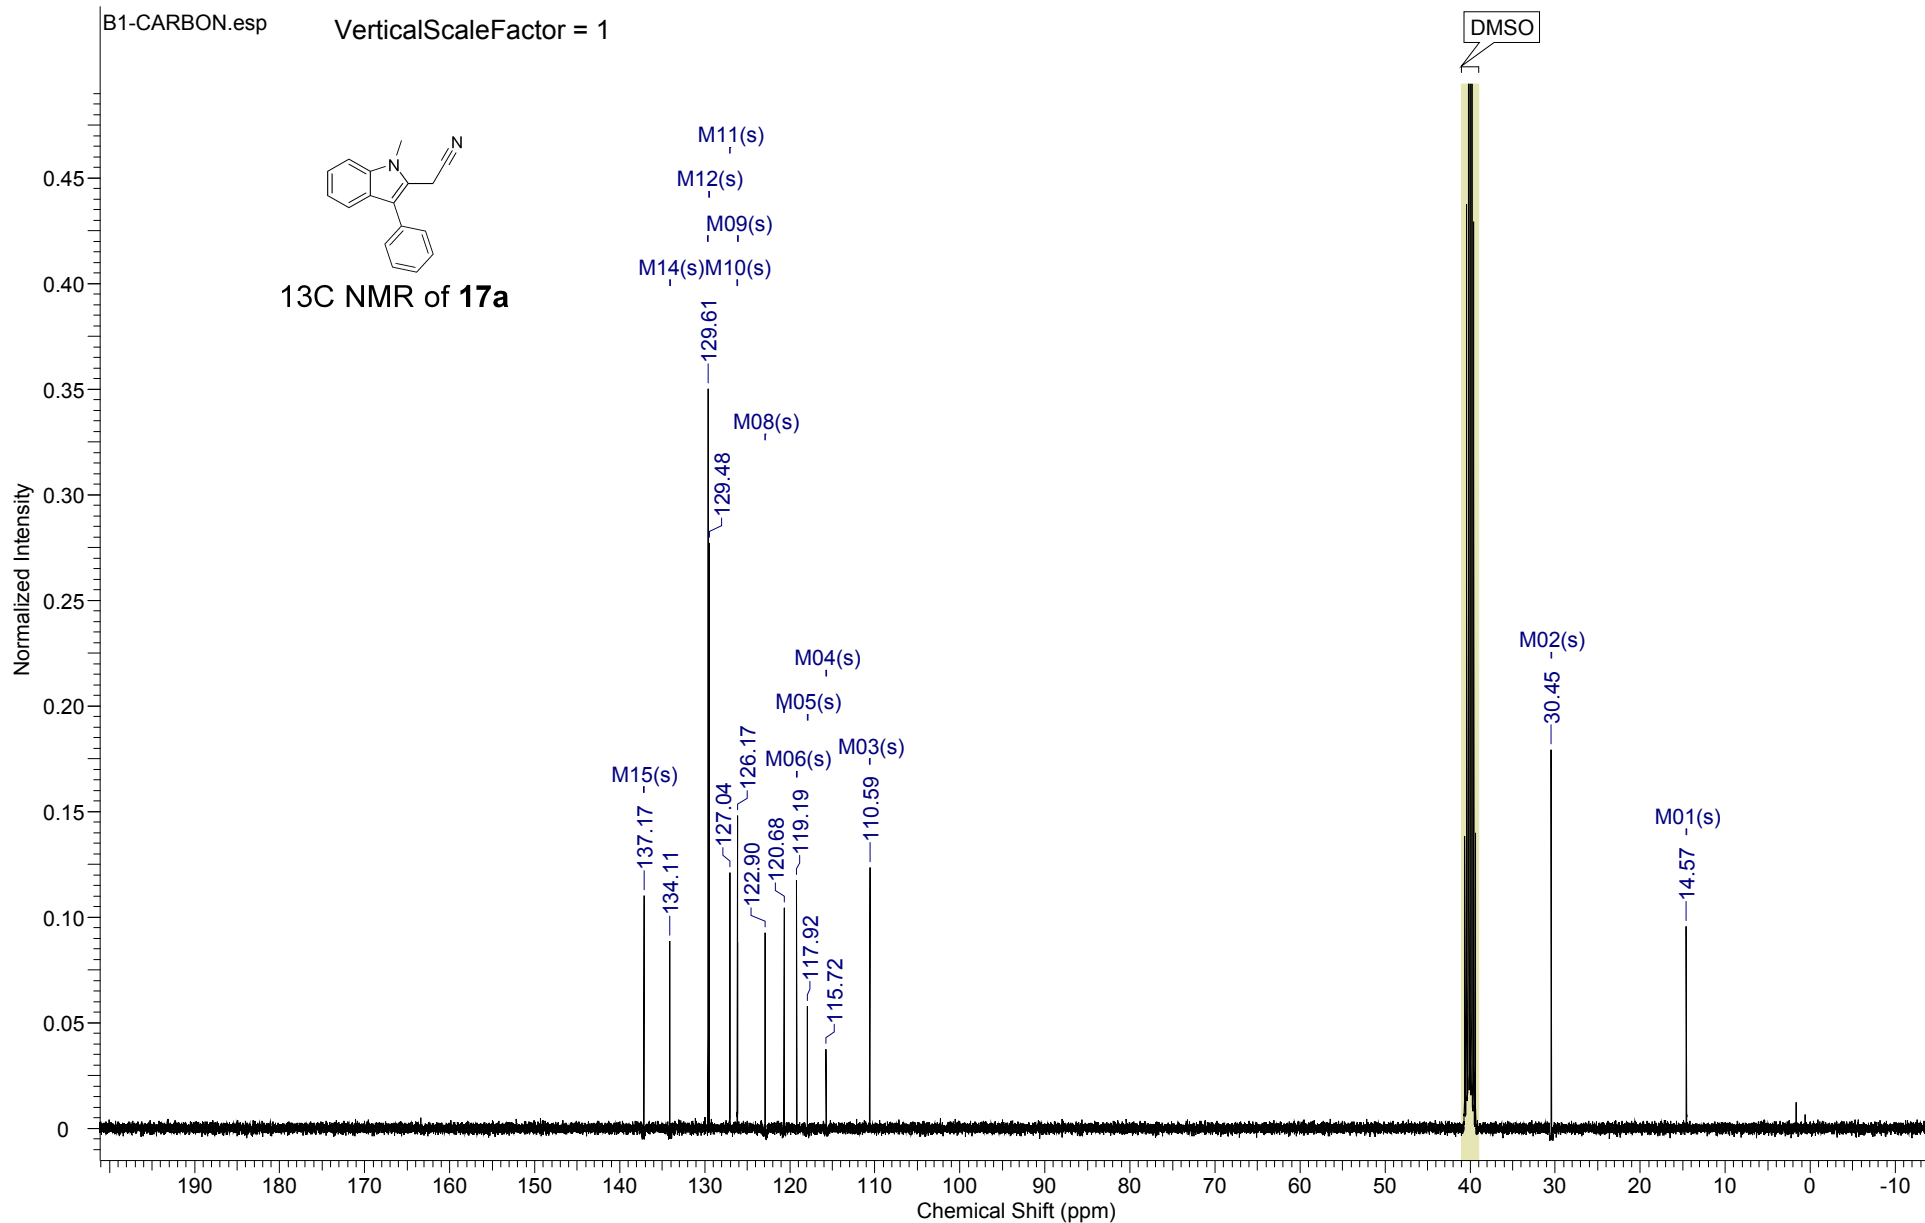

|                               |                              |                               |                      |                             |                      |
|-------------------------------|------------------------------|-------------------------------|----------------------|-----------------------------|----------------------|
| <b>Acquisition Time (sec)</b> | 4.0894                       | <b>Date</b>                   | 12 Sep 2017 10:23:12 | <b>Date Stamp</b>           | 12 Sep 2017 10:23:12 |
| <b>File Name</b>              | D:\CJO-UCSF\NMR\CJO-C1\3\fid | <b>Frequency (MHz)</b>        | 400.15               | <b>Nucleus</b>              | <sup>1</sup> H       |
| <b>Origin</b>                 | spect                        | <b>Original Points Count</b>  | 32768                | <b>Owner</b>                | IND-NMR              |
| <b>Receiver Gain</b>          | 70.44                        | <b>SW(cyclical) (Hz)</b>      | 8012.82              | <b>Points Count</b>         | 32768                |
| <b>Sweep Width (Hz)</b>       | 8012.58                      | <b>Temperature (degree C)</b> | 22.468               | <b>Spectrum Offset (Hz)</b> | 2470.9255            |
|                               |                              |                               |                      | <b>Spectrum Type</b>        | STANDARD             |

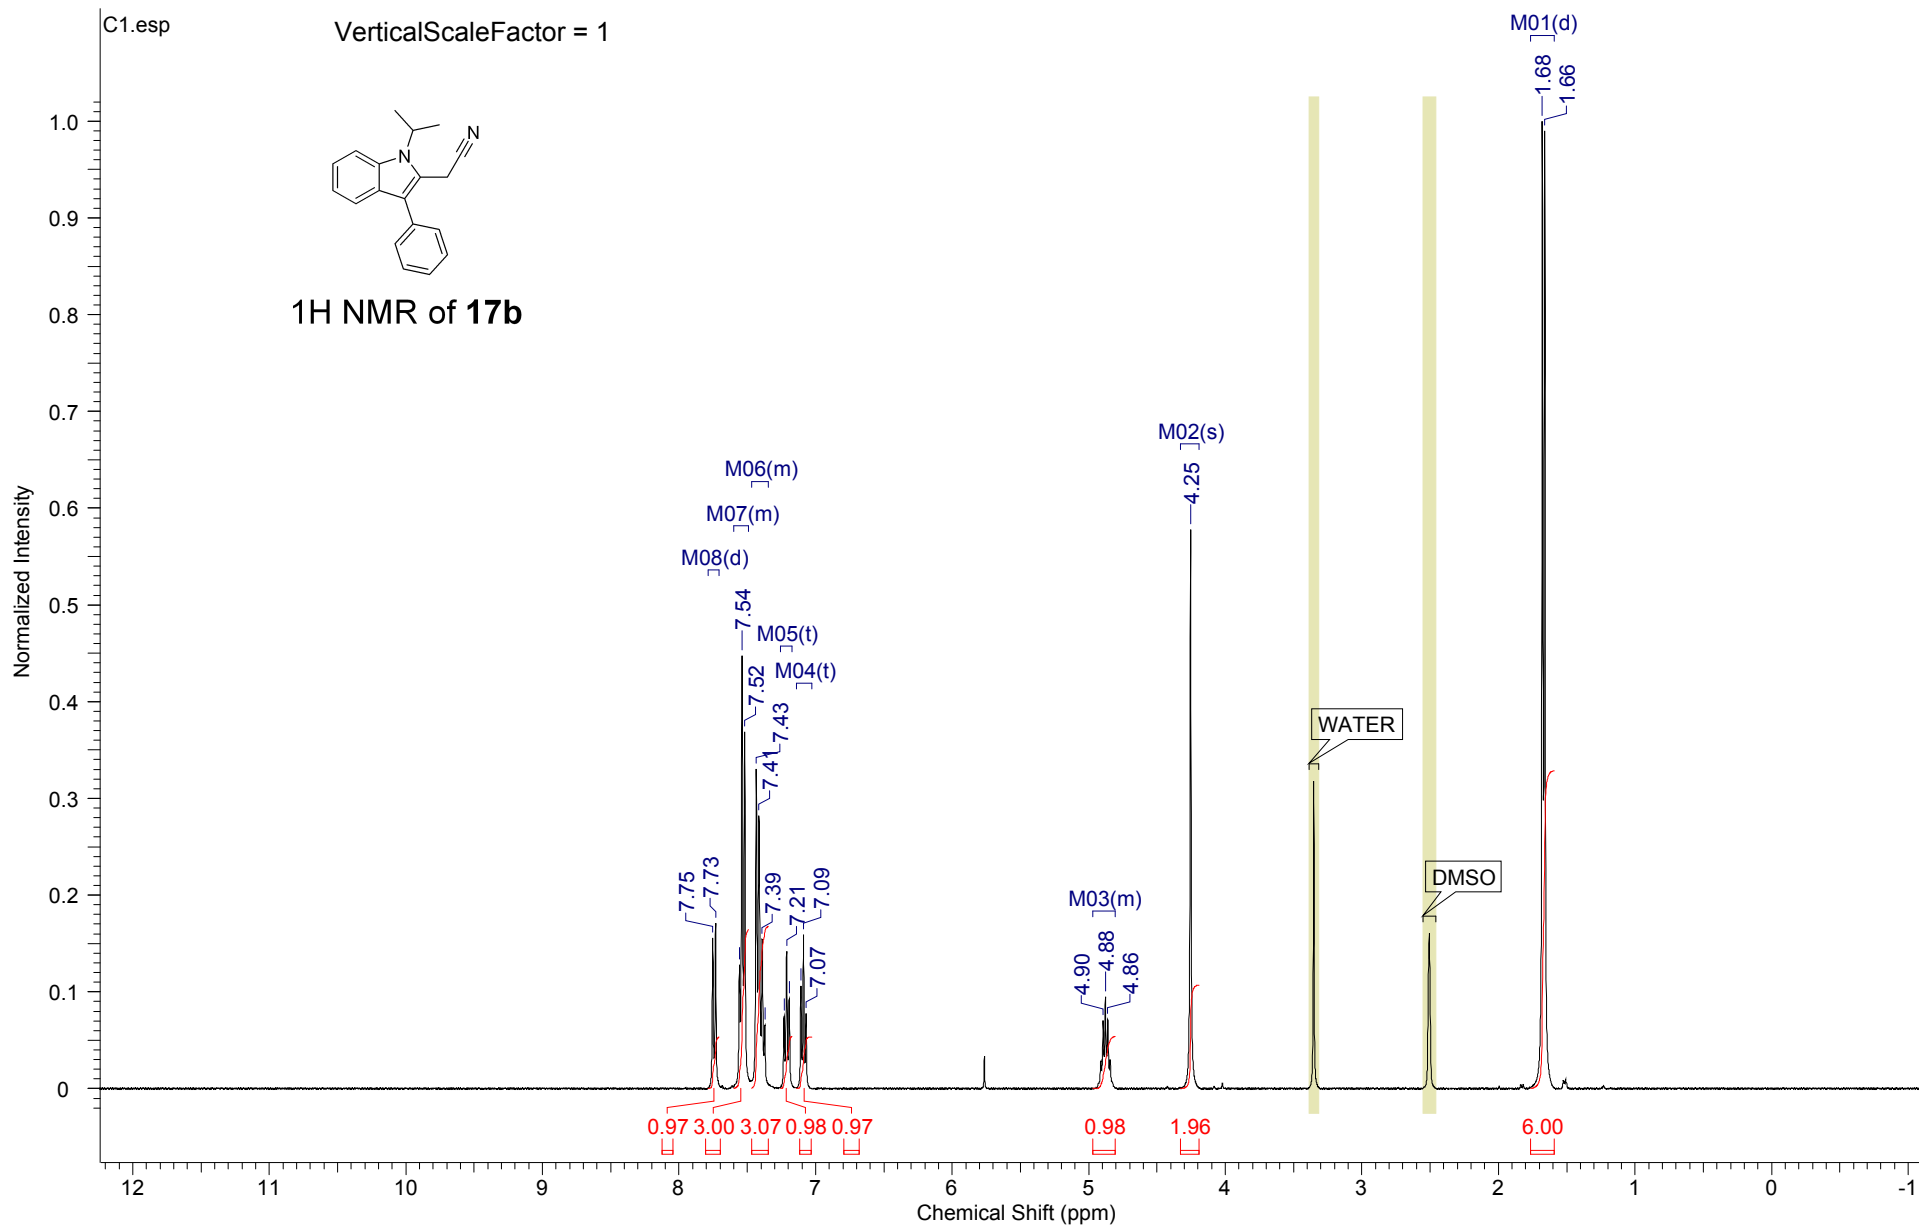

|                        |                                   |                      |                      |                       |                      |
|------------------------|-----------------------------------|----------------------|----------------------|-----------------------|----------------------|
| Acquisition Time (sec) | 1.3631                            | Date                 | 12 Sep 2017 23:58:08 | Date Stamp            | 12 Sep 2017 23:58:08 |
| File Name              | D:\CJO-UCSF\NMR\CJO-C1\CARBON\fid | Frequency (MHz)      | 100.63               | Nucleus               | <sup>13</sup> C      |
| Number of Transients   | 2000                              | Origin               | spect                | Original Points Count | 32768                |
| Points Count           | 32768                             | Pulse Sequence       | zgpg30               | Receiver Gain         | 196.40               |
| Solvent                | DMSO-d6                           | Spectrum Offset (Hz) | 10061.7803           | Spectrum Type         | STANDARD             |
| Temperature (degree C) | 23.224                            | SW(cyclical) (Hz)    |                      | Sweep Width (Hz)      | 24037.73             |

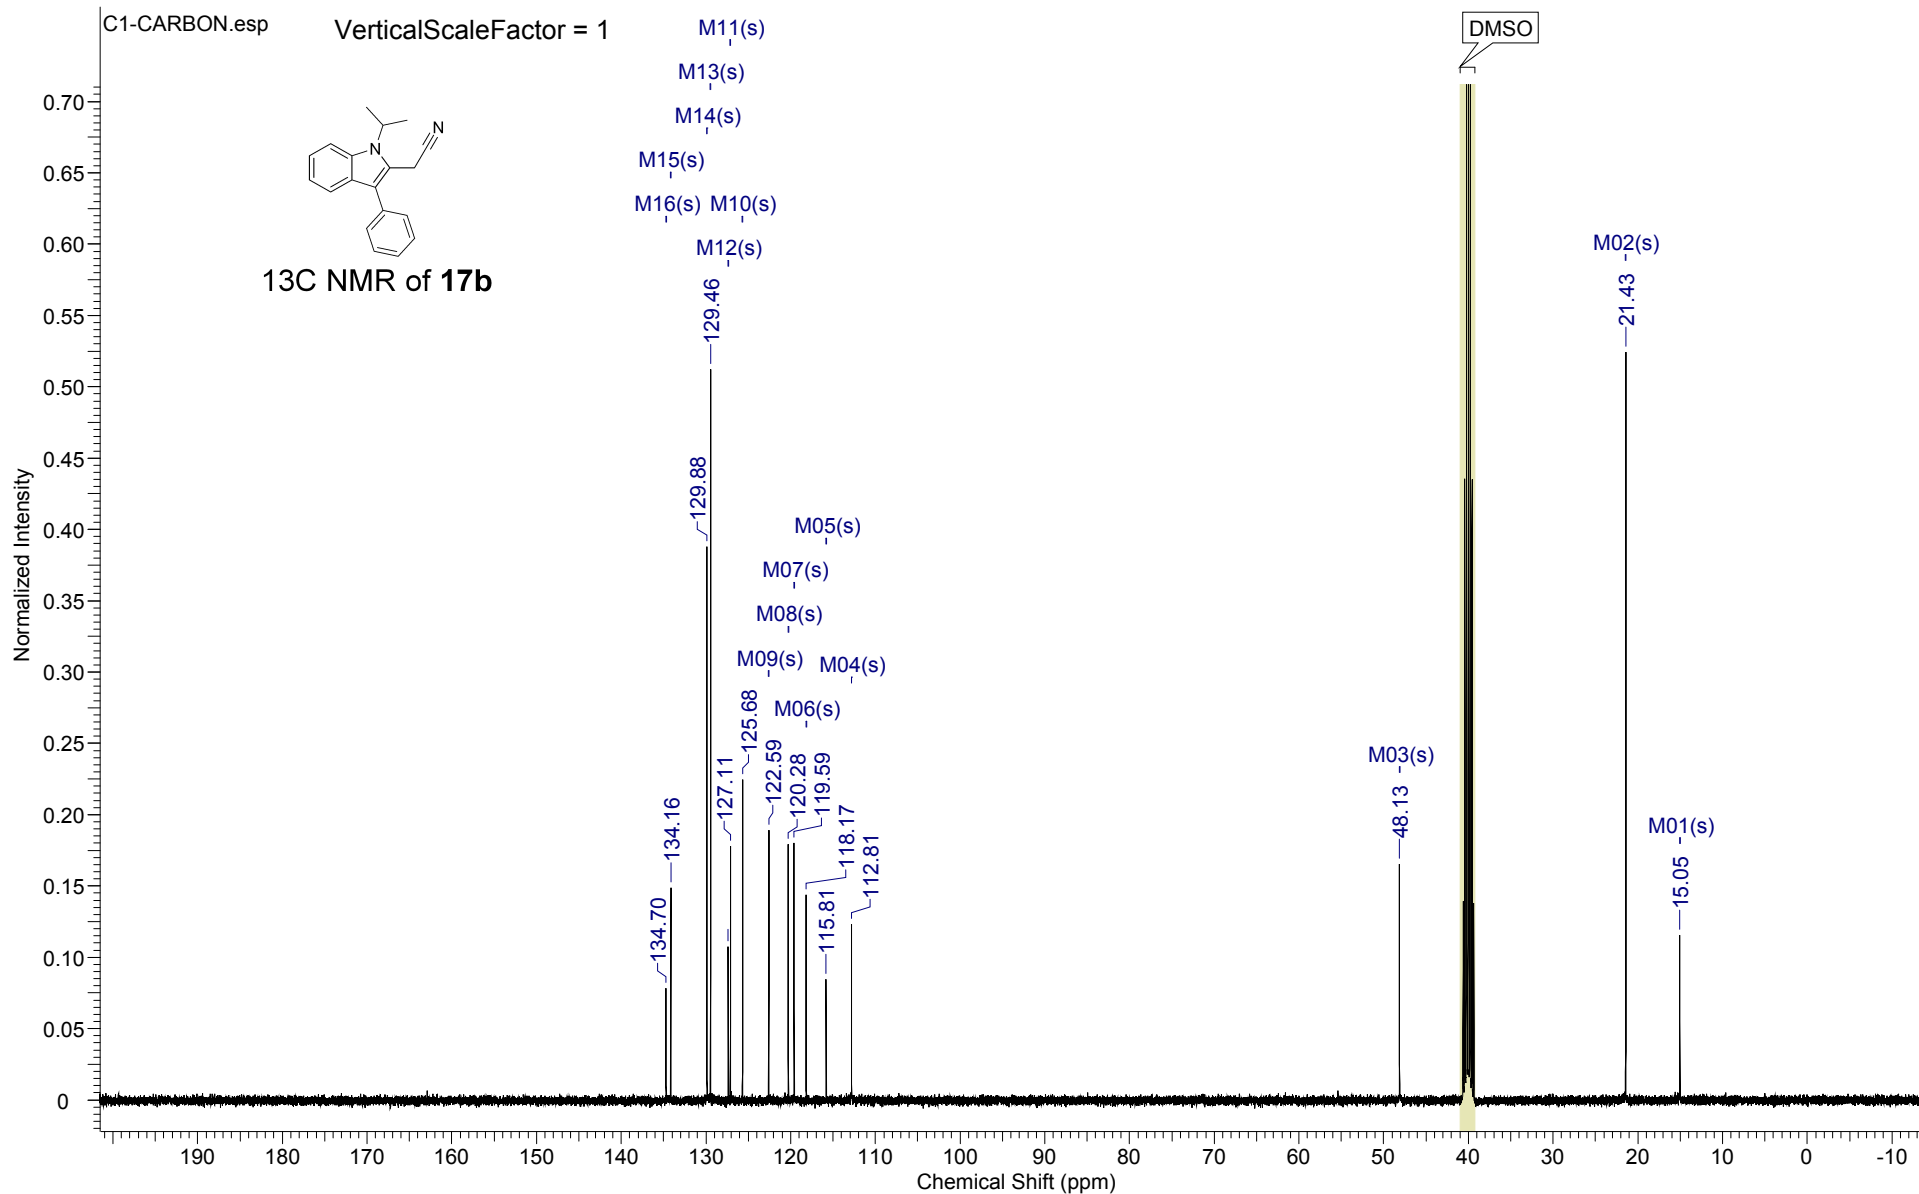

|                        |                         |                        |                      |                      |                      |
|------------------------|-------------------------|------------------------|----------------------|----------------------|----------------------|
| Acquisition Time (sec) | 4.0894                  | Date                   | 05 Aug 2017 13:28:48 | Date Stamp           | 05 Aug 2017 13:28:48 |
| File Name              | D:\NMR\CJO\CJO-U1\1\fid | Frequency (MHz)        | 400.15               | Nucleus              | 1H                   |
| Origin                 | spect                   | Original Points Count  | 32768                | Owner                | IND-NMR              |
| Receiver Gain          | 56.60                   | SW(cyclical) (Hz)      | 8012.82              | Points Count         | 32768                |
| Sweep Width (Hz)       | 8012.58                 | Solvent                | DMSO-d6              | Spectrum Offset (Hz) | 2470.9260            |
|                        |                         | Temperature (degree C) | 22.742               | Pulse Sequence       | zg30                 |
|                        |                         |                        |                      | Spectrum Type        | STANDARD             |

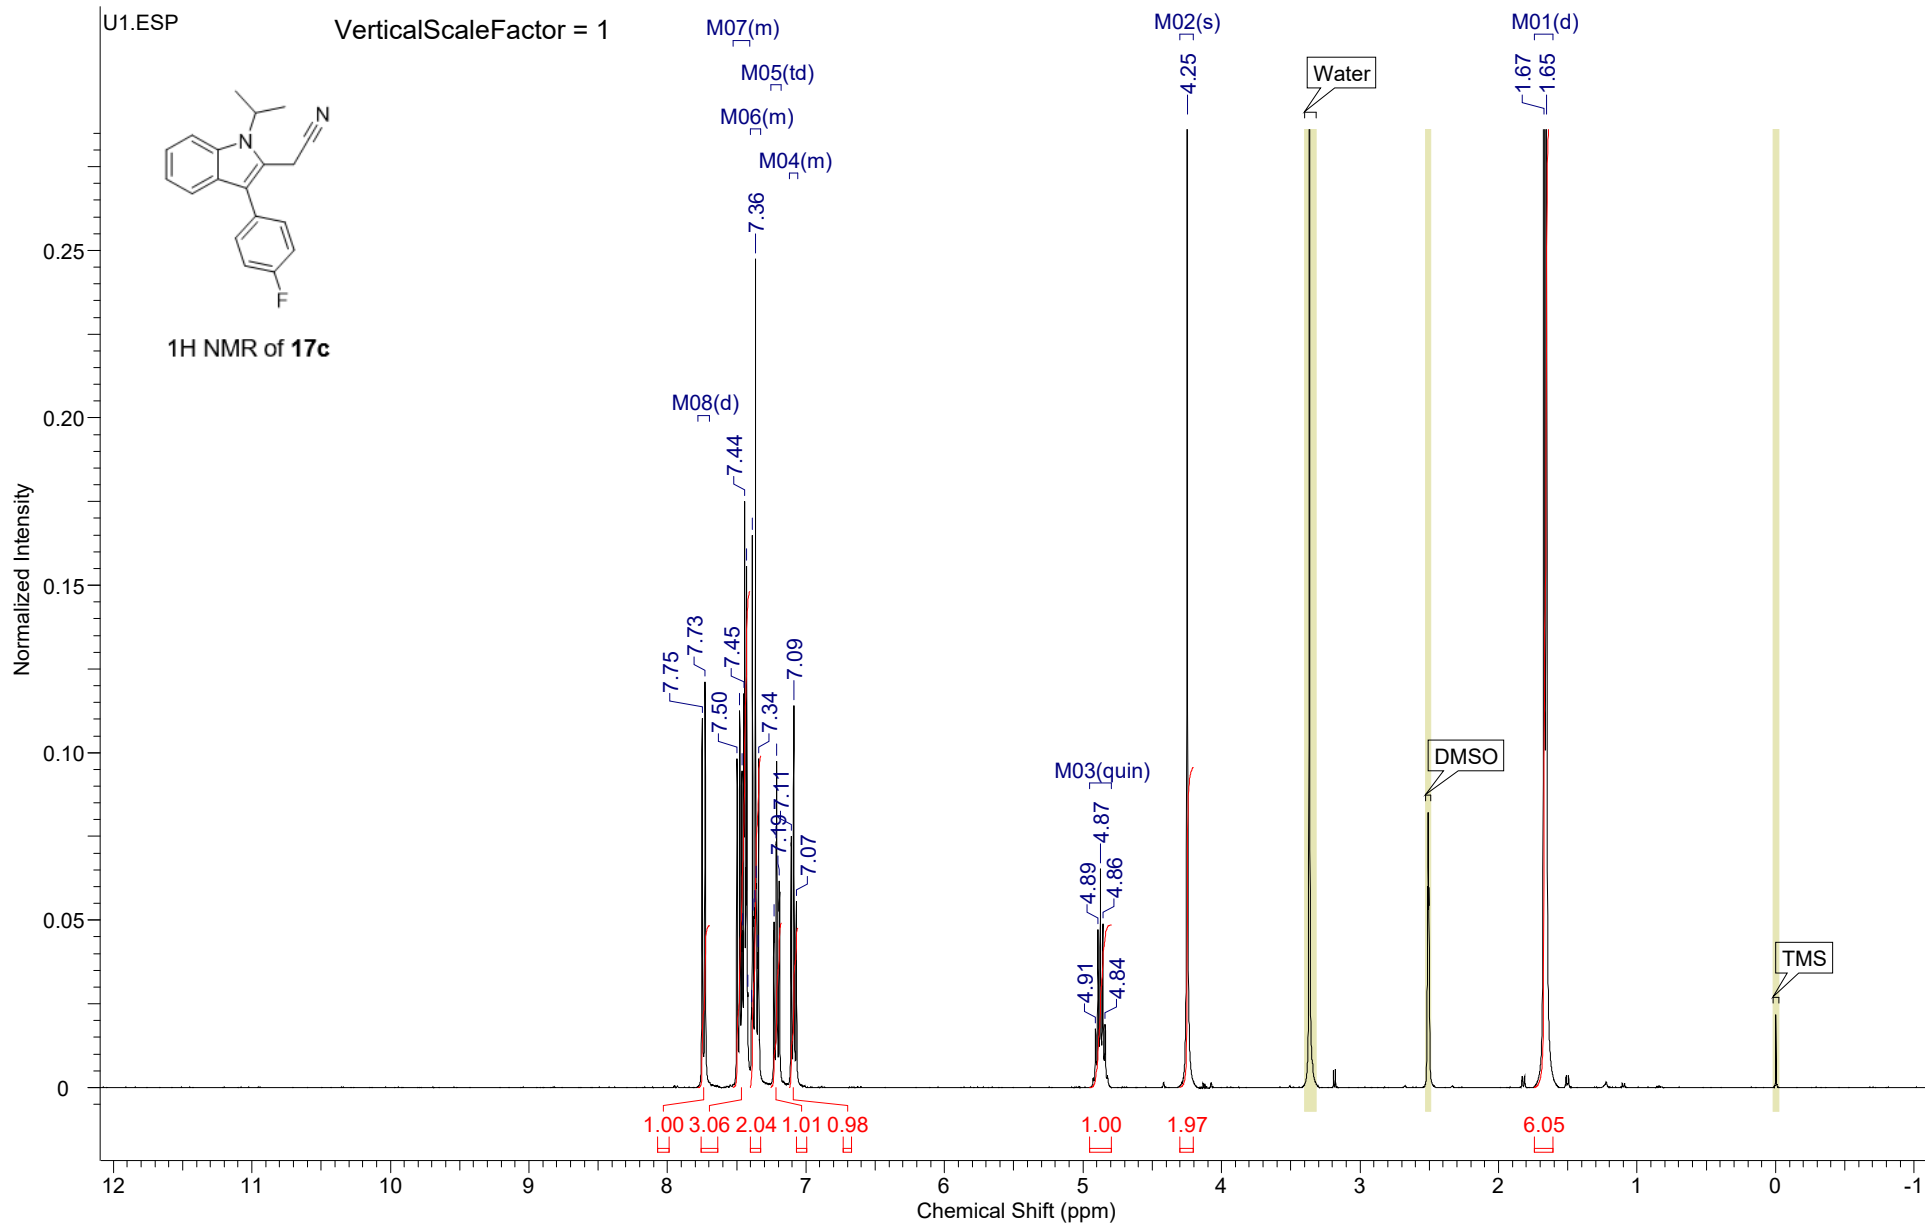

|                        |                         |                        |                      |                      |                      |
|------------------------|-------------------------|------------------------|----------------------|----------------------|----------------------|
| Acquisition Time (sec) | 1.3631                  | Date                   | 05 Aug 2017 22:13:36 | Date Stamp           | 05 Aug 2017 22:13:36 |
| File Name              | D:\NMR\CJO\CJO-U1\2\fid | Frequency (MHz)        | 100.63               | Nucleus              | 13C                  |
| Origin                 | spect                   | Original Points Count  | 32768                | Owner                | IND-NMR              |
| Receiver Gain          | 196.40                  | SW(cyclical) (Hz)      | 24038.46             | Points Count         | 32768                |
| Sweep Width (Hz)       | 24037.73                | Temperature (degree C) | 23.286               | Solvent              | DMSO-d6              |
|                        |                         |                        |                      | Spectrum Offset (Hz) | 10061.7803           |
|                        |                         |                        |                      | Spectrum Type        | STANDARD             |

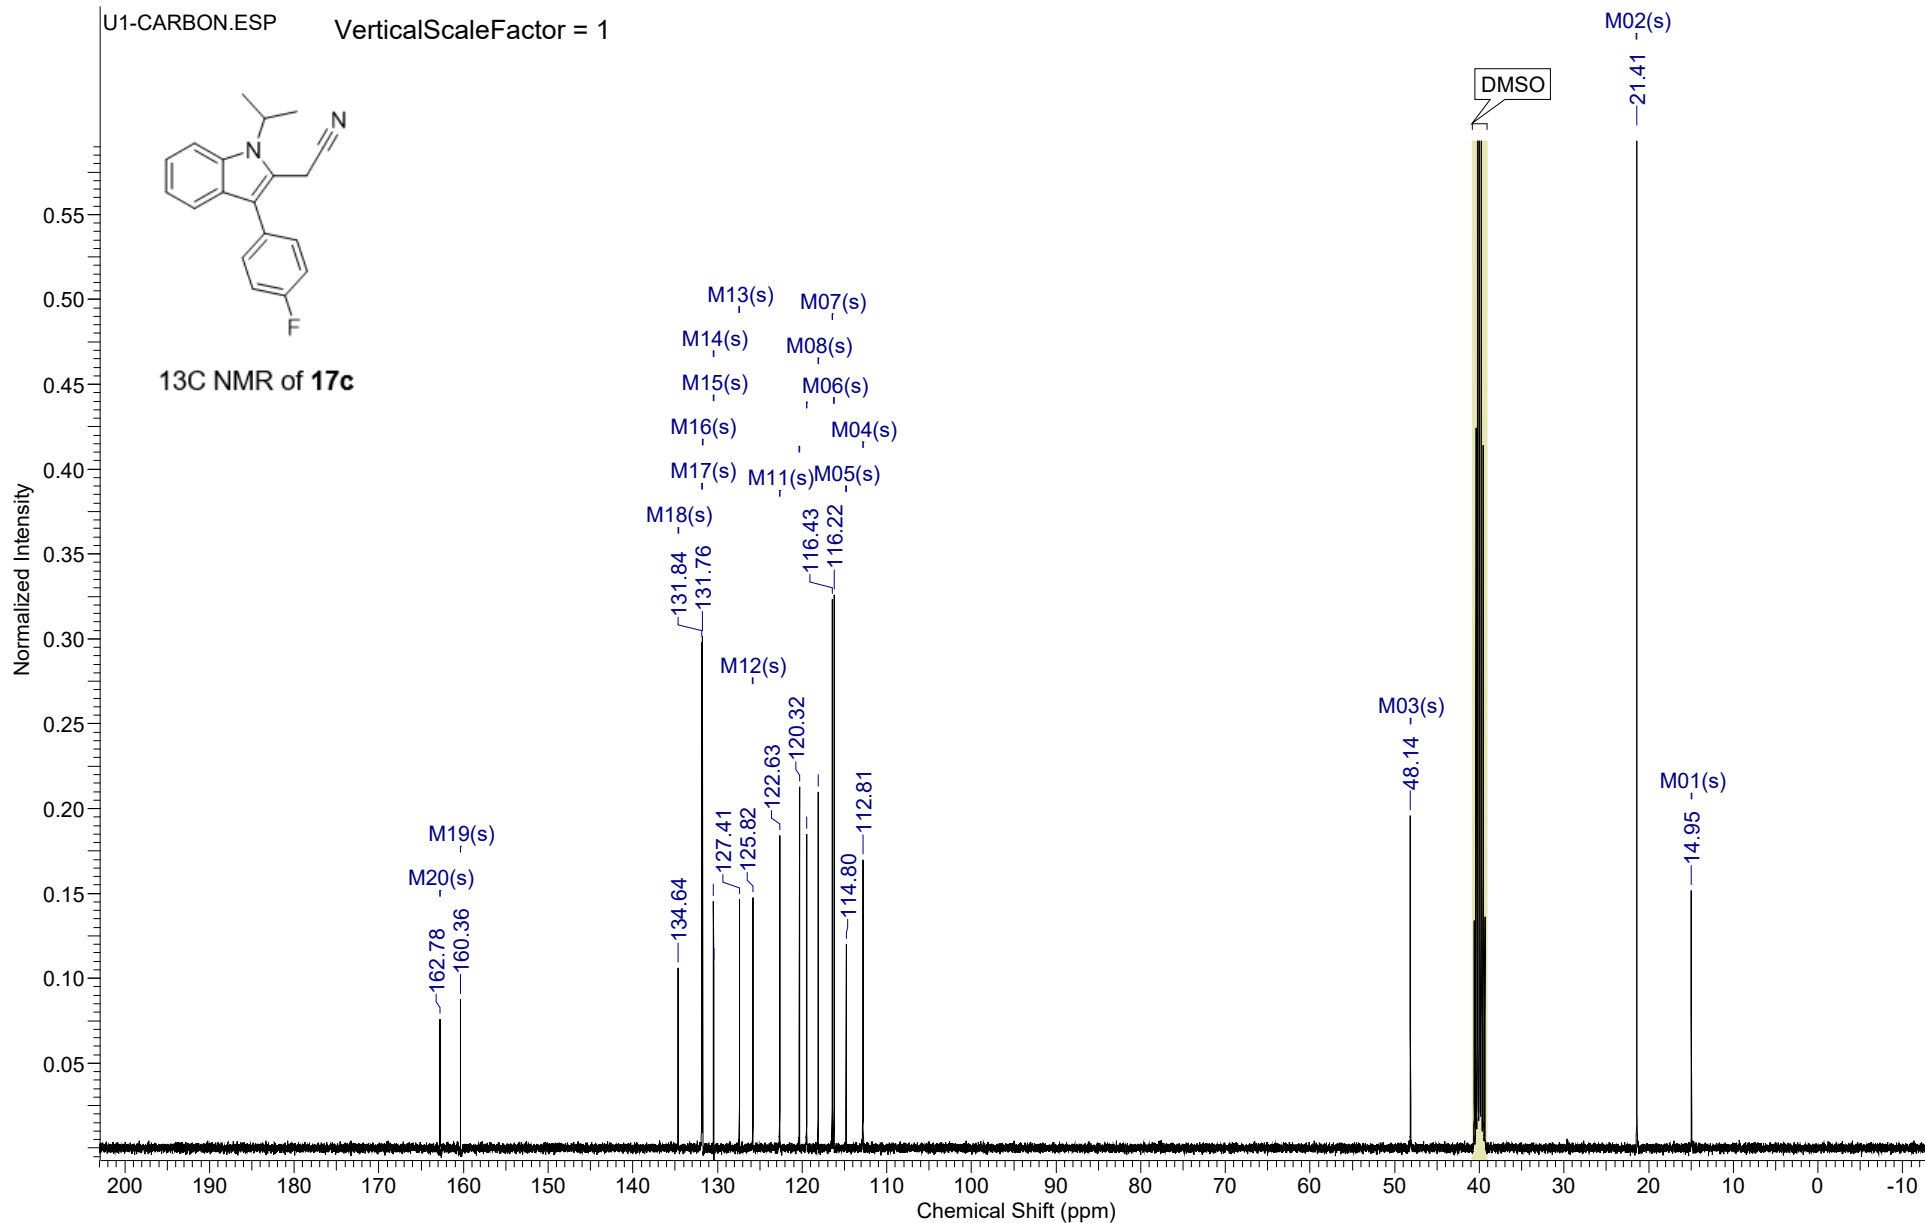



|                               |                              |                               |                      |                |                   |                             |           |
|-------------------------------|------------------------------|-------------------------------|----------------------|----------------|-------------------|-----------------------------|-----------|
| <b>Acquisition Time (sec)</b> | 4.0894                       | <b>Date</b>                   | 31 Aug 2017 11:25:04 |                | <b>Date Stamp</b> | 31 Aug 2017 11:25:04        |           |
| <b>File Name</b>              | D:\CJO-UCSF\NMR\CJO-D1\1\fid | <b>Frequency (MHz)</b>        | 400.15               | <b>Nucleus</b> | 1H                | <b>Number of Transients</b> | 64        |
| <b>Origin</b>                 | spect                        | <b>Original Points Count</b>  | 32768                | <b>Owner</b>   | IND-NMR           | <b>Pulse Sequence</b>       | zg30      |
| <b>Receiver Gain</b>          | 125.72                       | <b>SW(cyclical) (Hz)</b>      | 8012.82              | <b>Solvent</b> | DMSO-d6           | <b>Spectrum Offset (Hz)</b> | 2470.9260 |
| <b>Sweep Width (Hz)</b>       | 8012.58                      | <b>Temperature (degree C)</b> | 22.748               |                |                   | <b>Spectrum Type</b>        | STANDARD  |

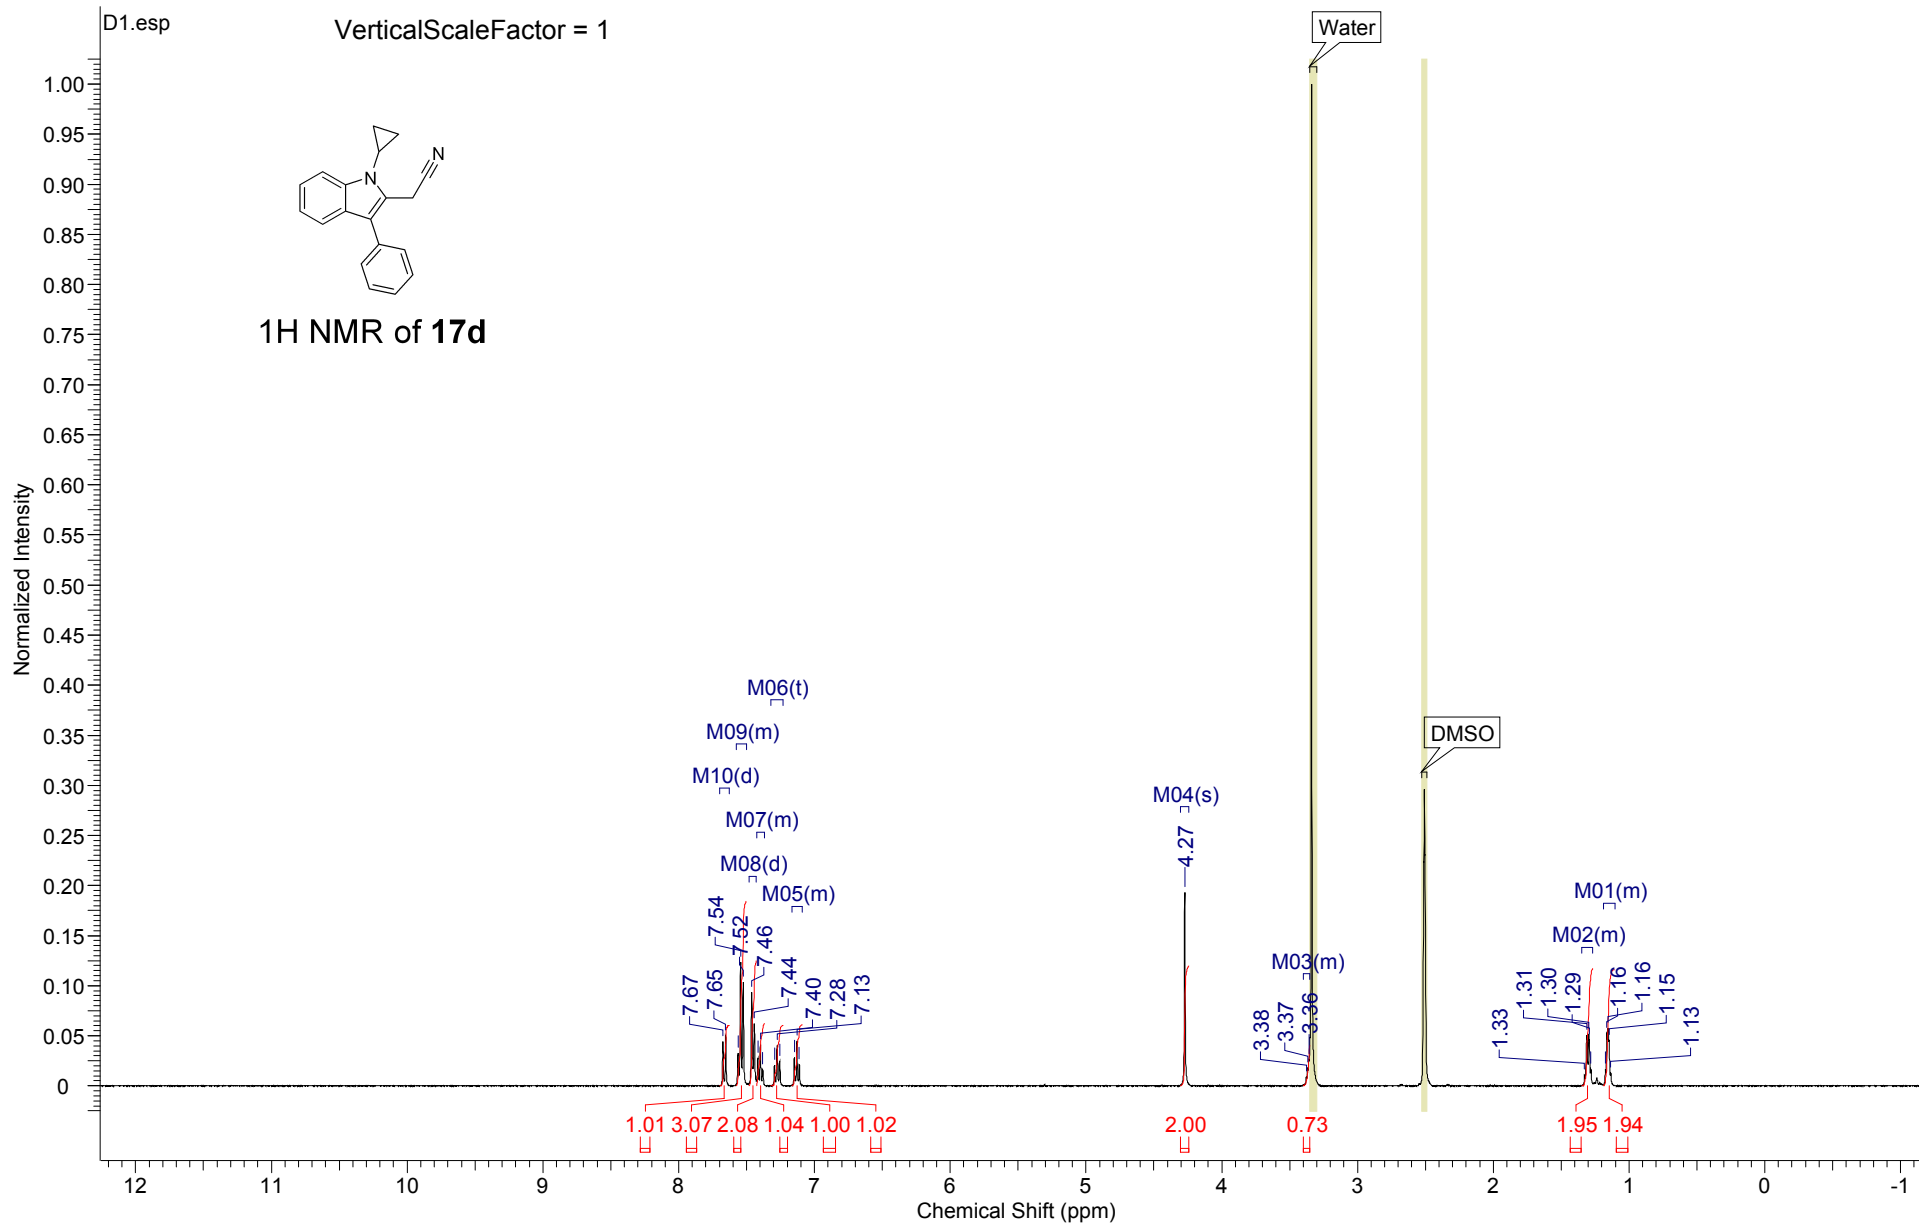

|                               |                                             |                             |                      |                              |                      |
|-------------------------------|---------------------------------------------|-----------------------------|----------------------|------------------------------|----------------------|
| <b>Acquisition Time (sec)</b> | 1.3631                                      | <b>Date</b>                 | 02 Sep 2017 01:53:20 | <b>Date Stamp</b>            | 02 Sep 2017 01:53:20 |
| <b>File Name</b>              | E:\CJO-Indole Project\NMR\CJO-D1\CARBON\fid | <b>Frequency (MHz)</b>      | 100.63               | <b>Nucleus</b>               | <sup>13</sup> C      |
| <b>Number of Transients</b>   | 4000                                        | <b>Origin</b>               | spect                | <b>Original Points Count</b> | 32768                |
| <b>Points Count</b>           | 32768                                       | <b>Pulse Sequence</b>       | zpgg30               | <b>Receiver Gain</b>         | 196.40               |
| <b>Solvent</b>                | DMSO-d6                                     | <b>Spectrum Offset (Hz)</b> | 10061.7803           | <b>Spectrum Type</b>         | STANDARD             |
| <b>Temperature (degree C)</b> | 23.352                                      |                             |                      | <b>Sweep Width (Hz)</b>      | 24037.73             |

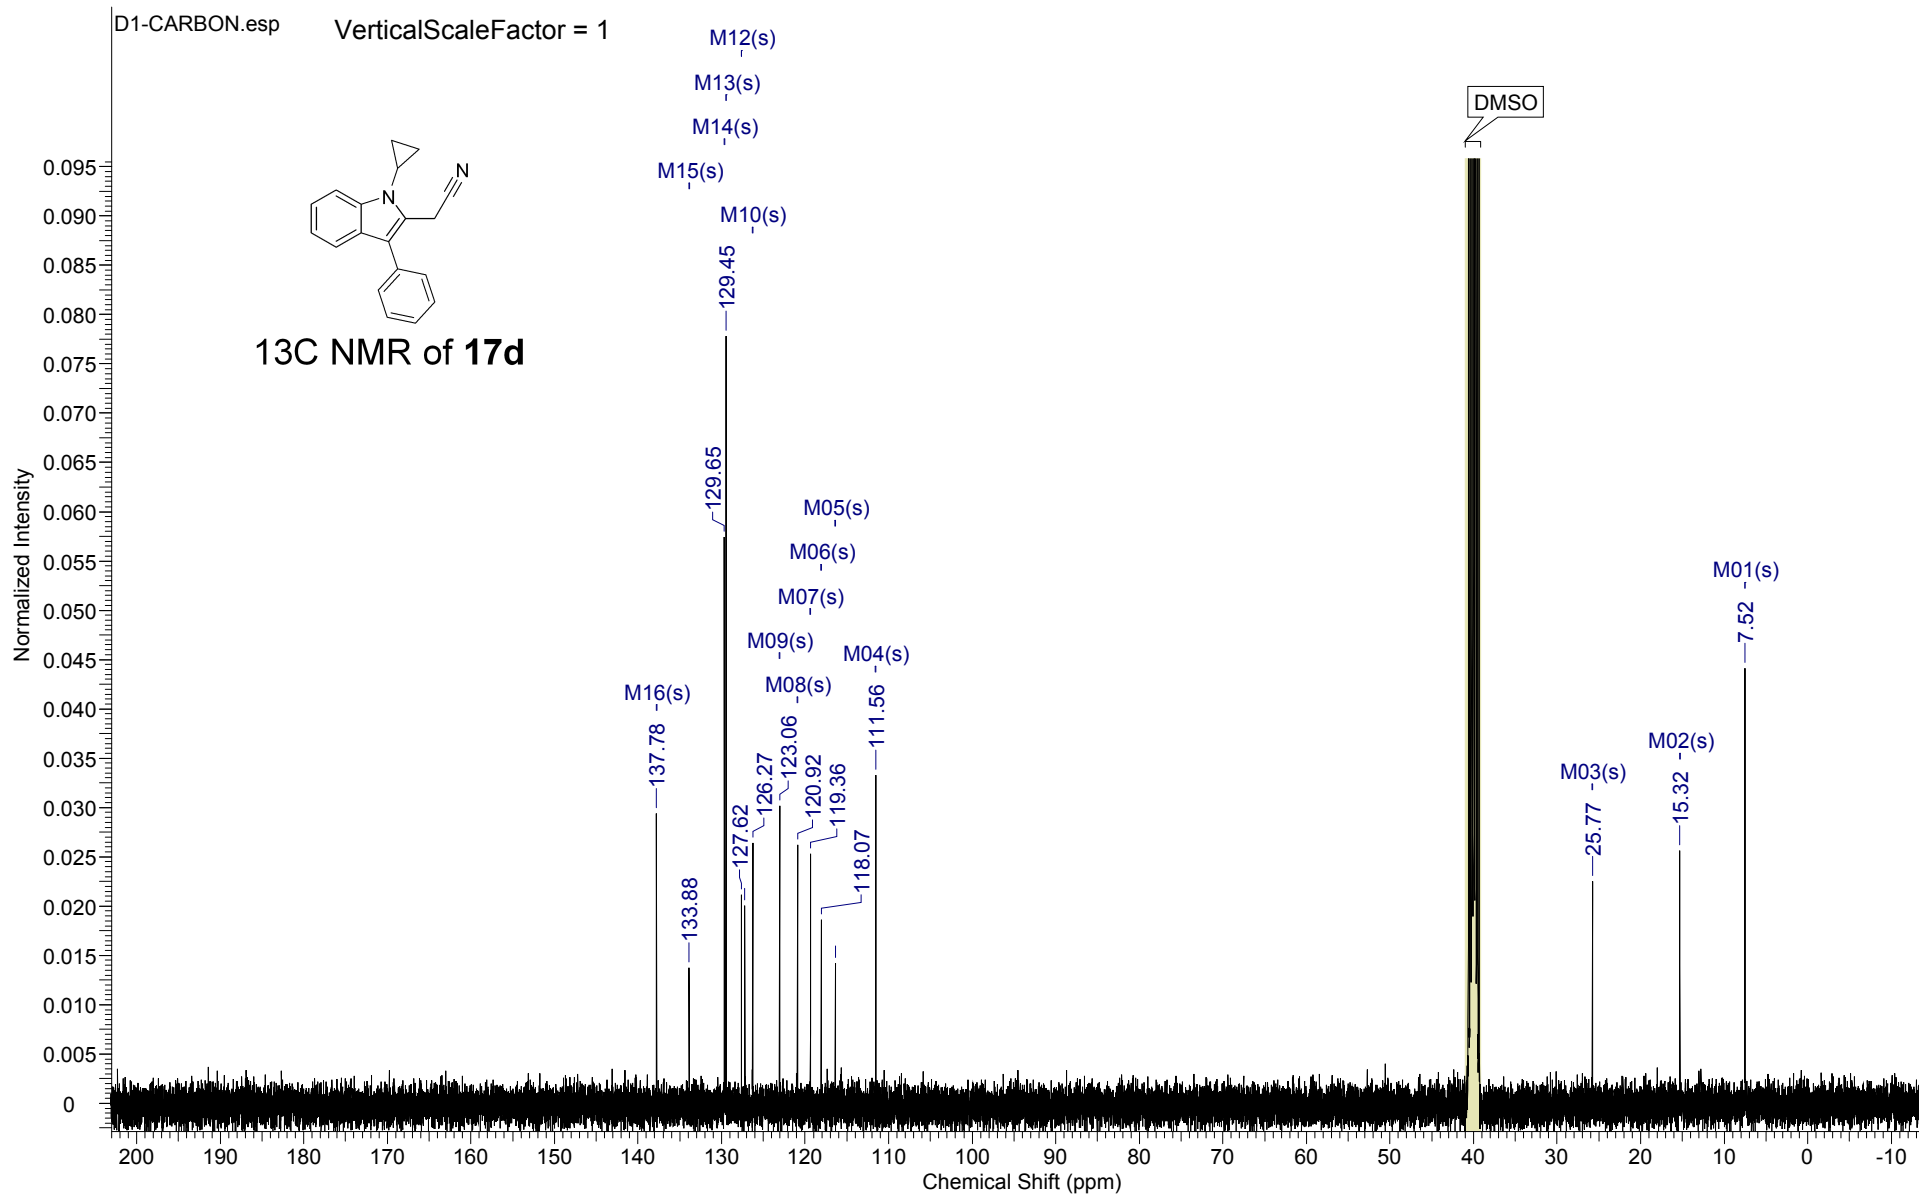

|                        |                              |                        |                      |                      |                      |
|------------------------|------------------------------|------------------------|----------------------|----------------------|----------------------|
| Acquisition Time (sec) | 4.0894                       | Date                   | 19 Sep 2017 08:32:16 | Date Stamp           | 19 Sep 2017 08:32:16 |
| File Name              | D:\CJO-UCSF\NMR\CJO-W1\1\fid | Frequency (MHz)        | 400.15               | Nucleus              | 1H                   |
| Origin                 | spect                        | Original Points Count  | 32768                | Owner                | IND-NMR              |
| Receiver Gain          | 97.12                        | SW(cyclical) (Hz)      | 8012.82              | Points Count         | 32768                |
| Sweep Width (Hz)       | 8012.58                      | Temperature (degree C) | 22.650               | Solvent              | DMSO-d6              |
|                        |                              |                        |                      | Spectrum Offset (Hz) | 2470.9260            |
|                        |                              |                        |                      | Spectrum Type        | STANDARD             |

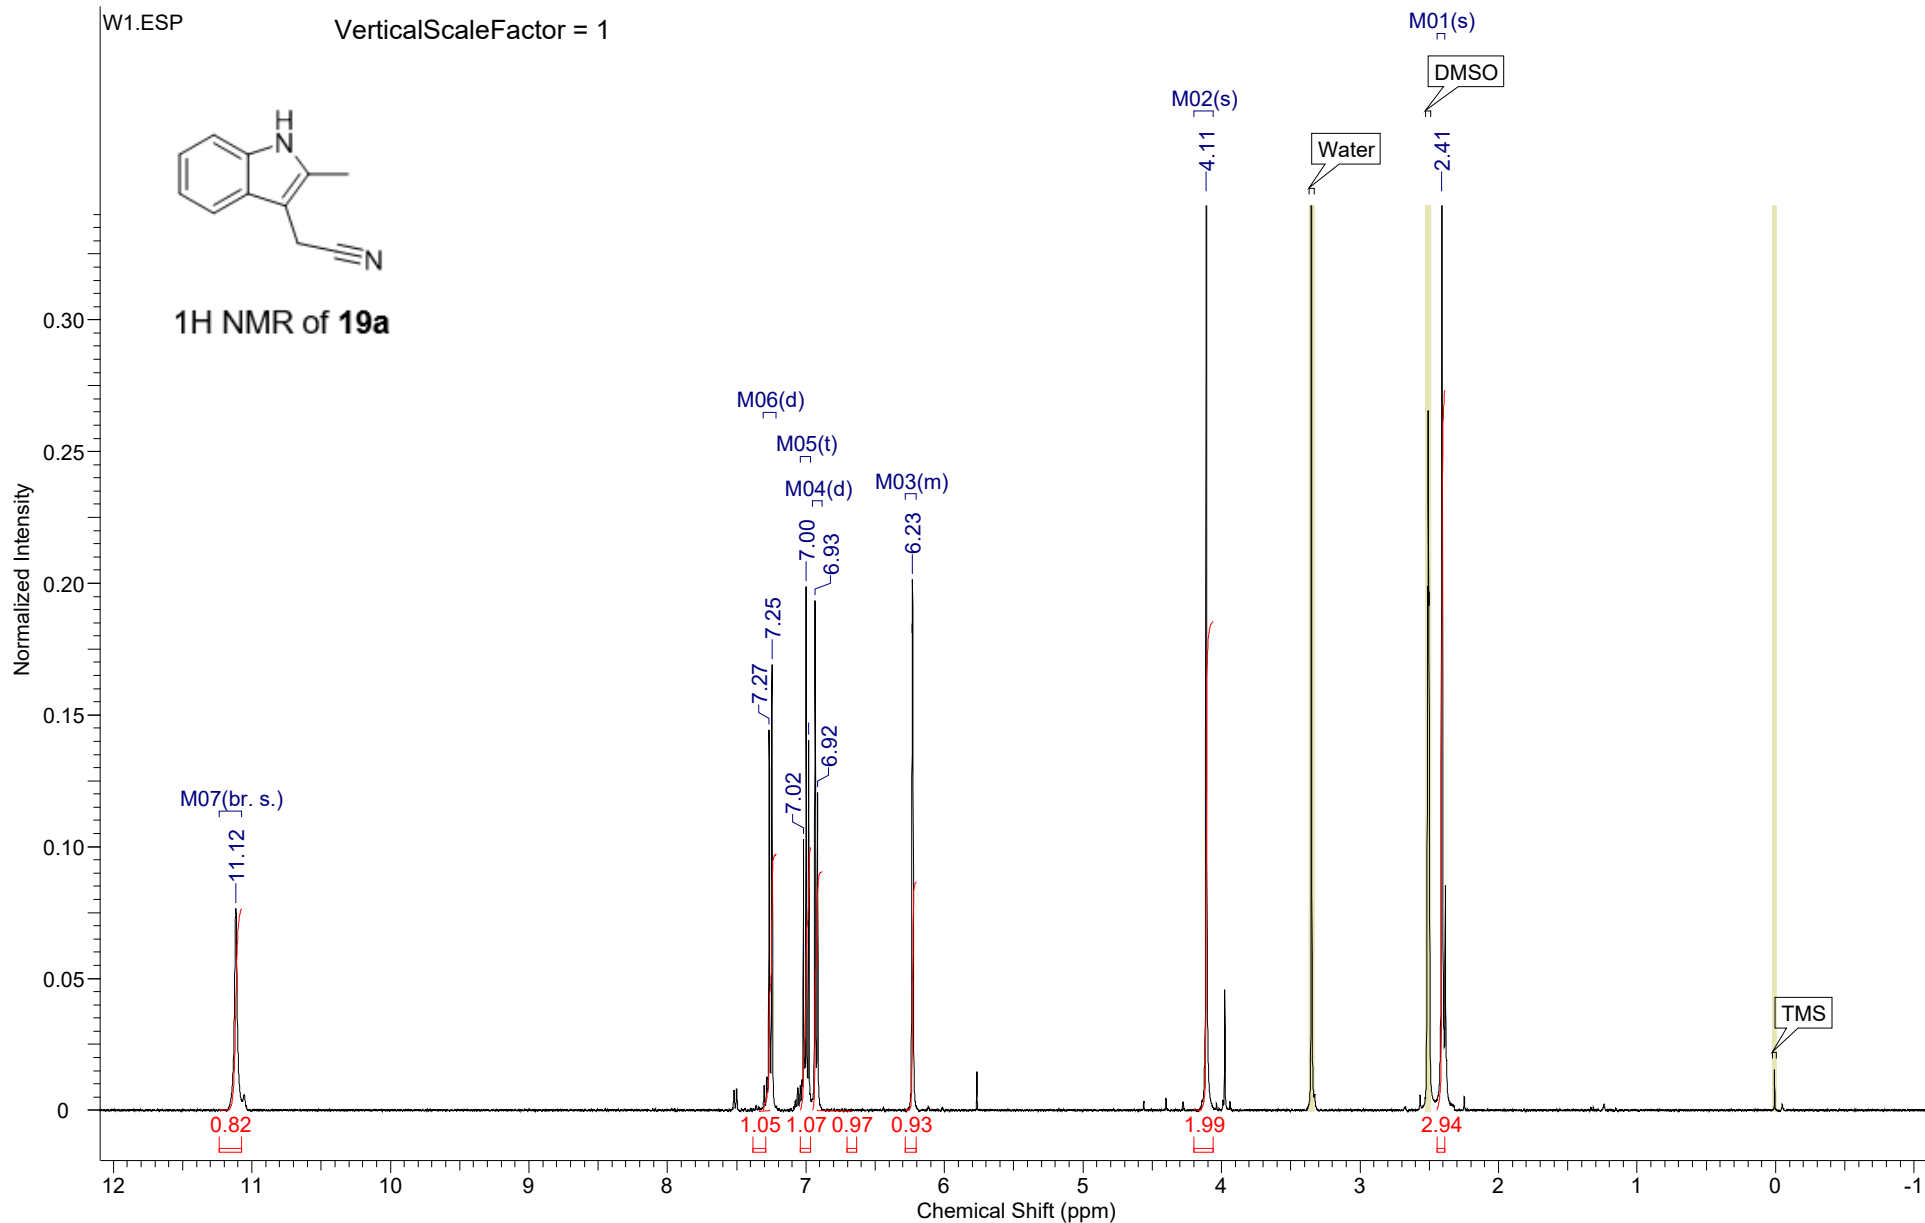

|                        |                                   |                      |                      |                       |                      |
|------------------------|-----------------------------------|----------------------|----------------------|-----------------------|----------------------|
| Acquisition Time (sec) | 1.3631                            | Date                 | 19 Sep 2017 23:58:08 | Date Stamp            | 19 Sep 2017 23:58:08 |
| File Name              | D:\CJO-UCSF\NMR\CJO-W1\CARBON\fid | Frequency (MHz)      | 100.63               | Nucleus               | <sup>13</sup> C      |
| Number of Transients   | 2000                              | Origin               | spect                | Original Points Count | 32768                |
| Points Count           | 32768                             | Pulse Sequence       | zgpg30               | Receiver Gain         | 196.40               |
| Solvent                | DMSO-d6                           | Spectrum Offset (Hz) | 10061.7803           | Spectrum Type         | STANDARD             |
| Temperature (degree C) | 23.164                            | SW(cyclical) (Hz)    |                      | Sweep Width (Hz)      | 24037.73             |

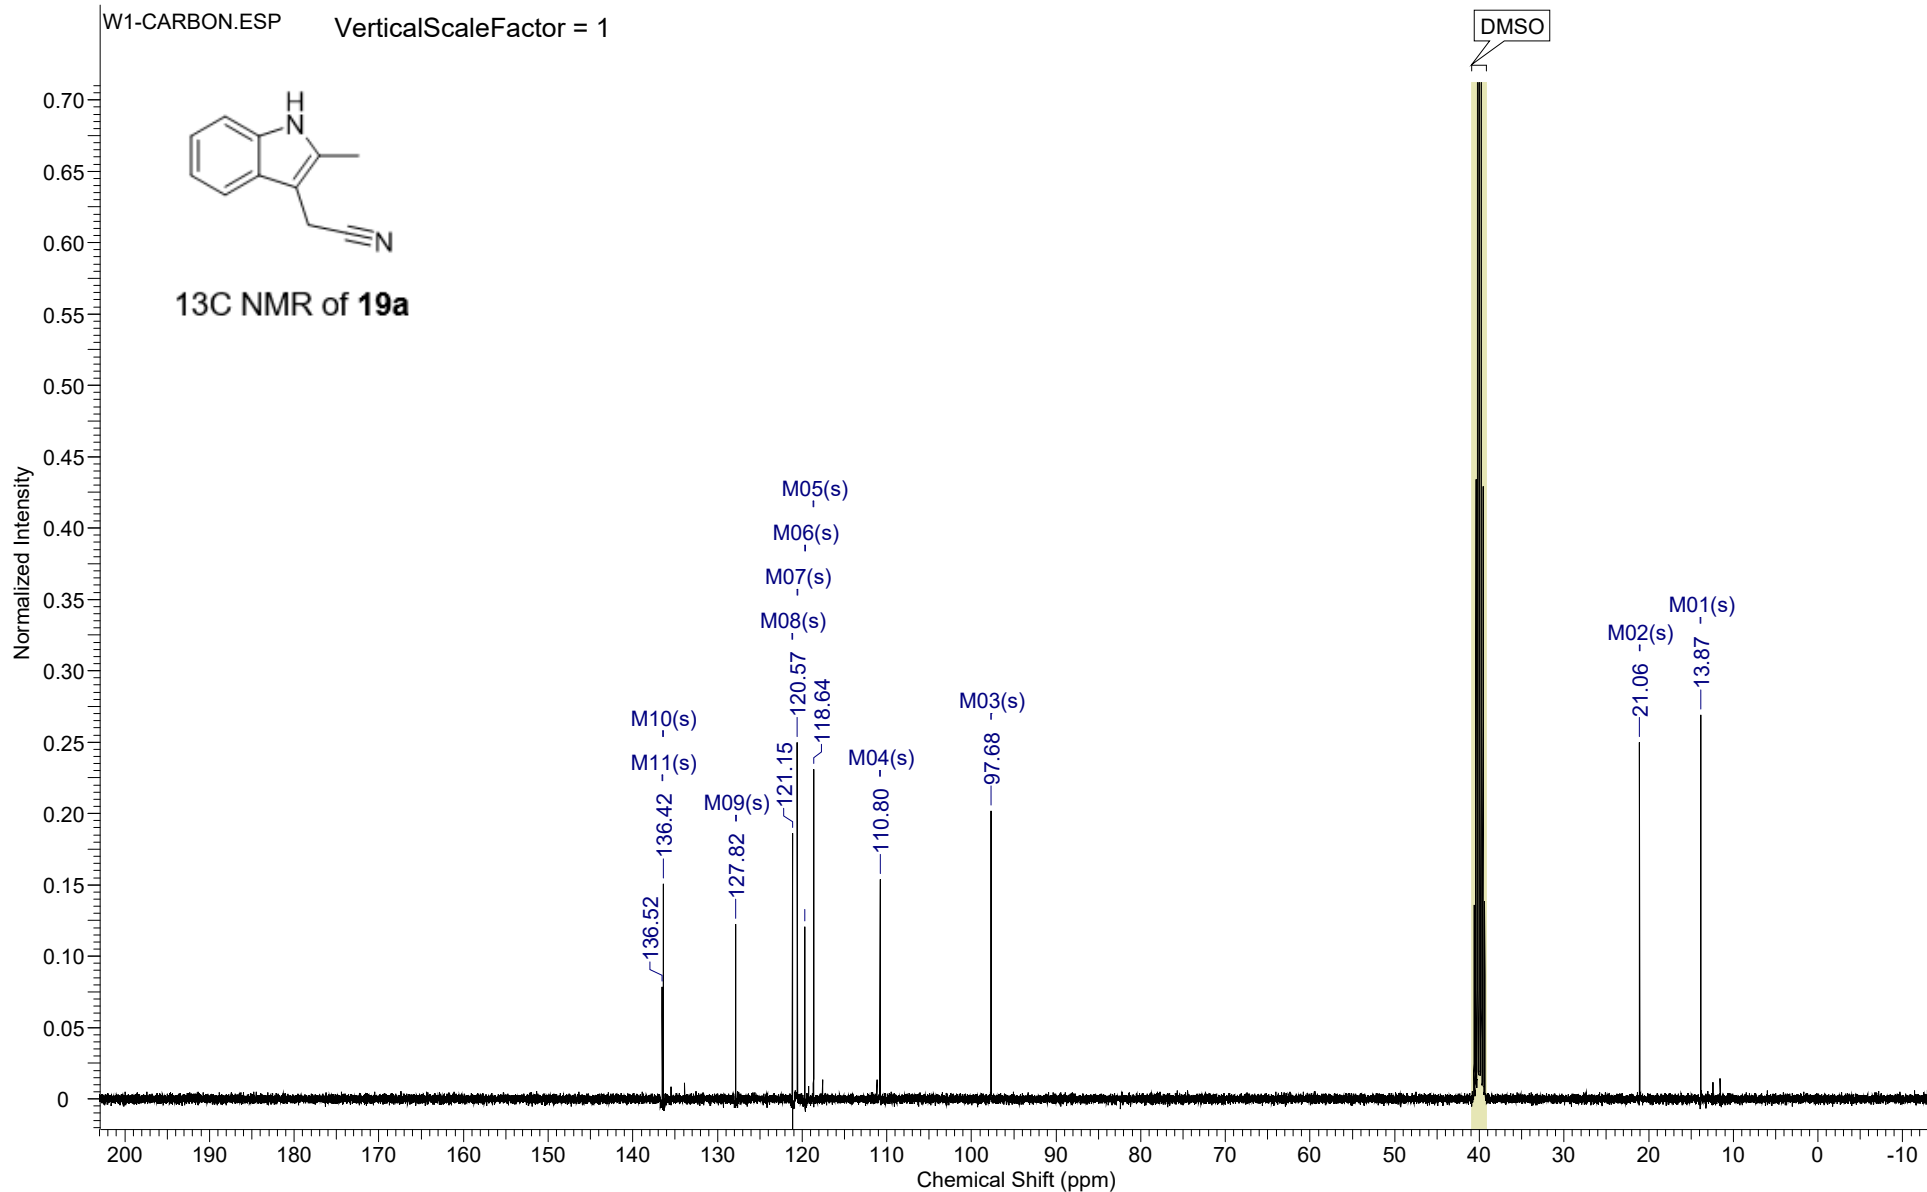

|                        |                              |                        |                      |                      |                      |
|------------------------|------------------------------|------------------------|----------------------|----------------------|----------------------|
| Acquisition Time (sec) | 4.0894                       | Date                   | 23 Sep 2017 10:36:00 | Date Stamp           | 23 Sep 2017 10:36:00 |
| File Name              | D:\CJO-UCSF\NMR\CJO-Z1\1\fid | Frequency (MHz)        | 400.15               | Nucleus              | <sup>1</sup> H       |
| Origin                 | spect                        | Original Points Count  | 32768                | Owner                | IND-NMR              |
| Receiver Gain          | 62.81                        | SW(cyclical) (Hz)      | 8012.82              | Points Count         | 32768                |
| Sweep Width (Hz)       | 8012.58                      | Solvent                | DMSO-d6              | Spectrum Offset (Hz) | 2470.9260            |
|                        |                              | Temperature (degree C) | 22.674               | Number of Transients | 32                   |
|                        |                              |                        |                      | Pulse Sequence       | zg30                 |
|                        |                              |                        |                      | Spectrum Type        | STANDARD             |

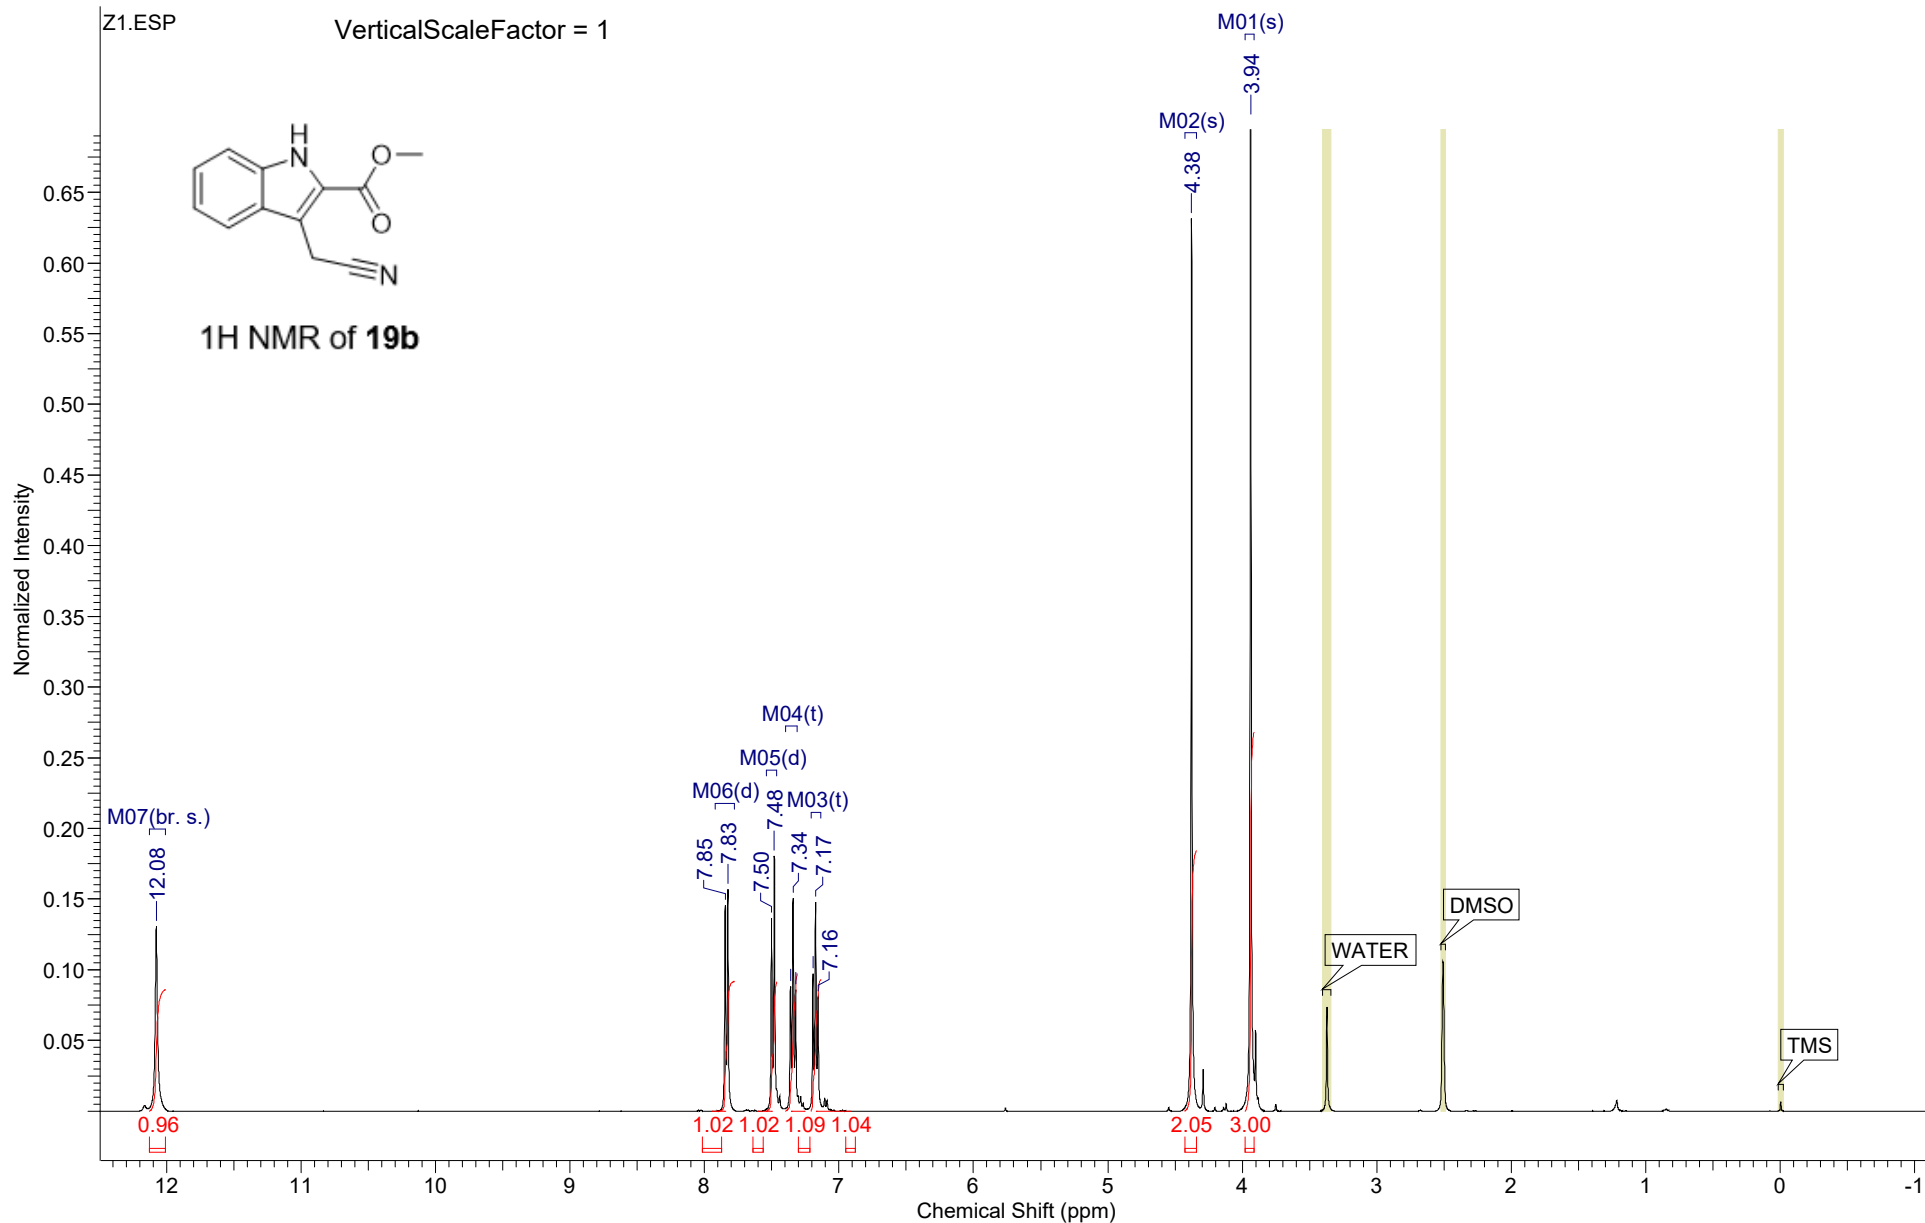

|                        |                                   |                      |                      |                       |                      |
|------------------------|-----------------------------------|----------------------|----------------------|-----------------------|----------------------|
| Acquisition Time (sec) | 1.3631                            | Date                 | 23 Sep 2017 12:31:12 | Date Stamp            | 23 Sep 2017 12:31:12 |
| File Name              | D:\CJO-UCSF\NMR\CJO-Z1\CARBON\fid | Frequency (MHz)      | 100.63               | Nucleus               | 13C                  |
| Number of Transients   | 2000                              | Origin               | spect                | Original Points Count | 32768                |
| Points Count           | 32768                             | Pulse Sequence       | zgpg30               | Receiver Gain         | 196.40               |
| Solvent                | DMSO-d6                           | Spectrum Offset (Hz) | 10061.7803           | Spectrum Type         | STANDARD             |
| Temperature (degree C) | 23.130                            | SW(cyclical) (Hz)    |                      | Sweep Width (Hz)      | 24037.73             |

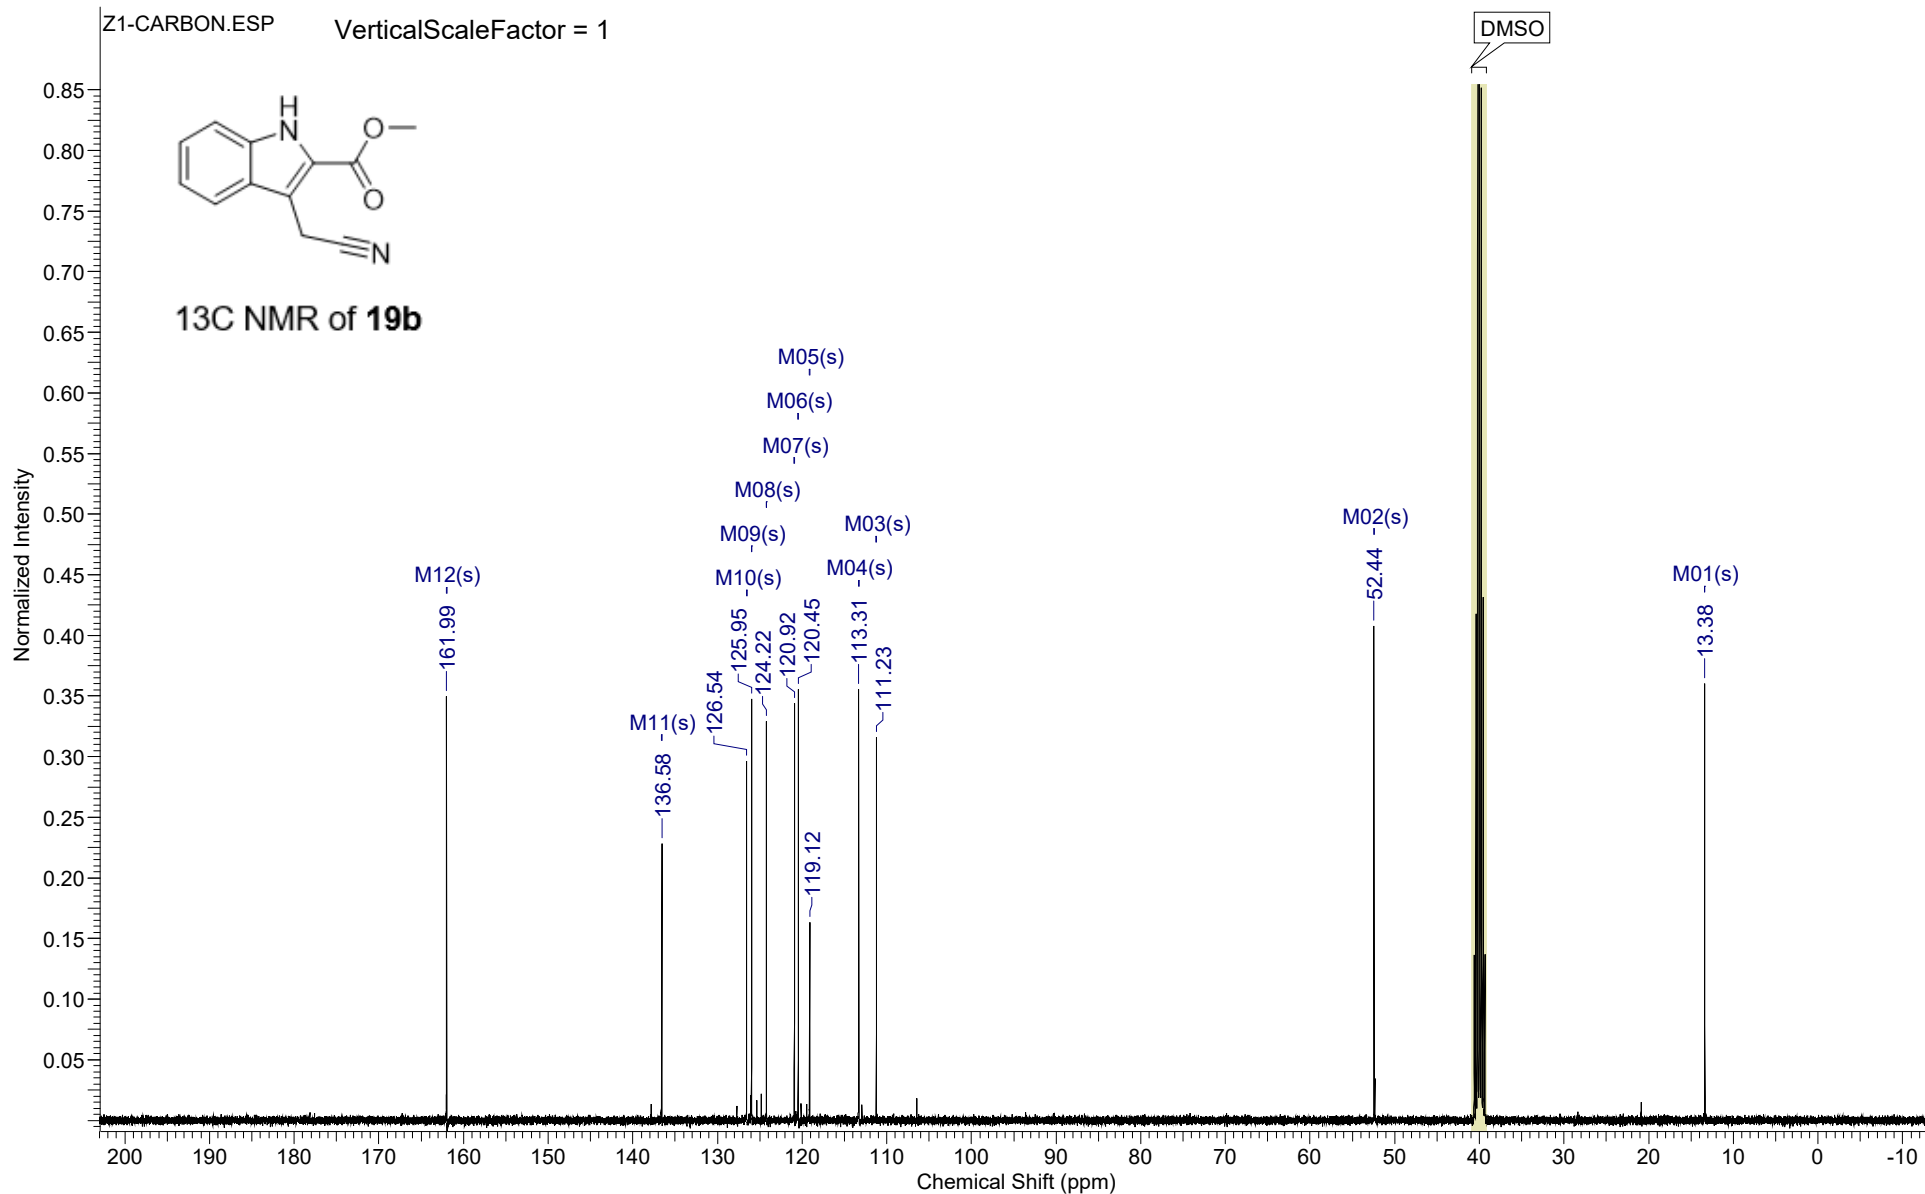

|                               |                              |                               |                      |                      |                      |                             |           |
|-------------------------------|------------------------------|-------------------------------|----------------------|----------------------|----------------------|-----------------------------|-----------|
| <b>Acquisition Time (sec)</b> | 4.0894                       | <b>Date</b>                   | 19 Sep 2017 08:34:24 | <b>Date Stamp</b>    | 19 Sep 2017 08:34:24 |                             |           |
| <b>File Name</b>              | D:\CJO-UCSF\NMR\CJO-X1\1\fid | <b>Frequency (MHz)</b>        | 400.15               | <b>Nucleus</b>       | 1H                   | <b>Number of Transients</b> | 16        |
| <b>Origin</b>                 | spect                        | <b>Original Points Count</b>  | 32768                | <b>Owner</b>         | IND-NMR              | <b>Points Count</b>         | 32768     |
| <b>Receiver Gain</b>          | 70.44                        | <b>SW(cyclical) (Hz)</b>      | 8012.82              | <b>Solvent</b>       | DMSO-d6              | <b>Spectrum Offset (Hz)</b> | 2470.9260 |
| <b>Sweep Width (Hz)</b>       | 8012.58                      | <b>Temperature (degree C)</b> | 22.639               | <b>Spectrum Type</b> | STANDARD             |                             |           |

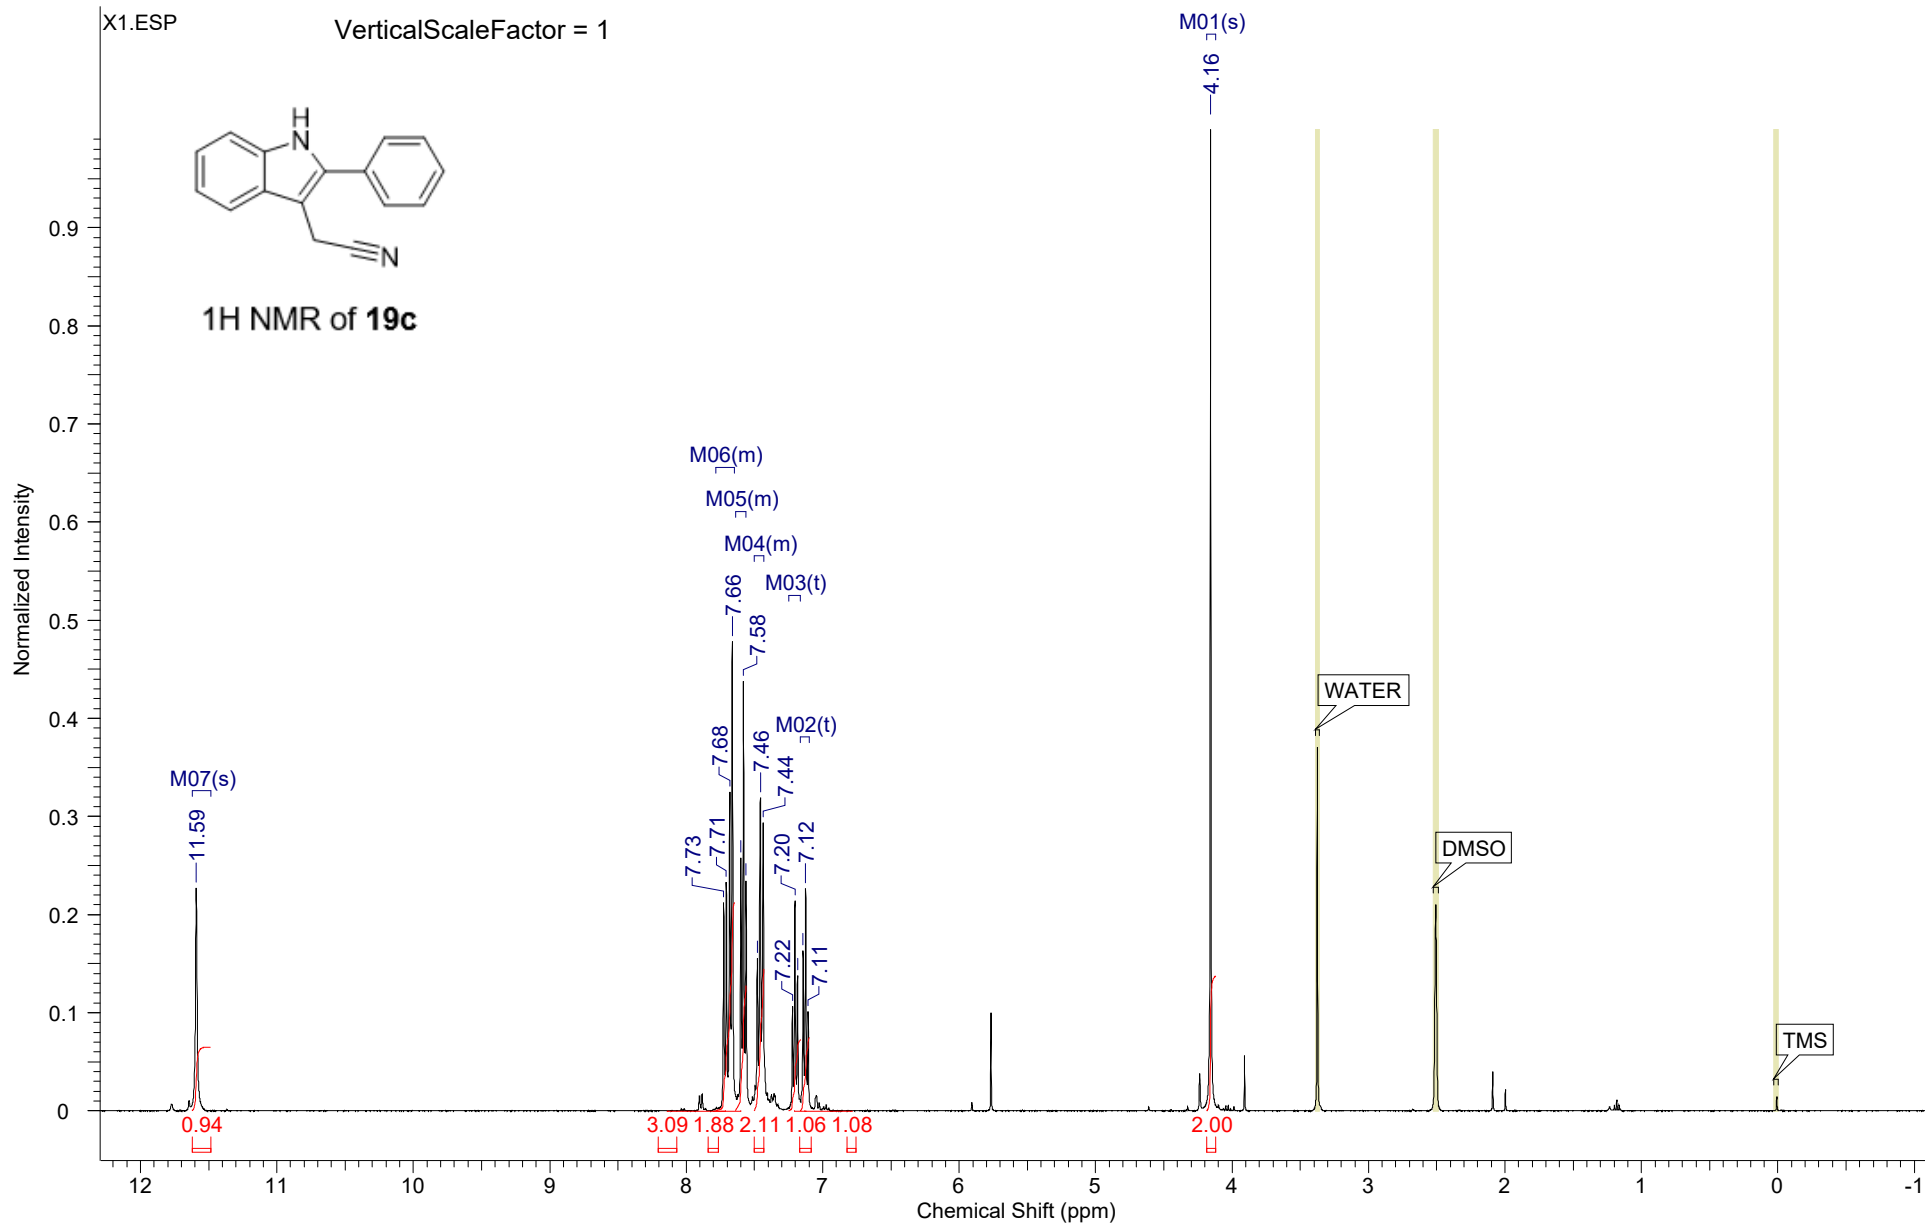

|                               |                                   |                             |                      |                              |                      |
|-------------------------------|-----------------------------------|-----------------------------|----------------------|------------------------------|----------------------|
| <b>Acquisition Time (sec)</b> | 1.3631                            | <b>Date</b>                 | 20 Sep 2017 01:55:28 | <b>Date Stamp</b>            | 20 Sep 2017 01:55:28 |
| <b>File Name</b>              | D:\CJO-UCSF\NMR\CJO-X1\CARBON\fid | <b>Frequency (MHz)</b>      | 100.63               | <b>Nucleus</b>               | <sup>13</sup> C      |
| <b>Number of Transients</b>   | 2000                              | <b>Origin</b>               | spect                | <b>Original Points Count</b> | 32768                |
| <b>Points Count</b>           | 32768                             | <b>Pulse Sequence</b>       | zgpg30               | <b>Receiver Gain</b>         | 196.40               |
| <b>Solvent</b>                | DMSO-d6                           | <b>Spectrum Offset (Hz)</b> | 10061.7803           | <b>Spectrum Type</b>         | STANDARD             |
| <b>Temperature (degree C)</b> | 22.973                            |                             |                      | <b>Sweep Width (Hz)</b>      | 24037.73             |

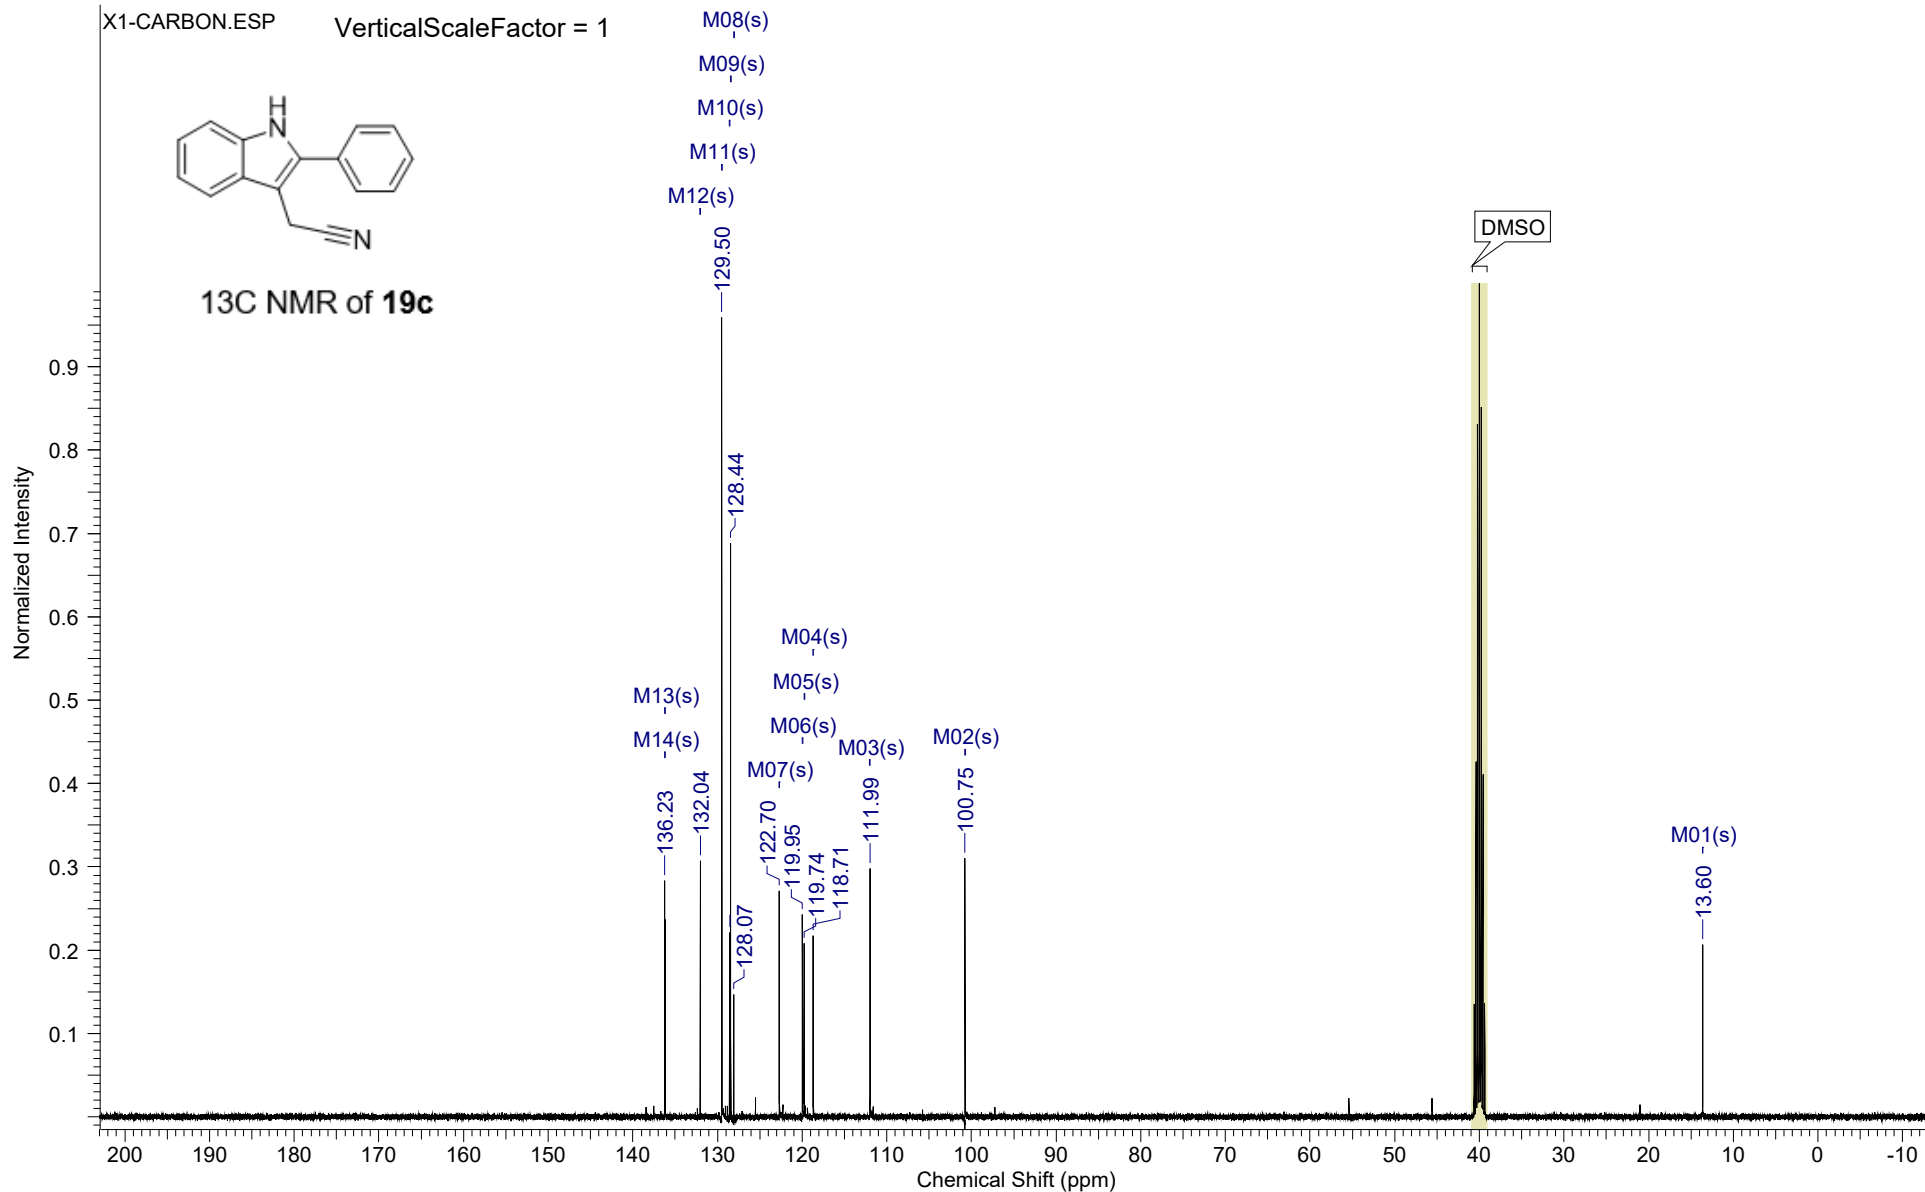



|                               |                              |                               |                      |                             |                      |
|-------------------------------|------------------------------|-------------------------------|----------------------|-----------------------------|----------------------|
| <b>Acquisition Time (sec)</b> | 4.0894                       | <b>Date</b>                   | 19 Sep 2017 08:38:40 | <b>Date Stamp</b>           | 19 Sep 2017 08:38:40 |
| <b>File Name</b>              | D:\CJO-UCSF\NMR\CJO-Y1\1\fid | <b>Frequency (MHz)</b>        | 400.15               | <b>Nucleus</b>              | <sup>1</sup> H       |
| <b>Origin</b>                 | spect                        | <b>Original Points Count</b>  | 32768                | <b>Owner</b>                | IND-NMR              |
| <b>Receiver Gain</b>          | 97.12                        | <b>SW(cyclical) (Hz)</b>      | 8012.82              | <b>Points Count</b>         | 32768                |
| <b>Sweep Width (Hz)</b>       | 8012.58                      | <b>Temperature (degree C)</b> | 22.630               | <b>Spectrum Offset (Hz)</b> | 2470.9260            |
|                               |                              |                               |                      | <b>Spectrum Type</b>        | STANDARD             |

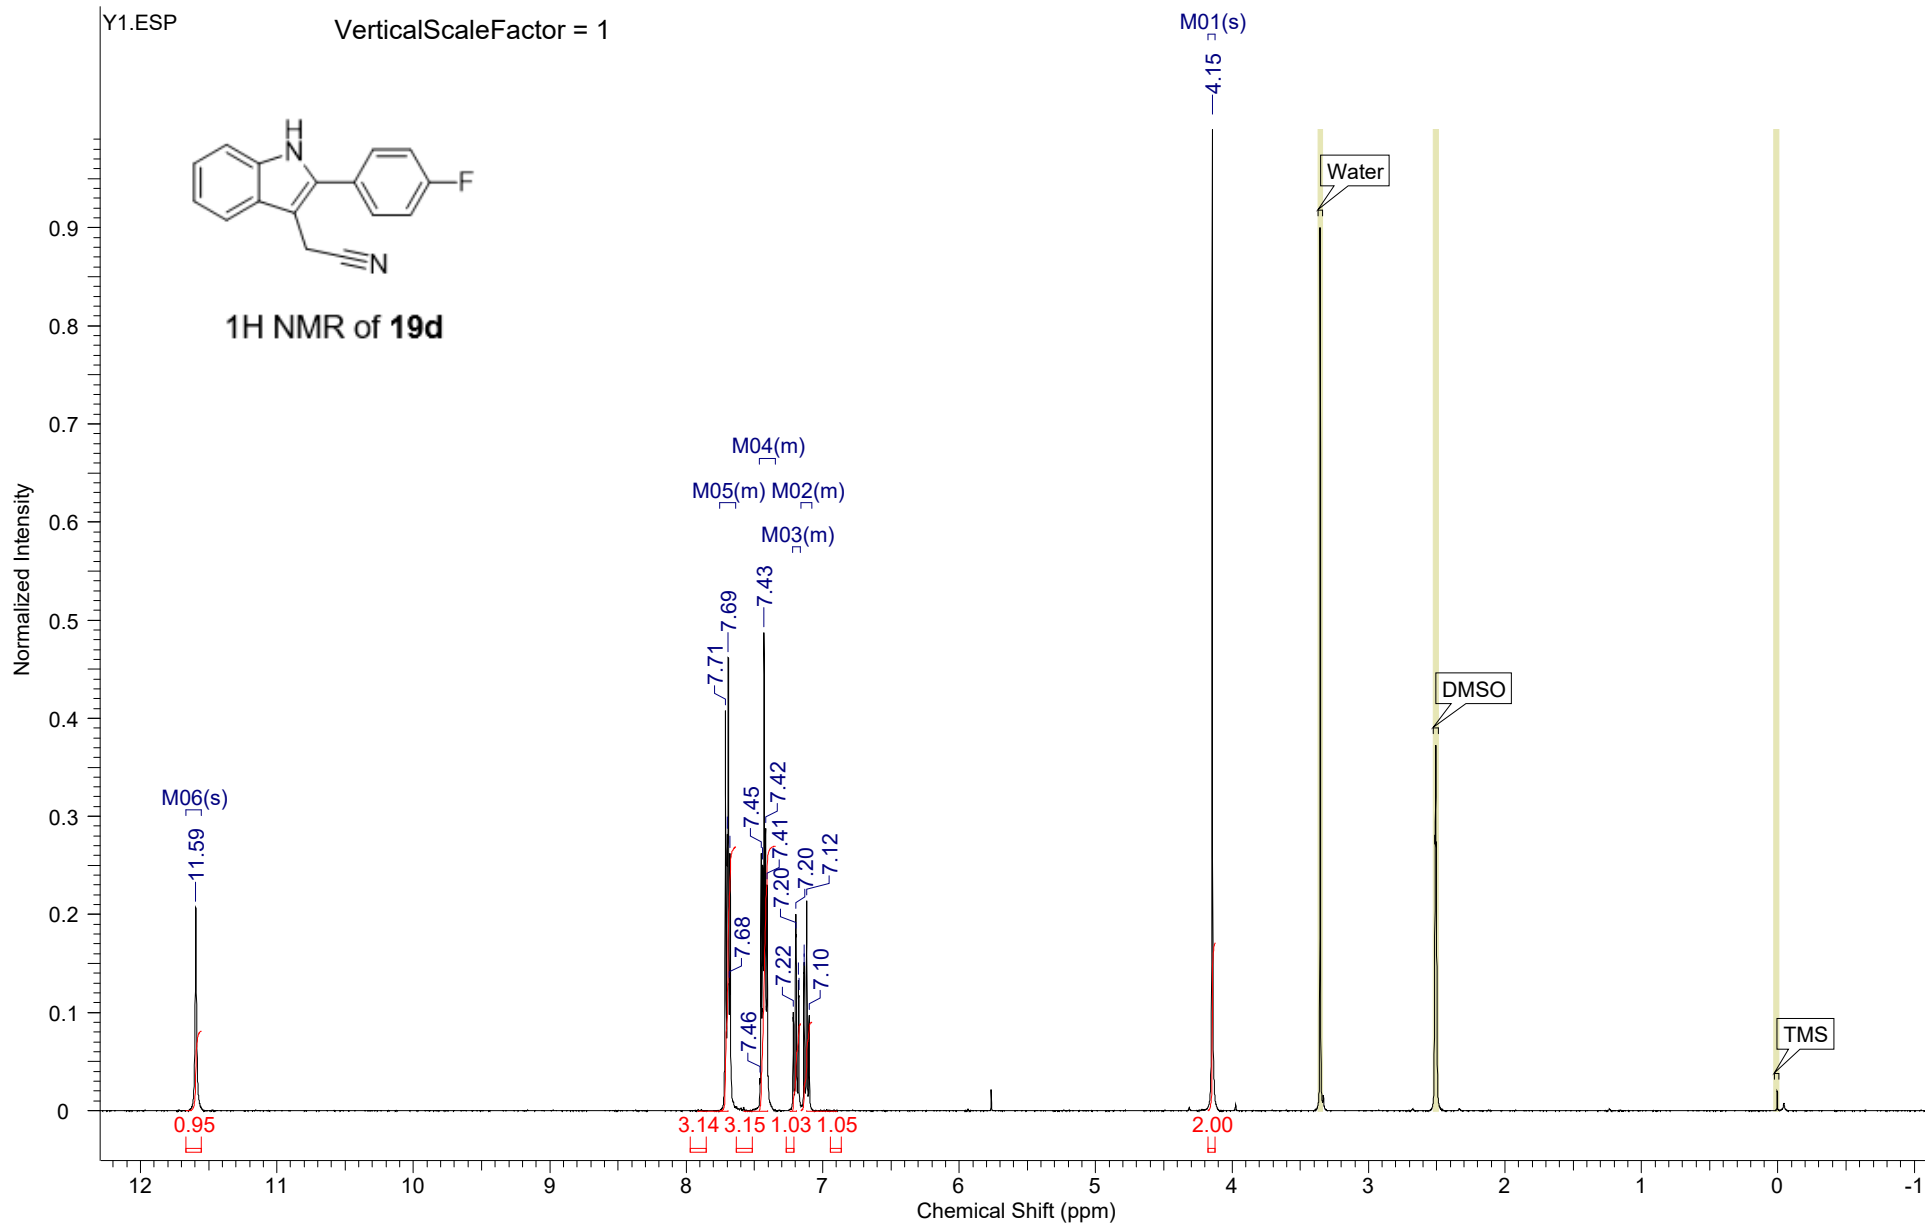

|                        |                                   |                      |                      |                       |                      |
|------------------------|-----------------------------------|----------------------|----------------------|-----------------------|----------------------|
| Acquisition Time (sec) | 1.3631                            | Date                 | 20 Sep 2017 03:50:40 | Date Stamp            | 20 Sep 2017 03:50:40 |
| File Name              | D:\CJO-UCSF\NMR\CJO-Y1\CARBON\fid | Frequency (MHz)      | 100.63               | Nucleus               | 13C                  |
| Number of Transients   | 2000                              | Origin               | spect                | Original Points Count | 32768                |
| Points Count           | 32768                             | Pulse Sequence       | zgpg30               | Receiver Gain         | 196.40               |
| Solvent                | DMSO-d6                           | Spectrum Offset (Hz) | 10061.7803           | Spectrum Type         | STANDARD             |
| Temperature (degree C) | 23.037                            | SW(cyclical) (Hz)    |                      | Sweep Width (Hz)      | 24037.73             |

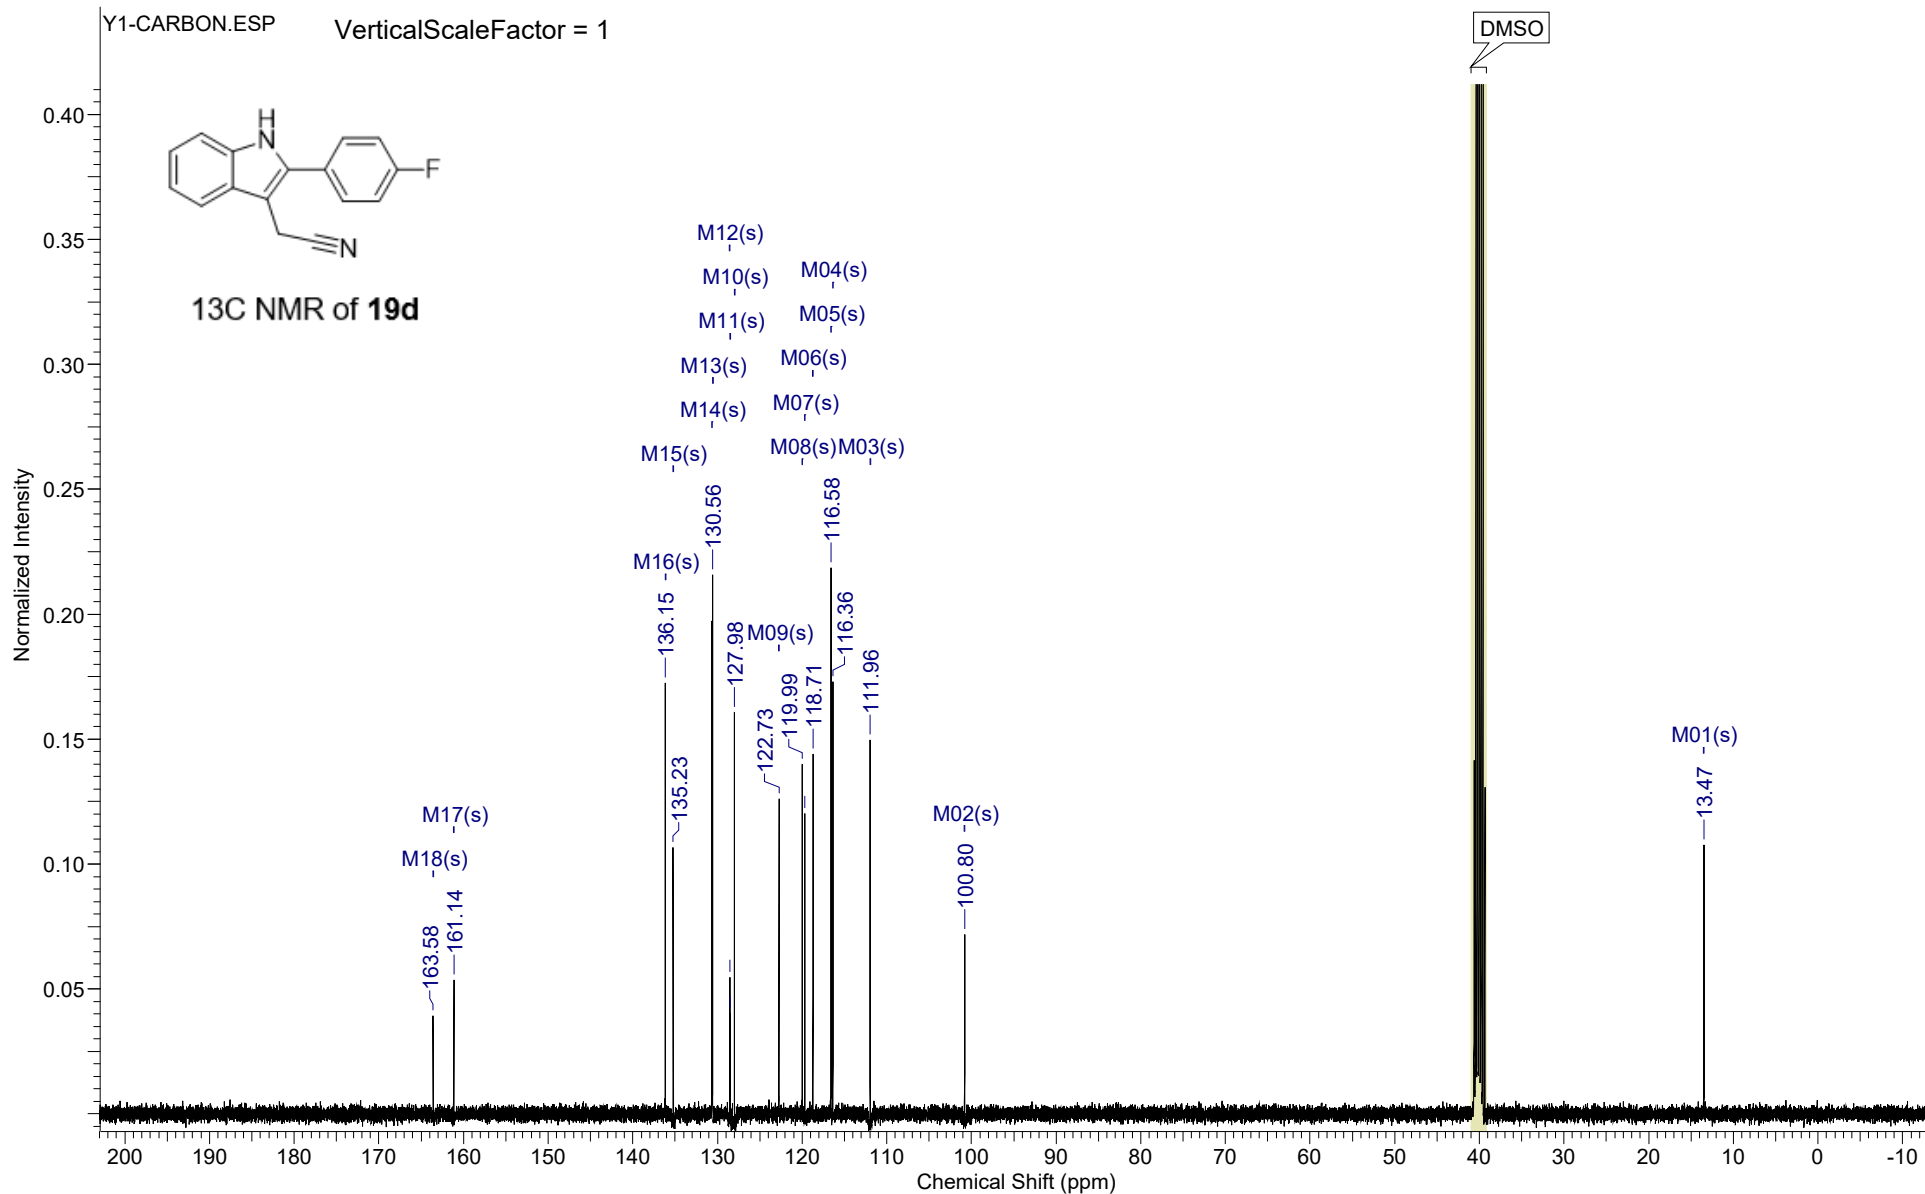

|                        |                              |                        |                      |                      |                      |
|------------------------|------------------------------|------------------------|----------------------|----------------------|----------------------|
| Acquisition Time (sec) | 4.0894                       | Date                   | 23 Sep 2017 12:35:28 | Date Stamp           | 23 Sep 2017 12:35:28 |
| File Name              | D:\CJO-UCSF\NMR\CJO-A2\1\fid | Frequency (MHz)        | 400.15               | Nucleus              | <sup>1</sup> H       |
| Origin                 | spect                        | Original Points Count  | 32768                | Owner                | IND-NMR              |
| Receiver Gain          | 56.60                        | SW(cyclical) (Hz)      | 8012.82              | Points Count         | 32768                |
| Sweep Width (Hz)       | 8012.58                      | Temperature (degree C) | 22.636               | Spectrum Offset (Hz) | 2470.9260            |
|                        |                              |                        |                      | Number of Transients | 32                   |
|                        |                              |                        |                      | Pulse Sequence       | zg30                 |
|                        |                              |                        |                      | Solvent              | DMSO-d6              |
|                        |                              |                        |                      | Spectrum Type        | STANDARD             |

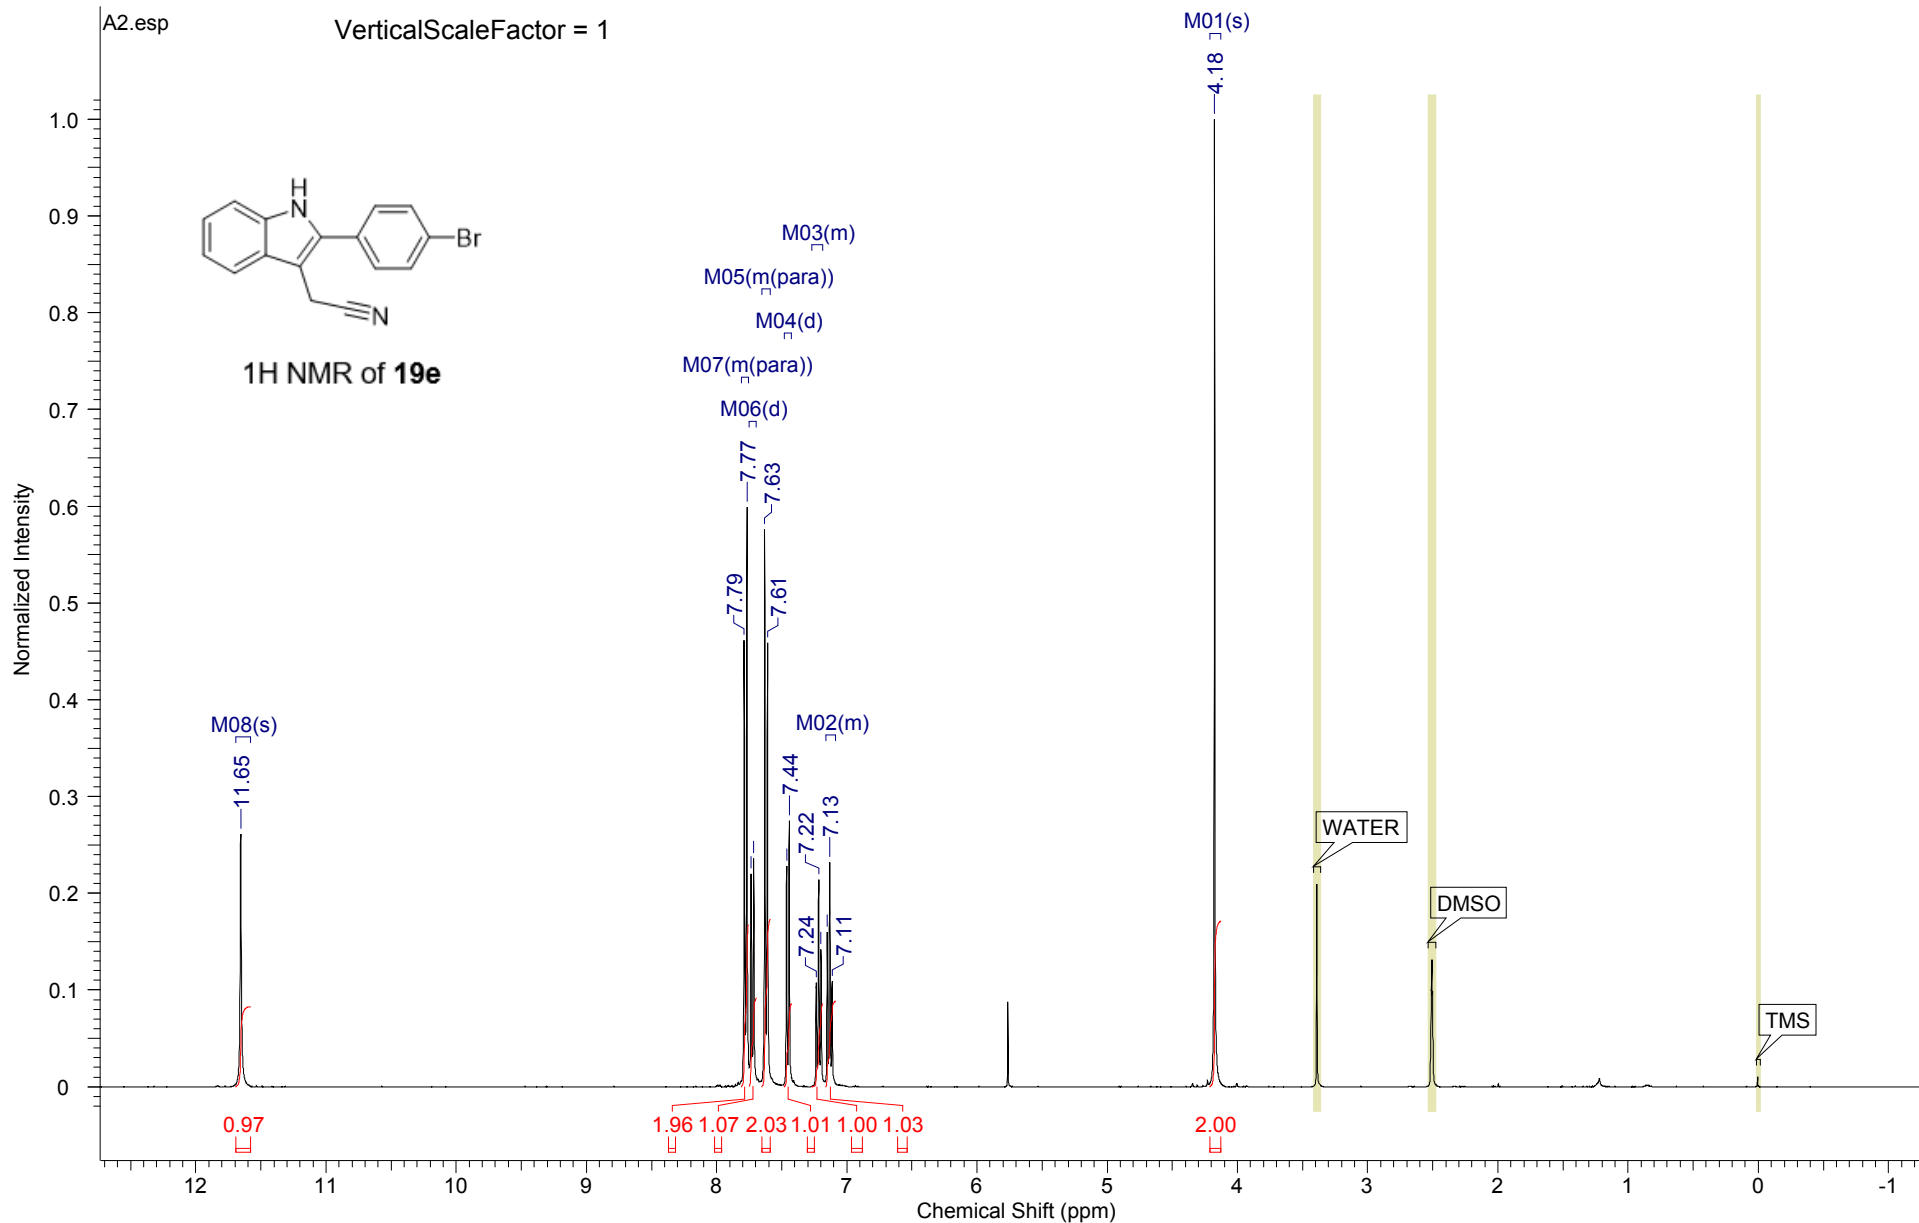

|                        |                                   |                      |                      |                       |                      |
|------------------------|-----------------------------------|----------------------|----------------------|-----------------------|----------------------|
| Acquisition Time (sec) | 1.3631                            | Date                 | 23 Sep 2017 14:30:40 | Date Stamp            | 23 Sep 2017 14:30:40 |
| File Name              | D:\CJO-UCSF\NMR\CJO-A2\CARBON\fid | Frequency (MHz)      | 100.63               | Nucleus               | 13C                  |
| Number of Transients   | 2000                              | Origin               | spect                | Original Points Count | 32768                |
| Points Count           | 32768                             | Pulse Sequence       | zgpg30               | Receiver Gain         | 196.40               |
| Solvent                | DMSO-d6                           | Spectrum Offset (Hz) | 10061.7803           | Spectrum Type         | STANDARD             |
| Temperature (degree C) | 23.354                            | SW(cyclical) (Hz)    |                      | Sweep Width (Hz)      | 24037.73             |

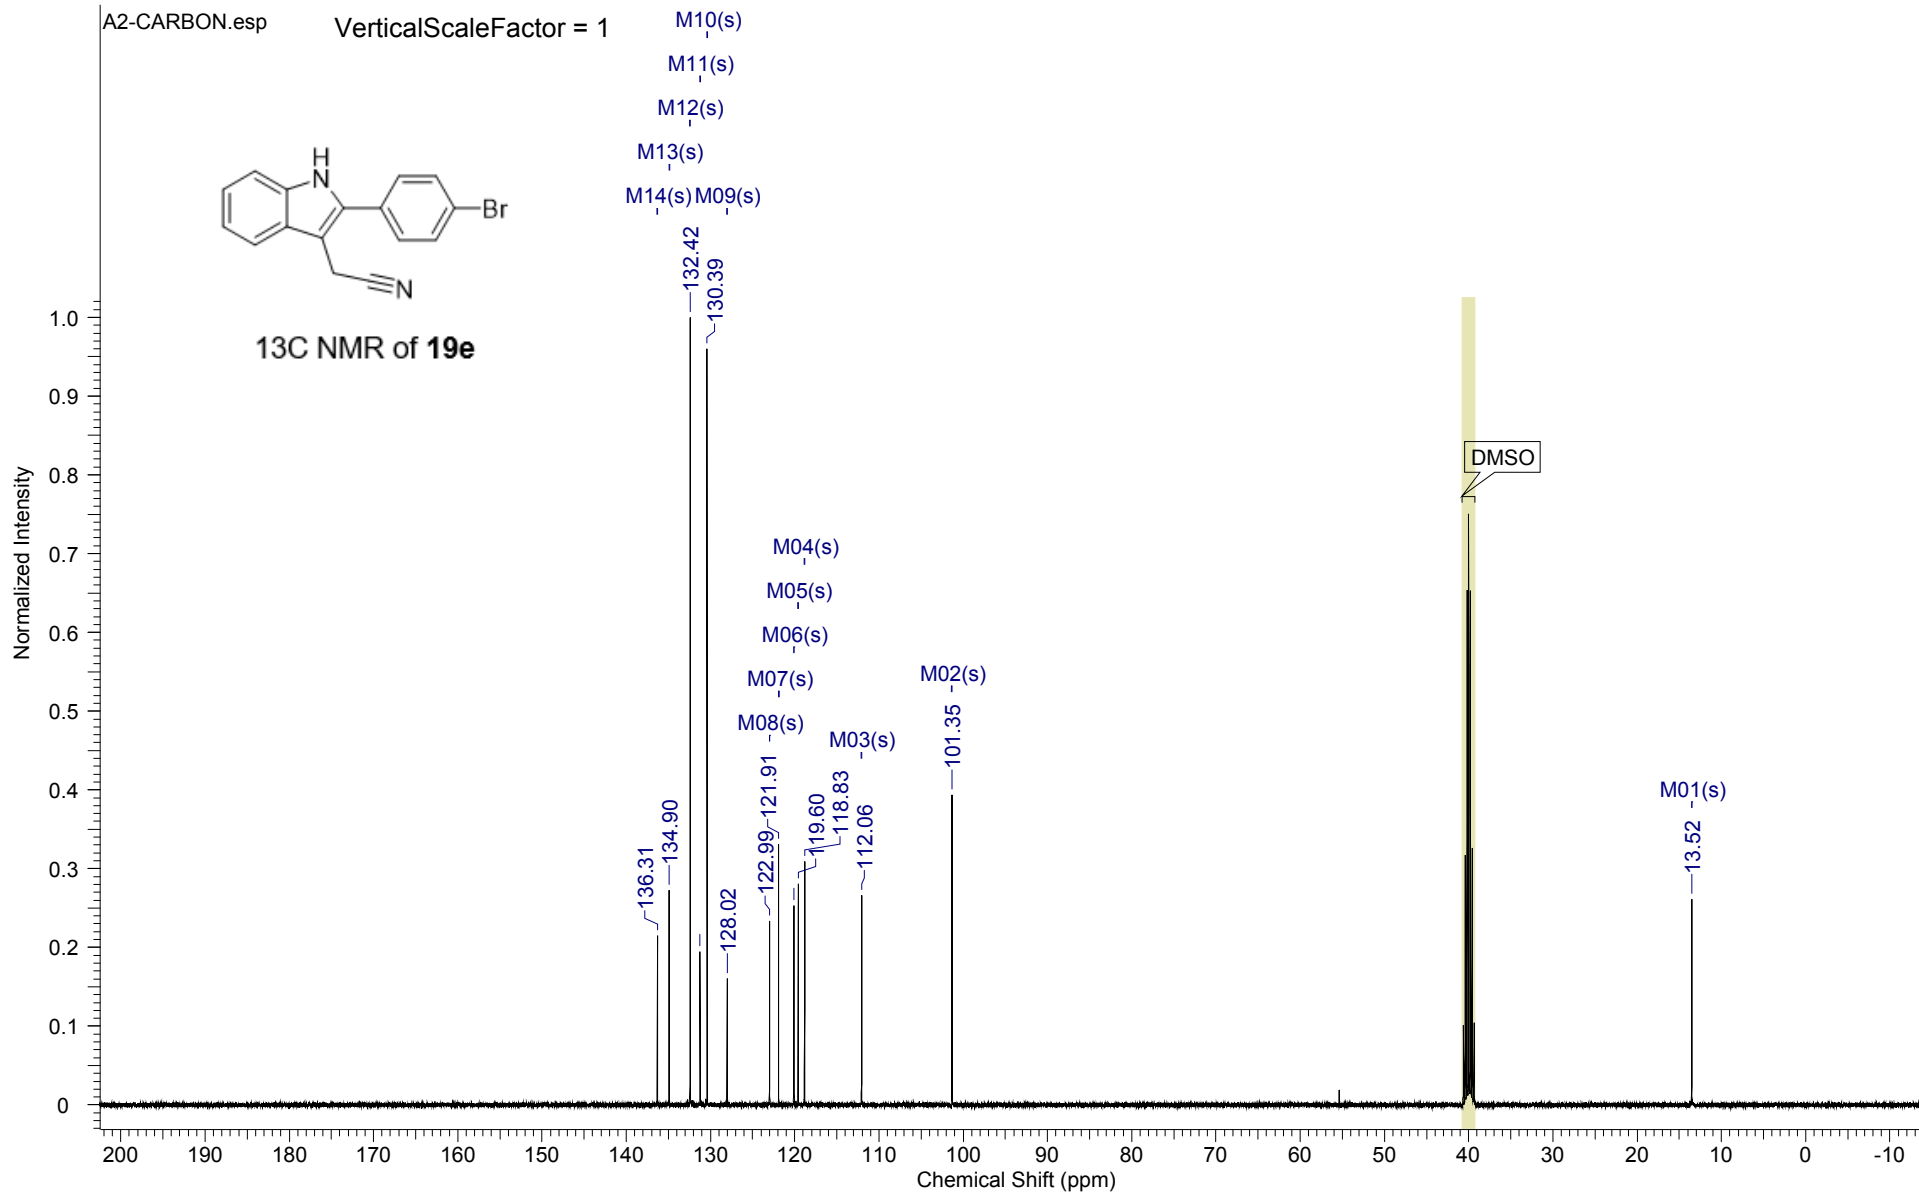

|                        |                              |                        |                      |                      |                      |
|------------------------|------------------------------|------------------------|----------------------|----------------------|----------------------|
| Acquisition Time (sec) | 4.0894                       | Date                   | 29 Aug 2017 08:40:48 | Date Stamp           | 29 Aug 2017 08:40:48 |
| File Name              | D:\CJO-UCSF\NMR\CJO-M1\5\fid | Frequency (MHz)        | 400.15               | Nucleus              | 1H                   |
| Origin                 | spect                        | Original Points Count  | 32768                | Owner                | IND-NMR              |
| Receiver Gain          | 141.25                       | SW(cyclical) (Hz)      | 8012.82              | Points Count         | 32768                |
| Sweep Width (Hz)       | 8012.58                      | Temperature (degree C) | 22.583               | Solvent              | DMSO-d6              |
|                        |                              |                        |                      | Spectrum Offset (Hz) | 2470.9260            |
|                        |                              |                        |                      | Spectrum Type        | STANDARD             |

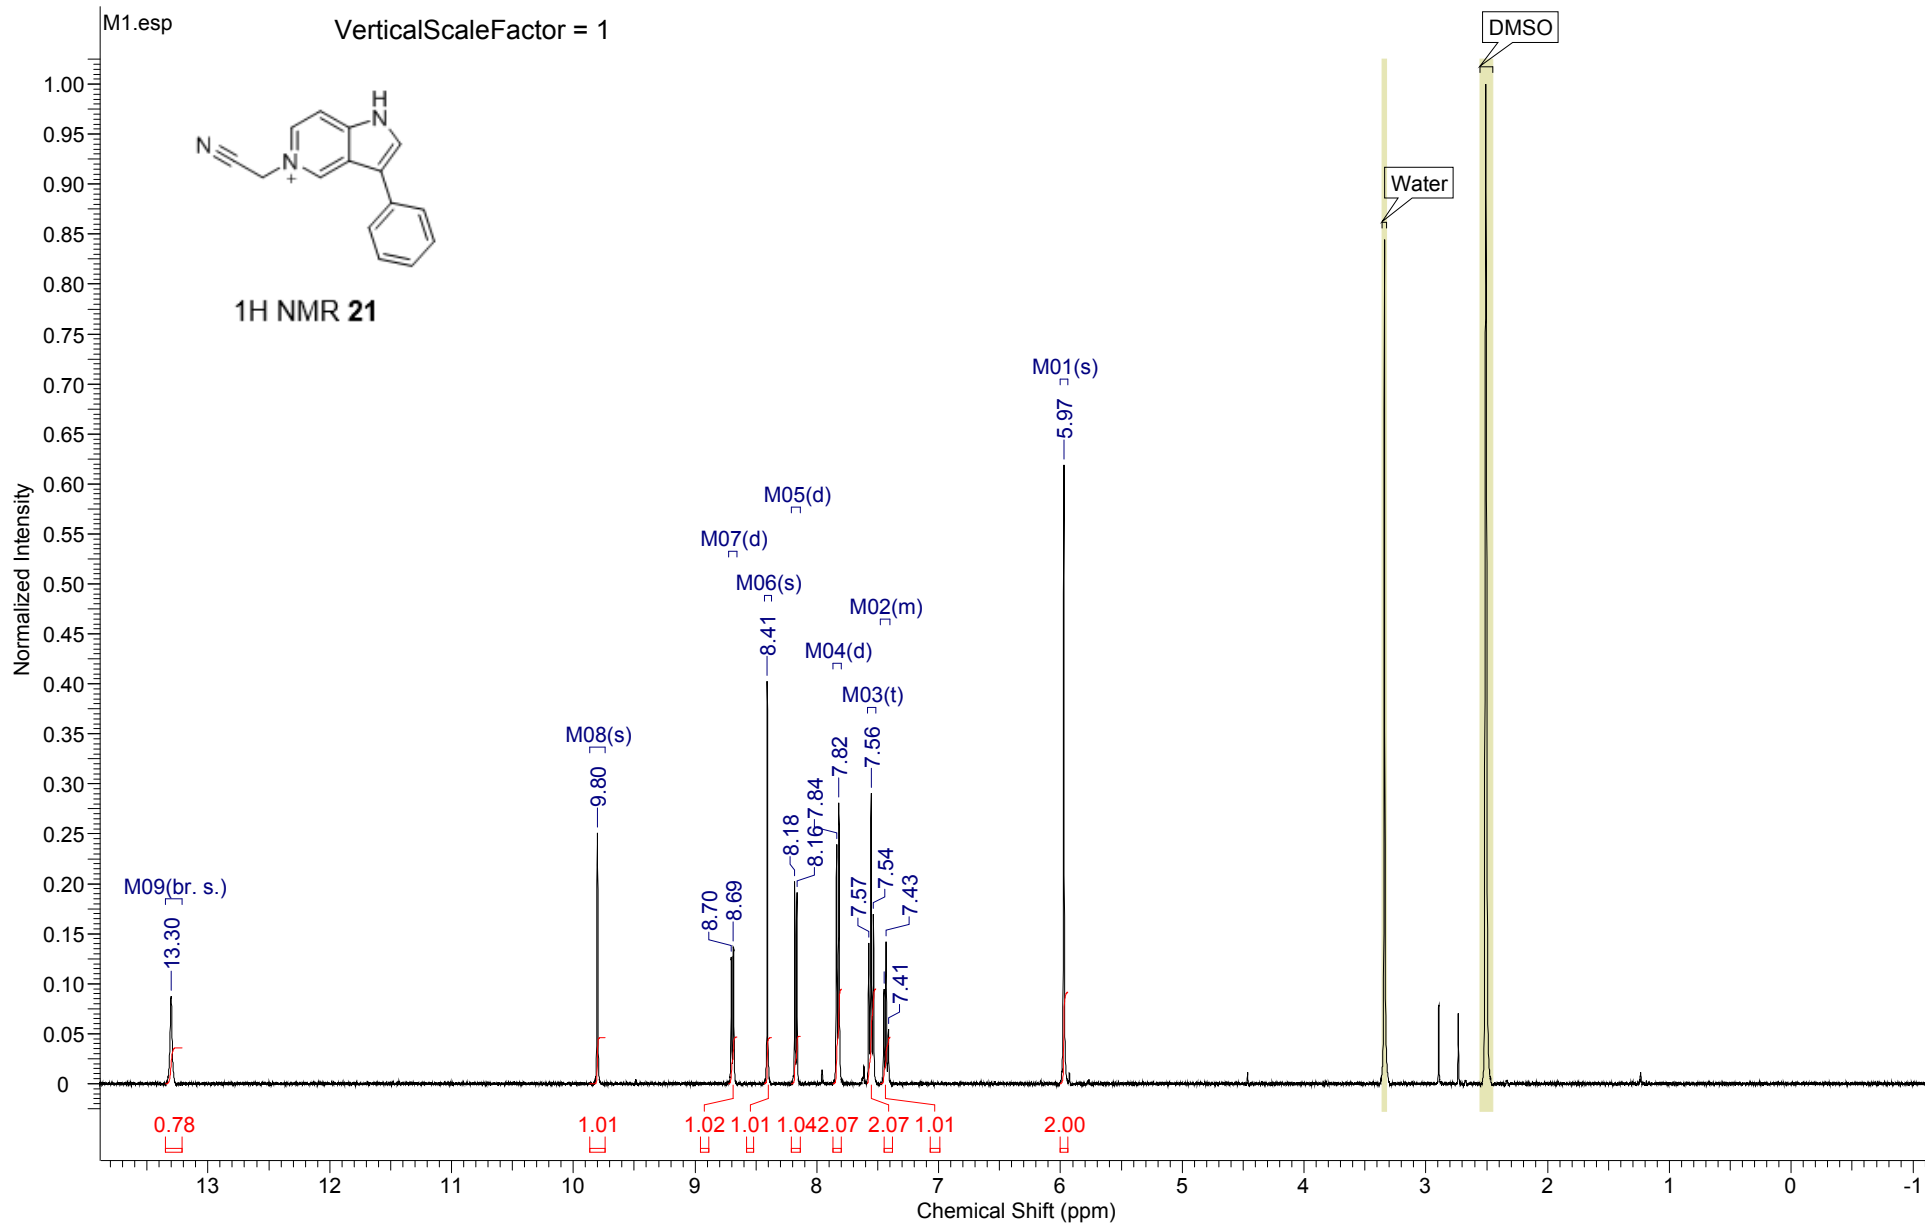

|                        |                                   |                      |                      |                       |                      |
|------------------------|-----------------------------------|----------------------|----------------------|-----------------------|----------------------|
| Acquisition Time (sec) | 1.3631                            | Date                 | 06 Sep 2017 00:57:52 | Date Stamp            | 06 Sep 2017 00:57:52 |
| File Name              | D:\CJO-UCSF\NMR\CJO-M1\CARBON.fid | Frequency (MHz)      | 100.63               | Nucleus               | <sup>13</sup> C      |
| Number of Transients   | 3000                              | Origin               | spect                | Original Points Count | 32768                |
| Points Count           | 32768                             | Pulse Sequence       | zgpg30               | Receiver Gain         | 196.40               |
| Solvent                | DMSO-d6                           | Spectrum Offset (Hz) | 10061.7803           | Spectrum Type         | STANDARD             |
| Temperature (degree C) | 23.364                            |                      |                      | Sweep Width (Hz)      | 24037.73             |

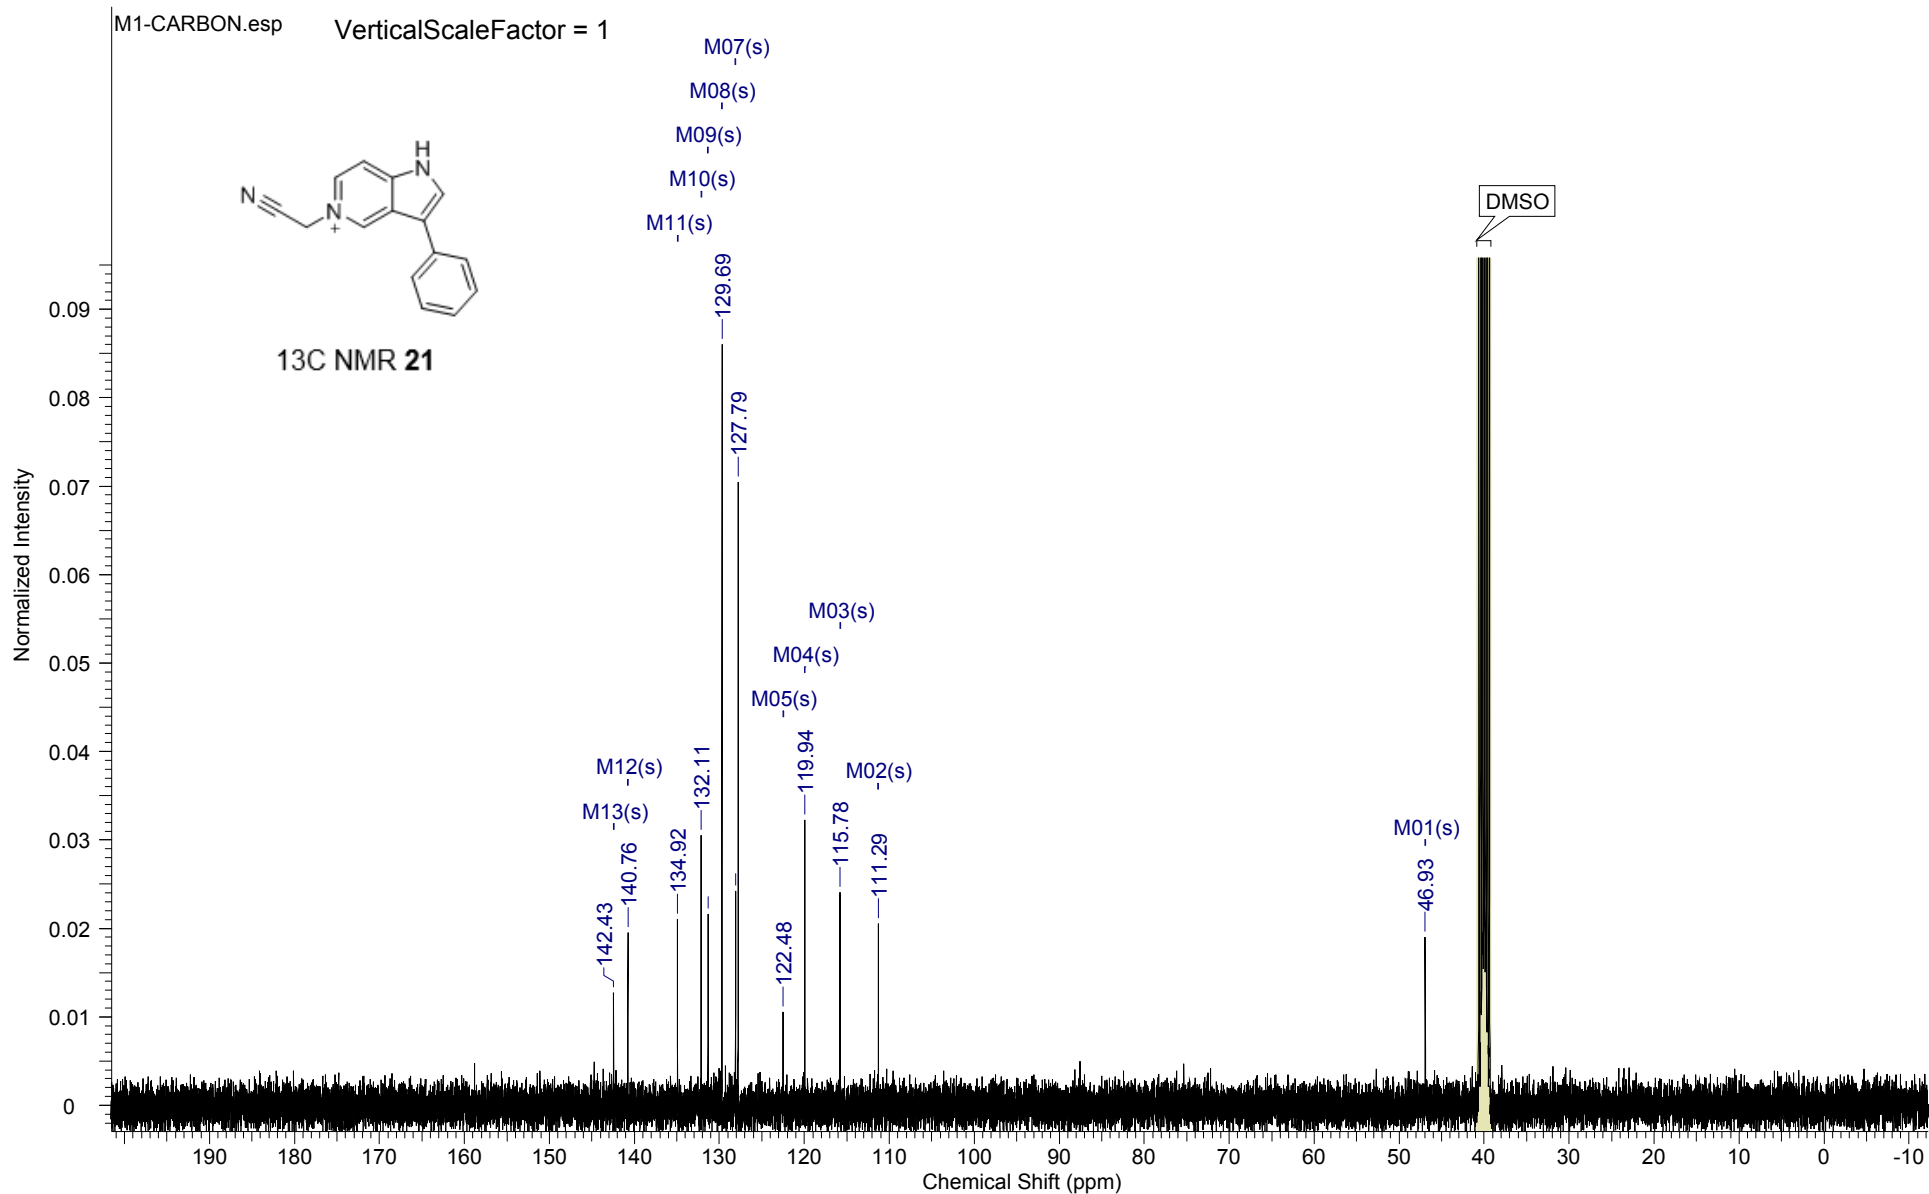

HMBC (1H-13C) NMR spectrum of 21, peak of interest, in DMSO-d6

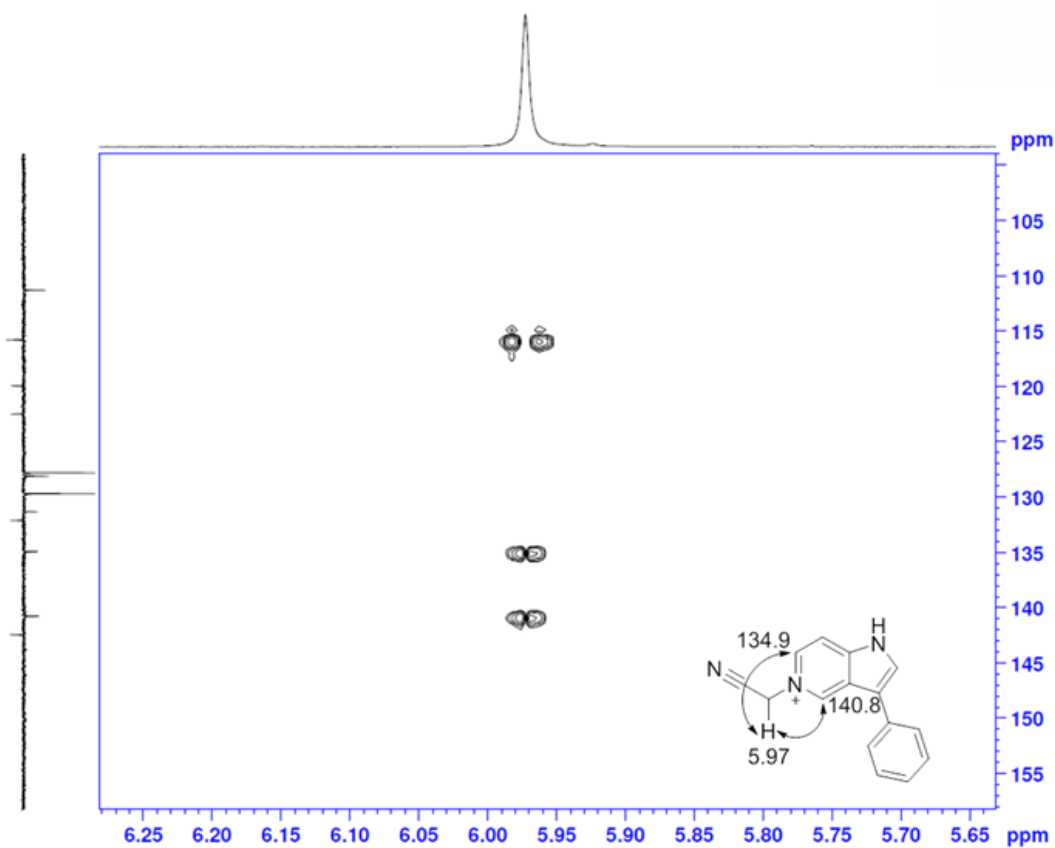

```

Current Data Parameters
NAME          q-1
EXPNO        1
PROCNO       1

F2 - Acquisition Parameters
Date_        20110330
Time         22.04 h
INSTRUM     spect
PROBHD      5114098.013 1
PULPROG     hmcwetpl1ed
TD           4874
SOLVENT     DMSO
NS           14
DS           14
SWH          5197.505 Hz
FIDRES      2.537844 Hz
AQ           0.3940332 sec
RG           194.4
CW           94.200 usec
DE           6.50 usec
TE           298.4 K
CNS16       120.000000
CNS17       170.000000
CNS13       0.000000
D0           0.0000000 sec
D1           2.0000000 sec
D4           0.04210000 sec
D14         0.00020000 sec
D16         0.00020000 sec
TDev        1
SF01        400.1523008 MHz
NUC1        13C
P1          10.00 usec
P2          20.00 usec
PAM1       14.74199943 W
SF02        100.6278593 MHz
NUC2        13C
P3          10.00 usec
P4          2000.00 usec
PAM2       72.84900330 W
SFOCAL1    Cys60name.4
SFOCAL1    0.500
SFOFFS7    0 Hz
SFW        11.13399982 W
CPHASE1    80.00 %
CPHASE3    80.00 %
CPHASE4    8.00 %
CPHASE5    -8.00 %
CPHASE6    -4.00 %
CPHASE4    80.00 %
CPHASE4    80.00 %
P16        1000.00 usec

F1 - Acquisition parameters
TD         214
SF01       100.6279 MHz
FIDRES     172.842924 Hz
SW         239.359 ppm
FAMODE     Echo-Antiecho

F2 - Processing parameters
SI         2048
SF         400.1500000 MHz
WDW        SINC
SSB         4
GB         0 Hz
CB         0
PC         1.40

F1 - Processing parameters
SI         1024
MC2        echo-antiecho
SF         100.61777915 MHz
WDW        GRINE
SSB         2
GB         0 Hz
CB         0
    
```

|                        |                              |                        |                      |               |                      |                      |           |
|------------------------|------------------------------|------------------------|----------------------|---------------|----------------------|----------------------|-----------|
| Acquisition Time (sec) | 4.0894                       | Date                   | 06 Sep 2017 10:14:40 | Date Stamp    | 06 Sep 2017 10:14:40 |                      |           |
| File Name              | D:\CJO-UCSF\NMR\CJO-Q1\5\fid | Frequency (MHz)        | 400.15               | Nucleus       | 1H                   | Number of Transients | 30        |
| Origin                 | spect                        | Original Points Count  | 32768                | Owner         | IND-NMR              | Points Count         | 32768     |
| Receiver Gain          | 141.25                       | SW(cyclical) (Hz)      | 8012.82              | Solvent       | DMSO-d6              | Spectrum Offset (Hz) | 2470.9255 |
| Sweep Width (Hz)       | 8012.58                      | Temperature (degree C) | 22.624               | Spectrum Type | STANDARD             |                      |           |

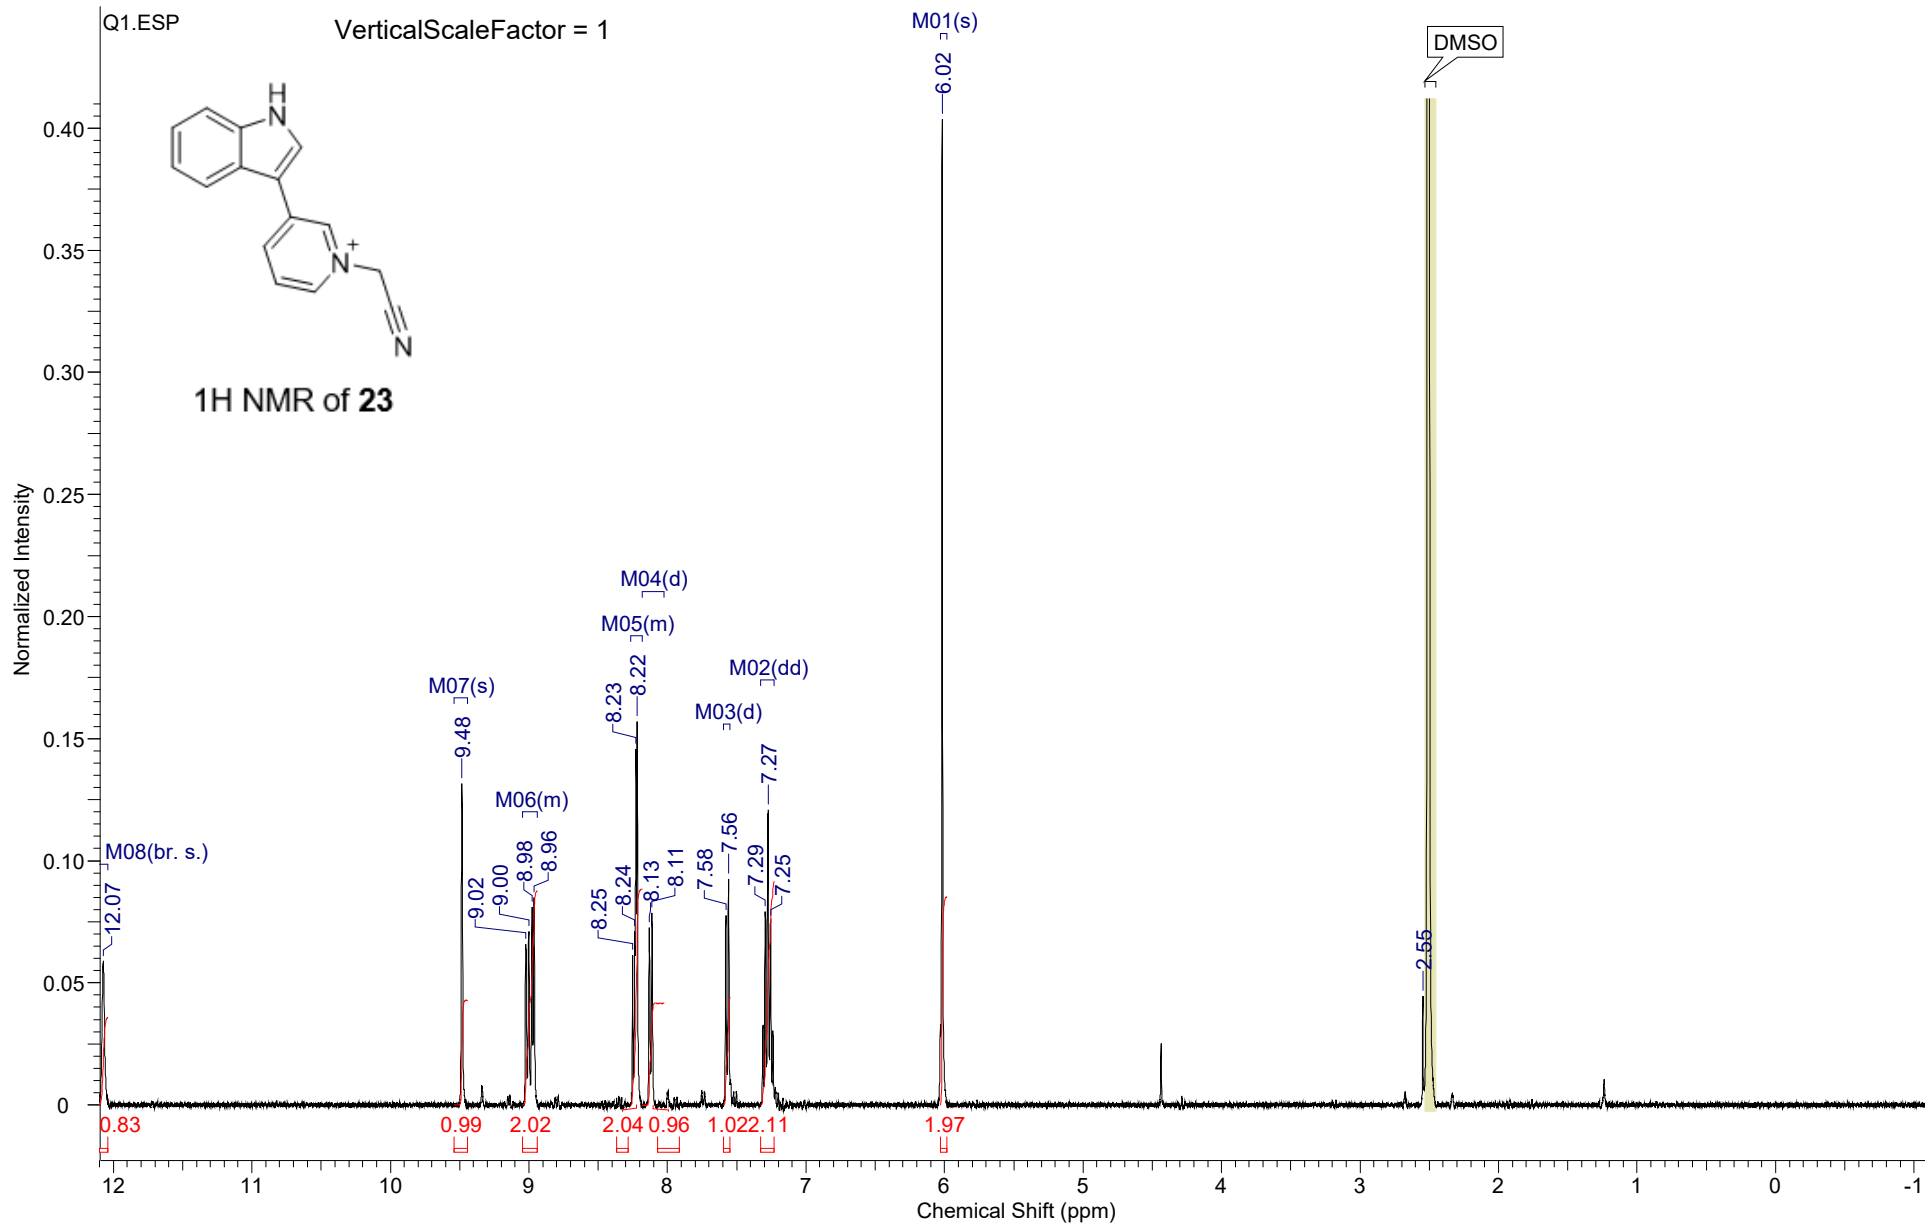



|                               |                                   |                             |                      |                              |                      |
|-------------------------------|-----------------------------------|-----------------------------|----------------------|------------------------------|----------------------|
| <b>Acquisition Time (sec)</b> | 1.3631                            | <b>Date</b>                 | 04 Oct 2017 23:56:00 | <b>Date Stamp</b>            | 04 Oct 2017 23:56:00 |
| <b>File Name</b>              | D:\CJO-UCSF\NMR\CJO-Q1\CARBON\fid | <b>Frequency (MHz)</b>      | 100.63               | <b>Nucleus</b>               | 13C                  |
| <b>Number of Transients</b>   | 2000                              | <b>Origin</b>               | spect                | <b>Original Points Count</b> | 32768                |
| <b>Points Count</b>           | 32768                             | <b>Pulse Sequence</b>       | zgpg30               | <b>Receiver Gain</b>         | 196.40               |
| <b>Solvent</b>                | DMSO-d6                           | <b>Spectrum Offset (Hz)</b> | 10061.7803           | <b>Spectrum Type</b>         | STANDARD             |
| <b>Temperature (degree C)</b> | 23.313                            |                             |                      | <b>Sweep Width (Hz)</b>      | 24037.73             |

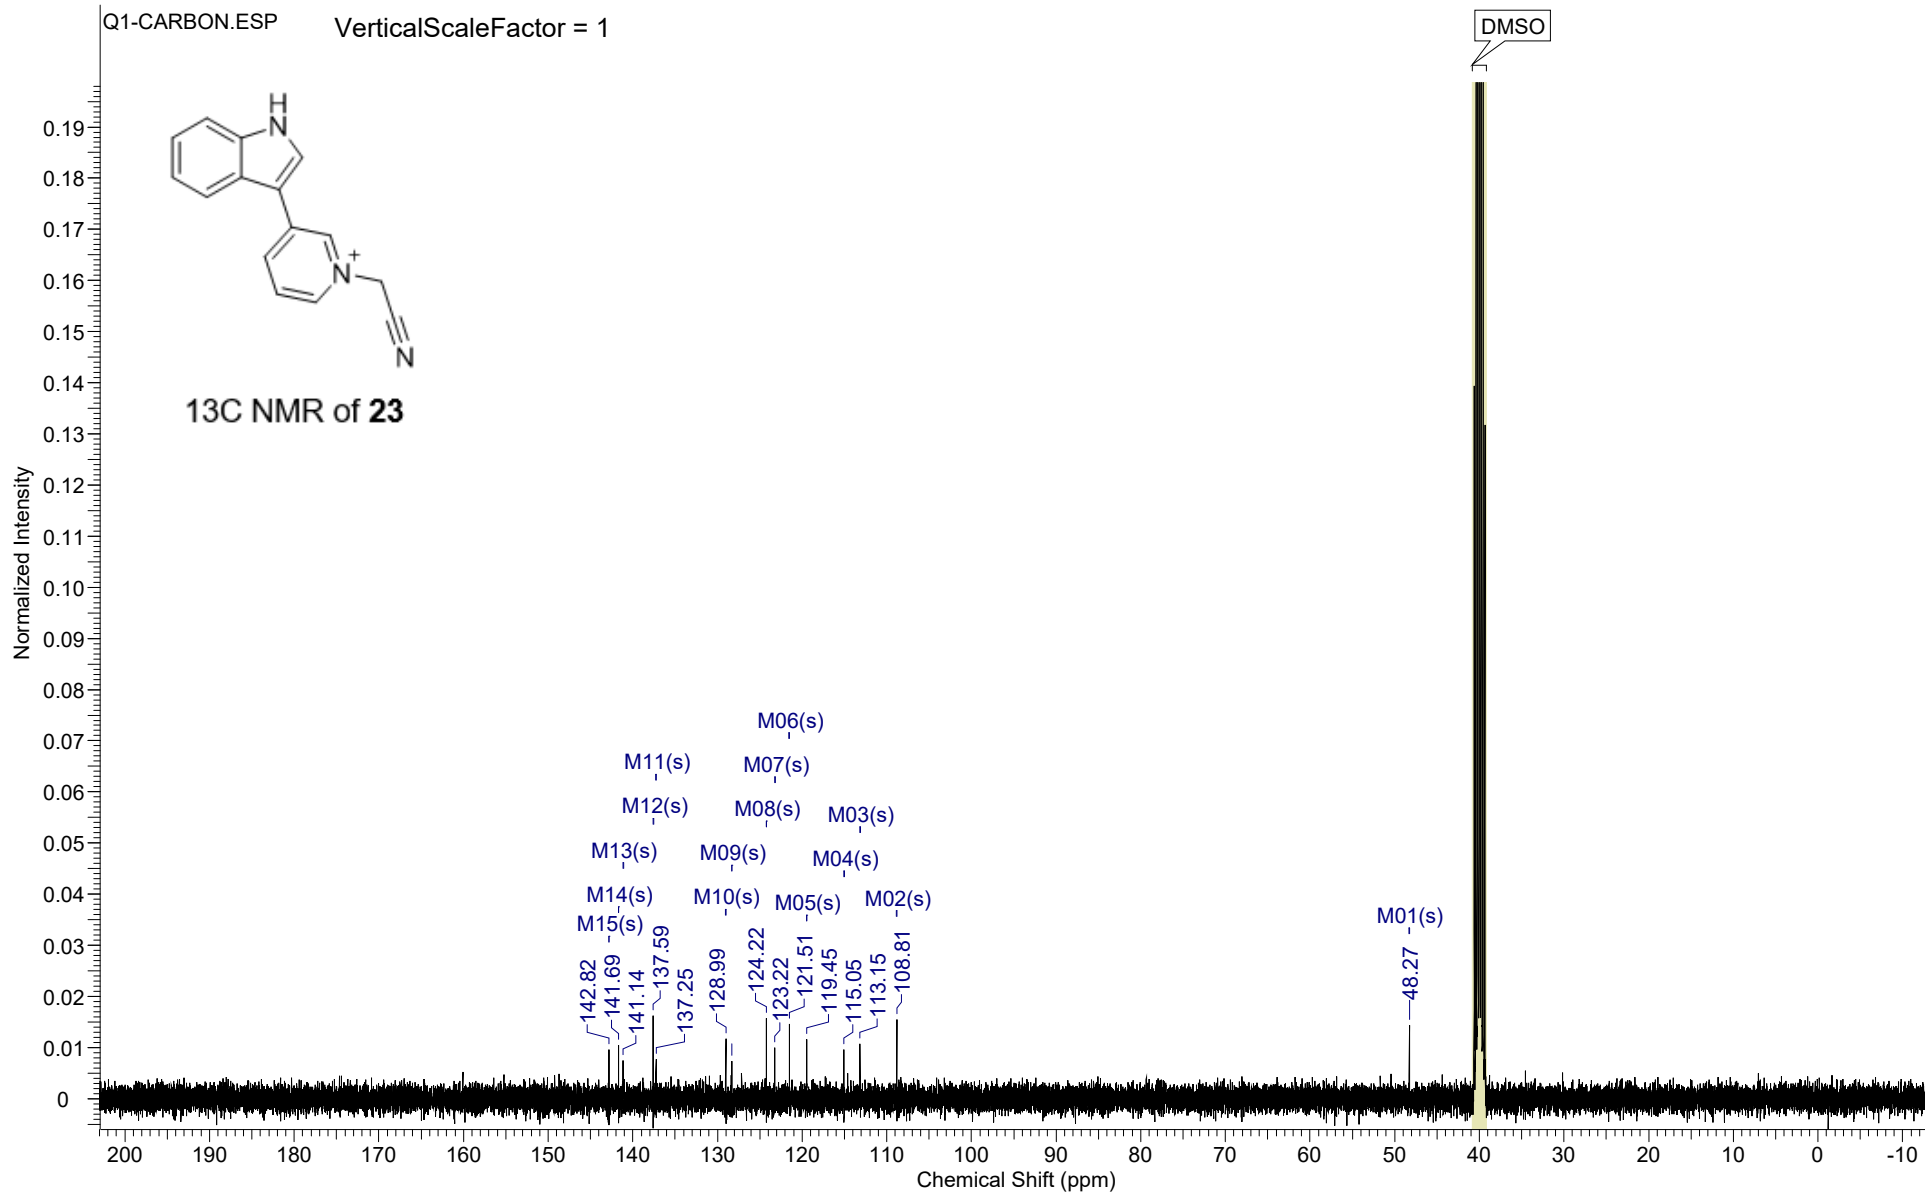

# Organic LETTERS

## RECOMMENDED COMPOUND CHARACTERIZATION CHECKLIST

**NOTE: CHECKLIST IS RECOMMENDED BUT NOT REQUIRED**

|                      |                                                              |                |
|----------------------|--------------------------------------------------------------|----------------|
| Corresponding Author |                                                              | ol-            |
|                      |                                                              | Dr. Jay Conrad |
| Title                | Rapid Access to Cyanomethyl Indoles via Photoredox Catalysis |                |

TO DISPLAY INSTRUCTIONS: Double-click HERE (Formula Bar must be visible: Select View>Formula Bar) TO CLOSE: Enter/Return

| COMPOUND                                   | IDENTITY |       |                     |    |        |                    |                     |     |    |      |                         | PURITY                            |                                |                                                             |                             | COMPUTATIONAL DATA in SI*           |                    |                                   |                            |              |                        |
|--------------------------------------------|----------|-------|---------------------|----|--------|--------------------|---------------------|-----|----|------|-------------------------|-----------------------------------|--------------------------------|-------------------------------------------------------------|-----------------------------|-------------------------------------|--------------------|-----------------------------------|----------------------------|--------------|------------------------|
| Compound, structure, or table-entry number | New      | Known | Melting point range | IR | UV-Vis | <sup>1</sup> H NMR | <sup>13</sup> C NMR | NMR | MS | HRMS | Optical rotation/ORD/CD | Enantiomeric/Diastereomeric ratio | X-ray IORTEP and CIF in SI*[1] | Copy of <sup>1</sup> H/ <sup>13</sup> C NMR spectrum in SI* | Copy of chromatogram in SI* | Quant. GC, HPLC, or electrophoresis | Elemental analysis | Cartesian coordinates or Z-matrix | # of imaginary frequencies | Total energy | Supporting Information |
| 3                                          | X        |       |                     |    |        | X                  | X                   |     |    | X    |                         |                                   |                                | X                                                           |                             |                                     |                    |                                   |                            |              |                        |
| 13a                                        |          | X     |                     |    |        | X                  | X                   |     |    | X    |                         |                                   |                                | X                                                           |                             |                                     |                    |                                   |                            |              |                        |
| 13b                                        |          | X     |                     |    |        | X                  | X                   |     |    | X    |                         |                                   |                                | X                                                           |                             |                                     |                    |                                   |                            |              |                        |
| 13c                                        | X        |       |                     |    |        | X                  | X                   |     |    | X    |                         |                                   |                                | X                                                           |                             |                                     |                    |                                   |                            |              |                        |
| 13d                                        | X        |       |                     |    |        | X                  | X                   |     |    | X    |                         |                                   |                                | X                                                           |                             |                                     |                    |                                   |                            |              |                        |
| 13e                                        | X        |       |                     |    |        | X                  | X                   |     |    | X    |                         |                                   |                                | X                                                           |                             |                                     |                    |                                   |                            |              |                        |
| 13f                                        | X        |       |                     |    |        | X                  | X                   |     |    | X    |                         |                                   |                                | X                                                           |                             |                                     |                    |                                   |                            |              |                        |
| 13g                                        | X        |       |                     |    |        | X                  | X                   |     |    | X    |                         |                                   |                                | X                                                           |                             |                                     |                    |                                   |                            |              |                        |
| 15a                                        | X        |       |                     |    |        | X                  | X                   |     |    | X    |                         |                                   |                                | X                                                           |                             |                                     |                    |                                   |                            |              |                        |
| 15b                                        | X        |       |                     |    |        | X                  | X                   |     |    | X    |                         |                                   |                                | X                                                           |                             |                                     |                    |                                   |                            |              |                        |
| 15c                                        | X        |       |                     |    |        | X                  | X                   |     |    | X    |                         |                                   |                                | X                                                           |                             |                                     |                    |                                   |                            |              |                        |
| 15d                                        | X        |       |                     |    |        | X                  | X                   |     |    | X    |                         |                                   |                                | X                                                           |                             |                                     |                    |                                   |                            |              |                        |
| 15e                                        | X        |       |                     |    |        | X                  | X                   |     |    | X    |                         |                                   |                                | X                                                           |                             |                                     |                    |                                   |                            |              |                        |







| COMPOUND                                   | IDENTITY |       |                     |    |        |        |         |     |    |      |                         | PURITY                            |                              |   |                                    | COMPUTATIONAL DATA in SI*   |                                     |   |                    |   |                                   |                            |              |
|--------------------------------------------|----------|-------|---------------------|----|--------|--------|---------|-----|----|------|-------------------------|-----------------------------------|------------------------------|---|------------------------------------|-----------------------------|-------------------------------------|---|--------------------|---|-----------------------------------|----------------------------|--------------|
| Compound, structure, or table-entry number | New      | Known | Melting point range | IR | UV-Vis | 1H NMR | 13C NMR | NMR | MS | HRMS | Optical rotation/ORD/CD | Enantiomeric/Diastereomeric ratio | X-ray [ORTEP and CIF in SI*] | ↔ | Copy of 1H/13C NMR spectrum in SI* | Copy of chromatogram in SI* | Quant. GC, HPLC, or electrophoresis | ↔ | Elemental analysis | ↔ | Cartesian coordinates or Z-matrix | # of imaginary frequencies | Total energy |
|                                            |          |       |                     |    |        |        |         |     |    |      |                         |                                   |                              |   |                                    |                             |                                     |   |                    |   |                                   |                            |              |
|                                            |          |       |                     |    |        |        |         |     |    |      |                         |                                   |                              |   |                                    |                             |                                     |   |                    |   |                                   |                            |              |
|                                            |          |       |                     |    |        |        |         |     |    |      |                         |                                   |                              |   |                                    |                             |                                     |   |                    |   |                                   |                            |              |
|                                            |          |       |                     |    |        |        |         |     |    |      |                         |                                   |                              |   |                                    |                             |                                     |   |                    |   |                                   |                            |              |
|                                            |          |       |                     |    |        |        |         |     |    |      |                         |                                   |                              |   |                                    |                             |                                     |   |                    |   |                                   |                            |              |
|                                            |          |       |                     |    |        |        |         |     |    |      |                         |                                   |                              |   |                                    |                             |                                     |   |                    |   |                                   |                            |              |

\* SI =  
Supporting  
Information
